# Supplementary material for: Effect of high glucose on the gene expression profiling in cardiac fibroblasts from rats at different ages
Source: PeerJ journal article supplement (doi:10.7717/peerj.19040), 2025-03-03
Supplement: DataFigure3A.xlsx [file DataFigure3A.xlsx]

## Sheet: N Venn diagrams common genes GO
Up					Down
Term	GO_namespace	gene_num			Term	GO_namespace	gene_num
presynaptic process involved in chemical synaptic transmission	biological_process	2			localization	biological_process	273
negative regulation of biological process	biological_process	40			negative regulation of biological process	biological_process	221
positive regulation of biological process	biological_process	42			cellular component organization or biogenesis	biological_process	243
biological regulation	biological_process	84			regulation of biological process	biological_process	477
localization	biological_process	56			behavior	biological_process	57
multi-organism process	biological_process	19			biological phase	biological_process	1
cellular component organization or biogenesis	biological_process	41			cellular process	biological_process	596
signaling	biological_process	56			positive regulation of biological process	biological_process	282
biological adhesion	biological_process	16			signaling	biological_process	284
reproductive process	biological_process	15			biological regulation	biological_process	491
reproduction	biological_process	15			multicellular organismal process	biological_process	337
behavior	biological_process	20			metabolic process	biological_process	403
rhythmic process	biological_process	2			response to stimulus	biological_process	391
growth	biological_process	12			single-organism process	biological_process	564
multicellular organismal process	biological_process	63			growth	biological_process	53
developmental process	biological_process	59			locomotion	biological_process	89
response to stimulus	biological_process	63			biological adhesion	biological_process	84
regulation of biological process	biological_process	76			presynaptic process involved in chemical synaptic transmission	biological_process	8
metabolic process	biological_process	76			developmental process	biological_process	281
locomotion	biological_process	23			rhythmic process	biological_process	17
immune system process	biological_process	16			immune system process	biological_process	152
single-organism process	biological_process	111			detoxification	biological_process	1
cellular process	biological_process	111			reproductive process	biological_process	53
membrane part	cellular_component	62			reproduction	biological_process	53
synapse	cellular_component	7			cell killing	biological_process	10
membrane-enclosed lumen	cellular_component	10			multi-organism process	biological_process	116
cell junction	cellular_component	11			synapse part	cellular_component	30
organelle	cellular_component	76			other organism	cellular_component	2
supramolecular complex	cellular_component	6			cell part	cellular_component	553
cell part	cellular_component	103			membrane-enclosed lumen	cellular_component	60
organelle part	cellular_component	31			cell	cellular_component	558
membrane	cellular_component	76			extracellular region part	cellular_component	169
extracellular region	cellular_component	45			other organism part	cellular_component	2
cell	cellular_component	103			organelle part	cellular_component	216
macromolecular complex	cellular_component	28			extracellular region	cellular_component	184
extracellular region part	cellular_component	41			supramolecular complex	cellular_component	83
synapse part	cellular_component	7			cell junction	cellular_component	67
structural molecule activity	molecular_function	2			membrane part	cellular_component	334
chemoattractant activity	molecular_function	1			membrane	cellular_component	411
translation regulator activity	molecular_function	1			macromolecular complex	cellular_component	157
molecular transducer activity	molecular_function	13			organelle	cellular_component	414
electron carrier activity	molecular_function	1			synapse	cellular_component	37
transporter activity	molecular_function	18			transcription factor activity, protein binding	molecular_function	11
catalytic activity	molecular_function	37			transporter activity	molecular_function	62
nucleic acid binding transcription factor activity	molecular_function	15			molecular transducer activity	molecular_function	89
signal transducer activity	molecular_function	15			nucleic acid binding transcription factor activity	molecular_function	25
transcription factor activity, protein binding	molecular_function	3			structural molecule activity	molecular_function	22
antioxidant activity	molecular_function	1			chemorepellent activity	molecular_function	4
binding	molecular_function	101			chemoattractant activity	molecular_function	3
molecular function regulator	molecular_function	15			catalytic activity	molecular_function	190
					antioxidant activity	molecular_function	1
					binding	molecular_function	553
					protein tag	molecular_function	1
					translation regulator activity	molecular_function	1
					molecular function regulator	molecular_function	55
					electron carrier activity	molecular_function	4
					signal transducer activity	molecular_function	80
