# Supplementary material for: Effect of high glucose on the gene expression profiling in cardiac fibroblasts from rats at different ages
Source: PeerJ journal article supplement (doi:10.7717/peerj.19040), 2025-03-03
Supplement: DataFigure3B.xlsx [file DataFigure3B.xlsx]

## Sheet: N group
S2 vs S1	S3 vs S1	S4 vs S1
ENSRNOG00000008176	ENSRNOG00000008176	ENSRNOG00000008176
ENSRNOG00000008536	ENSRNOG00000008536	ENSRNOG00000008536
ENSRNOG00000025757	ENSRNOG00000016983	ENSRNOG00000016983
ENSRNOG00000016983	ENSRNOG00000025757	ENSRNOG00000025757
ENSRNOG00000000413	ENSRNOG00000000413	ENSRNOG00000020955
ENSRNOG00000017833	ENSRNOG00000020955	ENSRNOG00000018943
ENSRNOG00000018943	ENSRNOG00000016243	ENSRNOG00000016243
ENSRNOG00000016243	ENSRNOG00000017833	ENSRNOG00000012307
ENSRNOG00000012307	ENSRNOG00000018943	ENSRNOG00000019810
ENSRNOG00000020955	ENSRNOG00000012307	ENSRNOG00000000413
ENSRNOG00000017060	ENSRNOG00000002256	ENSRNOG00000017060
ENSRNOG00000016714	ENSRNOG00000017060	ENSRNOG00000002256
ENSRNOG00000002256	ENSRNOG00000016714	ENSRNOG00000016714
ENSRNOG00000005269	ENSRNOG00000016460	ENSRNOG00000031643
ENSRNOG00000006151	ENSRNOG00000019810	ENSRNOG00000005269
ENSRNOG00000014327	ENSRNOG00000002579	ENSRNOG00000006151
ENSRNOG00000019810	ENSRNOG00000005269	ENSRNOG00000018250
ENSRNOG00000018250	ENSRNOG00000006151	ENSRNOG00000014327
ENSRNOG00000037085	ENSRNOG00000014327	ENSRNOG00000012681
ENSRNOG00000059166	ENSRNOG00000021084	ENSRNOG00000037085
ENSRNOG00000012477	ENSRNOG00000001480	ENSRNOG00000024243
ENSRNOG00000021090	ENSRNOG00000019851	ENSRNOG00000059166
ENSRNOG00000022099	ENSRNOG00000018250	ENSRNOG00000058539
ENSRNOG00000009073	ENSRNOG00000059166	ENSRNOG00000001963
ENSRNOG00000014815	ENSRNOG00000012477	ENSRNOG00000013484
ENSRNOG00000009466	ENSRNOG00000022099	ENSRNOG00000057092
ENSRNOG00000011659	ENSRNOG00000012723	ENSRNOG00000055111
ENSRNOG00000019851	ENSRNOG00000010841	ENSRNOG00000009073
ENSRNOG00000028238	ENSRNOG00000037085	ENSRNOG00000021090
ENSRNOG00000015049	ENSRNOG00000006604	ENSRNOG00000020281
ENSRNOG00000048430	ENSRNOG00000014815	ENSRNOG00000003388
ENSRNOG00000023227	ENSRNOG00000009052	ENSRNOG00000019851
ENSRNOG00000010840	ENSRNOG00000011659	ENSRNOG00000009466
ENSRNOG00000012723	ENSRNOG00000009466	ENSRNOG00000011659
ENSRNOG00000009450	ENSRNOG00000021090	ENSRNOG00000015131
ENSRNOG00000008949	ENSRNOG00000007905	ENSRNOG00000022099
ENSRNOG00000007495	ENSRNOG00000042860	ENSRNOG00000015354
ENSRNOG00000016526	ENSRNOG00000009073	ENSRNOG00000012723
ENSRNOG00000013391	ENSRNOG00000028238	ENSRNOG00000027035
ENSRNOG00000006122	ENSRNOG00000058752	ENSRNOG00000008797
ENSRNOG00000057701	ENSRNOG00000028015	ENSRNOG00000000632
ENSRNOG00000011754	ENSRNOG00000017546	ENSRNOG00000015049
ENSRNOG00000030848	ENSRNOG00000037563	ENSRNOG00000005936
ENSRNOG00000058068	ENSRNOG00000048430	ENSRNOG00000014815
ENSRNOG00000002579	ENSRNOG00000008949	ENSRNOG00000013133
ENSRNOG00000058752	ENSRNOG00000004517	ENSRNOG00000028415
ENSRNOG00000027230	ENSRNOG00000018414	ENSRNOG00000012566
ENSRNOG00000047218	ENSRNOG00000023227	ENSRNOG00000026143
ENSRNOG00000003722	ENSRNOG00000006122	ENSRNOG00000059900
ENSRNOG00000034258	ENSRNOG00000012367	ENSRNOG00000049708
ENSRNOG00000006604	ENSRNOG00000009450	ENSRNOG00000013057
ENSRNOG00000006025	ENSRNOG00000017484	ENSRNOG00000018815
ENSRNOG00000004327	ENSRNOG00000021243	ENSRNOG00000024428
ENSRNOG00000029079	ENSRNOG00000052017	ENSRNOG00000032929
ENSRNOG00000046468	ENSRNOG00000047218	ENSRNOG00000008040
ENSRNOG00000004516	ENSRNOG00000002365	ENSRNOG00000012835
ENSRNOG00000020369	ENSRNOG00000019728	ENSRNOG00000019100
ENSRNOG00000022697	ENSRNOG00000018251	ENSRNOG00000010306
ENSRNOG00000006146	ENSRNOG00000007495	ENSRNOG00000011913
ENSRNOG00000006776	ENSRNOG00000020369	ENSRNOG00000052564
ENSRNOG00000020747	ENSRNOG00000000815	ENSRNOG00000015794
ENSRNOG00000014867	ENSRNOG00000011054	ENSRNOG00000050819
ENSRNOG00000003616	ENSRNOG00000038881	ENSRNOG00000051158
ENSRNOG00000012720	ENSRNOG00000017980	ENSRNOG00000016412
ENSRNOG00000021029	ENSRNOG00000043451	ENSRNOG00000048430
ENSRNOG00000008141	ENSRNOG00000013973	ENSRNOG00000017833
ENSRNOG00000005390	ENSRNOG00000030848	ENSRNOG00000047314
ENSRNOG00000010841	ENSRNOG00000011754	ENSRNOG00000027894
ENSRNOG00000011994	ENSRNOG00000014867	ENSRNOG00000024178
ENSRNOG00000013641	ENSRNOG00000007377	ENSRNOG00000003183
ENSRNOG00000000704	ENSRNOG00000016526	ENSRNOG00000022261
ENSRNOG00000047706	ENSRNOG00000002097	ENSRNOG00000014837
ENSRNOG00000061147	ENSRNOG00000046254	ENSRNOG00000011654
ENSRNOG00000001128	ENSRNOG00000027230	ENSRNOG00000029055
ENSRNOG00000032410	ENSRNOG00000013578	ENSRNOG00000014021
ENSRNOG00000043387	ENSRNOG00000022697	ENSRNOG00000021198
ENSRNOG00000015550	ENSRNOG00000013391	ENSRNOG00000020807
ENSRNOG00000033796	ENSRNOG00000010319	ENSRNOG00000032778
ENSRNOG00000007905	ENSRNOG00000010840	ENSRNOG00000013917
ENSRNOG00000009736	ENSRNOG00000036829	ENSRNOG00000003802
ENSRNOG00000046972	ENSRNOG00000003622	ENSRNOG00000016454
ENSRNOG00000013306	ENSRNOG00000021586	ENSRNOG00000023227
ENSRNOG00000011648	ENSRNOG00000003722	ENSRNOG00000014874
ENSRNOG00000012566	ENSRNOG00000016623	ENSRNOG00000006122
ENSRNOG00000016837	ENSRNOG00000005390	ENSRNOG00000006604
ENSRNOG00000017786	ENSRNOG00000013641	ENSRNOG00000006649
ENSRNOG00000029141	ENSRNOG00000009001	ENSRNOG00000007906
ENSRNOG00000028015	ENSRNOG00000005809	ENSRNOG00000032959
ENSRNOG00000027024	ENSRNOG00000033734	ENSRNOG00000046452
ENSRNOG00000017421	ENSRNOG00000058068	ENSRNOG00000021243
ENSRNOG00000000500	ENSRNOG00000001224	ENSRNOG00000004479
ENSRNOG00000012609	ENSRNOG00000049471	ENSRNOG00000011068
ENSRNOG00000016543	ENSRNOG00000007350	ENSRNOG00000060356
ENSRNOG00000005670	ENSRNOG00000005639	ENSRNOG00000003453
ENSRNOG00000008423	ENSRNOG00000005670	ENSRNOG00000008949
ENSRNOG00000008806	ENSRNOG00000029079	ENSRNOG00000039668
ENSRNOG00000029401	ENSRNOG00000001128	ENSRNOG00000015529
ENSRNOG00000016460	ENSRNOG00000013179	ENSRNOG00000006198
ENSRNOG00000005798	ENSRNOG00000006146	ENSRNOG00000057760
ENSRNOG00000017672	ENSRNOG00000013720	ENSRNOG00000018113
ENSRNOG00000019404	ENSRNOG00000011648	ENSRNOG00000029107
ENSRNOG00000005053	ENSRNOG00000017277	ENSRNOG00000006653
ENSRNOG00000012303	ENSRNOG00000046699	ENSRNOG00000013547
ENSRNOG00000057880	ENSRNOG00000013220	ENSRNOG00000060703
ENSRNOG00000005639	ENSRNOG00000000655	ENSRNOG00000001369
ENSRNOG00000028945	ENSRNOG00000004327	ENSRNOG00000007495
ENSRNOG00000020532	ENSRNOG00000047706	ENSRNOG00000021084
ENSRNOG00000009522	ENSRNOG00000012779	ENSRNOG00000009450
ENSRNOG00000029399	ENSRNOG00000046834	ENSRNOG00000028238
ENSRNOG00000011541	ENSRNOG00000016496	ENSRNOG00000027811
ENSRNOG00000060021	ENSRNOG00000029399	ENSRNOG00000014080
ENSRNOG00000019403	ENSRNOG00000024159	ENSRNOG00000011754
ENSRNOG00000027736	ENSRNOG00000057701	ENSRNOG00000050071
ENSRNOG00000005934	ENSRNOG00000002385	ENSRNOG00000011296
ENSRNOG00000052564	ENSRNOG00000034258	ENSRNOG00000008986
ENSRNOG00000000653	ENSRNOG00000003616	ENSRNOG00000014343
ENSRNOG00000012367	ENSRNOG00000059770	ENSRNOG00000043451
ENSRNOG00000008942	ENSRNOG00000011490	ENSRNOG00000016526
ENSRNOG00000004473	ENSRNOG00000046468	ENSRNOG00000030848
ENSRNOG00000053640	ENSRNOG00000011994	ENSRNOG00000024077
ENSRNOG00000052498	ENSRNOG00000027811	ENSRNOG00000029141
ENSRNOG00000017546	ENSRNOG00000005807	ENSRNOG00000030101
ENSRNOG00000059857	ENSRNOG00000021157	ENSRNOG00000038035
ENSRNOG00000019648	ENSRNOG00000054524	ENSRNOG00000013069
ENSRNOG00000005690	ENSRNOG00000022975	ENSRNOG00000012318
ENSRNOG00000011901	ENSRNOG00000059140	ENSRNOG00000009052
ENSRNOG00000027491	ENSRNOG00000043387	ENSRNOG00000049349
ENSRNOG00000042860	ENSRNOG00000015049	ENSRNOG00000008165
ENSRNOG00000002097	ENSRNOG00000051307	ENSRNOG00000013598
ENSRNOG00000052006	ENSRNOG00000012160	ENSRNOG00000001480
ENSRNOG00000021670	ENSRNOG00000033527	ENSRNOG00000051615
ENSRNOG00000028225	ENSRNOG00000045992	ENSRNOG00000009334
ENSRNOG00000021128	ENSRNOG00000020729	ENSRNOG00000018233
ENSRNOG00000018551	ENSRNOG00000039668	ENSRNOG00000015810
ENSRNOG00000058645	ENSRNOG00000014166	ENSRNOG00000056209
ENSRNOG00000016623	ENSRNOG00000003453	ENSRNOG00000053272
ENSRNOG00000021053	ENSRNOG00000058034	ENSRNOG00000038881
ENSRNOG00000007377	ENSRNOG00000012566	ENSRNOG00000024650
ENSRNOG00000047781	ENSRNOG00000009912	ENSRNOG00000016479
ENSRNOG00000016838	ENSRNOG00000008465	ENSRNOG00000059997
ENSRNOG00000013552	ENSRNOG00000021199	ENSRNOG00000028259
ENSRNOG00000018598	ENSRNOG00000024243	ENSRNOG00000000636
ENSRNOG00000020719	ENSRNOG00000008045	ENSRNOG00000017277
ENSRNOG00000019278	ENSRNOG00000012172	ENSRNOG00000010721
ENSRNOG00000002459	ENSRNOG00000053200	ENSRNOG00000010386
ENSRNOG00000013927	ENSRNOG00000019404	ENSRNOG00000013774
ENSRNOG00000009052	ENSRNOG00000026235	ENSRNOG00000056069
ENSRNOG00000054524	ENSRNOG00000008933	ENSRNOG00000010063
ENSRNOG00000028649	ENSRNOG00000017414	ENSRNOG00000003722
ENSRNOG00000033893	ENSRNOG00000020030	ENSRNOG00000031431
ENSRNOG00000019587	ENSRNOG00000006324	ENSRNOG00000018929
ENSRNOG00000013474	ENSRNOG00000061147	ENSRNOG00000014130
ENSRNOG00000040108	ENSRNOG00000053272	ENSRNOG00000014960
ENSRNOG00000004517	ENSRNOG00000010516	ENSRNOG00000016516
ENSRNOG00000015318	ENSRNOG00000002208	ENSRNOG00000024365
ENSRNOG00000009726	ENSRNOG00000023708	ENSRNOG00000058752
ENSRNOG00000018378	ENSRNOG00000016543	ENSRNOG00000024382
ENSRNOG00000008966	ENSRNOG00000008141	ENSRNOG00000005390
ENSRNOG00000007302	ENSRNOG00000006025	ENSRNOG00000021713
ENSRNOG00000030210	ENSRNOG00000024382	ENSRNOG00000017414
ENSRNOG00000013720	ENSRNOG00000012681	ENSRNOG00000021433
ENSRNOG00000003357	ENSRNOG00000016469	ENSRNOG00000054957
ENSRNOG00000028043	ENSRNOG00000004192	ENSRNOG00000032446
ENSRNOG00000006420	ENSRNOG00000030930	ENSRNOG00000011946
ENSRNOG00000003172	ENSRNOG00000017020	ENSRNOG00000032596
ENSRNOG00000017206	ENSRNOG00000008409	ENSRNOG00000000479
ENSRNOG00000053766	ENSRNOG00000011901	ENSRNOG00000025198
ENSRNOG00000015310	ENSRNOG00000033796	ENSRNOG00000029401
ENSRNOG00000023803	ENSRNOG00000006776	ENSRNOG00000017206
ENSRNOG00000049452	ENSRNOG00000005798	ENSRNOG00000038286
ENSRNOG00000047393	ENSRNOG00000020747	ENSRNOG00000058856
ENSRNOG00000011750	ENSRNOG00000019147	ENSRNOG00000029598
ENSRNOG00000019361	ENSRNOG00000007726	ENSRNOG00000003657
ENSRNOG00000018694	ENSRNOG00000010266	ENSRNOG00000028015
ENSRNOG00000014656	ENSRNOG00000012720	ENSRNOG00000017484
ENSRNOG00000049410	ENSRNOG00000021029	ENSRNOG00000061085
ENSRNOG00000025053	ENSRNOG00000004249	ENSRNOG00000012280
ENSRNOG00000014409	ENSRNOG00000047606	ENSRNOG00000002208
ENSRNOG00000030285	ENSRNOG00000020532	ENSRNOG00000004682
ENSRNOG00000020060	ENSRNOG00000052564	ENSRNOG00000016689
ENSRNOG00000046788	ENSRNOG00000032410	ENSRNOG00000019620
ENSRNOG00000004583	ENSRNOG00000040108	ENSRNOG00000037211
ENSRNOG00000010320	ENSRNOG00000014294	ENSRNOG00000010840
ENSRNOG00000011478	ENSRNOG00000029401	ENSRNOG00000033335
ENSRNOG00000010977	ENSRNOG00000010977	ENSRNOG00000009339
ENSRNOG00000019627	ENSRNOG00000013547	ENSRNOG00000019403
ENSRNOG00000031208	ENSRNOG00000011245	ENSRNOG00000018715
ENSRNOG00000015354	ENSRNOG00000030285	ENSRNOG00000008115
ENSRNOG00000000142	ENSRNOG00000015089	ENSRNOG00000059894
ENSRNOG00000004400	ENSRNOG00000022565	ENSRNOG00000029768
ENSRNOG00000014021	ENSRNOG00000017786	ENSRNOG00000021847
ENSRNOG00000058983	ENSRNOG00000050430	ENSRNOG00000015423
ENSRNOG00000006930	ENSRNOG00000000704	ENSRNOG00000019728
ENSRNOG00000007726	ENSRNOG00000047800	ENSRNOG00000005931
ENSRNOG00000013973	ENSRNOG00000058337	ENSRNOG00000008373
ENSRNOG00000004699	ENSRNOG00000000853	ENSRNOG00000005037
ENSRNOG00000007706	ENSRNOG00000018434	ENSRNOG00000018251
ENSRNOG00000002052	ENSRNOG00000012807	ENSRNOG00000048411
ENSRNOG00000005082	ENSRNOG00000024536	ENSRNOG00000003208
ENSRNOG00000033527	ENSRNOG00000015550	ENSRNOG00000009912
ENSRNOG00000002810	ENSRNOG00000042905	ENSRNOG00000017259
ENSRNOG00000028545	ENSRNOG00000019648	ENSRNOG00000051528
ENSRNOG00000002511	ENSRNOG00000009736	ENSRNOG00000012367
ENSRNOG00000001480	ENSRNOG00000004516	ENSRNOG00000033527
ENSRNOG00000021586	ENSRNOG00000054251	ENSRNOG00000010841
ENSRNOG00000059350	ENSRNOG00000027491	ENSRNOG00000000201
ENSRNOG00000013694	ENSRNOG00000006653	ENSRNOG00000048166
ENSRNOG00000014163	ENSRNOG00000007679	ENSRNOG00000004487
ENSRNOG00000013324	ENSRNOG00000011750	ENSRNOG00000011971
ENSRNOG00000021468	ENSRNOG00000014653	ENSRNOG00000009629
ENSRNOG00000002436	ENSRNOG00000019203	ENSRNOG00000010047
ENSRNOG00000010992	ENSRNOG00000029141	ENSRNOG00000029061
ENSRNOG00000042460	ENSRNOG00000011000	ENSRNOG00000013727
ENSRNOG00000056940	ENSRNOG00000028016	ENSRNOG00000016377
ENSRNOG00000008373	ENSRNOG00000010181	ENSRNOG00000033734
ENSRNOG00000015093	ENSRNOG00000009331	ENSRNOG00000007338
ENSRNOG00000023465	ENSRNOG00000006420	ENSRNOG00000015089
ENSRNOG00000032703	ENSRNOG00000016837	ENSRNOG00000009503
ENSRNOG00000018606	ENSRNOG00000016838	ENSRNOG00000004327
ENSRNOG00000008173	ENSRNOG00000053288	ENSRNOG00000007256
ENSRNOG00000012095	ENSRNOG00000025691	ENSRNOG00000039744
ENSRNOG00000042753	ENSRNOG00000021100	ENSRNOG00000015921
ENSRNOG00000052017	ENSRNOG00000003357	ENSRNOG00000057701
ENSRNOG00000001007	ENSRNOG00000021424	ENSRNOG00000012062
ENSRNOG00000033528	ENSRNOG00000031045	ENSRNOG00000001143
ENSRNOG00000000805	ENSRNOG00000005871	ENSRNOG00000000795
ENSRNOG00000000239	ENSRNOG00000019445	ENSRNOG00000004921
ENSRNOG00000003479	ENSRNOG00000006940	ENSRNOG00000047706
ENSRNOG00000017311	ENSRNOG00000060329	ENSRNOG00000022911
ENSRNOG00000033772	ENSRNOG00000012095	ENSRNOG00000037563
ENSRNOG00000020695	ENSRNOG00000061403	ENSRNOG00000011824
ENSRNOG00000013954	ENSRNOG00000013474	ENSRNOG00000004968
ENSRNOG00000008943	ENSRNOG00000038286	ENSRNOG00000032178
ENSRNOG00000052725	ENSRNOG00000018233	ENSRNOG00000016469
ENSRNOG00000020014	ENSRNOG00000021161	ENSRNOG00000001953
ENSRNOG00000010797	ENSRNOG00000000187	ENSRNOG00000021166
ENSRNOG00000046547	ENSRNOG00000024931	ENSRNOG00000039859
ENSRNOG00000011411	ENSRNOG00000005825	ENSRNOG00000000187
ENSRNOG00000026644	ENSRNOG00000007338	ENSRNOG00000011478
ENSRNOG00000056697	ENSRNOG00000049282	ENSRNOG00000005115
ENSRNOG00000008933	ENSRNOG00000028992	ENSRNOG00000001349
ENSRNOG00000053163	ENSRNOG00000055751	ENSRNOG00000014137
ENSRNOG00000009348	ENSRNOG00000047781	ENSRNOG00000005195
ENSRNOG00000046699	ENSRNOG00000016810	ENSRNOG00000030058
ENSRNOG00000001557	ENSRNOG00000012609	ENSRNOG00000047800
ENSRNOG00000038286	ENSRNOG00000014021	ENSRNOG00000042860
ENSRNOG00000006649	ENSRNOG00000026143	ENSRNOG00000010701
ENSRNOG00000033570	ENSRNOG00000001752	ENSRNOG00000003999
ENSRNOG00000026604	ENSRNOG00000006649	ENSRNOG00000011777
ENSRNOG00000008697	ENSRNOG00000017421	ENSRNOG00000046972
ENSRNOG00000014166	ENSRNOG00000059857	ENSRNOG00000045752
ENSRNOG00000019622	ENSRNOG00000050697	ENSRNOG00000061100
ENSRNOG00000000187	ENSRNOG00000005690	ENSRNOG00000017981
ENSRNOG00000012512	ENSRNOG00000007393	ENSRNOG00000058068
ENSRNOG00000018276	ENSRNOG00000052064	ENSRNOG00000018094
ENSRNOG00000039969	ENSRNOG00000052006	ENSRNOG00000053047
ENSRNOG00000009919	ENSRNOG00000030021	ENSRNOG00000054474
ENSRNOG00000016219	ENSRNOG00000020719	ENSRNOG00000002488
ENSRNOG00000002208	ENSRNOG00000046972	ENSRNOG00000016810
ENSRNOG00000046133	ENSRNOG00000001369	ENSRNOG00000042944
ENSRNOG00000013547	ENSRNOG00000008806	ENSRNOG00000030021
ENSRNOG00000014964	ENSRNOG00000026604	ENSRNOG00000004516
ENSRNOG00000003669	ENSRNOG00000006557	ENSRNOG00000018627
ENSRNOG00000059500	ENSRNOG00000004400	ENSRNOG00000008880
ENSRNOG00000057308	ENSRNOG00000003999	ENSRNOG00000024114
ENSRNOG00000003209	ENSRNOG00000017226	ENSRNOG00000016343
ENSRNOG00000027109	ENSRNOG00000060021	ENSRNOG00000011054
ENSRNOG00000036692	ENSRNOG00000014879	ENSRNOG00000014956
ENSRNOG00000001259	ENSRNOG00000022777	ENSRNOG00000046699
ENSRNOG00000053037	ENSRNOG00000003954	ENSRNOG00000012216
ENSRNOG00000014538	ENSRNOG00000000699	ENSRNOG00000012119
ENSRNOG00000013679	ENSRNOG00000006231	ENSRNOG00000029079
ENSRNOG00000007613	ENSRNOG00000008666	ENSRNOG00000006048
ENSRNOG00000002934	ENSRNOG00000005620	ENSRNOG00000009785
ENSRNOG00000033217	ENSRNOG00000006357	ENSRNOG00000020119
ENSRNOG00000018735	ENSRNOG00000011977	ENSRNOG00000034258
ENSRNOG00000016724	ENSRNOG00000042139	ENSRNOG00000004249
ENSRNOG00000004766	ENSRNOG00000012303	ENSRNOG00000036703
ENSRNOG00000003442	ENSRNOG00000037838	ENSRNOG00000020851
ENSRNOG00000061100	ENSRNOG00000020845	ENSRNOG00000013521
ENSRNOG00000000383	ENSRNOG00000009734	ENSRNOG00000017874
ENSRNOG00000024382	ENSRNOG00000008423	ENSRNOG00000032472
ENSRNOG00000039582	ENSRNOG00000019430	ENSRNOG00000001088
ENSRNOG00000019316	ENSRNOG00000022859	ENSRNOG00000007483
ENSRNOG00000002488	ENSRNOG00000049880	ENSRNOG00000022975
ENSRNOG00000039668	ENSRNOG00000001254	ENSRNOG00000022859
ENSRNOG00000003596	ENSRNOG00000013679	ENSRNOG00000023261
ENSRNOG00000016671	ENSRNOG00000010018	ENSRNOG00000012160
ENSRNOG00000018233	ENSRNOG00000019627	ENSRNOG00000005659
ENSRNOG00000053384	ENSRNOG00000013922	ENSRNOG00000015357
ENSRNOG00000004147	ENSRNOG00000017672	ENSRNOG00000020871
ENSRNOG00000055078	ENSRNOG00000020105	ENSRNOG00000019141
ENSRNOG00000015089	ENSRNOG00000051158	ENSRNOG00000024420
ENSRNOG00000007142	ENSRNOG00000005053	ENSRNOG00000033192
ENSRNOG00000032339	ENSRNOG00000043219	ENSRNOG00000050111
ENSRNOG00000017226	ENSRNOG00000028043	ENSRNOG00000005798
ENSRNOG00000049942	ENSRNOG00000005934	ENSRNOG00000009772
ENSRNOG00000000373	ENSRNOG00000028036	ENSRNOG00000016301
ENSRNOG00000049471	ENSRNOG00000021644	ENSRNOG00000037409
ENSRNOG00000012280	ENSRNOG00000050509	ENSRNOG00000012094
ENSRNOG00000053288	ENSRNOG00000030034	ENSRNOG00000060100
ENSRNOG00000004458	ENSRNOG00000010063	ENSRNOG00000029399
ENSRNOG00000012721	ENSRNOG00000020695	ENSRNOG00000024082
ENSRNOG00000032959	ENSRNOG00000025625	ENSRNOG00000013578
ENSRNOG00000006324	ENSRNOG00000049452	ENSRNOG00000025946
ENSRNOG00000006204	ENSRNOG00000008942	ENSRNOG00000015275
ENSRNOG00000002802	ENSRNOG00000028945	ENSRNOG00000017962
ENSRNOG00000017560	ENSRNOG00000037331	ENSRNOG00000006025
ENSRNOG00000008237	ENSRNOG00000009347	ENSRNOG00000016152
ENSRNOG00000006653	ENSRNOG00000030880	ENSRNOG00000046468
ENSRNOG00000023162	ENSRNOG00000016671	ENSRNOG00000012083
ENSRNOG00000008001	ENSRNOG00000018378	ENSRNOG00000003869
ENSRNOG00000006509	ENSRNOG00000006079	ENSRNOG00000008932
ENSRNOG00000022777	ENSRNOG00000057058	ENSRNOG00000049033
ENSRNOG00000053753	ENSRNOG00000019890	ENSRNOG00000005670
ENSRNOG00000013179	ENSRNOG00000009522	ENSRNOG00000007805
ENSRNOG00000056457	ENSRNOG00000017874	ENSRNOG00000016156
ENSRNOG00000023708	ENSRNOG00000009385	ENSRNOG00000017765
ENSRNOG00000049880	ENSRNOG00000030776	ENSRNOG00000002553
ENSRNOG00000046005	ENSRNOG00000001431	ENSRNOG00000022521
ENSRNOG00000013484	ENSRNOG00000002820	ENSRNOG00000016706
ENSRNOG00000007319	ENSRNOG00000002810	ENSRNOG00000012051
ENSRNOG00000002947	ENSRNOG00000010232	ENSRNOG00000000653
ENSRNOG00000009872	ENSRNOG00000058983	ENSRNOG00000028137
ENSRNOG00000049351	ENSRNOG00000021802	ENSRNOG00000020531
ENSRNOG00000018858	ENSRNOG00000032339	ENSRNOG00000001224
ENSRNOG00000018602	ENSRNOG00000008855	ENSRNOG00000007467
ENSRNOG00000006086	ENSRNOG00000053430	ENSRNOG00000027230
ENSRNOG00000017854	ENSRNOG00000018350	ENSRNOG00000021424
ENSRNOG00000019418	ENSRNOG00000008846	ENSRNOG00000054524
ENSRNOG00000018254	ENSRNOG00000032396	ENSRNOG00000023628
ENSRNOG00000057464	ENSRNOG00000019680	ENSRNOG00000018040
ENSRNOG00000024345	ENSRNOG00000033893	ENSRNOG00000002820
ENSRNOG00000060949	ENSRNOG00000046788	ENSRNOG00000014163
ENSRNOG00000043219	ENSRNOG00000025209	ENSRNOG00000001295
ENSRNOG00000046829	ENSRNOG00000014956	ENSRNOG00000048449
ENSRNOG00000012879	ENSRNOG00000024114	ENSRNOG00000020263
ENSRNOG00000026053	ENSRNOG00000003587	ENSRNOG00000008933
ENSRNOG00000004712	ENSRNOG00000004444	ENSRNOG00000015741
ENSRNOG00000016372	ENSRNOG00000042492	ENSRNOG00000033796
ENSRNOG00000051619	ENSRNOG00000018276	ENSRNOG00000042286
ENSRNOG00000036677	ENSRNOG00000020980	ENSRNOG00000012531
ENSRNOG00000015357	ENSRNOG00000006926	ENSRNOG00000021802
ENSRNOG00000049714	ENSRNOG00000026306	ENSRNOG00000003346
ENSRNOG00000023548	ENSRNOG00000013742	ENSRNOG00000013167
ENSRNOG00000002365	ENSRNOG00000008738	ENSRNOG00000012543
ENSRNOG00000016267	ENSRNOG00000015310	ENSRNOG00000038572
ENSRNOG00000028992	ENSRNOG00000043201	ENSRNOG00000019582
ENSRNOG00000042939	ENSRNOG00000007993	ENSRNOG00000002343
ENSRNOG00000011593	ENSRNOG00000028225	ENSRNOG00000004133
ENSRNOG00000003999	ENSRNOG00000021128	ENSRNOG00000006776
ENSRNOG00000009802	ENSRNOG00000019278	ENSRNOG00000009331
ENSRNOG00000019680	ENSRNOG00000023005	ENSRNOG00000021259
ENSRNOG00000047606	ENSRNOG00000015423	ENSRNOG00000004667
ENSRNOG00000021548	ENSRNOG00000018804	ENSRNOG00000003622
ENSRNOG00000046599	ENSRNOG00000021670	ENSRNOG00000012720
ENSRNOG00000012989	ENSRNOG00000002459	ENSRNOG00000027491
ENSRNOG00000043199	ENSRNOG00000016058	ENSRNOG00000024798
ENSRNOG00000010378	ENSRNOG00000023428	ENSRNOG00000015329
ENSRNOG00000053086	ENSRNOG00000009726	ENSRNOG00000021029
ENSRNOG00000018804	ENSRNOG00000004089	ENSRNOG00000019243
ENSRNOG00000021256	ENSRNOG00000021536	ENSRNOG00000039183
ENSRNOG00000022637	ENSRNOG00000000653	ENSRNOG00000018414
ENSRNOG00000022694	ENSRNOG00000006108	ENSRNOG00000000655
ENSRNOG00000011562	ENSRNOG00000008237	ENSRNOG00000024688
ENSRNOG00000043350	ENSRNOG00000003291	ENSRNOG00000002471
ENSRNOG00000031163	ENSRNOG00000049942	ENSRNOG00000006146
ENSRNOG00000000940	ENSRNOG00000048951	ENSRNOG00000022697
ENSRNOG00000048321	ENSRNOG00000013167	ENSRNOG00000009005
ENSRNOG00000016058	ENSRNOG00000020281	ENSRNOG00000049537
ENSRNOG00000046834	ENSRNOG00000013141	ENSRNOG00000007890
ENSRNOG00000001750	ENSRNOG00000002794	ENSRNOG00000049471
ENSRNOG00000050040	ENSRNOG00000057092	ENSRNOG00000004412
ENSRNOG00000053113	ENSRNOG00000009620	ENSRNOG00000001524
ENSRNOG00000001302	ENSRNOG00000020060	ENSRNOG00000001229
ENSRNOG00000014398	ENSRNOG00000001302	ENSRNOG00000026235
ENSRNOG00000046763	ENSRNOG00000055078	ENSRNOG00000019752
ENSRNOG00000000257	ENSRNOG00000001007	ENSRNOG00000003515
ENSRNOG00000021536	ENSRNOG00000018606	ENSRNOG00000061070
ENSRNOG00000043201	ENSRNOG00000009790	ENSRNOG00000005615
ENSRNOG00000007584	ENSRNOG00000030187	ENSRNOG00000037838
ENSRNOG00000030021	ENSRNOG00000020263	ENSRNOG00000055300
ENSRNOG00000003587	ENSRNOG00000014963	ENSRNOG00000011213
ENSRNOG00000009951	ENSRNOG00000010497	ENSRNOG00000023005
ENSRNOG00000037563	ENSRNOG00000029107	ENSRNOG00000005376
ENSRNOG00000009790	ENSRNOG00000033059	ENSRNOG00000018551
ENSRNOG00000008846	ENSRNOG00000029662	ENSRNOG00000022325
ENSRNOG00000009445	ENSRNOG00000049782	ENSRNOG00000047606
ENSRNOG00000006641	ENSRNOG00000048365	ENSRNOG00000053045
ENSRNOG00000011000	ENSRNOG00000003596	ENSRNOG00000004964
ENSRNOG00000008930	ENSRNOG00000004414	ENSRNOG00000013720
ENSRNOG00000033734	ENSRNOG00000033744	ENSRNOG00000057464
ENSRNOG00000006926	ENSRNOG00000014656	ENSRNOG00000025209
ENSRNOG00000054080	ENSRNOG00000027109	ENSRNOG00000052006
ENSRNOG00000030880	ENSRNOG00000014603	ENSRNOG00000009303
ENSRNOG00000017874	ENSRNOG00000013306	ENSRNOG00000021199
ENSRNOG00000005871	ENSRNOG00000003183	ENSRNOG00000056714
ENSRNOG00000020875	ENSRNOG00000005378	ENSRNOG00000022707
ENSRNOG00000004276	ENSRNOG00000046848	ENSRNOG00000016724
ENSRNOG00000007159	ENSRNOG00000030712	ENSRNOG00000019161
ENSRNOG00000023943	ENSRNOG00000056714	ENSRNOG00000029342
ENSRNOG00000021719	ENSRNOG00000019161	ENSRNOG00000007292
ENSRNOG00000003251	ENSRNOG00000006911	ENSRNOG00000026252
ENSRNOG00000011227	ENSRNOG00000036703	ENSRNOG00000045924
ENSRNOG00000021840	ENSRNOG00000014163	ENSRNOG00000014336
ENSRNOG00000028743	ENSRNOG00000020636	ENSRNOG00000018874
ENSRNOG00000006911	ENSRNOG00000025946	ENSRNOG00000001627
ENSRNOG00000050869	ENSRNOG00000038999	ENSRNOG00000012477
ENSRNOG00000006859	ENSRNOG00000021713	ENSRNOG00000047656
ENSRNOG00000058891	ENSRNOG00000057880	ENSRNOG00000006731
ENSRNOG00000010970	ENSRNOG00000039754	ENSRNOG00000005871
ENSRNOG00000011977	ENSRNOG00000031058	ENSRNOG00000019418
ENSRNOG00000001158	ENSRNOG00000004409	ENSRNOG00000037198
ENSRNOG00000020980	ENSRNOG00000021548	ENSRNOG00000010183
ENSRNOG00000001825	ENSRNOG00000004964	ENSRNOG00000017850
ENSRNOG00000050509	ENSRNOG00000007654	ENSRNOG00000033658
ENSRNOG00000008947	ENSRNOG00000048166	ENSRNOG00000020747
ENSRNOG00000031643	ENSRNOG00000011478	ENSRNOG00000006075
ENSRNOG00000014705	ENSRNOG00000002667	ENSRNOG00000020845
ENSRNOG00000027811	ENSRNOG00000011039	ENSRNOG00000007350
ENSRNOG00000039571	ENSRNOG00000018715	ENSRNOG00000001469
ENSRNOG00000037409	ENSRNOG00000003207	ENSRNOG00000004242
ENSRNOG00000002667	ENSRNOG00000020119	ENSRNOG00000017783
ENSRNOG00000014835	ENSRNOG00000016301	ENSRNOG00000013220
ENSRNOG00000054549	ENSRNOG00000023465	ENSRNOG00000014867
ENSRNOG00000020729	ENSRNOG00000001711	ENSRNOG00000002331
ENSRNOG00000004660	ENSRNOG00000007918	ENSRNOG00000054286
ENSRNOG00000012436	ENSRNOG00000018694	ENSRNOG00000053895
ENSRNOG00000014508	ENSRNOG00000045924	ENSRNOG00000008409
ENSRNOG00000016684	ENSRNOG00000032989	ENSRNOG00000001514
ENSRNOG00000010181	ENSRNOG00000022884	ENSRNOG00000050106
ENSRNOG00000015741	ENSRNOG00000055721	ENSRNOG00000014098
ENSRNOG00000048951	ENSRNOG00000013552	ENSRNOG00000013074
ENSRNOG00000008027	ENSRNOG00000012109	ENSRNOG00000015520
ENSRNOG00000016516	ENSRNOG00000003959	ENSRNOG00000009919
ENSRNOG00000022884	ENSRNOG00000009919	ENSRNOG00000021586
ENSRNOG00000018052	ENSRNOG00000011521	ENSRNOG00000021264
ENSRNOG00000061376	ENSRNOG00000038035	ENSRNOG00000009736
ENSRNOG00000014956	ENSRNOG00000016413	ENSRNOG00000000598
ENSRNOG00000005506	ENSRNOG00000010992	ENSRNOG00000021242
ENSRNOG00000013578	ENSRNOG00000008966	ENSRNOG00000010274
ENSRNOG00000049349	ENSRNOG00000026050	ENSRNOG00000007377
ENSRNOG00000045829	ENSRNOG00000010320	ENSRNOG00000018237
ENSRNOG00000055721	ENSRNOG00000029543	ENSRNOG00000011167
ENSRNOG00000058034	ENSRNOG00000019361	ENSRNOG00000013141
ENSRNOG00000016679	ENSRNOG00000014496	ENSRNOG00000011648
ENSRNOG00000030106	ENSRNOG00000013927	ENSRNOG00000004192
ENSRNOG00000011154	ENSRNOG00000016978	ENSRNOG00000049402
ENSRNOG00000061910	ENSRNOG00000014409	ENSRNOG00000012772
ENSRNOG00000020119	ENSRNOG00000053640	ENSRNOG00000014653
ENSRNOG00000015260	ENSRNOG00000018602	ENSRNOG00000026060
ENSRNOG00000009468	ENSRNOG00000028548	ENSRNOG00000059878
ENSRNOG00000023720	ENSRNOG00000033570	ENSRNOG00000000563
ENSRNOG00000024120	ENSRNOG00000046547	ENSRNOG00000046254
ENSRNOG00000018282	ENSRNOG00000001288	ENSRNOG00000015465
ENSRNOG00000003183	ENSRNOG00000056069	ENSRNOG00000037302
ENSRNOG00000016388	ENSRNOG00000019403	ENSRNOG00000027787
ENSRNOG00000017188	ENSRNOG00000011068	ENSRNOG00000008450
ENSRNOG00000051307	ENSRNOG00000003800	ENSRNOG00000021555
ENSRNOG00000013166	ENSRNOG00000030715	ENSRNOG00000003217
ENSRNOG00000051024	ENSRNOG00000003104	ENSRNOG00000000572
ENSRNOG00000003800	ENSRNOG00000000201	ENSRNOG00000013503
ENSRNOG00000012681	ENSRNOG00000019138	ENSRNOG00000055751
ENSRNOG00000015075	ENSRNOG00000053047	ENSRNOG00000012172
ENSRNOG00000016479	ENSRNOG00000016294	ENSRNOG00000046635
ENSRNOG00000020088	ENSRNOG00000026653	ENSRNOG00000042905
ENSRNOG00000054548	ENSRNOG00000000632	ENSRNOG00000015982
ENSRNOG00000001217	ENSRNOG00000003895	ENSRNOG00000029520
ENSRNOG00000011107	ENSRNOG00000007364	ENSRNOG00000026965
ENSRNOG00000043451	ENSRNOG00000026647	ENSRNOG00000017546
ENSRNOG00000022859	ENSRNOG00000019418	ENSRNOG00000026502
ENSRNOG00000016696	ENSRNOG00000015318	ENSRNOG00000003908
ENSRNOG00000011039	ENSRNOG00000002436	ENSRNOG00000011994
ENSRNOG00000004249	ENSRNOG00000027035	ENSRNOG00000049282
ENSRNOG00000004414	ENSRNOG00000001959	ENSRNOG00000061910
ENSRNOG00000002794	ENSRNOG00000012611	ENSRNOG00000006509
ENSRNOG00000009001	ENSRNOG00000018282	ENSRNOG00000009789
ENSRNOG00000028390	ENSRNOG00000008816	ENSRNOG00000000239
ENSRNOG00000012058	ENSRNOG00000055411	ENSRNOG00000012149
ENSRNOG00000013748	ENSRNOG00000001229	ENSRNOG00000007821
ENSRNOG00000020105	ENSRNOG00000047393	ENSRNOG00000010181
ENSRNOG00000012471	ENSRNOG00000015354	ENSRNOG00000015308
ENSRNOG00000037199	ENSRNOG00000028930	ENSRNOG00000004882
ENSRNOG00000009822	ENSRNOG00000046452	ENSRNOG00000049505
ENSRNOG00000024433	ENSRNOG00000006946	ENSRNOG00000016837
ENSRNOG00000010513	ENSRNOG00000026644	ENSRNOG00000008046
ENSRNOG00000060528	ENSRNOG00000053037	ENSRNOG00000003486
ENSRNOG00000001653	ENSRNOG00000054080	ENSRNOG00000025604
ENSRNOG00000013851	ENSRNOG00000051615	ENSRNOG00000007364
ENSRNOG00000060524	ENSRNOG00000011411	ENSRNOG00000037449
ENSRNOG00000014573	ENSRNOG00000009503	ENSRNOG00000028636
ENSRNOG00000016878	ENSRNOG00000002711	ENSRNOG00000019110
ENSRNOG00000001912	ENSRNOG00000016377	ENSRNOG00000002292
ENSRNOG00000046452	ENSRNOG00000013564	ENSRNOG00000020908
ENSRNOG00000018445	ENSRNOG00000001189	ENSRNOG00000000521
ENSRNOG00000026060	ENSRNOG00000005936	ENSRNOG00000029911
ENSRNOG00000022419	ENSRNOG00000015075	ENSRNOG00000002365
ENSRNOG00000021735	ENSRNOG00000009848	ENSRNOG00000022777
ENSRNOG00000054212	ENSRNOG00000056697	ENSRNOG00000006741
ENSRNOG00000045811	ENSRNOG00000009802	ENSRNOG00000005695
ENSRNOG00000014248	ENSRNOG00000014171	ENSRNOG00000048365
ENSRNOG00000017073	ENSRNOG00000055049	ENSRNOG00000000529
ENSRNOG00000031934	ENSRNOG00000053384	ENSRNOG00000005809
ENSRNOG00000006591	ENSRNOG00000023628	ENSRNOG00000061484
ENSRNOG00000055751	ENSRNOG00000008481	ENSRNOG00000004781
ENSRNOG00000046254	ENSRNOG00000020991	ENSRNOG00000012779
ENSRNOG00000020636	ENSRNOG00000049708	ENSRNOG00000018782
ENSRNOG00000004554	ENSRNOG00000016684	ENSRNOG00000009347
ENSRNOG00000010325	ENSRNOG00000054954	ENSRNOG00000010524
ENSRNOG00000029543	ENSRNOG00000008943	ENSRNOG00000016460
ENSRNOG00000025946	ENSRNOG00000017319	ENSRNOG00000004195
ENSRNOG00000055411	ENSRNOG00000021053	ENSRNOG00000008904
ENSRNOG00000021424	ENSRNOG00000017197	ENSRNOG00000053430
ENSRNOG00000058111	ENSRNOG00000009872	ENSRNOG00000001692
ENSRNOG00000038297	ENSRNOG00000029055	ENSRNOG00000005038
ENSRNOG00000061595	ENSRNOG00000026295	ENSRNOG00000005193
ENSRNOG00000008481	ENSRNOG00000059350	ENSRNOG00000029862
ENSRNOG00000029911	ENSRNOG00000015131	ENSRNOG00000030210
ENSRNOG00000016163	ENSRNOG00000008869	ENSRNOG00000023262
ENSRNOG00000019752	ENSRNOG00000000636	ENSRNOG00000058645
ENSRNOG00000022712	ENSRNOG00000007431	ENSRNOG00000013683
ENSRNOG00000017149	ENSRNOG00000015741	ENSRNOG00000006735
ENSRNOG00000009047	ENSRNOG00000012110	ENSRNOG00000042561
ENSRNOG00000005615	ENSRNOG00000003496	ENSRNOG00000007493
ENSRNOG00000019161	ENSRNOG00000018929	ENSRNOG00000022884
ENSRNOG00000026235	ENSRNOG00000059894	ENSRNOG00000008615
ENSRNOG00000001229	ENSRNOG00000027859	ENSRNOG00000014193
ENSRNOG00000007393	ENSRNOG00000010721	ENSRNOG00000021206
ENSRNOG00000012110	ENSRNOG00000011032	ENSRNOG00000007221
ENSRNOG00000018859	ENSRNOG00000033064	ENSRNOG00000042492
ENSRNOG00000042970	ENSRNOG00000005404	ENSRNOG00000011901
ENSRNOG00000056585	ENSRNOG00000057308	ENSRNOG00000016316
ENSRNOG00000015449	ENSRNOG00000008115	ENSRNOG00000058034
ENSRNOG00000014963	ENSRNOG00000012835	ENSRNOG00000022686
ENSRNOG00000015160	ENSRNOG00000015024	ENSRNOG00000011284
ENSRNOG00000054954	ENSRNOG00000004736	ENSRNOG00000004708
ENSRNOG00000003895	ENSRNOG00000016878	ENSRNOG00000003954
ENSRNOG00000021589	ENSRNOG00000039969	ENSRNOG00000019174
ENSRNOG00000020803	ENSRNOG00000052037	ENSRNOG00000023093
ENSRNOG00000021170	ENSRNOG00000017854	ENSRNOG00000043219
ENSRNOG00000059956	ENSRNOG00000028649	ENSRNOG00000002711
ENSRNOG00000032472	ENSRNOG00000021170	ENSRNOG00000003703
ENSRNOG00000011533	ENSRNOG00000043350	ENSRNOG00000021986
ENSRNOG00000047174	ENSRNOG00000052407	ENSRNOG00000003479
ENSRNOG00000003954	ENSRNOG00000017403	ENSRNOG00000009080
ENSRNOG00000010438	ENSRNOG00000017684	ENSRNOG00000022499
ENSRNOG00000018646	ENSRNOG00000001249	ENSRNOG00000012609
ENSRNOG00000018262	ENSRNOG00000004841	ENSRNOG00000011332
ENSRNOG00000006255	ENSRNOG00000010253	ENSRNOG00000019681
ENSRNOG00000003683	ENSRNOG00000013886	ENSRNOG00000045992
ENSRNOG00000003291	ENSRNOG00000054474	ENSRNOG00000039740
ENSRNOG00000013589	ENSRNOG00000059073	ENSRNOG00000013324
ENSRNOG00000051977	ENSRNOG00000013694	ENSRNOG00000006996
ENSRNOG00000010063	ENSRNOG00000004781	ENSRNOG00000006410
ENSRNOG00000002322	ENSRNOG00000015902	ENSRNOG00000013322
ENSRNOG00000021814	ENSRNOG00000009471	ENSRNOG00000059837
ENSRNOG00000021855	ENSRNOG00000017259	ENSRNOG00000011688
ENSRNOG00000012422	ENSRNOG00000014125	ENSRNOG00000020695
ENSRNOG00000021103	ENSRNOG00000004921	ENSRNOG00000017020
ENSRNOG00000008015	ENSRNOG00000056257	ENSRNOG00000014303
ENSRNOG00000019336	ENSRNOG00000048961	ENSRNOG00000052247
ENSRNOG00000052037	ENSRNOG00000047714	ENSRNOG00000055259
ENSRNOG00000013674	ENSRNOG00000027739	ENSRNOG00000029662
ENSRNOG00000015406	ENSRNOG00000019316	ENSRNOG00000060381
ENSRNOG00000007461	ENSRNOG00000036960	ENSRNOG00000015585
ENSRNOG00000055512	ENSRNOG00000018113	ENSRNOG00000014166
ENSRNOG00000060329	ENSRNOG00000033567	ENSRNOG00000004972
ENSRNOG00000004482	ENSRNOG00000049560	ENSRNOG00000008001
ENSRNOG00000005809	ENSRNOG00000000855	ENSRNOG00000008055
ENSRNOG00000050714	ENSRNOG00000019270	ENSRNOG00000002135
ENSRNOG00000011184	ENSRNOG00000021560	ENSRNOG00000015461
ENSRNOG00000056944	ENSRNOG00000010695	ENSRNOG00000048838
ENSRNOG00000020644	ENSRNOG00000030210	ENSRNOG00000012436
ENSRNOG00000002339	ENSRNOG00000005008	ENSRNOG00000022657
ENSRNOG00000009131	ENSRNOG00000053086	ENSRNOG00000013970
ENSRNOG00000020792	ENSRNOG00000010265	ENSRNOG00000001030
ENSRNOG00000013515	ENSRNOG00000017156	ENSRNOG00000032546
ENSRNOG00000003969	ENSRNOG00000014964	ENSRNOG00000016038
ENSRNOG00000018603	ENSRNOG00000014524	ENSRNOG00000005639
ENSRNOG00000050675	ENSRNOG00000033791	ENSRNOG00000005730
ENSRNOG00000033567	ENSRNOG00000013484	ENSRNOG00000048321
ENSRNOG00000052167	ENSRNOG00000020088	ENSRNOG00000008423
ENSRNOG00000026116	ENSRNOG00000004473	ENSRNOG00000031536
ENSRNOG00000015858	ENSRNOG00000020014	ENSRNOG00000009802
ENSRNOG00000029768	ENSRNOG00000048321	ENSRNOG00000023148
ENSRNOG00000004210	ENSRNOG00000003669	ENSRNOG00000004936
ENSRNOG00000016469	ENSRNOG00000001557	ENSRNOG00000016561
ENSRNOG00000007999	ENSRNOG00000013133	ENSRNOG00000025742
ENSRNOG00000040201	ENSRNOG00000013748	ENSRNOG00000012035
ENSRNOG00000019504	ENSRNOG00000022839	ENSRNOG00000028548
ENSRNOG00000009514	ENSRNOG00000017146	ENSRNOG00000020583
ENSRNOG00000010592	ENSRNOG00000020699	ENSRNOG00000023304
ENSRNOG00000002843	ENSRNOG00000052725	ENSRNOG00000014232
ENSRNOG00000051235	ENSRNOG00000004198	ENSRNOG00000020532
ENSRNOG00000004040	ENSRNOG00000012721	ENSRNOG00000043076
ENSRNOG00000007657	ENSRNOG00000007690	ENSRNOG00000016058
ENSRNOG00000028548	ENSRNOG00000001963	ENSRNOG00000002146
ENSRNOG00000010389	ENSRNOG00000004583	ENSRNOG00000024008
ENSRNOG00000015184	ENSRNOG00000023943	ENSRNOG00000032813
ENSRNOG00000020118	ENSRNOG00000033921	ENSRNOG00000015551
ENSRNOG00000004133	ENSRNOG00000003748	ENSRNOG00000052555
ENSRNOG00000007118	ENSRNOG00000013994	ENSRNOG00000019147
ENSRNOG00000007078	ENSRNOG00000006715	ENSRNOG00000013949
ENSRNOG00000058087	ENSRNOG00000008165	ENSRNOG00000019680
ENSRNOG00000050251	ENSRNOG00000008904	ENSRNOG00000014508
ENSRNOG00000025676	ENSRNOG00000031536	ENSRNOG00000002773
ENSRNOG00000047714	ENSRNOG00000019100	ENSRNOG00000021719
ENSRNOG00000007839	ENSRNOG00000028390	ENSRNOG00000007905
ENSRNOG00000003841	ENSRNOG00000061376	ENSRNOG00000053086
ENSRNOG00000004890	ENSRNOG00000046829	ENSRNOG00000004232
ENSRNOG00000011907	ENSRNOG00000022432	ENSRNOG00000012303
ENSRNOG00000037838	ENSRNOG00000020953	ENSRNOG00000012486
ENSRNOG00000034290	ENSRNOG00000000658	ENSRNOG00000001795
ENSRNOG00000045913	ENSRNOG00000017311	ENSRNOG00000050404
ENSRNOG00000000017	ENSRNOG00000048433	ENSRNOG00000015878
ENSRNOG00000002238	ENSRNOG00000017063	ENSRNOG00000029543
ENSRNOG00000010497	ENSRNOG00000051619	ENSRNOG00000059857
ENSRNOG00000003494	ENSRNOG00000015618	ENSRNOG00000011498
ENSRNOG00000058856	ENSRNOG00000001158	ENSRNOG00000038784
ENSRNOG00000017197	ENSRNOG00000018254	ENSRNOG00000021013
ENSRNOG00000002593	ENSRNOG00000038746	ENSRNOG00000009822
ENSRNOG00000039865	ENSRNOG00000001216	ENSRNOG00000003800
ENSRNOG00000017428	ENSRNOG00000014202	ENSRNOG00000001959
ENSRNOG00000032626	ENSRNOG00000049351	ENSRNOG00000007457
ENSRNOG00000001389	ENSRNOG00000016724	ENSRNOG00000006231
ENSRNOG00000017625	ENSRNOG00000002610	ENSRNOG00000010058
ENSRNOG00000027739	ENSRNOG00000003442	ENSRNOG00000020369
ENSRNOG00000032002	ENSRNOG00000010386	ENSRNOG00000043416
ENSRNOG00000010375	ENSRNOG00000037409	ENSRNOG00000022839
ENSRNOG00000002916	ENSRNOG00000059207	ENSRNOG00000007286
ENSRNOG00000003687	ENSRNOG00000023536	ENSRNOG00000057458
ENSRNOG00000018257	ENSRNOG00000009445	ENSRNOG00000016708
ENSRNOG00000003300	ENSRNOG00000059900	ENSRNOG00000036839
ENSRNOG00000013437	ENSRNOG00000033256	ENSRNOG00000008447
ENSRNOG00000018454	ENSRNOG00000016372	ENSRNOG00000013005
ENSRNOG00000004322	ENSRNOG00000046133	ENSRNOG00000047781
ENSRNOG00000004198	ENSRNOG00000019336	ENSRNOG00000020173
ENSRNOG00000008086	ENSRNOG00000031431	ENSRNOG00000021441
ENSRNOG00000010447	ENSRNOG00000000479	ENSRNOG00000016888
ENSRNOG00000019181	ENSRNOG00000005818	ENSRNOG00000025302
ENSRNOG00000000442	ENSRNOG00000005575	ENSRNOG00000031993
ENSRNOG00000007364	ENSRNOG00000019752	ENSRNOG00000009552
ENSRNOG00000025691	ENSRNOG00000003209	ENSRNOG00000007431
ENSRNOG00000010883	ENSRNOG00000016123	ENSRNOG00000012294
ENSRNOG00000053430	ENSRNOG00000023803	ENSRNOG00000011490
ENSRNOG00000017539	ENSRNOG00000057760	ENSRNOG00000038789
ENSRNOG00000059510	ENSRNOG00000009822	ENSRNOG00000011969
ENSRNOG00000013133	ENSRNOG00000021433	ENSRNOG00000006946
ENSRNOG00000008869	ENSRNOG00000039183	ENSRNOG00000009522
ENSRNOG00000017109	ENSRNOG00000012438	ENSRNOG00000015211
ENSRNOG00000021243	ENSRNOG00000060356	ENSRNOG00000054251
ENSRNOG00000013683	ENSRNOG00000011541	ENSRNOG00000052070
ENSRNOG00000020407	ENSRNOG00000004772	ENSRNOG00000014615
ENSRNOG00000054049	ENSRNOG00000012083	ENSRNOG00000005392
ENSRNOG00000004448	ENSRNOG00000012804	ENSRNOG00000060021
ENSRNOG00000061544	ENSRNOG00000007030	ENSRNOG00000013742
ENSRNOG00000012495	ENSRNOG00000011820	ENSRNOG00000004861
ENSRNOG00000019549	ENSRNOG00000005659	ENSRNOG00000017226
ENSRNOG00000006357	ENSRNOG00000013000	ENSRNOG00000053037
ENSRNOG00000020942	ENSRNOG00000018517	ENSRNOG00000021670
ENSRNOG00000015253	ENSRNOG00000000515	ENSRNOG00000037647
ENSRNOG00000009033	ENSRNOG00000042741	ENSRNOG00000009149
ENSRNOG00000027357	ENSRNOG00000018740	ENSRNOG00000008091
ENSRNOG00000008048	ENSRNOG00000055966	ENSRNOG00000052574
ENSRNOG00000013707	ENSRNOG00000031643	ENSRNOG00000005934
ENSRNOG00000022256	ENSRNOG00000013747	ENSRNOG00000012534
ENSRNOG00000014231	ENSRNOG00000037199	ENSRNOG00000026108
ENSRNOG00000019365	ENSRNOG00000055111	ENSRNOG00000032516
ENSRNOG00000032150	ENSRNOG00000004322	ENSRNOG00000021161
ENSRNOG00000030776	ENSRNOG00000018551	ENSRNOG00000004440
ENSRNOG00000013532	ENSRNOG00000001757	ENSRNOG00000053362
ENSRNOG00000007896	ENSRNOG00000014874	ENSRNOG00000019208
ENSRNOG00000019363	ENSRNOG00000058539	ENSRNOG00000033736
ENSRNOG00000042312	ENSRNOG00000050378	ENSRNOG00000021548
ENSRNOG00000042480	ENSRNOG00000039204	ENSRNOG00000020906
ENSRNOG00000004019	ENSRNOG00000046184	ENSRNOG00000060949
ENSRNOG00000056826	ENSRNOG00000029938	ENSRNOG00000010248
ENSRNOG00000042821	ENSRNOG00000007142	ENSRNOG00000011526
ENSRNOG00000011245	ENSRNOG00000013683	ENSRNOG00000016271
ENSRNOG00000016863	ENSRNOG00000032929	ENSRNOG00000001833
ENSRNOG00000018755	ENSRNOG00000049410	ENSRNOG00000030285
ENSRNOG00000011521	ENSRNOG00000000251	ENSRNOG00000010832
ENSRNOG00000001431	ENSRNOG00000047854	ENSRNOG00000010253
ENSRNOG00000029698	ENSRNOG00000006224	ENSRNOG00000016838
ENSRNOG00000032396	ENSRNOG00000021468	ENSRNOG00000059140
ENSRNOG00000020136	ENSRNOG00000024677	ENSRNOG00000022565
ENSRNOG00000017250	ENSRNOG00000012067	ENSRNOG00000005404
ENSRNOG00000027859	ENSRNOG00000022764	ENSRNOG00000020030
ENSRNOG00000023312	ENSRNOG00000008180	ENSRNOG00000038140
ENSRNOG00000009870	ENSRNOG00000032703	ENSRNOG00000028992
ENSRNOG00000006320	ENSRNOG00000014232	ENSRNOG00000039284
ENSRNOG00000020446	ENSRNOG00000015717	ENSRNOG00000057759
ENSRNOG00000002385	ENSRNOG00000023162	ENSRNOG00000005153
ENSRNOG00000007951	ENSRNOG00000042825	ENSRNOG00000003207
ENSRNOG00000011800	ENSRNOG00000009211	ENSRNOG00000011977
ENSRNOG00000051158	ENSRNOG00000010325	ENSRNOG00000032339
ENSRNOG00000033722	ENSRNOG00000015093	ENSRNOG00000006661
ENSRNOG00000016581	ENSRNOG00000056457	ENSRNOG00000008942
ENSRNOG00000029342	ENSRNOG00000003866	ENSRNOG00000002667
ENSRNOG00000019048	ENSRNOG00000018092	ENSRNOG00000022356
ENSRNOG00000014691	ENSRNOG00000001259	ENSRNOG00000003673
ENSRNOG00000026295	ENSRNOG00000015529	ENSRNOG00000000443
ENSRNOG00000038319	ENSRNOG00000048449	ENSRNOG00000002579
ENSRNOG00000046858	ENSRNOG00000000894	ENSRNOG00000000412
ENSRNOG00000004589	ENSRNOG00000000373	ENSRNOG00000010392
ENSRNOG00000009222	ENSRNOG00000014538	ENSRNOG00000001715
ENSRNOG00000023338	ENSRNOG00000039390	ENSRNOG00000004409
ENSRNOG00000028801	ENSRNOG00000006167	ENSRNOG00000024931
ENSRNOG00000031851	ENSRNOG00000033134	ENSRNOG00000001457
ENSRNOG00000008615	ENSRNOG00000051002	ENSRNOG00000009263
ENSRNOG00000000378	ENSRNOG00000019110	ENSRNOG00000052391
ENSRNOG00000048924	ENSRNOG00000012058	ENSRNOG00000011964
ENSRNOG00000036960	ENSRNOG00000008570	ENSRNOG00000005807
ENSRNOG00000039593	ENSRNOG00000046050	ENSRNOG00000002053
ENSRNOG00000004736	ENSRNOG00000001518	ENSRNOG00000061595
ENSRNOG00000014948	ENSRNOG00000024650	ENSRNOG00000033064
ENSRNOG00000007229	ENSRNOG00000028566	ENSRNOG00000031916
ENSRNOG00000030486	ENSRNOG00000017619	ENSRNOG00000028945
ENSRNOG00000050792	ENSRNOG00000011683	ENSRNOG00000032487
ENSRNOG00000021084	ENSRNOG00000013503	ENSRNOG00000008045
ENSRNOG00000014233	ENSRNOG00000000569	ENSRNOG00000019627
ENSRNOG00000013072	ENSRNOG00000014130	ENSRNOG00000057556
ENSRNOG00000000547	ENSRNOG00000015002	ENSRNOG00000051548
ENSRNOG00000004110	ENSRNOG00000015982	ENSRNOG00000006921
ENSRNOG00000006231	ENSRNOG00000018382	ENSRNOG00000053026
ENSRNOG00000016242	ENSRNOG00000010045	ENSRNOG00000023536
ENSRNOG00000007350	ENSRNOG00000029768	ENSRNOG00000024677
ENSRNOG00000011145	ENSRNOG00000021847	ENSRNOG00000054080
ENSRNOG00000033970	ENSRNOG00000031706	ENSRNOG00000056359
ENSRNOG00000052188	ENSRNOG00000057189	ENSRNOG00000007159
ENSRNOG00000016496	ENSRNOG00000006952	ENSRNOG00000023587
ENSRNOG00000021004	ENSRNOG00000009260	ENSRNOG00000016878
ENSRNOG00000023861	ENSRNOG00000017560	ENSRNOG00000008465
ENSRNOG00000020953	ENSRNOG00000042970	ENSRNOG00000008481
ENSRNOG00000031443	ENSRNOG00000011562	ENSRNOG00000018566
ENSRNOG00000014874	ENSRNOG00000019048	ENSRNOG00000020006
ENSRNOG00000018509	ENSRNOG00000010906	ENSRNOG00000003973
ENSRNOG00000018094	ENSRNOG00000007906	ENSRNOG00000016148
ENSRNOG00000002460	ENSRNOG00000031443	ENSRNOG00000061403
ENSRNOG00000026226	ENSRNOG00000005214	ENSRNOG00000033528
ENSRNOG00000037198	ENSRNOG00000009826	ENSRNOG00000000818
ENSRNOG00000007540	ENSRNOG00000004479	ENSRNOG00000054344
ENSRNOG00000021669	ENSRNOG00000013057	ENSRNOG00000021157
ENSRNOG00000009005	ENSRNOG00000020525	ENSRNOG00000000142
ENSRNOG00000013318	ENSRNOG00000000500	ENSRNOG00000010238
ENSRNOG00000004483	ENSRNOG00000019365	ENSRNOG00000014241
ENSRNOG00000046007	ENSRNOG00000049491	ENSRNOG00000006236
ENSRNOG00000006741	ENSRNOG00000054964	ENSRNOG00000011513
ENSRNOG00000014653	ENSRNOG00000022911	ENSRNOG00000013564
ENSRNOG00000027445	ENSRNOG00000053026	ENSRNOG00000023360
ENSRNOG00000003515	ENSRNOG00000045998	ENSRNOG00000019890
ENSRNOG00000006841	ENSRNOG00000023109	ENSRNOG00000018231
ENSRNOG00000059073	ENSRNOG00000008930	ENSRNOG00000008364
ENSRNOG00000004540	ENSRNOG00000000239	ENSRNOG00000002105
ENSRNOG00000004964	ENSRNOG00000004101	ENSRNOG00000005907
ENSRNOG00000038999	ENSRNOG00000036728	ENSRNOG00000007665
ENSRNOG00000061868	ENSRNOG00000017206	ENSRNOG00000000699
ENSRNOG00000004781	ENSRNOG00000024428	ENSRNOG00000056226
ENSRNOG00000059660	ENSRNOG00000004679	ENSRNOG00000032989
ENSRNOG00000016177	ENSRNOG00000061070	ENSRNOG00000033791
ENSRNOG00000001757	ENSRNOG00000029308	ENSRNOG00000046848
ENSRNOG00000061857	ENSRNOG00000030467	ENSRNOG00000004660
ENSRNOG00000018715	ENSRNOG00000011777	ENSRNOG00000010319
ENSRNOG00000021130	ENSRNOG00000009334	ENSRNOG00000004890
ENSRNOG00000000552	ENSRNOG00000015260	ENSRNOG00000000551
ENSRNOG00000032208	ENSRNOG00000004575	ENSRNOG00000017550
ENSRNOG00000004275	ENSRNOG00000050675	ENSRNOG00000021644
ENSRNOG00000013167	ENSRNOG00000011688	ENSRNOG00000017156
ENSRNOG00000007256	ENSRNOG00000027736	ENSRNOG00000002794
ENSRNOG00000018752	ENSRNOG00000015380	ENSRNOG00000002153
ENSRNOG00000019445	ENSRNOG00000012422	ENSRNOG00000013694
ENSRNOG00000026344	ENSRNOG00000021589	ENSRNOG00000006715
ENSRNOG00000015717	ENSRNOG00000028259	ENSRNOG00000006926
ENSRNOG00000013962	ENSRNOG00000009951	ENSRNOG00000036829
ENSRNOG00000022298	ENSRNOG00000029191	ENSRNOG00000009266
ENSRNOG00000000658	ENSRNOG00000016525	ENSRNOG00000001557
ENSRNOG00000004089	ENSRNOG00000002278	ENSRNOG00000003256
ENSRNOG00000050378	ENSRNOG00000001217	ENSRNOG00000015904
ENSRNOG00000017072	ENSRNOG00000055527	ENSRNOG00000017777
ENSRNOG00000010326	ENSRNOG00000002947	ENSRNOG00000005788
ENSRNOG00000002072	ENSRNOG00000019620	ENSRNOG00000040108
ENSRNOG00000021098	ENSRNOG00000049878	ENSRNOG00000005378
ENSRNOG00000029598	ENSRNOG00000002273	ENSRNOG00000033776
ENSRNOG00000033564	ENSRNOG00000029876	ENSRNOG00000004662
ENSRNOG00000023209	ENSRNOG00000013309	ENSRNOG00000050869
ENSRNOG00000024114	ENSRNOG00000011205	ENSRNOG00000024043
ENSRNOG00000016716	ENSRNOG00000005810	ENSRNOG00000057058
ENSRNOG00000010266	ENSRNOG00000009401	ENSRNOG00000024266
ENSRNOG00000029876	ENSRNOG00000012749	ENSRNOG00000003611
ENSRNOG00000017484	ENSRNOG00000018815	ENSRNOG00000028225
ENSRNOG00000017395	ENSRNOG00000059827	ENSRNOG00000028611
ENSRNOG00000014496	ENSRNOG00000021098	ENSRNOG00000012658
ENSRNOG00000002922	ENSRNOG00000010378	ENSRNOG00000015255
ENSRNOG00000021157	ENSRNOG00000019412	ENSRNOG00000021469
ENSRNOG00000001518	ENSRNOG00000015253	ENSRNOG00000046788
ENSRNOG00000006224	ENSRNOG00000022419	ENSRNOG00000036960
ENSRNOG00000047230	ENSRNOG00000016225	ENSRNOG00000010034
ENSRNOG00000012779	ENSRNOG00000050996	ENSRNOG00000019278
ENSRNOG00000056226	ENSRNOG00000004660	ENSRNOG00000021128
ENSRNOG00000003748	ENSRNOG00000043199	ENSRNOG00000019404
ENSRNOG00000008855	ENSRNOG00000002950	ENSRNOG00000054765
ENSRNOG00000033940	ENSRNOG00000003388	ENSRNOG00000005410
ENSRNOG00000049695	ENSRNOG00000020875	ENSRNOG00000009935
ENSRNOG00000006076	ENSRNOG00000013727	ENSRNOG00000037225
ENSRNOG00000016301	ENSRNOG00000006932	ENSRNOG00000030034
ENSRNOG00000018028	ENSRNOG00000003479	ENSRNOG00000017197
ENSRNOG00000004854	ENSRNOG00000011107	ENSRNOG00000001501
ENSRNOG00000043085	ENSRNOG00000010777	ENSRNOG00000001580
ENSRNOG00000038616	ENSRNOG00000022637	ENSRNOG00000011205
ENSRNOG00000017019	ENSRNOG00000061910	ENSRNOG00000033280
ENSRNOG00000000588	ENSRNOG00000039744	ENSRNOG00000001134
ENSRNOG00000056894	ENSRNOG00000027894	ENSRNOG00000025587
ENSRNOG00000017773	ENSRNOG00000052498	ENSRNOG00000009872
ENSRNOG00000011696	ENSRNOG00000007159	ENSRNOG00000021100
ENSRNOG00000017277	ENSRNOG00000000383	ENSRNOG00000028930
ENSRNOG00000032708	ENSRNOG00000013663	ENSRNOG00000012422
ENSRNOG00000011205	ENSRNOG00000017511	ENSRNOG00000058983
ENSRNOG00000019850	ENSRNOG00000004133	ENSRNOG00000030351
ENSRNOG00000000815	ENSRNOG00000020807	ENSRNOG00000013474
ENSRNOG00000010994	ENSRNOG00000002593	ENSRNOG00000001276
ENSRNOG00000021100	ENSRNOG00000022298	ENSRNOG00000004322
ENSRNOG00000005465	ENSRNOG00000016945	ENSRNOG00000036687
ENSRNOG00000024843	ENSRNOG00000017021	ENSRNOG00000020013
ENSRNOG00000000487	ENSRNOG00000015308	ENSRNOG00000023720
ENSRNOG00000033445	ENSRNOG00000049115	ENSRNOG00000021536
ENSRNOG00000014886	ENSRNOG00000012436	ENSRNOG00000006619
ENSRNOG00000028733	ENSRNOG00000018760	ENSRNOG00000004517
ENSRNOG00000004752	ENSRNOG00000061895	ENSRNOG00000016163
ENSRNOG00000001580	ENSRNOG00000001908	ENSRNOG00000001111
ENSRNOG00000026653	ENSRNOG00000017539	ENSRNOG00000039949
ENSRNOG00000017319	ENSRNOG00000011284	ENSRNOG00000021840
ENSRNOG00000004377	ENSRNOG00000060100	ENSRNOG00000011593
ENSRNOG00000021752	ENSRNOG00000042753	ENSRNOG00000050378
ENSRNOG00000006814	ENSRNOG00000033564	ENSRNOG00000017786
ENSRNOG00000010763	ENSRNOG00000002428	ENSRNOG00000016978
ENSRNOG00000010661	ENSRNOG00000018603	ENSRNOG00000006324
ENSRNOG00000015071	ENSRNOG00000008880	ENSRNOG00000009323
ENSRNOG00000021474	ENSRNOG00000003259	ENSRNOG00000052873
ENSRNOG00000023628	ENSRNOG00000047046	ENSRNOG00000017919
ENSRNOG00000003802	ENSRNOG00000009339	ENSRNOG00000046479
ENSRNOG00000042741	ENSRNOG00000018669	ENSRNOG00000055648
ENSRNOG00000001378	ENSRNOG00000018454	ENSRNOG00000017767
ENSRNOG00000017680	ENSRNOG00000032472	ENSRNOG00000008966
ENSRNOG00000015736	ENSRNOG00000012294	ENSRNOG00000030187
ENSRNOG00000050425	ENSRNOG00000012989	ENSRNOG00000049115
ENSRNOG00000011820	ENSRNOG00000005082	ENSRNOG00000017359
ENSRNOG00000009370	ENSRNOG00000006198	ENSRNOG00000010694
ENSRNOG00000061630	ENSRNOG00000033693	ENSRNOG00000013922
ENSRNOG00000045733	ENSRNOG00000004483	ENSRNOG00000006334
ENSRNOG00000019560	ENSRNOG00000014610	ENSRNOG00000015948
ENSRNOG00000023005	ENSRNOG00000028743	ENSRNOG00000037295
ENSRNOG00000000168	ENSRNOG00000000257	ENSRNOG00000048725
ENSRNOG00000020173	ENSRNOG00000004232	ENSRNOG00000007654
ENSRNOG00000013128	ENSRNOG00000050819	ENSRNOG00000000866
ENSRNOG00000019728	ENSRNOG00000029195	ENSRNOG00000003587
ENSRNOG00000056714	ENSRNOG00000054860	ENSRNOG00000016066
ENSRNOG00000016945	ENSRNOG00000005037	ENSRNOG00000009892
ENSRNOG00000020845	ENSRNOG00000033017	ENSRNOG00000058337
ENSRNOG00000061403	ENSRNOG00000007896	ENSRNOG00000017575
ENSRNOG00000021272	ENSRNOG00000056944	ENSRNOG00000008841
ENSRNOG00000017850	ENSRNOG00000028137	ENSRNOG00000023312
ENSRNOG00000010999	ENSRNOG00000048472	ENSRNOG00000013973
ENSRNOG00000017063	ENSRNOG00000018257	ENSRNOG00000014143
ENSRNOG00000020097	ENSRNOG00000017819	ENSRNOG00000058784
ENSRNOG00000060633	ENSRNOG00000015921	ENSRNOG00000008846
ENSRNOG00000024043	ENSRNOG00000036692	ENSRNOG00000059073
ENSRNOG00000011161	ENSRNOG00000002134	ENSRNOG00000001431
ENSRNOG00000059625	ENSRNOG00000009005	ENSRNOG00000029082
ENSRNOG00000056746	ENSRNOG00000058087	ENSRNOG00000037514
ENSRNOG00000015232	ENSRNOG00000038835	ENSRNOG00000011562
ENSRNOG00000015002	ENSRNOG00000023337	ENSRNOG00000002459
ENSRNOG00000004311	ENSRNOG00000006019	ENSRNOG00000018217
ENSRNOG00000034089	ENSRNOG00000000168	ENSRNOG00000007682
ENSRNOG00000004440	ENSRNOG00000029510	ENSRNOG00000008012
ENSRNOG00000022704	ENSRNOG00000056359	ENSRNOG00000004473
ENSRNOG00000037632	ENSRNOG00000039571	ENSRNOG00000061358
ENSRNOG00000018839	ENSRNOG00000025676	ENSRNOG00000010748
ENSRNOG00000028891	ENSRNOG00000006204	ENSRNOG00000021560
ENSRNOG00000023148	ENSRNOG00000010575	ENSRNOG00000060105
ENSRNOG00000015024	ENSRNOG00000016679	ENSRNOG00000047218
ENSRNOG00000001216	ENSRNOG00000060703	ENSRNOG00000054560
ENSRNOG00000013654	ENSRNOG00000013515	ENSRNOG00000016326
ENSRNOG00000020685	ENSRNOG00000059510	ENSRNOG00000060528
ENSRNOG00000043068	ENSRNOG00000014248	ENSRNOG00000009726
ENSRNOG00000004610	ENSRNOG00000042460	ENSRNOG00000009311
ENSRNOG00000031136	ENSRNOG00000021255	ENSRNOG00000029861
ENSRNOG00000017414	ENSRNOG00000051258	ENSRNOG00000050430
ENSRNOG00000008412	ENSRNOG00000004649	ENSRNOG00000046184
ENSRNOG00000033923	ENSRNOG00000049349	ENSRNOG00000015353
ENSRNOG00000005404	ENSRNOG00000033220	ENSRNOG00000033772
ENSRNOG00000032844	ENSRNOG00000005391	ENSRNOG00000019229
ENSRNOG00000013503	ENSRNOG00000003969	ENSRNOG00000046547
ENSRNOG00000028189	ENSRNOG00000015406	ENSRNOG00000028801
ENSRNOG00000016070	ENSRNOG00000013867	ENSRNOG00000005053
ENSRNOG00000023337	ENSRNOG00000004972	ENSRNOG00000002653
ENSRNOG00000056359	ENSRNOG00000060524	ENSRNOG00000021272
ENSRNOG00000047023	ENSRNOG00000012512	ENSRNOG00000005149
ENSRNOG00000011208	ENSRNOG00000027808	ENSRNOG00000033893
ENSRNOG00000013279	ENSRNOG00000019926	ENSRNOG00000013411
ENSRNOG00000011300	ENSRNOG00000056894	ENSRNOG00000003522
ENSRNOG00000054251	ENSRNOG00000014080	ENSRNOG00000050233
ENSRNOG00000018760	ENSRNOG00000061215	ENSRNOG00000007512
ENSRNOG00000052070	ENSRNOG00000000394	ENSRNOG00000004147
ENSRNOG00000061215	ENSRNOG00000019737	ENSRNOG00000010478
ENSRNOG00000027630	ENSRNOG00000015275	ENSRNOG00000030930
ENSRNOG00000047491	ENSRNOG00000024120	ENSRNOG00000001128
ENSRNOG00000059949	ENSRNOG00000030486	ENSRNOG00000013148
ENSRNOG00000017684	ENSRNOG00000051163	ENSRNOG00000016123
ENSRNOG00000005391	ENSRNOG00000060523	ENSRNOG00000053232
ENSRNOG00000007993	ENSRNOG00000001825	ENSRNOG00000033570
ENSRNOG00000019869	ENSRNOG00000018297	ENSRNOG00000008173
ENSRNOG00000060460	ENSRNOG00000021345	ENSRNOG00000033220
ENSRNOG00000055564	ENSRNOG00000060949	ENSRNOG00000028677
ENSRNOG00000050767	ENSRNOG00000000563	ENSRNOG00000017188
ENSRNOG00000058337	ENSRNOG00000001389	ENSRNOG00000007918
ENSRNOG00000005807	ENSRNOG00000019141	ENSRNOG00000014713
ENSRNOG00000033017	ENSRNOG00000058446	ENSRNOG00000006956
ENSRNOG00000003622	ENSRNOG00000014886	ENSRNOG00000025625
ENSRNOG00000016544	ENSRNOG00000043085	ENSRNOG00000012782
ENSRNOG00000010942	ENSRNOG00000046763	ENSRNOG00000016225
ENSRNOG00000054795	ENSRNOG00000008027	ENSRNOG00000020701
ENSRNOG00000007545	ENSRNOG00000053691	ENSRNOG00000042139
ENSRNOG00000023428	ENSRNOG00000015616	ENSRNOG00000002203
ENSRNOG00000026134	ENSRNOG00000048088	ENSRNOG00000048472
ENSRNOG00000010853	ENSRNOG00000046195	ENSRNOG00000004420
ENSRNOG00000019620	ENSRNOG00000012318	ENSRNOG00000013589
ENSRNOG00000052190	ENSRNOG00000017019	ENSRNOG00000020452
ENSRNOG00000009826	ENSRNOG00000000787	ENSRNOG00000007426
ENSRNOG00000005723	ENSRNOG00000014837	ENSRNOG00000014656
ENSRNOG00000013867	ENSRNOG00000022499	ENSRNOG00000014703
ENSRNOG00000004155	ENSRNOG00000003947	ENSRNOG00000007923
ENSRNOG00000021771	ENSRNOG00000012183	ENSRNOG00000017684
ENSRNOG00000005008	ENSRNOG00000025587	ENSRNOG00000022030
ENSRNOG00000000321	ENSRNOG00000017073	ENSRNOG00000008489
ENSRNOG00000030771	ENSRNOG00000019549	ENSRNOG00000003464
ENSRNOG00000046184	ENSRNOG00000003144	ENSRNOG00000051307
ENSRNOG00000008591	ENSRNOG00000053260	ENSRNOG00000015796
ENSRNOG00000003522	ENSRNOG00000006934	ENSRNOG00000020105
ENSRNOG00000061508	ENSRNOG00000007827	ENSRNOG00000047174
ENSRNOG00000024923	ENSRNOG00000012827	ENSRNOG00000053288
ENSRNOG00000022155	ENSRNOG00000051216	ENSRNOG00000052038
ENSRNOG00000057141	ENSRNOG00000048771	ENSRNOG00000017581
ENSRNOG00000037435	ENSRNOG00000053113	ENSRNOG00000001687
ENSRNOG00000022988	ENSRNOG00000015794	ENSRNOG00000008565
ENSRNOG00000025981	ENSRNOG00000003835	ENSRNOG00000001816
ENSRNOG00000024065	ENSRNOG00000056550	ENSRNOG00000012721
ENSRNOG00000017912	ENSRNOG00000059625	ENSRNOG00000024159
ENSRNOG00000059207	ENSRNOG00000001187	ENSRNOG00000010999
ENSRNOG00000033064	ENSRNOG00000016640	ENSRNOG00000039390
ENSRNOG00000009197	ENSRNOG00000020013	ENSRNOG00000000853
ENSRNOG00000007827	ENSRNOG00000013231	ENSRNOG00000052887
ENSRNOG00000051285	ENSRNOG00000032002	ENSRNOG00000013304
ENSRNOG00000004158	ENSRNOG00000022712	ENSRNOG00000010397
ENSRNOG00000038881	ENSRNOG00000006075	ENSRNOG00000014513
ENSRNOG00000059997	ENSRNOG00000028768	ENSRNOG00000003832
ENSRNOG00000016302	ENSRNOG00000054548	ENSRNOG00000001752
ENSRNOG00000017438	ENSRNOG00000059097	ENSRNOG00000006934
ENSRNOG00000021199	ENSRNOG00000010763	ENSRNOG00000026134
ENSRNOG00000021255	ENSRNOG00000021474	ENSRNOG00000012674
ENSRNOG00000023809	ENSRNOG00000004699	ENSRNOG00000011039
ENSRNOG00000020836	ENSRNOG00000007706	ENSRNOG00000011154
ENSRNOG00000054438	ENSRNOG00000020441	ENSRNOG00000008144
ENSRNOG00000004870	ENSRNOG00000060528	ENSRNOG00000010266
ENSRNOG00000052887	ENSRNOG00000020505	ENSRNOG00000003123
ENSRNOG00000029107	ENSRNOG00000003251	ENSRNOG00000010507
ENSRNOG00000017024	ENSRNOG00000003217	ENSRNOG00000016013
ENSRNOG00000052757	ENSRNOG00000014705	ENSRNOG00000004263
ENSRNOG00000045764	ENSRNOG00000010071	ENSRNOG00000048660
ENSRNOG00000060391	ENSRNOG00000020129	ENSRNOG00000013987
ENSRNOG00000003756	ENSRNOG00000019622	ENSRNOG00000032396
ENSRNOG00000028259	ENSRNOG00000013415	ENSRNOG00000056246
ENSRNOG00000008465	ENSRNOG00000047174	ENSRNOG00000036677
ENSRNOG00000019495	ENSRNOG00000001627	ENSRNOG00000012827
ENSRNOG00000026679	ENSRNOG00000001869	ENSRNOG00000014524
ENSRNOG00000019890	ENSRNOG00000061394	ENSRNOG00000008129
ENSRNOG00000003284	ENSRNOG00000023312	ENSRNOG00000006108
ENSRNOG00000048898	ENSRNOG00000058545	ENSRNOG00000027859
ENSRNOG00000017403	ENSRNOG00000061595	ENSRNOG00000025892
ENSRNOG00000012956	ENSRNOG00000020407	ENSRNOG00000014549
ENSRNOG00000058195	ENSRNOG00000024178	ENSRNOG00000004040
ENSRNOG00000007918	ENSRNOG00000058993	ENSRNOG00000008825
ENSRNOG00000014505	ENSRNOG00000019494	ENSRNOG00000028016
ENSRNOG00000008575	ENSRNOG00000027630	ENSRNOG00000032618
ENSRNOG00000009425	ENSRNOG00000014573	ENSRNOG00000009639
ENSRNOG00000003144	ENSRNOG00000057141	ENSRNOG00000009867
ENSRNOG00000021802	ENSRNOG00000032178	ENSRNOG00000016413
ENSRNOG00000019019	ENSRNOG00000050910	ENSRNOG00000000122
ENSRNOG00000049192	ENSRNOG00000046667	ENSRNOG00000030568
ENSRNOG00000009772	ENSRNOG00000061379	ENSRNOG00000059276
ENSRNOG00000045992	ENSRNOG00000006731	ENSRNOG00000010620
ENSRNOG00000010777	ENSRNOG00000059765	ENSRNOG00000032788
ENSRNOG00000010450	ENSRNOG00000023093	ENSRNOG00000031163
ENSRNOG00000002592	ENSRNOG00000001912	ENSRNOG00000036608
ENSRNOG00000002085	ENSRNOG00000043176	ENSRNOG00000021412
ENSRNOG00000020441	ENSRNOG00000007372	ENSRNOG00000020078
ENSRNOG00000024390	ENSRNOG00000005038	ENSRNOG00000005620
ENSRNOG00000008570	ENSRNOG00000000811	ENSRNOG00000009260
ENSRNOG00000037710	ENSRNOG00000025094	ENSRNOG00000051623
ENSRNOG00000048874	ENSRNOG00000017828	ENSRNOG00000018092
ENSRNOG00000047800	ENSRNOG00000000572	ENSRNOG00000005177
ENSRNOG00000049770	ENSRNOG00000017897	ENSRNOG00000019977
ENSRNOG00000018938	ENSRNOG00000009772	ENSRNOG00000005274
ENSRNOG00000019689	ENSRNOG00000015184	ENSRNOG00000013898
ENSRNOG00000015599	ENSRNOG00000006591	ENSRNOG00000008956
ENSRNOG00000053272	ENSRNOG00000050968	ENSRNOG00000023410
ENSRNOG00000011634	ENSRNOG00000008947	ENSRNOG00000022681
ENSRNOG00000036608	ENSRNOG00000039856	ENSRNOG00000007345
ENSRNOG00000039107	ENSRNOG00000024390	ENSRNOG00000002012
ENSRNOG00000024730	ENSRNOG00000006641	ENSRNOG00000032659
ENSRNOG00000003066	ENSRNOG00000007457	ENSRNOG00000015685
ENSRNOG00000007345	ENSRNOG00000016242	ENSRNOG00000006541
ENSRNOG00000049513	ENSRNOG00000013069	ENSRNOG00000014634
ENSRNOG00000054218	ENSRNOG00000058827	ENSRNOG00000001647
ENSRNOG00000008046	ENSRNOG00000008046	ENSRNOG00000010747
ENSRNOG00000033744	ENSRNOG00000007951	ENSRNOG00000033217
ENSRNOG00000024931	ENSRNOG00000010731	ENSRNOG00000010071
ENSRNOG00000008045	ENSRNOG00000042944	ENSRNOG00000000815
ENSRNOG00000009848	ENSRNOG00000047491	ENSRNOG00000002618
ENSRNOG00000054136	ENSRNOG00000003694	ENSRNOG00000018615
ENSRNOG00000000488	ENSRNOG00000020743	ENSRNOG00000006357
ENSRNOG00000061379	ENSRNOG00000015411	ENSRNOG00000019390
ENSRNOG00000030729	ENSRNOG00000033217	ENSRNOG00000012324
ENSRNOG00000006715	ENSRNOG00000008099	ENSRNOG00000046191
ENSRNOG00000007147	ENSRNOG00000012471	ENSRNOG00000046492
ENSRNOG00000039110	ENSRNOG00000022426	ENSRNOG00000019203
ENSRNOG00000005037	ENSRNOG00000060087	ENSRNOG00000002947
ENSRNOG00000049766	ENSRNOG00000005046	ENSRNOG00000016278
ENSRNOG00000010018	ENSRNOG00000059456	ENSRNOG00000046153
ENSRNOG00000023551	ENSRNOG00000039582	ENSRNOG00000008961
ENSRNOG00000057696	ENSRNOG00000018778	ENSRNOG00000024213
ENSRNOG00000018382	ENSRNOG00000059500	ENSRNOG00000004610
ENSRNOG00000008065	ENSRNOG00000009047	ENSRNOG00000010320
ENSRNOG00000056716	ENSRNOG00000025981	ENSRNOG00000050697
ENSRNOG00000000860	ENSRNOG00000016479	ENSRNOG00000023101
ENSRNOG00000015329	ENSRNOG00000018858	ENSRNOG00000001250
ENSRNOG00000001288	ENSRNOG00000026466	ENSRNOG00000003084
ENSRNOG00000005215	ENSRNOG00000030729	ENSRNOG00000023708
ENSRNOG00000021469	ENSRNOG00000013408	ENSRNOG00000003476
ENSRNOG00000020860	ENSRNOG00000005018	ENSRNOG00000014125
ENSRNOG00000009331	ENSRNOG00000017680	ENSRNOG00000017468
ENSRNOG00000003694	ENSRNOG00000047230	ENSRNOG00000019689
ENSRNOG00000032832	ENSRNOG00000015449	ENSRNOG00000019361
ENSRNOG00000017511	ENSRNOG00000002599	ENSRNOG00000010516
ENSRNOG00000019306	ENSRNOG00000004890	ENSRNOG00000016700
ENSRNOG00000061530	ENSRNOG00000050419	ENSRNOG00000014409
ENSRNOG00000000636	ENSRNOG00000027880	ENSRNOG00000016249
ENSRNOG00000002773	ENSRNOG00000006738	ENSRNOG00000046327
ENSRNOG00000026203	ENSRNOG00000000321	ENSRNOG00000021179
ENSRNOG00000003866	ENSRNOG00000054033	ENSRNOG00000029308
ENSRNOG00000026493	ENSRNOG00000006741	ENSRNOG00000004583
ENSRNOG00000026770	ENSRNOG00000015382	ENSRNOG00000059968
ENSRNOG00000003931	ENSRNOG00000025143	ENSRNOG00000019080
ENSRNOG00000001959	ENSRNOG00000048389	ENSRNOG00000002832
ENSRNOG00000010731	ENSRNOG00000028801	ENSRNOG00000011944
ENSRNOG00000015810	ENSRNOG00000007764	ENSRNOG00000021248
ENSRNOG00000024077	ENSRNOG00000002014	ENSRNOG00000004332
ENSRNOG00000047046	ENSRNOG00000000525	ENSRNOG00000042230
ENSRNOG00000015982	ENSRNOG00000026518	ENSRNOG00000007331
ENSRNOG00000050485	ENSRNOG00000006978	ENSRNOG00000047023
ENSRNOG00000025587	ENSRNOG00000025406	ENSRNOG00000026605
ENSRNOG00000029980	ENSRNOG00000007925	ENSRNOG00000001217
ENSRNOG00000060867	ENSRNOG00000027468	ENSRNOG00000003616
ENSRNOG00000000920	ENSRNOG00000001653	ENSRNOG00000028207
ENSRNOG00000006030	ENSRNOG00000002469	ENSRNOG00000008758
ENSRNOG00000003170	ENSRNOG00000004275	ENSRNOG00000004819
ENSRNOG00000025143	ENSRNOG00000019662	ENSRNOG00000027606
ENSRNOG00000029938	ENSRNOG00000013294	ENSRNOG00000008030
ENSRNOG00000000394	ENSRNOG00000017181	ENSRNOG00000012735
ENSRNOG00000021433	ENSRNOG00000015071	ENSRNOG00000049614
ENSRNOG00000047505	ENSRNOG00000004861	ENSRNOG00000013027
ENSRNOG00000007189	ENSRNOG00000038771	ENSRNOG00000005287
ENSRNOG00000046949	ENSRNOG00000000768	ENSRNOG00000022320
ENSRNOG00000025930	ENSRNOG00000020644	ENSRNOG00000027360
ENSRNOG00000038835	ENSRNOG00000010507	ENSRNOG00000026163
ENSRNOG00000057082	ENSRNOG00000010047	ENSRNOG00000027109
ENSRNOG00000049425	ENSRNOG00000006824	ENSRNOG00000012956
ENSRNOG00000001963	ENSRNOG00000019937	ENSRNOG00000003785
ENSRNOG00000009662	ENSRNOG00000005565	ENSRNOG00000018198
ENSRNOG00000020077	ENSRNOG00000010447	ENSRNOG00000007779
ENSRNOG00000000589	ENSRNOG00000019308	ENSRNOG00000014691
ENSRNOG00000051147	ENSRNOG00000000443	ENSRNOG00000020249
ENSRNOG00000059698	ENSRNOG00000020097	ENSRNOG00000023109
ENSRNOG00000016123	ENSRNOG00000003486	ENSRNOG00000027229
ENSRNOG00000007625	ENSRNOG00000011120	ENSRNOG00000021170
ENSRNOG00000014761	ENSRNOG00000003785	ENSRNOG00000047898
ENSRNOG00000010906	ENSRNOG00000019050	ENSRNOG00000030449
ENSRNOG00000016248	ENSRNOG00000004461	ENSRNOG00000004216
ENSRNOG00000001006	ENSRNOG00000015878	ENSRNOG00000012495
ENSRNOG00000020203	ENSRNOG00000042411	ENSRNOG00000049452
ENSRNOG00000018782	ENSRNOG00000004712	ENSRNOG00000003726
ENSRNOG00000032328	ENSRNOG00000047023	ENSRNOG00000005024
ENSRNOG00000033059	ENSRNOG00000025198	ENSRNOG00000008180
ENSRNOG00000046663	ENSRNOG00000002345	ENSRNOG00000022622
ENSRNOG00000006645	ENSRNOG00000052190	ENSRNOG00000050910
ENSRNOG00000015465	ENSRNOG00000033722	ENSRNOG00000016665
ENSRNOG00000059459	ENSRNOG00000016544	ENSRNOG00000017421
ENSRNOG00000059041	ENSRNOG00000028895	ENSRNOG00000022537
ENSRNOG00000016148	ENSRNOG00000007839	ENSRNOG00000016695
ENSRNOG00000034075	ENSRNOG00000020908	ENSRNOG00000031443
ENSRNOG00000046667	ENSRNOG00000049994	ENSRNOG00000018254
ENSRNOG00000026466	ENSRNOG00000017109	ENSRNOG00000009173
ENSRNOG00000022975	ENSRNOG00000042230	ENSRNOG00000025238
ENSRNOG00000024159	ENSRNOG00000000528	ENSRNOG00000058434
ENSRNOG00000046231	ENSRNOG00000000487	ENSRNOG00000009385
ENSRNOG00000010047	ENSRNOG00000022107	ENSRNOG00000038200
ENSRNOG00000008666	ENSRNOG00000019615	ENSRNOG00000013971
ENSRNOG00000048166	ENSRNOG00000059927	ENSRNOG00000003929
ENSRNOG00000050996	ENSRNOG00000012119	ENSRNOG00000049782
ENSRNOG00000061160	ENSRNOG00000010438	ENSRNOG00000061216
ENSRNOG00000037331	ENSRNOG00000017625	ENSRNOG00000047491
ENSRNOG00000017897	ENSRNOG00000012390	ENSRNOG00000022619
ENSRNOG00000015082	ENSRNOG00000010701	ENSRNOG00000053640
ENSRNOG00000021345	ENSRNOG00000010375	ENSRNOG00000015896
ENSRNOG00000018416	ENSRNOG00000007229	ENSRNOG00000012058
ENSRNOG00000008091	ENSRNOG00000032240	ENSRNOG00000002922
ENSRNOG00000056338	ENSRNOG00000037371	ENSRNOG00000016308
ENSRNOG00000016957	ENSRNOG00000010478	ENSRNOG00000020679
ENSRNOG00000003189	ENSRNOG00000032626	ENSRNOG00000024041
ENSRNOG00000060123	ENSRNOG00000019363	ENSRNOG00000002045
ENSRNOG00000003893	ENSRNOG00000048402	ENSRNOG00000009598
ENSRNOG00000008826	ENSRNOG00000058891	ENSRNOG00000038375
ENSRNOG00000014603	ENSRNOG00000013437	ENSRNOG00000000459
ENSRNOG00000056580	ENSRNOG00000006930	ENSRNOG00000018411
ENSRNOG00000024190	ENSRNOG00000021855	ENSRNOG00000042289
ENSRNOG00000025502	ENSRNOG00000032208	ENSRNOG00000050792
ENSRNOG00000018350	ENSRNOG00000008785	ENSRNOG00000014532
ENSRNOG00000000165	ENSRNOG00000008765	ENSRNOG00000017930
ENSRNOG00000043057	ENSRNOG00000010262	ENSRNOG00000009245
ENSRNOG00000032178	ENSRNOG00000010531	ENSRNOG00000019181
ENSRNOG00000017332	ENSRNOG00000017438	ENSRNOG00000029195
ENSRNOG00000007270	ENSRNOG00000039759	ENSRNOG00000053239
ENSRNOG00000017002	ENSRNOG00000012965	ENSRNOG00000017369
ENSRNOG00000038980	ENSRNOG00000000837	ENSRNOG00000003399
ENSRNOG00000024677	ENSRNOG00000037198	ENSRNOG00000042309
ENSRNOG00000057347	ENSRNOG00000054560	ENSRNOG00000010794
ENSRNOG00000012134	ENSRNOG00000034190	ENSRNOG00000016134
ENSRNOG00000043419	ENSRNOG00000012149	ENSRNOG00000005825
ENSRNOG00000001369	ENSRNOG00000013902	ENSRNOG00000012110
ENSRNOG00000019486	ENSRNOG00000031930	ENSRNOG00000008738
ENSRNOG00000019914	ENSRNOG00000014691	ENSRNOG00000011932
ENSRNOG00000050819	ENSRNOG00000037211	ENSRNOG00000043068
ENSRNOG00000051163	ENSRNOG00000004067	ENSRNOG00000006079
ENSRNOG00000012222	ENSRNOG00000004448	ENSRNOG00000002244
ENSRNOG00000010205	ENSRNOG00000057499	ENSRNOG00000017129
ENSRNOG00000000275	ENSRNOG00000020871	ENSRNOG00000010086
ENSRNOG00000010397	ENSRNOG00000026226	ENSRNOG00000015550
ENSRNOG00000024798	ENSRNOG00000014851	ENSRNOG00000009951
ENSRNOG00000013564	ENSRNOG00000029778	ENSRNOG00000011184
ENSRNOG00000010386	ENSRNOG00000058784	ENSRNOG00000022576
ENSRNOG00000008115	ENSRNOG00000000552	ENSRNOG00000013886
ENSRNOG00000005700	ENSRNOG00000002511	ENSRNOG00000020394
ENSRNOG00000015744	ENSRNOG00000049766	ENSRNOG00000048237
ENSRNOG00000049929	ENSRNOG00000002408	ENSRNOG00000052424
ENSRNOG00000009334	ENSRNOG00000007483	ENSRNOG00000016388
ENSRNOG00000039183	ENSRNOG00000008615	ENSRNOG00000020716
ENSRNOG00000038746	ENSRNOG00000053891	ENSRNOG00000055527
ENSRNOG00000024523	ENSRNOG00000016308	ENSRNOG00000012787
ENSRNOG00000042062	ENSRNOG00000010417	ENSRNOG00000019854
ENSRNOG00000053026	ENSRNOG00000028415	ENSRNOG00000005998
ENSRNOG00000003705	ENSRNOG00000016267	ENSRNOG00000001391
ENSRNOG00000003028	ENSRNOG00000007582	ENSRNOG00000014721
ENSRNOG00000059010	ENSRNOG00000046663	ENSRNOG00000018854
ENSRNOG00000023601	ENSRNOG00000000186	ENSRNOG00000021735
ENSRNOG00000021200	ENSRNOG00000019181	ENSRNOG00000026493
ENSRNOG00000019958	ENSRNOG00000000488	ENSRNOG00000014398
ENSRNOG00000030930	ENSRNOG00000020078	ENSRNOG00000023428
ENSRNOG00000000768	ENSRNOG00000000858	ENSRNOG00000024390
ENSRNOG00000058375	ENSRNOG00000061868	ENSRNOG00000025981
ENSRNOG00000019412	ENSRNOG00000006841	ENSRNOG00000022298
ENSRNOG00000049708	ENSRNOG00000016388	ENSRNOG00000013927
ENSRNOG00000009531	ENSRNOG00000029078	ENSRNOG00000053468
ENSRNOG00000016358	ENSRNOG00000058654	ENSRNOG00000006999
ENSRNOG00000060235	ENSRNOG00000026203	ENSRNOG00000000515
ENSRNOG00000000463	ENSRNOG00000016863	ENSRNOG00000011448
ENSRNOG00000055111	ENSRNOG00000042312	ENSRNOG00000003895
ENSRNOG00000056503	ENSRNOG00000007390	ENSRNOG00000048949
ENSRNOG00000015411	ENSRNOG00000036834	ENSRNOG00000056697
ENSRNOG00000039530	ENSRNOG00000006086	ENSRNOG00000010017
ENSRNOG00000009539	ENSRNOG00000028273	ENSRNOG00000002946
ENSRNOG00000008203	ENSRNOG00000014378	ENSRNOG00000027355
ENSRNOG00000018929	ENSRNOG00000014152	ENSRNOG00000018770
ENSRNOG00000004084	ENSRNOG00000052167	ENSRNOG00000011815
ENSRNOG00000015614	ENSRNOG00000003802	ENSRNOG00000007291
ENSRNOG00000020084	ENSRNOG00000013532	ENSRNOG00000048961
ENSRNOG00000004676	ENSRNOG00000054049	ENSRNOG00000014171
ENSRNOG00000004678	ENSRNOG00000057458	ENSRNOG00000019142
ENSRNOG00000012083	ENSRNOG00000011184	ENSRNOG00000058476
ENSRNOG00000010213	ENSRNOG00000011841	ENSRNOG00000026116
ENSRNOG00000033575	ENSRNOG00000013583	ENSRNOG00000050675
ENSRNOG00000016978	ENSRNOG00000010617	ENSRNOG00000033402
ENSRNOG00000060100	ENSRNOG00000003726	ENSRNOG00000014294
ENSRNOG00000013018	ENSRNOG00000016368	ENSRNOG00000019430
ENSRNOG00000053560	ENSRNOG00000033251	ENSRNOG00000007436
ENSRNOG00000048169	ENSRNOG00000000368	ENSRNOG00000033693
ENSRNOG00000013993	ENSRNOG00000004554	ENSRNOG00000004063
ENSRNOG00000014264	ENSRNOG00000053753	ENSRNOG00000003949
ENSRNOG00000007925	ENSRNOG00000027606	ENSRNOG00000058288
ENSRNOG00000003208	ENSRNOG00000029342	ENSRNOG00000055049
ENSRNOG00000005621	ENSRNOG00000011969	ENSRNOG00000013321
ENSRNOG00000042105	ENSRNOG00000004147	ENSRNOG00000045999
ENSRNOG00000049282	ENSRNOG00000014357	ENSRNOG00000016067
ENSRNOG00000029055	ENSRNOG00000023601	ENSRNOG00000014490
ENSRNOG00000009629	ENSRNOG00000006509	ENSRNOG00000012369
ENSRNOG00000057250	ENSRNOG00000000588	ENSRNOG00000006932
ENSRNOG00000013294	ENSRNOG00000018262	ENSRNOG00000042451
ENSRNOG00000008602	ENSRNOG00000058195	ENSRNOG00000037221
ENSRNOG00000060574	ENSRNOG00000012369	ENSRNOG00000023803
ENSRNOG00000001869	ENSRNOG00000002653	ENSRNOG00000029191
ENSRNOG00000014357	ENSRNOG00000016957	ENSRNOG00000013215
ENSRNOG00000018644	ENSRNOG00000008373	ENSRNOG00000016623
ENSRNOG00000037839	ENSRNOG00000061508	ENSRNOG00000057141
ENSRNOG00000056624	ENSRNOG00000019082	ENSRNOG00000061373
ENSRNOG00000005345	ENSRNOG00000004458	ENSRNOG00000002511
ENSRNOG00000015383	ENSRNOG00000028636	ENSRNOG00000006723
ENSRNOG00000054329	ENSRNOG00000032959	ENSRNOG00000005102
ENSRNOG00000015518	ENSRNOG00000024294	ENSRNOG00000024346
ENSRNOG00000022337	ENSRNOG00000003806	ENSRNOG00000047287
ENSRNOG00000056332	ENSRNOG00000050478	ENSRNOG00000008806
ENSRNOG00000061185	ENSRNOG00000009761	ENSRNOG00000013748
ENSRNOG00000010045	ENSRNOG00000031934	ENSRNOG00000037331
ENSRNOG00000019265	ENSRNOG00000016163	ENSRNOG00000014851
ENSRNOG00000042960	ENSRNOG00000026941	ENSRNOG00000056257
ENSRNOG00000016348	ENSRNOG00000016326	ENSRNOG00000009096
ENSRNOG00000027430	ENSRNOG00000017676	ENSRNOG00000020719
ENSRNOG00000034168	ENSRNOG00000052188	ENSRNOG00000022806
ENSRNOG00000006033	ENSRNOG00000026704	ENSRNOG00000004026
ENSRNOG00000031849	ENSRNOG00000053163	ENSRNOG00000020519
ENSRNOG00000017259	ENSRNOG00000052979	ENSRNOG00000002593
ENSRNOG00000046946	ENSRNOG00000019495	ENSRNOG00000028505
ENSRNOG00000020833	ENSRNOG00000033719	ENSRNOG00000033059
ENSRNOG00000002711	ENSRNOG00000054515	ENSRNOG00000032410
ENSRNOG00000053831	ENSRNOG00000015383	ENSRNOG00000000805
ENSRNOG00000000515	ENSRNOG00000008412	ENSRNOG00000020737
ENSRNOG00000011253	ENSRNOG00000045764	ENSRNOG00000007131
ENSRNOG00000024041	ENSRNOG00000003059	ENSRNOG00000011107
ENSRNOG00000008025	ENSRNOG00000050040	ENSRNOG00000015253
ENSRNOG00000053317	ENSRNOG00000010942	ENSRNOG00000000658
ENSRNOG00000033588	ENSRNOG00000011145	ENSRNOG00000061376
ENSRNOG00000007012	ENSRNOG00000019744	ENSRNOG00000024733
ENSRNOG00000006350	ENSRNOG00000010794	ENSRNOG00000027742
ENSRNOG00000010507	ENSRNOG00000042978	ENSRNOG00000005374
ENSRNOG00000034177	ENSRNOG00000000378	ENSRNOG00000059350
ENSRNOG00000030515	ENSRNOG00000014556	ENSRNOG00000028814
ENSRNOG00000021334	ENSRNOG00000005506	ENSRNOG00000012807
ENSRNOG00000016377	ENSRNOG00000013962	ENSRNOG00000027332
ENSRNOG00000008165	ENSRNOG00000019504	ENSRNOG00000030245
ENSRNOG00000001931	ENSRNOG00000001830	ENSRNOG00000005082
ENSRNOG00000012109	ENSRNOG00000042137	ENSRNOG00000007827
ENSRNOG00000008082	ENSRNOG00000002139	ENSRNOG00000059827
ENSRNOG00000005115	ENSRNOG00000000137	ENSRNOG00000003283
ENSRNOG00000006471	ENSRNOG00000010805	ENSRNOG00000042480
ENSRNOG00000029191	ENSRNOG00000010282	ENSRNOG00000042536
ENSRNOG00000019110	ENSRNOG00000021103	ENSRNOG00000006472
ENSRNOG00000000897	ENSRNOG00000059660	ENSRNOG00000058461
ENSRNOG00000004456	ENSRNOG00000051636	ENSRNOG00000016752
ENSRNOG00000055972	ENSRNOG00000004882	ENSRNOG00000046028
ENSRNOG00000054093	ENSRNOG00000015615	ENSRNOG00000028649
ENSRNOG00000011654	ENSRNOG00000020431	ENSRNOG00000016021
ENSRNOG00000017765	ENSRNOG00000052634	ENSRNOG00000012185
ENSRNOG00000033863	ENSRNOG00000005780	ENSRNOG00000030467
ENSRNOG00000022261	ENSRNOG00000043419	ENSRNOG00000004444
ENSRNOG00000022910	ENSRNOG00000061160	ENSRNOG00000006952
ENSRNOG00000020733	ENSRNOG00000017002	ENSRNOG00000058007
ENSRNOG00000007081	ENSRNOG00000017237	ENSRNOG00000019494
ENSRNOG00000016810	ENSRNOG00000058375	ENSRNOG00000000704
ENSRNOG00000022391	ENSRNOG00000016595	ENSRNOG00000054479
ENSRNOG00000033335	ENSRNOG00000052757	ENSRNOG00000052064
ENSRNOG00000024824	ENSRNOG00000003494	ENSRNOG00000014870
ENSRNOG00000025120	ENSRNOG00000015232	ENSRNOG00000027264
ENSRNOG00000006486	ENSRNOG00000018217	ENSRNOG00000010213
ENSRNOG00000024322	ENSRNOG00000023548	ENSRNOG00000005348
ENSRNOG00000049054	ENSRNOG00000021200	ENSRNOG00000030404
ENSRNOG00000032989	ENSRNOG00000026344	ENSRNOG00000004904
ENSRNOG00000000632	ENSRNOG00000039593	ENSRNOG00000045728
ENSRNOG00000016561	ENSRNOG00000005246	ENSRNOG00000010497
ENSRNOG00000054843	ENSRNOG00000010592	ENSRNOG00000052725
ENSRNOG00000004296	ENSRNOG00000034177	ENSRNOG00000036980
ENSRNOG00000015275	ENSRNOG00000009588	ENSRNOG00000020235
ENSRNOG00000053687	ENSRNOG00000018247	ENSRNOG00000040279
ENSRNOG00000002820	ENSRNOG00000017250	ENSRNOG00000054954
ENSRNOG00000018615	ENSRNOG00000019854	ENSRNOG00000003291
ENSRNOG00000052407	ENSRNOG00000013380	ENSRNOG00000016494
ENSRNOG00000043176	ENSRNOG00000027742	ENSRNOG00000010853
ENSRNOG00000019695	ENSRNOG00000019019	ENSRNOG00000031930
ENSRNOG00000000201	ENSRNOG00000016890	ENSRNOG00000039576
ENSRNOG00000001187	ENSRNOG00000028668	ENSRNOG00000002506
ENSRNOG00000039057	ENSRNOG00000042524	ENSRNOG00000006469
ENSRNOG00000002730	ENSRNOG00000048924	ENSRNOG00000019577
ENSRNOG00000051636	ENSRNOG00000011533	ENSRNOG00000020446
ENSRNOG00000016204	ENSRNOG00000003544	ENSRNOG00000001757
ENSRNOG00000017105	ENSRNOG00000055650	ENSRNOG00000028215
ENSRNOG00000056209	ENSRNOG00000009662	ENSRNOG00000015093
ENSRNOG00000018366	ENSRNOG00000009468	ENSRNOG00000039204
ENSRNOG00000022521	ENSRNOG00000042480	ENSRNOG00000017672
ENSRNOG00000010721	ENSRNOG00000011946	ENSRNOG00000013018
ENSRNOG00000002303	ENSRNOG00000002470	ENSRNOG00000014190
ENSRNOG00000021847	ENSRNOG00000001656	ENSRNOG00000051461
ENSRNOG00000030149	ENSRNOG00000028523	ENSRNOG00000002408
ENSRNOG00000047578	ENSRNOG00000015774	ENSRNOG00000030880
ENSRNOG00000006731	ENSRNOG00000009370	ENSRNOG00000058609
ENSRNOG00000020281	ENSRNOG00000007999	ENSRNOG00000010886
ENSRNOG00000060087	ENSRNOG00000046858	ENSRNOG00000006420
ENSRNOG00000003997	ENSRNOG00000004158	ENSRNOG00000009949
ENSRNOG00000015423	ENSRNOG00000046007	ENSRNOG00000010992
ENSRNOG00000012481	ENSRNOG00000009907	ENSRNOG00000006557
ENSRNOG00000042524	ENSRNOG00000026679	ENSRNOG00000021902
ENSRNOG00000031431	ENSRNOG00000006956	ENSRNOG00000009431
ENSRNOG00000020244	ENSRNOG00000026310	ENSRNOG00000000588
ENSRNOG00000020891	ENSRNOG00000038297	ENSRNOG00000023286
ENSRNOG00000018851	ENSRNOG00000017072	ENSRNOG00000022199
ENSRNOG00000000781	ENSRNOG00000015691	ENSRNOG00000014338
ENSRNOG00000017693	ENSRNOG00000021916	ENSRNOG00000002403
ENSRNOG00000009350	ENSRNOG00000039379	ENSRNOG00000010018
ENSRNOG00000017246	ENSRNOG00000018028	ENSRNOG00000012817
ENSRNOG00000004411	ENSRNOG00000020084	ENSRNOG00000018076
ENSRNOG00000005575	ENSRNOG00000006170	ENSRNOG00000002381
ENSRNOG00000011502	ENSRNOG00000016412	ENSRNOG00000005700
ENSRNOG00000049277	ENSRNOG00000061359	ENSRNOG00000017403
ENSRNOG00000017487	ENSRNOG00000050794	ENSRNOG00000059207
ENSRNOG00000058993	ENSRNOG00000050485	ENSRNOG00000016889
ENSRNOG00000046864	ENSRNOG00000046434	ENSRNOG00000007690
ENSRNOG00000018297	ENSRNOG00000006320	ENSRNOG00000042261
ENSRNOG00000010886	ENSRNOG00000021669	ENSRNOG00000013306
ENSRNOG00000018113	ENSRNOG00000027839	ENSRNOG00000011863
ENSRNOG00000021553	ENSRNOG00000020733	ENSRNOG00000059961
ENSRNOG00000020593	ENSRNOG00000006030	ENSRNOG00000007722
ENSRNOG00000020573	ENSRNOG00000020630	ENSRNOG00000042747
ENSRNOG00000023304	ENSRNOG00000056589	ENSRNOG00000015812
ENSRNOG00000000036	ENSRNOG00000048898	ENSRNOG00000017680
ENSRNOG00000040122	ENSRNOG00000007012	ENSRNOG00000005234
ENSRNOG00000019100	ENSRNOG00000000805	ENSRNOG00000005575
ENSRNOG00000010695	ENSRNOG00000057696	ENSRNOG00000003959
ENSRNOG00000059097	ENSRNOG00000047864	ENSRNOG00000009369
ENSRNOG00000028767	ENSRNOG00000020310	ENSRNOG00000007993
ENSRNOG00000021916	ENSRNOG00000019440	ENSRNOG00000009131
ENSRNOG00000000855	ENSRNOG00000010997	ENSRNOG00000013679
ENSRNOG00000024650	ENSRNOG00000060105	ENSRNOG00000039336
ENSRNOG00000055001	ENSRNOG00000015105	ENSRNOG00000046829
ENSRNOG00000026518	ENSRNOG00000018748	ENSRNOG00000021058
ENSRNOG00000008133	ENSRNOG00000025332	ENSRNOG00000019549
ENSRNOG00000020908	ENSRNOG00000030515	ENSRNOG00000016257
ENSRNOG00000002540	ENSRNOG00000054340	ENSRNOG00000050318
ENSRNOG00000012090	ENSRNOG00000026116	ENSRNOG00000018276
ENSRNOG00000003098	ENSRNOG00000020873	ENSRNOG00000021017
ENSRNOG00000009503	ENSRNOG00000002381	ENSRNOG00000016707
ENSRNOG00000004180	ENSRNOG00000007461	ENSRNOG00000028247
ENSRNOG00000026791	ENSRNOG00000025051	ENSRNOG00000005214
ENSRNOG00000028085	ENSRNOG00000002524	ENSRNOG00000014520
ENSRNOG00000046607	ENSRNOG00000015736	ENSRNOG00000046133
ENSRNOG00000021241	ENSRNOG00000016717	ENSRNOG00000047741
ENSRNOG00000002501	ENSRNOG00000004197	ENSRNOG00000052499
ENSRNOG00000011984	ENSRNOG00000014513	ENSRNOG00000022523
ENSRNOG00000017156	ENSRNOG00000000920	ENSRNOG00000001908
ENSRNOG00000030101	ENSRNOG00000025238	ENSRNOG00000008736
ENSRNOG00000053260	ENSRNOG00000000456	ENSRNOG00000009348
ENSRNOG00000005369	ENSRNOG00000000860	ENSRNOG00000017002
ENSRNOG00000058539	ENSRNOG00000045733	ENSRNOG00000001216
ENSRNOG00000057025	ENSRNOG00000013128	ENSRNOG00000055583
ENSRNOG00000004488	ENSRNOG00000016302	ENSRNOG00000020284
ENSRNOG00000048148	ENSRNOG00000017487	ENSRNOG00000002428
ENSRNOG00000047776	ENSRNOG00000027024	ENSRNOG00000050996
ENSRNOG00000000251	ENSRNOG00000000640	ENSRNOG00000019296
ENSRNOG00000011649	ENSRNOG00000012215	ENSRNOG00000031136
ENSRNOG00000000634	ENSRNOG00000000036	ENSRNOG00000020726
ENSRNOG00000002548	ENSRNOG00000020244	ENSRNOG00000001187
ENSRNOG00000017783	ENSRNOG00000002487	ENSRNOG00000000488
ENSRNOG00000054474	ENSRNOG00000031004	ENSRNOG00000011000
ENSRNOG00000003741	ENSRNOG00000042960	ENSRNOG00000046834
ENSRNOG00000047459	ENSRNOG00000016643	ENSRNOG00000013445
ENSRNOG00000023093	ENSRNOG00000011907	ENSRNOG00000026306
ENSRNOG00000005776	ENSRNOG00000024322	ENSRNOG00000027234
ENSRNOG00000019615	ENSRNOG00000036813	ENSRNOG00000010534
ENSRNOG00000019659	ENSRNOG00000013707	ENSRNOG00000012946
ENSRNOG00000012174	ENSRNOG00000020118	ENSRNOG00000001869
ENSRNOG00000002930	ENSRNOG00000024640	ENSRNOG00000051619
ENSRNOG00000014503	ENSRNOG00000061358	ENSRNOG00000009290
ENSRNOG00000048231	ENSRNOG00000002460	ENSRNOG00000022999
ENSRNOG00000008834	ENSRNOG00000012521	ENSRNOG00000025126
ENSRNOG00000047040	ENSRNOG00000012302	ENSRNOG00000049270
ENSRNOG00000047327	ENSRNOG00000038319	ENSRNOG00000015078
ENSRNOG00000010870	ENSRNOG00000057867	ENSRNOG00000055512
ENSRNOG00000014080	ENSRNOG00000030012	ENSRNOG00000012060
ENSRNOG00000057092	ENSRNOG00000016143	ENSRNOG00000026644
ENSRNOG00000038572	ENSRNOG00000046216	ENSRNOG00000000855
ENSRNOG00000009058	ENSRNOG00000040201	ENSRNOG00000001766
ENSRNOG00000024428	ENSRNOG00000056746	ENSRNOG00000019572
ENSRNOG00000045960	ENSRNOG00000021745	ENSRNOG00000005074
ENSRNOG00000017525	ENSRNOG00000016037	ENSRNOG00000009445
ENSRNOG00000057221	ENSRNOG00000002843	ENSRNOG00000017724
ENSRNOG00000004117	ENSRNOG00000003603	ENSRNOG00000016150
ENSRNOG00000026143	ENSRNOG00000049192	ENSRNOG00000008015
ENSRNOG00000012027	ENSRNOG00000030726	ENSRNOG00000059625
ENSRNOG00000056257	ENSRNOG00000004311	ENSRNOG00000020440
ENSRNOG00000060703	ENSRNOG00000025349	ENSRNOG00000028856
ENSRNOG00000003726	ENSRNOG00000017783	ENSRNOG00000031058
ENSRNOG00000022242	ENSRNOG00000045999	ENSRNOG00000016247
ENSRNOG00000019390	ENSRNOG00000020573	ENSRNOG00000013791
ENSRNOG00000021410	ENSRNOG00000037167	ENSRNOG00000059765
ENSRNOG00000003785	ENSRNOG00000016632	ENSRNOG00000015225
ENSRNOG00000000566	ENSRNOG00000025670	ENSRNOG00000010760
ENSRNOG00000015148	ENSRNOG00000020136	ENSRNOG00000021776
ENSRNOG00000014130	ENSRNOG00000042747	ENSRNOG00000059500
ENSRNOG00000052346	ENSRNOG00000053402	ENSRNOG00000058446
ENSRNOG00000006957	ENSRNOG00000061530	ENSRNOG00000002134
ENSRNOG00000024178	ENSRNOG00000055156	ENSRNOG00000015503
ENSRNOG00000010423	ENSRNOG00000020685	ENSRNOG00000023841
ENSRNOG00000037167	ENSRNOG00000007256	ENSRNOG00000003259
ENSRNOG00000014010	ENSRNOG00000004117	ENSRNOG00000014722
ENSRNOG00000025302	ENSRNOG00000039207	ENSRNOG00000058470
ENSRNOG00000008257	ENSRNOG00000021856	ENSRNOG00000014835
ENSRNOG00000005038	ENSRNOG00000034290	ENSRNOG00000020991
ENSRNOG00000056550	ENSRNOG00000000138	ENSRNOG00000003596
ENSRNOG00000007372	ENSRNOG00000009514	ENSRNOG00000000165
ENSRNOG00000015131	ENSRNOG00000031136	ENSRNOG00000003296
ENSRNOG00000016740	ENSRNOG00000051253	ENSRNOG00000007951
ENSRNOG00000019565	ENSRNOG00000012324	ENSRNOG00000022343
ENSRNOG00000043031	ENSRNOG00000012972	ENSRNOG00000042460
ENSRNOG00000013177	ENSRNOG00000033863	ENSRNOG00000008855
ENSRNOG00000020873	ENSRNOG00000016070	ENSRNOG00000034241
ENSRNOG00000027035	ENSRNOG00000058645	ENSRNOG00000015480
ENSRNOG00000004197	ENSRNOG00000015562	ENSRNOG00000007142
ENSRNOG00000004575	ENSRNOG00000002322	ENSRNOG00000058891
ENSRNOG00000043180	ENSRNOG00000001580	ENSRNOG00000014055
ENSRNOG00000009787	ENSRNOG00000010635	ENSRNOG00000005504
ENSRNOG00000020009	ENSRNOG00000045960	ENSRNOG00000009275
ENSRNOG00000031398	ENSRNOG00000015480	ENSRNOG00000013238
ENSRNOG00000052810	ENSRNOG00000000275	ENSRNOG00000006940
ENSRNOG00000010519	ENSRNOG00000042070	ENSRNOG00000045560
ENSRNOG00000006579	ENSRNOG00000011406	ENSRNOG00000009790
ENSRNOG00000033338	ENSRNOG00000012176	ENSRNOG00000012505
ENSRNOG00000026861	ENSRNOG00000011593	ENSRNOG00000016208
ENSRNOG00000012122	ENSRNOG00000007590	ENSRNOG00000016763
ENSRNOG00000016275	ENSRNOG00000000907	ENSRNOG00000012874
ENSRNOG00000020169	ENSRNOG00000006365	ENSRNOG00000018729
ENSRNOG00000025130	ENSRNOG00000004752	ENSRNOG00000003563
ENSRNOG00000052772	ENSRNOG00000023303	ENSRNOG00000054901
ENSRNOG00000059314	ENSRNOG00000010905	ENSRNOG00000002984
ENSRNOG00000059900	ENSRNOG00000056826	ENSRNOG00000001449
ENSRNOG00000001628	ENSRNOG00000032328	ENSRNOG00000007839
ENSRNOG00000031834	ENSRNOG00000018494	ENSRNOG00000016273
ENSRNOG00000028075	ENSRNOG00000047363	ENSRNOG00000020188
ENSRNOG00000006306	ENSRNOG00000004676	ENSRNOG00000026653
ENSRNOG00000010597	ENSRNOG00000004155	ENSRNOG00000050134
ENSRNOG00000056739	ENSRNOG00000013364	ENSRNOG00000050968
ENSRNOG00000024426	ENSRNOG00000007129	ENSRNOG00000000777
ENSRNOG00000036827	ENSRNOG00000056624	ENSRNOG00000020310
ENSRNOG00000013774	ENSRNOG00000020849	ENSRNOG00000021027
ENSRNOG00000019780	ENSRNOG00000014282	ENSRNOG00000016496
ENSRNOG00000038091	ENSRNOG00000037134	ENSRNOG00000029571
ENSRNOG00000014104	ENSRNOG00000057578	ENSRNOG00000052167
ENSRNOG00000013282	ENSRNOG00000023861	ENSRNOG00000011750
ENSRNOG00000015480	ENSRNOG00000013147	ENSRNOG00000015075
ENSRNOG00000016326	ENSRNOG00000000459	ENSRNOG00000006076
ENSRNOG00000011777	ENSRNOG00000004839	ENSRNOG00000013974
ENSRNOG00000060356	ENSRNOG00000020058	ENSRNOG00000029500
ENSRNOG00000004101	ENSRNOG00000036677	ENSRNOG00000057867
ENSRNOG00000054495	ENSRNOG00000012134	ENSRNOG00000039969
ENSRNOG00000018841	ENSRNOG00000008890	ENSRNOG00000050478
ENSRNOG00000054539	ENSRNOG00000005392	ENSRNOG00000026647
ENSRNOG00000019208	ENSRNOG00000004078	ENSRNOG00000007679
ENSRNOG00000018266	ENSRNOG00000030149	ENSRNOG00000004841
ENSRNOG00000025115	ENSRNOG00000016716	ENSRNOG00000053163
ENSRNOG00000051325	ENSRNOG00000043416	ENSRNOG00000006689
ENSRNOG00000052100	ENSRNOG00000002659	ENSRNOG00000017980
ENSRNOG00000058434	ENSRNOG00000013237	ENSRNOG00000024689
ENSRNOG00000038035	ENSRNOG00000009197	ENSRNOG00000000569
ENSRNOG00000008847	ENSRNOG00000053811	ENSRNOG00000058003
ENSRNOG00000021097	ENSRNOG00000034139	ENSRNOG00000018564
ENSRNOG00000000451	ENSRNOG00000061544	ENSRNOG00000013309
ENSRNOG00000009339	ENSRNOG00000023633	ENSRNOG00000027942
ENSRNOG00000045924	ENSRNOG00000010513	ENSRNOG00000007764
ENSRNOG00000011970	ENSRNOG00000028077	ENSRNOG00000008683
ENSRNOG00000046309	ENSRNOG00000021752	ENSRNOG00000051235
ENSRNOG00000038406	ENSRNOG00000037632	ENSRNOG00000007984
ENSRNOG00000013820	ENSRNOG00000003683	ENSRNOG00000057189
ENSRNOG00000000853	ENSRNOG00000022337	ENSRNOG00000022597
ENSRNOG00000057728	ENSRNOG00000006963	ENSRNOG00000010977
ENSRNOG00000024420	ENSRNOG00000000956	ENSRNOG00000060262
ENSRNOG00000018494	ENSRNOG00000007607	ENSRNOG00000050509
ENSRNOG00000000129	ENSRNOG00000039107	ENSRNOG00000018054
ENSRNOG00000046195	ENSRNOG00000012216	ENSRNOG00000022598
ENSRNOG00000017766	ENSRNOG00000019842	ENSRNOG00000027630
ENSRNOG00000015829	ENSRNOG00000026902	ENSRNOG00000010111
ENSRNOG00000048824	ENSRNOG00000054438	ENSRNOG00000027006
ENSRNOG00000007759	ENSRNOG00000051065	ENSRNOG00000049942
ENSRNOG00000010553	ENSRNOG00000005723	ENSRNOG00000058916
ENSRNOG00000053005	ENSRNOG00000004889	ENSRNOG00000050482
ENSRNOG00000050672	ENSRNOG00000037435	ENSRNOG00000056457
ENSRNOG00000061869	ENSRNOG00000016085	ENSRNOG00000017854
ENSRNOG00000049918	ENSRNOG00000017693	ENSRNOG00000013166
ENSRNOG00000022893	ENSRNOG00000020836	ENSRNOG00000059956
ENSRNOG00000015027	ENSRNOG00000004873	ENSRNOG00000007489
ENSRNOG00000058784	ENSRNOG00000048907	ENSRNOG00000034177
ENSRNOG00000004410	ENSRNOG00000022953	ENSRNOG00000017959
ENSRNOG00000046001	ENSRNOG00000039656	ENSRNOG00000020694
ENSRNOG00000021795	ENSRNOG00000045560	ENSRNOG00000028390
ENSRNOG00000001544	ENSRNOG00000008847	ENSRNOG00000028043
ENSRNOG00000010278	ENSRNOG00000001858	ENSRNOG00000016849
ENSRNOG00000048004	ENSRNOG00000042133	ENSRNOG00000008270
ENSRNOG00000042929	ENSRNOG00000009565	ENSRNOG00000001711
ENSRNOG00000059984	ENSRNOG00000004870	ENSRNOG00000007118
ENSRNOG00000004717	ENSRNOG00000051941	ENSRNOG00000019365
ENSRNOG00000004498	ENSRNOG00000003284	ENSRNOG00000017149
ENSRNOG00000037672	ENSRNOG00000032596	ENSRNOG00000015382
ENSRNOG00000008915	ENSRNOG00000056446	ENSRNOG00000059097
ENSRNOG00000003675	ENSRNOG00000000963	ENSRNOG00000053384
ENSRNOG00000011406	ENSRNOG00000055512	ENSRNOG00000057040
ENSRNOG00000013727	ENSRNOG00000013623	ENSRNOG00000049994
ENSRNOG00000019704	ENSRNOG00000024923	ENSRNOG00000060523
ENSRNOG00000006198	ENSRNOG00000010518	ENSRNOG00000017063
ENSRNOG00000021713	ENSRNOG00000057221	ENSRNOG00000024264
ENSRNOG00000033215	ENSRNOG00000023549	ENSRNOG00000042333
ENSRNOG00000048878	ENSRNOG00000058111	ENSRNOG00000012196
ENSRNOG00000025594	ENSRNOG00000008575	ENSRNOG00000029212
ENSRNOG00000046050	ENSRNOG00000012031	ENSRNOG00000052037
ENSRNOG00000015921	ENSRNOG00000049355	ENSRNOG00000055721
ENSRNOG00000055716	ENSRNOG00000010919	ENSRNOG00000009848
ENSRNOG00000000956	ENSRNOG00000015117	ENSRNOG00000020793
ENSRNOG00000007600	ENSRNOG00000012222	ENSRNOG00000051948
ENSRNOG00000037718	ENSRNOG00000042478	ENSRNOG00000004150
ENSRNOG00000057458	ENSRNOG00000051221	ENSRNOG00000061147
ENSRNOG00000010253	ENSRNOG00000020173	ENSRNOG00000016255
ENSRNOG00000022321	ENSRNOG00000006846	ENSRNOG00000014786
ENSRNOG00000023566	ENSRNOG00000004150	ENSRNOG00000018602
ENSRNOG00000007049	ENSRNOG00000048004	ENSRNOG00000053387
ENSRNOG00000024905	ENSRNOG00000001519	ENSRNOG00000042970
ENSRNOG00000059906	ENSRNOG00000004720	ENSRNOG00000016875
ENSRNOG00000026702	ENSRNOG00000007539	ENSRNOG00000018400
ENSRNOG00000020552	ENSRNOG00000010450	ENSRNOG00000059510
ENSRNOG00000007539	ENSRNOG00000056503	ENSRNOG00000007864
ENSRNOG00000015794	ENSRNOG00000019718	ENSRNOG00000004679
ENSRNOG00000027808	ENSRNOG00000052486	ENSRNOG00000001389
ENSRNOG00000024899	ENSRNOG00000019695	ENSRNOG00000052407
ENSRNOG00000013771	ENSRNOG00000008759	ENSRNOG00000012151
ENSRNOG00000010359	ENSRNOG00000014231	ENSRNOG00000010852
ENSRNOG00000012049	ENSRNOG00000034089	ENSRNOG00000030374
ENSRNOG00000011160	ENSRNOG00000008025	ENSRNOG00000020129
ENSRNOG00000030110	ENSRNOG00000005700	ENSRNOG00000019363
ENSRNOG00000006321	ENSRNOG00000018839	ENSRNOG00000019737
ENSRNOG00000048706	ENSRNOG00000002372	ENSRNOG00000016684
ENSRNOG00000004921	ENSRNOG00000016872	ENSRNOG00000017311
ENSRNOG00000056358	ENSRNOG00000000634	ENSRNOG00000019612
ENSRNOG00000025463	ENSRNOG00000016420	ENSRNOG00000033256
ENSRNOG00000010535	ENSRNOG00000039966	ENSRNOG00000009370
ENSRNOG00000042944	ENSRNOG00000014156	ENSRNOG00000023548
ENSRNOG00000049642	ENSRNOG00000005776	ENSRNOG00000020782
ENSRNOG00000058223	ENSRNOG00000015667	ENSRNOG00000045553
ENSRNOG00000011330	ENSRNOG00000027277	ENSRNOG00000013267
ENSRNOG00000018355	ENSRNOG00000013279	ENSRNOG00000003748
ENSRNOG00000047876	ENSRNOG00000000471	ENSRNOG00000016294
ENSRNOG00000011688	ENSRNOG00000019565	ENSRNOG00000021855
ENSRNOG00000013042	ENSRNOG00000008086	ENSRNOG00000001456
ENSRNOG00000050478	ENSRNOG00000007033	ENSRNOG00000011071
ENSRNOG00000015308	ENSRNOG00000043445	ENSRNOG00000030712
ENSRNOG00000055450	ENSRNOG00000014227	ENSRNOG00000021255
ENSRNOG00000017975	ENSRNOG00000014505	ENSRNOG00000002470
ENSRNOG00000016525	ENSRNOG00000009590	ENSRNOG00000001265
ENSRNOG00000038432	ENSRNOG00000047102	ENSRNOG00000042838
ENSRNOG00000059894	ENSRNOG00000045753	ENSRNOG00000004889
ENSRNOG00000012906	ENSRNOG00000009629	ENSRNOG00000051216
ENSRNOG00000015690	ENSRNOG00000048881	ENSRNOG00000019184
ENSRNOG00000003388	ENSRNOG00000046683	ENSRNOG00000013798
ENSRNOG00000057291	ENSRNOG00000013967	ENSRNOG00000002072
ENSRNOG00000056069	ENSRNOG00000007002	ENSRNOG00000045811
ENSRNOG00000052732	ENSRNOG00000037839	ENSRNOG00000007041
ENSRNOG00000004216	ENSRNOG00000032832	ENSRNOG00000010326
ENSRNOG00000039379	ENSRNOG00000057347	ENSRNOG00000008733
ENSRNOG00000037134	ENSRNOG00000042939	ENSRNOG00000016575
ENSRNOG00000055097	ENSRNOG00000018938	ENSRNOG00000000257
ENSRNOG00000051290	ENSRNOG00000002540	ENSRNOG00000056297
ENSRNOG00000013535	ENSRNOG00000019128	ENSRNOG00000001194
ENSRNOG00000059926	ENSRNOG00000059949	ENSRNOG00000050251
ENSRNOG00000027115	ENSRNOG00000003841	ENSRNOG00000015736
ENSRNOG00000057443	ENSRNOG00000033844	ENSRNOG00000051163
ENSRNOG00000005781	ENSRNOG00000017147	ENSRNOG00000005818
ENSRNOG00000009588	ENSRNOG00000008057	ENSRNOG00000004197
ENSRNOG00000031290	ENSRNOG00000017409	ENSRNOG00000033744
ENSRNOG00000059890	ENSRNOG00000006767	ENSRNOG00000016581
ENSRNOG00000032195	ENSRNOG00000009539	ENSRNOG00000021903
ENSRNOG00000058421	ENSRNOG00000017773	ENSRNOG00000047035
ENSRNOG00000001519	ENSRNOG00000049929	ENSRNOG00000056011
ENSRNOG00000026585	ENSRNOG00000023683	ENSRNOG00000028670
ENSRNOG00000049271	ENSRNOG00000026594	ENSRNOG00000000613
ENSRNOG00000013262	ENSRNOG00000021130	ENSRNOG00000026295
ENSRNOG00000060348	ENSRNOG00000004754	ENSRNOG00000029078
ENSRNOG00000057852	ENSRNOG00000028598	ENSRNOG00000024349
ENSRNOG00000001422	ENSRNOG00000016041	ENSRNOG00000057352
ENSRNOG00000028415	ENSRNOG00000013937	ENSRNOG00000045840
ENSRNOG00000059720	ENSRNOG00000013586	ENSRNOG00000006204
ENSRNOG00000055527	ENSRNOG00000053560	ENSRNOG00000024661
ENSRNOG00000010610	ENSRNOG00000023566	ENSRNOG00000025115
ENSRNOG00000045816	ENSRNOG00000033202	ENSRNOG00000008022
ENSRNOG00000001324	ENSRNOG00000059698	ENSRNOG00000009590
ENSRNOG00000049392	ENSRNOG00000038328	ENSRNOG00000004700
ENSRNOG00000004649	ENSRNOG00000007178	ENSRNOG00000021669
ENSRNOG00000054340	ENSRNOG00000054296	ENSRNOG00000005151
ENSRNOG00000011729	ENSRNOG00000037982	ENSRNOG00000000082
ENSRNOG00000009955	ENSRNOG00000024905	ENSRNOG00000018247
ENSRNOG00000016703	ENSRNOG00000056184	ENSRNOG00000017945
ENSRNOG00000036910	ENSRNOG00000007335	ENSRNOG00000019138
ENSRNOG00000009803	ENSRNOG00000022893	ENSRNOG00000025371
ENSRNOG00000014816	ENSRNOG00000018163	ENSRNOG00000010262
ENSRNOG00000016505	ENSRNOG00000010883	ENSRNOG00000001425
ENSRNOG00000024636	ENSRNOG00000011078	ENSRNOG00000011096
ENSRNOG00000018853	ENSRNOG00000023809	ENSRNOG00000010797
ENSRNOG00000023633	ENSRNOG00000018693	ENSRNOG00000007030
ENSRNOG00000010263	ENSRNOG00000018952	ENSRNOG00000004262
ENSRNOG00000020970	ENSRNOG00000017918	ENSRNOG00000032002
ENSRNOG00000023340	ENSRNOG00000004725	ENSRNOG00000023162
ENSRNOG00000018570	ENSRNOG00000028733	ENSRNOG00000002372
ENSRNOG00000009738	ENSRNOG00000033736	ENSRNOG00000006103
ENSRNOG00000015529	ENSRNOG00000049614	ENSRNOG00000058908
ENSRNOG00000045644	ENSRNOG00000021402	ENSRNOG00000054964
ENSRNOG00000017459	ENSRNOG00000024190	ENSRNOG00000012109
ENSRNOG00000000443	ENSRNOG00000029386	ENSRNOG00000034075
ENSRNOG00000022839	ENSRNOG00000005369	ENSRNOG00000021468
ENSRNOG00000047363	ENSRNOG00000009425	ENSRNOG00000018859
ENSRNOG00000052594	ENSRNOG00000015082	ENSRNOG00000000547
ENSRNOG00000045646	ENSRNOG00000007270	ENSRNOG00000008415
ENSRNOG00000058568	ENSRNOG00000008133	ENSRNOG00000023943
ENSRNOG00000027894	ENSRNOG00000011568	ENSRNOG00000008930
ENSRNOG00000004479	ENSRNOG00000049425	ENSRNOG00000059059
ENSRNOG00000011357	ENSRNOG00000031851	ENSRNOG00000007726
ENSRNOG00000012208	ENSRNOG00000060438	ENSRNOG00000000940
ENSRNOG00000018693	ENSRNOG00000016980	ENSRNOG00000001519
ENSRNOG00000013269	ENSRNOG00000061199	ENSRNOG00000016366
ENSRNOG00000059469	ENSRNOG00000020694	ENSRNOG00000008400
ENSRNOG00000060475	ENSRNOG00000017525	ENSRNOG00000049560
ENSRNOG00000033653	ENSRNOG00000008134	ENSRNOG00000015717
ENSRNOG00000050432	ENSRNOG00000048919	ENSRNOG00000022720
ENSRNOG00000059476	ENSRNOG00000008915	ENSRNOG00000019609
ENSRNOG00000000963	ENSRNOG00000002167	ENSRNOG00000006551
ENSRNOG00000013057	ENSRNOG00000021256	ENSRNOG00000042741
ENSRNOG00000005054	ENSRNOG00000000439	ENSRNOG00000056955
ENSRNOG00000003595	ENSRNOG00000013358	ENSRNOG00000033940
ENSRNOG00000048703	ENSRNOG00000031398	ENSRNOG00000020953
ENSRNOG00000021555	ENSRNOG00000028357	ENSRNOG00000019744
ENSRNOG00000058795	ENSRNOG00000020077	ENSRNOG00000015519
ENSRNOG00000042229	ENSRNOG00000028024	ENSRNOG00000019041
ENSRNOG00000029047	ENSRNOG00000049277	ENSRNOG00000028196
ENSRNOG00000053529	ENSRNOG00000006471	ENSRNOG00000006783
ENSRNOG00000014164	ENSRNOG00000037148	ENSRNOG00000008754
ENSRNOG00000006098	ENSRNOG00000045646	ENSRNOG00000047697
ENSRNOG00000026866	ENSRNOG00000010205	ENSRNOG00000016632
ENSRNOG00000002336	ENSRNOG00000013745	ENSRNOG00000004772
ENSRNOG00000036681	ENSRNOG00000005009	ENSRNOG00000002418
ENSRNOG00000038291	ENSRNOG00000018674	ENSRNOG00000022637
ENSRNOG00000016558	ENSRNOG00000029811	ENSRNOG00000042771
ENSRNOG00000008890	ENSRNOG00000053687	ENSRNOG00000023400
ENSRNOG00000012827	ENSRNOG00000010610	ENSRNOG00000001259
ENSRNOG00000018815	ENSRNOG00000021553	ENSRNOG00000012460
ENSRNOG00000002599	ENSRNOG00000029861	ENSRNOG00000059770
ENSRNOG00000007335	ENSRNOG00000008560	ENSRNOG00000042411
ENSRNOG00000060103	ENSRNOG00000012622	ENSRNOG00000028895
ENSRNOG00000028895	ENSRNOG00000013674	ENSRNOG00000020455
ENSRNOG00000048765	ENSRNOG00000017882	ENSRNOG00000009001
ENSRNOG00000014282	ENSRNOG00000030180	ENSRNOG00000013231
ENSRNOG00000045797	ENSRNOG00000059956	ENSRNOG00000013239
ENSRNOG00000026309	ENSRNOG00000007759	ENSRNOG00000008839
ENSRNOG00000053769	ENSRNOG00000008065	ENSRNOG00000004500
ENSRNOG00000038744	ENSRNOG00000052514	ENSRNOG00000015491
ENSRNOG00000042465	ENSRNOG00000061630	ENSRNOG00000009690
ENSRNOG00000001167	ENSRNOG00000022701	ENSRNOG00000054033
ENSRNOG00000002429	ENSRNOG00000003452	ENSRNOG00000010921
ENSRNOG00000018899	ENSRNOG00000023528	ENSRNOG00000017511
ENSRNOG00000036659	ENSRNOG00000058434	ENSRNOG00000006116
ENSRNOG00000025522	ENSRNOG00000039464	ENSRNOG00000051193
ENSRNOG00000017702	ENSRNOG00000004678	ENSRNOG00000021521
ENSRNOG00000017828	ENSRNOG00000020860	ENSRNOG00000051958
ENSRNOG00000032941	ENSRNOG00000055773	ENSRNOG00000022155
ENSRNOG00000015105	ENSRNOG00000050425	ENSRNOG00000000811
ENSRNOG00000012835	ENSRNOG00000013554	ENSRNOG00000015071
ENSRNOG00000009031	ENSRNOG00000023122	ENSRNOG00000013717
ENSRNOG00000017223	ENSRNOG00000001439	ENSRNOG00000012325
ENSRNOG00000019607	ENSRNOG00000027099	ENSRNOG00000007514
ENSRNOG00000056947	ENSRNOG00000051285	ENSRNOG00000049215
ENSRNOG00000005655	ENSRNOG00000042182	ENSRNOG00000018938
ENSRNOG00000042332	ENSRNOG00000009705	ENSRNOG00000005747
ENSRNOG00000000368	ENSRNOG00000046981	ENSRNOG00000010922
ENSRNOG00000005850	ENSRNOG00000034075	ENSRNOG00000003442
ENSRNOG00000023485	ENSRNOG00000007636	ENSRNOG00000006641
ENSRNOG00000007178	ENSRNOG00000019577	ENSRNOG00000020374
ENSRNOG00000053449	ENSRNOG00000047776	ENSRNOG00000015274
ENSRNOG00000024115	ENSRNOG00000004731	ENSRNOG00000002610
ENSRNOG00000028041	ENSRNOG00000013954	ENSRNOG00000060438
ENSRNOG00000055672	ENSRNOG00000018485	ENSRNOG00000060410
ENSRNOG00000003476	ENSRNOG00000020797	ENSRNOG00000056446
ENSRNOG00000021381	ENSRNOG00000060837	ENSRNOG00000004839
ENSRNOG00000008134	ENSRNOG00000036681	ENSRNOG00000051002
ENSRNOG00000033844	ENSRNOG00000013654	ENSRNOG00000026951
ENSRNOG00000026265	ENSRNOG00000057855	ENSRNOG00000013318
ENSRNOG00000037982	ENSRNOG00000037076	ENSRNOG00000017459
ENSRNOG00000015773	ENSRNOG00000001378	ENSRNOG00000021241
ENSRNOG00000016782	ENSRNOG00000019958	ENSRNOG00000000034
ENSRNOG00000004537	ENSRNOG00000011253	ENSRNOG00000049075
ENSRNOG00000015306	ENSRNOG00000014034	ENSRNOG00000007178
ENSRNOG00000019985	ENSRNOG00000015297	ENSRNOG00000008005
ENSRNOG00000052640	ENSRNOG00000004411	ENSRNOG00000016525
ENSRNOG00000037076	ENSRNOG00000020952	ENSRNOG00000050090
ENSRNOG00000024425	ENSRNOG00000016653	ENSRNOG00000029465
ENSRNOG00000009565	ENSRNOG00000033588	ENSRNOG00000053753
ENSRNOG00000025670	ENSRNOG00000029756	ENSRNOG00000009360
ENSRNOG00000016403	ENSRNOG00000008203	ENSRNOG00000039754
ENSRNOG00000016653	ENSRNOG00000019390	ENSRNOG00000058094
ENSRNOG00000033202	ENSRNOG00000026944	ENSRNOG00000015383
ENSRNOG00000004302	ENSRNOG00000001367	ENSRNOG00000055391
ENSRNOG00000026176	ENSRNOG00000017429	ENSRNOG00000033017
ENSRNOG00000030228	ENSRNOG00000018266	ENSRNOG00000013916
ENSRNOG00000046144	ENSRNOG00000043031	ENSRNOG00000007567
ENSRNOG00000020151	ENSRNOG00000046144	ENSRNOG00000004003
ENSRNOG00000052979	ENSRNOG00000008588	ENSRNOG00000016112
ENSRNOG00000009298	ENSRNOG00000013820	ENSRNOG00000001288
ENSRNOG00000021402	ENSRNOG00000002142	ENSRNOG00000008513
ENSRNOG00000046258	ENSRNOG00000027767	ENSRNOG00000018350
ENSRNOG00000024457	ENSRNOG00000021771	ENSRNOG00000028743
ENSRNOG00000045771	ENSRNOG00000007606	ENSRNOG00000046050
ENSRNOG00000027770	ENSRNOG00000056332	ENSRNOG00000027099
ENSRNOG00000018748	ENSRNOG00000049740	ENSRNOG00000011293
ENSRNOG00000050173	ENSRNOG00000005215	ENSRNOG00000017887
ENSRNOG00000020706	ENSRNOG00000029423	ENSRNOG00000021579
ENSRNOG00000007014	ENSRNOG00000014124	ENSRNOG00000020505
ENSRNOG00000055553	ENSRNOG00000054301	ENSRNOG00000017072
ENSRNOG00000002723	ENSRNOG00000001528	ENSRNOG00000045960
ENSRNOG00000022566	ENSRNOG00000024346	ENSRNOG00000027259
ENSRNOG00000061004	ENSRNOG00000022256	ENSRNOG00000004870
ENSRNOG00000002079	ENSRNOG00000010480	ENSRNOG00000025145
ENSRNOG00000002728	ENSRNOG00000009870	ENSRNOG00000000528
ENSRNOG00000011841	ENSRNOG00000033653	ENSRNOG00000003979
ENSRNOG00000057862	ENSRNOG00000006759	ENSRNOG00000052707
ENSRNOG00000052688	ENSRNOG00000024899	ENSRNOG00000003144
ENSRNOG00000006314	ENSRNOG00000019477	ENSRNOG00000005905
ENSRNOG00000039568	ENSRNOG00000002863	ENSRNOG00000055020
ENSRNOG00000038383	ENSRNOG00000023318	ENSRNOG00000017165
ENSRNOG00000049063	ENSRNOG00000004296	ENSRNOG00000042971
ENSRNOG00000046139	ENSRNOG00000006486	ENSRNOG00000046599
ENSRNOG00000058193	ENSRNOG00000038539	ENSRNOG00000029698
ENSRNOG00000051464	ENSRNOG00000015674	ENSRNOG00000026914
ENSRNOG00000012995	ENSRNOG00000011973	ENSRNOG00000003745
	ENSRNOG00000011305	ENSRNOG00000023786
	ENSRNOG00000048874	ENSRNOG00000014673
	ENSRNOG00000025502	ENSRNOG00000029876
	ENSRNOG00000022845	ENSRNOG00000039571
	ENSRNOG00000002592	ENSRNOG00000000463
	ENSRNOG00000016782	ENSRNOG00000061845
	ENSRNOG00000047466	ENSRNOG00000055010
	ENSRNOG00000026866	ENSRNOG00000004226
	ENSRNOG00000045913	ENSRNOG00000005388
	ENSRNOG00000042211	ENSRNOG00000008552
	ENSRNOG00000011171	ENSRNOG00000007597
	ENSRNOG00000016358	ENSRNOG00000017319
	ENSRNOG00000049392	ENSRNOG00000019440
	ENSRNOG00000002303	ENSRNOG00000061394
	ENSRNOG00000010970	ENSRNOG00000022337
	ENSRNOG00000003992	ENSRNOG00000004414
	ENSRNOG00000037082	ENSRNOG00000059041
	ENSRNOG00000055689	ENSRNOG00000058186
	ENSRNOG00000039110	ENSRNOG00000013413
	ENSRNOG00000048169	ENSRNOG00000013962
	ENSRNOG00000016221	ENSRNOG00000001827
	ENSRNOG00000001926	ENSRNOG00000018477
	ENSRNOG00000036910	ENSRNOG00000005227
	ENSRNOG00000053400	ENSRNOG00000022419
	ENSRNOG00000020706	ENSRNOG00000043201
	ENSRNOG00000054603	ENSRNOG00000055433
	ENSRNOG00000060130	ENSRNOG00000000249
	ENSRNOG00000002792	ENSRNOG00000012980
	ENSRNOG00000013330	ENSRNOG00000001007
	ENSRNOG00000016926	ENSRNOG00000028641
	ENSRNOG00000000412	ENSRNOG00000007657
	ENSRNOG00000059045	ENSRNOG00000015403
	ENSRNOG00000037137	ENSRNOG00000025167
	ENSRNOG00000046607	ENSRNOG00000019328
	ENSRNOG00000003189	ENSRNOG00000047746
	ENSRNOG00000013324	ENSRNOG00000003806
	ENSRNOG00000003279	ENSRNOG00000003866
	ENSRNOG00000046949	ENSRNOG00000007036
	ENSRNOG00000029738	ENSRNOG00000006167
	ENSRNOG00000009556	ENSRNOG00000013747
	ENSRNOG00000023209	ENSRNOG00000058654
	ENSRNOG00000029668	ENSRNOG00000001823
	ENSRNOG00000018853	ENSRNOG00000046683
	ENSRNOG00000031598	ENSRNOG00000050933
	ENSRNOG00000021724	ENSRNOG00000007076
	ENSRNOG00000006611	ENSRNOG00000025143
	ENSRNOG00000056575	ENSRNOG00000005277
	ENSRNOG00000060391	ENSRNOG00000014538
	ENSRNOG00000059784	ENSRNOG00000027550
	ENSRNOG00000058042	ENSRNOG00000005565
	ENSRNOG00000056767	ENSRNOG00000009471
	ENSRNOG00000007970	ENSRNOG00000018524
	ENSRNOG00000012061	ENSRNOG00000003171
	ENSRNOG00000010853	ENSRNOG00000026607
	ENSRNOG00000049590	ENSRNOG00000012343
	ENSRNOG00000010259	ENSRNOG00000001302
	ENSRNOG00000005345	ENSRNOG00000020698
	ENSRNOG00000007545	ENSRNOG00000019308
	ENSRNOG00000011824	ENSRNOG00000018282
	ENSRNOG00000028767	ENSRNOG00000043182
	ENSRNOG00000033490	ENSRNOG00000039593
	ENSRNOG00000002336	ENSRNOG00000047605
	ENSRNOG00000031974	ENSRNOG00000057384
	ENSRNOG00000054093	ENSRNOG00000007882
	ENSRNOG00000048039	ENSRNOG00000008868
	ENSRNOG00000003336	ENSRNOG00000008666
	ENSRNOG00000014761	ENSRNOG00000002014
	ENSRNOG00000002092	ENSRNOG00000038835
	ENSRNOG00000020901	ENSRNOG00000018690
	ENSRNOG00000025069	ENSRNOG00000023664
	ENSRNOG00000020247	ENSRNOG00000033564
	ENSRNOG00000022640	ENSRNOG00000003553
	ENSRNOG00000012682	ENSRNOG00000027357
	ENSRNOG00000029841	ENSRNOG00000005271
	ENSRNOG00000059757	ENSRNOG00000059840
	ENSRNOG00000013535	ENSRNOG00000024625
	ENSRNOG00000020245	ENSRNOG00000038868
	ENSRNOG00000057082	ENSRNOG00000047393
	ENSRNOG00000053303	ENSRNOG00000037509
	ENSRNOG00000020835	ENSRNOG00000046333
	ENSRNOG00000057443	ENSRNOG00000012141
	ENSRNOG00000042929	ENSRNOG00000019716
	ENSRNOG00000018735	ENSRNOG00000005018
	ENSRNOG00000016245	ENSRNOG00000004100
	ENSRNOG00000059840	ENSRNOG00000010027
	ENSRNOG00000060574	ENSRNOG00000002950
	ENSRNOG00000002728	ENSRNOG00000034130
	ENSRNOG00000019659	ENSRNOG00000048397
	ENSRNOG00000006957	ENSRNOG00000027286
	ENSRNOG00000018915	ENSRNOG00000047854
	ENSRNOG00000048161	ENSRNOG00000006068
	ENSRNOG00000002800	ENSRNOG00000043113
	ENSRNOG00000027942	ENSRNOG00000057945
	ENSRNOG00000001931	ENSRNOG00000010438
	ENSRNOG00000037446	ENSRNOG00000021220
	ENSRNOG00000053449	ENSRNOG00000007393
	ENSRNOG00000014503	ENSRNOG00000000728
	ENSRNOG00000006583	ENSRNOG00000011936
	ENSRNOG00000001962	ENSRNOG00000001245
	ENSRNOG00000060103	ENSRNOG00000015616
	ENSRNOG00000008602	ENSRNOG00000010468
	ENSRNOG00000042771	ENSRNOG00000033809
	ENSRNOG00000002046	ENSRNOG00000047714
	ENSRNOG00000002434	ENSRNOG00000020300
	ENSRNOG00000024041	ENSRNOG00000019195
	ENSRNOG00000005309	ENSRNOG00000025970
	ENSRNOG00000016222	ENSRNOG00000061379
	ENSRNOG00000012495	ENSRNOG00000021217
	ENSRNOG00000057404	ENSRNOG00000005008
	ENSRNOG00000000840	ENSRNOG00000007733
	ENSRNOG00000013318	ENSRNOG00000057347
	ENSRNOG00000021478	ENSRNOG00000003947
	ENSRNOG00000012481	ENSRNOG00000017024
	ENSRNOG00000001525	ENSRNOG00000043445
	ENSRNOG00000006831	ENSRNOG00000006767
	ENSRNOG00000057389	ENSRNOG00000057729
	ENSRNOG00000046048	ENSRNOG00000008170
	ENSRNOG00000057250	ENSRNOG00000009079
	ENSRNOG00000019422	ENSRNOG00000010763
	ENSRNOG00000016535	ENSRNOG00000015408
	ENSRNOG00000011970	ENSRNOG00000050210
	ENSRNOG00000002191	ENSRNOG00000017897
	ENSRNOG00000017048	ENSRNOG00000045998
	ENSRNOG00000008257	ENSRNOG00000004482
	ENSRNOG00000014534	ENSRNOG00000031612
	ENSRNOG00000052887	ENSRNOG00000004843
	ENSRNOG00000022391	ENSRNOG00000018748
	ENSRNOG00000007625	ENSRNOG00000033740
	ENSRNOG00000047307	ENSRNOG00000058087
	ENSRNOG00000038193	ENSRNOG00000004033
	ENSRNOG00000012122	ENSRNOG00000054548
	ENSRNOG00000052772	ENSRNOG00000010378
	ENSRNOG00000054465	ENSRNOG00000009211
	ENSRNOG00000059314	ENSRNOG00000051372
	ENSRNOG00000025805	ENSRNOG00000045771
	ENSRNOG00000010535	ENSRNOG00000046663
	ENSRNOG00000011723	ENSRNOG00000014964
	ENSRNOG00000014269	ENSRNOG00000060693
	ENSRNOG00000019963	ENSRNOG00000023463
	ENSRNOG00000008667	ENSRNOG00000031706
	ENSRNOG00000006395	ENSRNOG00000003251
	ENSRNOG00000019780	ENSRNOG00000018378
	ENSRNOG00000024880	ENSRNOG00000021474
	ENSRNOG00000027276	ENSRNOG00000057688
	ENSRNOG00000014861	ENSRNOG00000015063
	ENSRNOG00000013282	ENSRNOG00000016456
	ENSRNOG00000040109	ENSRNOG00000021814
	ENSRNOG00000059440	ENSRNOG00000033921
	ENSRNOG00000008951	ENSRNOG00000018408
	ENSRNOG00000001001	ENSRNOG00000017753
	ENSRNOG00000003675	ENSRNOG00000020467
	ENSRNOG00000016091	ENSRNOG00000050040
		ENSRNOG00000005450
		ENSRNOG00000003088
		ENSRNOG00000038746
		ENSRNOG00000010658
		ENSRNOG00000017702
		ENSRNOG00000019500
		ENSRNOG00000004554
		ENSRNOG00000012134
		ENSRNOG00000048567
		ENSRNOG00000007989
		ENSRNOG00000018517
		ENSRNOG00000001912
		ENSRNOG00000020468
		ENSRNOG00000042753
		ENSRNOG00000050946
		ENSRNOG00000007590
		ENSRNOG00000010045
		ENSRNOG00000015807
		ENSRNOG00000028586
		ENSRNOG00000014987
		ENSRNOG00000043176
		ENSRNOG00000015774
		ENSRNOG00000011032
		ENSRNOG00000058993
		ENSRNOG00000000692
		ENSRNOG00000004489
		ENSRNOG00000025075
		ENSRNOG00000010994
		ENSRNOG00000049498
		ENSRNOG00000012140
		ENSRNOG00000000017
		ENSRNOG00000008099
		ENSRNOG00000013261
		ENSRNOG00000007713
		ENSRNOG00000008765
		ENSRNOG00000009008
		ENSRNOG00000049361
		ENSRNOG00000005309
		ENSRNOG00000047367
		ENSRNOG00000009656
		ENSRNOG00000018603
		ENSRNOG00000048140
		ENSRNOG00000011696
		ENSRNOG00000014937
		ENSRNOG00000031045
		ENSRNOG00000007012
		ENSRNOG00000011406
		ENSRNOG00000020274
		ENSRNOG00000005960
		ENSRNOG00000010325
		ENSRNOG00000023334
		ENSRNOG00000009401
		ENSRNOG00000009730
		ENSRNOG00000052296
		ENSRNOG00000054204
		ENSRNOG00000053869
		ENSRNOG00000055156
		ENSRNOG00000007254
		ENSRNOG00000030174
		ENSRNOG00000010447
		ENSRNOG00000039627
		ENSRNOG00000031090
		ENSRNOG00000026518
		ENSRNOG00000013781
		ENSRNOG00000036661
		ENSRNOG00000023130
		ENSRNOG00000005888
		ENSRNOG00000018454
		ENSRNOG00000010649
		ENSRNOG00000033397
		ENSRNOG00000024545
		ENSRNOG00000003669
		ENSRNOG00000030688
		ENSRNOG00000040300
		ENSRNOG00000015416
		ENSRNOG00000004101
		ENSRNOG00000022256
		ENSRNOG00000058195
		ENSRNOG00000020203
		ENSRNOG00000027736
		ENSRNOG00000004273
		ENSRNOG00000016204
		ENSRNOG00000003134
		ENSRNOG00000021053
		ENSRNOG00000005951
		ENSRNOG00000001378
		ENSRNOG00000012262
		ENSRNOG00000047046
		ENSRNOG00000017690
		ENSRNOG00000013872
		ENSRNOG00000000151
		ENSRNOG00000008187
		ENSRNOG00000018346
		ENSRNOG00000046947
		ENSRNOG00000009047
		ENSRNOG00000013674
		ENSRNOG00000019270
		ENSRNOG00000000860
		ENSRNOG00000049880
		ENSRNOG00000021787
		ENSRNOG00000011078
		ENSRNOG00000021438
		ENSRNOG00000016543
		ENSRNOG00000017503
		ENSRNOG00000018858
		ENSRNOG00000014530
		ENSRNOG00000030689
		ENSRNOG00000026050
		ENSRNOG00000008133
[truncated: 1,309 more rows]

## Sheet: up
S2-up vs S1-up	S3-up vs S1-up	S4-up vs S1-up
ENSRNOG00000010840	ENSRNOG00000010841	ENSRNOG00000024243
ENSRNOG00000006604	ENSRNOG00000006604	ENSRNOG00000013484
ENSRNOG00000004516	ENSRNOG00000042860	ENSRNOG00000015354
ENSRNOG00000010841	ENSRNOG00000004517	ENSRNOG00000013133
ENSRNOG00000013641	ENSRNOG00000052017	ENSRNOG00000012566
ENSRNOG00000000704	ENSRNOG00000007377	ENSRNOG00000011913
ENSRNOG00000012566	ENSRNOG00000010840	ENSRNOG00000052564
ENSRNOG00000029141	ENSRNOG00000021586	ENSRNOG00000014021
ENSRNOG00000017672	ENSRNOG00000016623	ENSRNOG00000021198
ENSRNOG00000005639	ENSRNOG00000013641	ENSRNOG00000014874
ENSRNOG00000011541	ENSRNOG00000049471	ENSRNOG00000006604
ENSRNOG00000052564	ENSRNOG00000005639	ENSRNOG00000006649
ENSRNOG00000019648	ENSRNOG00000013720	ENSRNOG00000032959
ENSRNOG00000027491	ENSRNOG00000047706	ENSRNOG00000011068
ENSRNOG00000042860	ENSRNOG00000059770	ENSRNOG00000039668
ENSRNOG00000016623	ENSRNOG00000011490	ENSRNOG00000043451
ENSRNOG00000007377	ENSRNOG00000051307	ENSRNOG00000029141
ENSRNOG00000013552	ENSRNOG00000033527	ENSRNOG00000049349
ENSRNOG00000004517	ENSRNOG00000020729	ENSRNOG00000018233
ENSRNOG00000015318	ENSRNOG00000039668	ENSRNOG00000016479
ENSRNOG00000007302	ENSRNOG00000014166	ENSRNOG00000016516
ENSRNOG00000030210	ENSRNOG00000058034	ENSRNOG00000054957
ENSRNOG00000013720	ENSRNOG00000012566	ENSRNOG00000017206
ENSRNOG00000003357	ENSRNOG00000024243	ENSRNOG00000029598
ENSRNOG00000003172	ENSRNOG00000020030	ENSRNOG00000010840
ENSRNOG00000017206	ENSRNOG00000052564	ENSRNOG00000005931
ENSRNOG00000015310	ENSRNOG00000010977	ENSRNOG00000008373
ENSRNOG00000011750	ENSRNOG00000000704	ENSRNOG00000033527
ENSRNOG00000018694	ENSRNOG00000024536	ENSRNOG00000010841
ENSRNOG00000025053	ENSRNOG00000019648	ENSRNOG00000000201
ENSRNOG00000020060	ENSRNOG00000004516	ENSRNOG00000010047
ENSRNOG00000011478	ENSRNOG00000027491	ENSRNOG00000007338
ENSRNOG00000010977	ENSRNOG00000011750	ENSRNOG00000007256
ENSRNOG00000015354	ENSRNOG00000019203	ENSRNOG00000012062
ENSRNOG00000000142	ENSRNOG00000029141	ENSRNOG00000047706
ENSRNOG00000004400	ENSRNOG00000003357	ENSRNOG00000011824
ENSRNOG00000014021	ENSRNOG00000018233	ENSRNOG00000001953
ENSRNOG00000004699	ENSRNOG00000007338	ENSRNOG00000021166
ENSRNOG00000002052	ENSRNOG00000014021	ENSRNOG00000011478
ENSRNOG00000033527	ENSRNOG00000006649	ENSRNOG00000005195
ENSRNOG00000002810	ENSRNOG00000026604	ENSRNOG00000042860
ENSRNOG00000028545	ENSRNOG00000004400	ENSRNOG00000003999
ENSRNOG00000021586	ENSRNOG00000003999	ENSRNOG00000061100
ENSRNOG00000013694	ENSRNOG00000014879	ENSRNOG00000002488
ENSRNOG00000008373	ENSRNOG00000022777	ENSRNOG00000004516
ENSRNOG00000015093	ENSRNOG00000006357	ENSRNOG00000018627
ENSRNOG00000008173	ENSRNOG00000009734	ENSRNOG00000016343
ENSRNOG00000052017	ENSRNOG00000049880	ENSRNOG00000020119
ENSRNOG00000006649	ENSRNOG00000001254	ENSRNOG00000020851
ENSRNOG00000026604	ENSRNOG00000017672	ENSRNOG00000032472
ENSRNOG00000014166	ENSRNOG00000025625	ENSRNOG00000023261
ENSRNOG00000019622	ENSRNOG00000002810	ENSRNOG00000009772
ENSRNOG00000016219	ENSRNOG00000008855	ENSRNOG00000016301
ENSRNOG00000057308	ENSRNOG00000019680	ENSRNOG00000012094
ENSRNOG00000007613	ENSRNOG00000003587	ENSRNOG00000024082
ENSRNOG00000018735	ENSRNOG00000042492	ENSRNOG00000017962
ENSRNOG00000004766	ENSRNOG00000020980	ENSRNOG00000003869
ENSRNOG00000061100	ENSRNOG00000013742	ENSRNOG00000016156
ENSRNOG00000002488	ENSRNOG00000015310	ENSRNOG00000002553
ENSRNOG00000039668	ENSRNOG00000016058	ENSRNOG00000001295
ENSRNOG00000018233	ENSRNOG00000021536	ENSRNOG00000015741
ENSRNOG00000004147	ENSRNOG00000048951	ENSRNOG00000002343
ENSRNOG00000055078	ENSRNOG00000013141	ENSRNOG00000021259
ENSRNOG00000049471	ENSRNOG00000009620	ENSRNOG00000027491
ENSRNOG00000004458	ENSRNOG00000020060	ENSRNOG00000019243
ENSRNOG00000032959	ENSRNOG00000055078	ENSRNOG00000049537
ENSRNOG00000006509	ENSRNOG00000048365	ENSRNOG00000049471
ENSRNOG00000022777	ENSRNOG00000014603	ENSRNOG00000019752
ENSRNOG00000049880	ENSRNOG00000046848	ENSRNOG00000003515
ENSRNOG00000046005	ENSRNOG00000019161	ENSRNOG00000005615
ENSRNOG00000013484	ENSRNOG00000038999	ENSRNOG00000053045
ENSRNOG00000007319	ENSRNOG00000007654	ENSRNOG00000013720
ENSRNOG00000002947	ENSRNOG00000011478	ENSRNOG00000022707
ENSRNOG00000024345	ENSRNOG00000020119	ENSRNOG00000019161
ENSRNOG00000060949	ENSRNOG00000016301	ENSRNOG00000029342
ENSRNOG00000004712	ENSRNOG00000001711	ENSRNOG00000001627
ENSRNOG00000049714	ENSRNOG00000018694	ENSRNOG00000047656
ENSRNOG00000042939	ENSRNOG00000013552	ENSRNOG00000010183
ENSRNOG00000011593	ENSRNOG00000011068	ENSRNOG00000006075
ENSRNOG00000003999	ENSRNOG00000000201	ENSRNOG00000002331
ENSRNOG00000009802	ENSRNOG00000019138	ENSRNOG00000021586
ENSRNOG00000019680	ENSRNOG00000015318	ENSRNOG00000021242
ENSRNOG00000053086	ENSRNOG00000018282	ENSRNOG00000007377
ENSRNOG00000022694	ENSRNOG00000055411	ENSRNOG00000018237
ENSRNOG00000016058	ENSRNOG00000015354	ENSRNOG00000013141
ENSRNOG00000001750	ENSRNOG00000001189	ENSRNOG00000049402
ENSRNOG00000050040	ENSRNOG00000009802	ENSRNOG00000012772
ENSRNOG00000014398	ENSRNOG00000055049	ENSRNOG00000015982
ENSRNOG00000000257	ENSRNOG00000026295	ENSRNOG00000026965
ENSRNOG00000021536	ENSRNOG00000007431	ENSRNOG00000006509
ENSRNOG00000003587	ENSRNOG00000015741	ENSRNOG00000008046
ENSRNOG00000021719	ENSRNOG00000012110	ENSRNOG00000000521
ENSRNOG00000021840	ENSRNOG00000057308	ENSRNOG00000029911
ENSRNOG00000006859	ENSRNOG00000052037	ENSRNOG00000022777
ENSRNOG00000058891	ENSRNOG00000001249	ENSRNOG00000006741
ENSRNOG00000010970	ENSRNOG00000013694	ENSRNOG00000005695
ENSRNOG00000020980	ENSRNOG00000015902	ENSRNOG00000048365
ENSRNOG00000008947	ENSRNOG00000056257	ENSRNOG00000061484
ENSRNOG00000054549	ENSRNOG00000048961	ENSRNOG00000010524
ENSRNOG00000020729	ENSRNOG00000033567	ENSRNOG00000030210
ENSRNOG00000004660	ENSRNOG00000030210	ENSRNOG00000006735
ENSRNOG00000012436	ENSRNOG00000005008	ENSRNOG00000008615
ENSRNOG00000014508	ENSRNOG00000053086	ENSRNOG00000021206
ENSRNOG00000015741	ENSRNOG00000010265	ENSRNOG00000042492
ENSRNOG00000016516	ENSRNOG00000014524	ENSRNOG00000058034
ENSRNOG00000049349	ENSRNOG00000033791	ENSRNOG00000022686
ENSRNOG00000058034	ENSRNOG00000013484	ENSRNOG00000011284
ENSRNOG00000030106	ENSRNOG00000020088	ENSRNOG00000004708
ENSRNOG00000020119	ENSRNOG00000013133	ENSRNOG00000009080
ENSRNOG00000018282	ENSRNOG00000017146	ENSRNOG00000006410
ENSRNOG00000016388	ENSRNOG00000013994	ENSRNOG00000059837
ENSRNOG00000017188	ENSRNOG00000031536	ENSRNOG00000014303
ENSRNOG00000051307	ENSRNOG00000028390	ENSRNOG00000052247
ENSRNOG00000013166	ENSRNOG00000022432	ENSRNOG00000055259
ENSRNOG00000016479	ENSRNOG00000048433	ENSRNOG00000014166
ENSRNOG00000020088	ENSRNOG00000019336	ENSRNOG00000008001
ENSRNOG00000028390	ENSRNOG00000019752	ENSRNOG00000002135
ENSRNOG00000012471	ENSRNOG00000012438	ENSRNOG00000015461
ENSRNOG00000024433	ENSRNOG00000011541	ENSRNOG00000012436
ENSRNOG00000060524	ENSRNOG00000055966	ENSRNOG00000001030
ENSRNOG00000021735	ENSRNOG00000014874	ENSRNOG00000016038
ENSRNOG00000054212	ENSRNOG00000050378	ENSRNOG00000005639
ENSRNOG00000055411	ENSRNOG00000015093	ENSRNOG00000005730
ENSRNOG00000038297	ENSRNOG00000017619	ENSRNOG00000031536
ENSRNOG00000029911	ENSRNOG00000015002	ENSRNOG00000009802
ENSRNOG00000019752	ENSRNOG00000015982	ENSRNOG00000023148
ENSRNOG00000005615	ENSRNOG00000031706	ENSRNOG00000004936
ENSRNOG00000019161	ENSRNOG00000020525	ENSRNOG00000012035
ENSRNOG00000012110	ENSRNOG00000023109	ENSRNOG00000020583
ENSRNOG00000018859	ENSRNOG00000004101	ENSRNOG00000016058
ENSRNOG00000015160	ENSRNOG00000017206	ENSRNOG00000002146
ENSRNOG00000021589	ENSRNOG00000021589	ENSRNOG00000015551
ENSRNOG00000032472	ENSRNOG00000002947	ENSRNOG00000052555
ENSRNOG00000047174	ENSRNOG00000029876	ENSRNOG00000019680
ENSRNOG00000021814	ENSRNOG00000059827	ENSRNOG00000014508
ENSRNOG00000021103	ENSRNOG00000015253	ENSRNOG00000021719
ENSRNOG00000019336	ENSRNOG00000004660	ENSRNOG00000053086
ENSRNOG00000052037	ENSRNOG00000012436	ENSRNOG00000001795
ENSRNOG00000050714	ENSRNOG00000011284	ENSRNOG00000050404
ENSRNOG00000011184	ENSRNOG00000047046	ENSRNOG00000038784
ENSRNOG00000013515	ENSRNOG00000032472	ENSRNOG00000021013
ENSRNOG00000003969	ENSRNOG00000000257	ENSRNOG00000021441
ENSRNOG00000033567	ENSRNOG00000048472	ENSRNOG00000009552
ENSRNOG00000015858	ENSRNOG00000006019	ENSRNOG00000007431
ENSRNOG00000010592	ENSRNOG00000025676	ENSRNOG00000011490
ENSRNOG00000004040	ENSRNOG00000013515	ENSRNOG00000011969
ENSRNOG00000020118	ENSRNOG00000059510	ENSRNOG00000052070
ENSRNOG00000050251	ENSRNOG00000049349	ENSRNOG00000013742
ENSRNOG00000025676	ENSRNOG00000005391	ENSRNOG00000037647
ENSRNOG00000003841	ENSRNOG00000003969	ENSRNOG00000009149
ENSRNOG00000004890	ENSRNOG00000060524	ENSRNOG00000053362
ENSRNOG00000002238	ENSRNOG00000030486	ENSRNOG00000060949
ENSRNOG00000039865	ENSRNOG00000060523	ENSRNOG00000010248
ENSRNOG00000017428	ENSRNOG00000060949	ENSRNOG00000011526
ENSRNOG00000001389	ENSRNOG00000001389	ENSRNOG00000016271
ENSRNOG00000017625	ENSRNOG00000017019	ENSRNOG00000010832
ENSRNOG00000013437	ENSRNOG00000000787	ENSRNOG00000020030
ENSRNOG00000010447	ENSRNOG00000006075	ENSRNOG00000028992
ENSRNOG00000059510	ENSRNOG00000004699	ENSRNOG00000022356
ENSRNOG00000013133	ENSRNOG00000019622	ENSRNOG00000000412
ENSRNOG00000006357	ENSRNOG00000047174	ENSRNOG00000010392
ENSRNOG00000020942	ENSRNOG00000001627	ENSRNOG00000001715
ENSRNOG00000015253	ENSRNOG00000023312	ENSRNOG00000052391
ENSRNOG00000009033	ENSRNOG00000027630	ENSRNOG00000011964
ENSRNOG00000032150	ENSRNOG00000046667	ENSRNOG00000002053
ENSRNOG00000042480	ENSRNOG00000061379	ENSRNOG00000032487
ENSRNOG00000016863	ENSRNOG00000017828	ENSRNOG00000057556
ENSRNOG00000018755	ENSRNOG00000009772	ENSRNOG00000051548
ENSRNOG00000023312	ENSRNOG00000039856	ENSRNOG00000023587
ENSRNOG00000029342	ENSRNOG00000058827	ENSRNOG00000018566
ENSRNOG00000014691	ENSRNOG00000008046	ENSRNOG00000003973
ENSRNOG00000026295	ENSRNOG00000012471	ENSRNOG00000033528
ENSRNOG00000038319	ENSRNOG00000016479	ENSRNOG00000000142
ENSRNOG00000004589	ENSRNOG00000013408	ENSRNOG00000010238
ENSRNOG00000048924	ENSRNOG00000005018	ENSRNOG00000014241
ENSRNOG00000014948	ENSRNOG00000004890	ENSRNOG00000011513
ENSRNOG00000030486	ENSRNOG00000050419	ENSRNOG00000018231
ENSRNOG00000013072	ENSRNOG00000006741	ENSRNOG00000008364
ENSRNOG00000000547	ENSRNOG00000048389	ENSRNOG00000033791
ENSRNOG00000033970	ENSRNOG00000002469	ENSRNOG00000046848
ENSRNOG00000014874	ENSRNOG00000013294	ENSRNOG00000004660
ENSRNOG00000018509	ENSRNOG00000010047	ENSRNOG00000004890
ENSRNOG00000007540	ENSRNOG00000010447	ENSRNOG00000000551
ENSRNOG00000006741	ENSRNOG00000004712	ENSRNOG00000017550
ENSRNOG00000027445	ENSRNOG00000047023	ENSRNOG00000013694
ENSRNOG00000003515	ENSRNOG00000016544	ENSRNOG00000003256
ENSRNOG00000006841	ENSRNOG00000022107	ENSRNOG00000015904
ENSRNOG00000004540	ENSRNOG00000017625	ENSRNOG00000033776
ENSRNOG00000032208	ENSRNOG00000012390	ENSRNOG00000004662
ENSRNOG00000007256	ENSRNOG00000010478	ENSRNOG00000003611
ENSRNOG00000013962	ENSRNOG00000048402	ENSRNOG00000012658
ENSRNOG00000050378	ENSRNOG00000058891	ENSRNOG00000010034
ENSRNOG00000017072	ENSRNOG00000013437	ENSRNOG00000054765
ENSRNOG00000010326	ENSRNOG00000032208	ENSRNOG00000001580
ENSRNOG00000002072	ENSRNOG00000010531	ENSRNOG00000033280
ENSRNOG00000029598	ENSRNOG00000017438	ENSRNOG00000021536
ENSRNOG00000029876	ENSRNOG00000034190	ENSRNOG00000004517
ENSRNOG00000017395	ENSRNOG00000014691	ENSRNOG00000021840
ENSRNOG00000008855	ENSRNOG00000029778	ENSRNOG00000011593
ENSRNOG00000016301	ENSRNOG00000058784	ENSRNOG00000050378
ENSRNOG00000017019	ENSRNOG00000006841	ENSRNOG00000009323
ENSRNOG00000032708	ENSRNOG00000016388	ENSRNOG00000052873
ENSRNOG00000010994	ENSRNOG00000016863	ENSRNOG00000017767
ENSRNOG00000033445	ENSRNOG00000014152	ENSRNOG00000017359
ENSRNOG00000004752	ENSRNOG00000011184	ENSRNOG00000006334
ENSRNOG00000001580	ENSRNOG00000010617	ENSRNOG00000007654
ENSRNOG00000004377	ENSRNOG00000033251	ENSRNOG00000003587
ENSRNOG00000006814	ENSRNOG00000029342	ENSRNOG00000016066
ENSRNOG00000001378	ENSRNOG00000011969	ENSRNOG00000023312
ENSRNOG00000015736	ENSRNOG00000004147	ENSRNOG00000058784
ENSRNOG00000050425	ENSRNOG00000006509	ENSRNOG00000029082
ENSRNOG00000011161	ENSRNOG00000012369	ENSRNOG00000018217
ENSRNOG00000015002	ENSRNOG00000002653	ENSRNOG00000007682
ENSRNOG00000034089	ENSRNOG00000008373	ENSRNOG00000008012
ENSRNOG00000022704	ENSRNOG00000004458	ENSRNOG00000010748
ENSRNOG00000028891	ENSRNOG00000032959	ENSRNOG00000060105
ENSRNOG00000023148	ENSRNOG00000026704	ENSRNOG00000009311
ENSRNOG00000033923	ENSRNOG00000053163	ENSRNOG00000029861
ENSRNOG00000032844	ENSRNOG00000019495	ENSRNOG00000015353
ENSRNOG00000047023	ENSRNOG00000003059	ENSRNOG00000002653
ENSRNOG00000011208	ENSRNOG00000050040	ENSRNOG00000005149
ENSRNOG00000013279	ENSRNOG00000010942	ENSRNOG00000003522
ENSRNOG00000027630	ENSRNOG00000013962	ENSRNOG00000007512
ENSRNOG00000005391	ENSRNOG00000010282	ENSRNOG00000004147
ENSRNOG00000016544	ENSRNOG00000021103	ENSRNOG00000010478
ENSRNOG00000010942	ENSRNOG00000051636	ENSRNOG00000008173
ENSRNOG00000054795	ENSRNOG00000052757	ENSRNOG00000017188
ENSRNOG00000010853	ENSRNOG00000018217	ENSRNOG00000014713
ENSRNOG00000005723	ENSRNOG00000005246	ENSRNOG00000025625
ENSRNOG00000021771	ENSRNOG00000010592	ENSRNOG00000048472
ENSRNOG00000005008	ENSRNOG00000009588	ENSRNOG00000007426
ENSRNOG00000003522	ENSRNOG00000027742	ENSRNOG00000007923
ENSRNOG00000022155	ENSRNOG00000016890	ENSRNOG00000003464
ENSRNOG00000022988	ENSRNOG00000048924	ENSRNOG00000051307
ENSRNOG00000017912	ENSRNOG00000009662	ENSRNOG00000047174
ENSRNOG00000016302	ENSRNOG00000042480	ENSRNOG00000008565
ENSRNOG00000017438	ENSRNOG00000011946	ENSRNOG00000052887
ENSRNOG00000023809	ENSRNOG00000001656	ENSRNOG00000010397
ENSRNOG00000052887	ENSRNOG00000028523	ENSRNOG00000012674
ENSRNOG00000017024	ENSRNOG00000038297	ENSRNOG00000056246
ENSRNOG00000052757	ENSRNOG00000017072	ENSRNOG00000008129
ENSRNOG00000003756	ENSRNOG00000039379	ENSRNOG00000014549
ENSRNOG00000019495	ENSRNOG00000050794	ENSRNOG00000004040
ENSRNOG00000048898	ENSRNOG00000050485	ENSRNOG00000032618
ENSRNOG00000009772	ENSRNOG00000020630	ENSRNOG00000009639
ENSRNOG00000002085	ENSRNOG00000048898	ENSRNOG00000009867
ENSRNOG00000037710	ENSRNOG00000060105	ENSRNOG00000032788
ENSRNOG00000049770	ENSRNOG00000018748	ENSRNOG00000036608
ENSRNOG00000018938	ENSRNOG00000030515	ENSRNOG00000005177
ENSRNOG00000011634	ENSRNOG00000002524	ENSRNOG00000022681
ENSRNOG00000036608	ENSRNOG00000015736	ENSRNOG00000007345
ENSRNOG00000039107	ENSRNOG00000000920	ENSRNOG00000032659
ENSRNOG00000003066	ENSRNOG00000025238	ENSRNOG00000015685
ENSRNOG00000008046	ENSRNOG00000016302	ENSRNOG00000010747
ENSRNOG00000061379	ENSRNOG00000017487	ENSRNOG00000006357
ENSRNOG00000007147	ENSRNOG00000000640	ENSRNOG00000019390
ENSRNOG00000023551	ENSRNOG00000036813	ENSRNOG00000012324
ENSRNOG00000056716	ENSRNOG00000020118	ENSRNOG00000019203
ENSRNOG00000026493	ENSRNOG00000038319	ENSRNOG00000008961
ENSRNOG00000003931	ENSRNOG00000016143	ENSRNOG00000024213
ENSRNOG00000047046	ENSRNOG00000021745	ENSRNOG00000023101
ENSRNOG00000015982	ENSRNOG00000025349	ENSRNOG00000003476
ENSRNOG00000050485	ENSRNOG00000007256	ENSRNOG00000017468
ENSRNOG00000000920	ENSRNOG00000000138	ENSRNOG00000019080
ENSRNOG00000007189	ENSRNOG00000012324	ENSRNOG00000011944
ENSRNOG00000025930	ENSRNOG00000033863	ENSRNOG00000007331
ENSRNOG00000009662	ENSRNOG00000001580	ENSRNOG00000047023
ENSRNOG00000000589	ENSRNOG00000010635	ENSRNOG00000028207
ENSRNOG00000051147	ENSRNOG00000045960	ENSRNOG00000004819
ENSRNOG00000007625	ENSRNOG00000015480	ENSRNOG00000008030
ENSRNOG00000059459	ENSRNOG00000000275	ENSRNOG00000013027
ENSRNOG00000059041	ENSRNOG00000011593	ENSRNOG00000026163
ENSRNOG00000034075	ENSRNOG00000004752	ENSRNOG00000007779
ENSRNOG00000046667	ENSRNOG00000010905	ENSRNOG00000014691
ENSRNOG00000010047	ENSRNOG00000004839	ENSRNOG00000020249
ENSRNOG00000018416	ENSRNOG00000012134	ENSRNOG00000023109
ENSRNOG00000056338	ENSRNOG00000007607	ENSRNOG00000027229
ENSRNOG00000060123	ENSRNOG00000039107	ENSRNOG00000047898
ENSRNOG00000008826	ENSRNOG00000019842	ENSRNOG00000030449
ENSRNOG00000014603	ENSRNOG00000051065	ENSRNOG00000022622
ENSRNOG00000012134	ENSRNOG00000005723	ENSRNOG00000016665
ENSRNOG00000019486	ENSRNOG00000017693	ENSRNOG00000016695
ENSRNOG00000019914	ENSRNOG00000042133	ENSRNOG00000009173
ENSRNOG00000000275	ENSRNOG00000051941	ENSRNOG00000025238
ENSRNOG00000010397	ENSRNOG00000056446	ENSRNOG00000058434
ENSRNOG00000015744	ENSRNOG00000010518	ENSRNOG00000022619
ENSRNOG00000049929	ENSRNOG00000012031	ENSRNOG00000024041
ENSRNOG00000042062	ENSRNOG00000042478	ENSRNOG00000002045
ENSRNOG00000059010	ENSRNOG00000006846	ENSRNOG00000042289
ENSRNOG00000000463	ENSRNOG00000048004	ENSRNOG00000014532
ENSRNOG00000056503	ENSRNOG00000001519	ENSRNOG00000017369
ENSRNOG00000013018	ENSRNOG00000056503	ENSRNOG00000042309
ENSRNOG00000053560	ENSRNOG00000034089	ENSRNOG00000012110
ENSRNOG00000013993	ENSRNOG00000039966	ENSRNOG00000011184
ENSRNOG00000005621	ENSRNOG00000015667	ENSRNOG00000022576
ENSRNOG00000013294	ENSRNOG00000027277	ENSRNOG00000048237
ENSRNOG00000018644	ENSRNOG00000013279	ENSRNOG00000052424
ENSRNOG00000016348	ENSRNOG00000019565	ENSRNOG00000016388
ENSRNOG00000027430	ENSRNOG00000007002	ENSRNOG00000005998
ENSRNOG00000046946	ENSRNOG00000042939	ENSRNOG00000001391
ENSRNOG00000053831	ENSRNOG00000018938	ENSRNOG00000014721
ENSRNOG00000024041	ENSRNOG00000003841	ENSRNOG00000018854
ENSRNOG00000030515	ENSRNOG00000017147	ENSRNOG00000021735
ENSRNOG00000021334	ENSRNOG00000008057	ENSRNOG00000026493
ENSRNOG00000004456	ENSRNOG00000049929	ENSRNOG00000014398
ENSRNOG00000033863	ENSRNOG00000004754	ENSRNOG00000006999
ENSRNOG00000007081	ENSRNOG00000028598	ENSRNOG00000018770
ENSRNOG00000024824	ENSRNOG00000053560	ENSRNOG00000048961
ENSRNOG00000025120	ENSRNOG00000033202	ENSRNOG00000019142
ENSRNOG00000049054	ENSRNOG00000024905	ENSRNOG00000033402
ENSRNOG00000000201	ENSRNOG00000023809	ENSRNOG00000055049
ENSRNOG00000051636	ENSRNOG00000018693	ENSRNOG00000014490
ENSRNOG00000016204	ENSRNOG00000020694	ENSRNOG00000012369
ENSRNOG00000017105	ENSRNOG00000002167	ENSRNOG00000016623
ENSRNOG00000003997	ENSRNOG00000013358	ENSRNOG00000061373
ENSRNOG00000020891	ENSRNOG00000028024	ENSRNOG00000006723
ENSRNOG00000017693	ENSRNOG00000018674	ENSRNOG00000005102
ENSRNOG00000017487	ENSRNOG00000029811	ENSRNOG00000056257
ENSRNOG00000010886	ENSRNOG00000029861	ENSRNOG00000009096
ENSRNOG00000040122	ENSRNOG00000008560	ENSRNOG00000022806
ENSRNOG00000028085	ENSRNOG00000030180	ENSRNOG00000020519
ENSRNOG00000021241	ENSRNOG00000007759	ENSRNOG00000015253
ENSRNOG00000011649	ENSRNOG00000022701	ENSRNOG00000030245
ENSRNOG00000047040	ENSRNOG00000023528	ENSRNOG00000059827
ENSRNOG00000009058	ENSRNOG00000058434	ENSRNOG00000042480
ENSRNOG00000045960	ENSRNOG00000050425	ENSRNOG00000006472
ENSRNOG00000056257	ENSRNOG00000001439	ENSRNOG00000016021
ENSRNOG00000022242	ENSRNOG00000034075	ENSRNOG00000012185
ENSRNOG00000019390	ENSRNOG00000060837	ENSRNOG00000000704
ENSRNOG00000021410	ENSRNOG00000037076	ENSRNOG00000014870
ENSRNOG00000052346	ENSRNOG00000001378	ENSRNOG00000005348
ENSRNOG00000006957	ENSRNOG00000016653	ENSRNOG00000016494
ENSRNOG00000010423	ENSRNOG00000019390	ENSRNOG00000010853
ENSRNOG00000019565	ENSRNOG00000017429	ENSRNOG00000002506
ENSRNOG00000009787	ENSRNOG00000018266	ENSRNOG00000015093
ENSRNOG00000052810	ENSRNOG00000021771	ENSRNOG00000017672
ENSRNOG00000010519	ENSRNOG00000054301	ENSRNOG00000013018
ENSRNOG00000031834	ENSRNOG00000024899	ENSRNOG00000014190
ENSRNOG00000028075	ENSRNOG00000038539	ENSRNOG00000058609
ENSRNOG00000006306	ENSRNOG00000026866	ENSRNOG00000010886
ENSRNOG00000056739	ENSRNOG00000042211	ENSRNOG00000023286
ENSRNOG00000024426	ENSRNOG00000010970	ENSRNOG00000022199
ENSRNOG00000038091	ENSRNOG00000016221	ENSRNOG00000002403
ENSRNOG00000015480	ENSRNOG00000053400	ENSRNOG00000018076
ENSRNOG00000004101	ENSRNOG00000020706	ENSRNOG00000059961
ENSRNOG00000018841	ENSRNOG00000016926	ENSRNOG00000015812
ENSRNOG00000018266	ENSRNOG00000059045	ENSRNOG00000039336
ENSRNOG00000025115	ENSRNOG00000029738	ENSRNOG00000050318
ENSRNOG00000052100	ENSRNOG00000058042	ENSRNOG00000021017
ENSRNOG00000058434	ENSRNOG00000056767	ENSRNOG00000028247
ENSRNOG00000000451	ENSRNOG00000010853	ENSRNOG00000052499
ENSRNOG00000011970	ENSRNOG00000049590	ENSRNOG00000019296
ENSRNOG00000038406	ENSRNOG00000011824	ENSRNOG00000012060
ENSRNOG00000057728	ENSRNOG00000020901	ENSRNOG00000016247
ENSRNOG00000015829	ENSRNOG00000012682	ENSRNOG00000015503
ENSRNOG00000048824	ENSRNOG00000020245	ENSRNOG00000023841
ENSRNOG00000007759	ENSRNOG00000059840	ENSRNOG00000008855
ENSRNOG00000058784	ENSRNOG00000006957	ENSRNOG00000015480
ENSRNOG00000004410	ENSRNOG00000002434	ENSRNOG00000058891
ENSRNOG00000046001	ENSRNOG00000024041	ENSRNOG00000014055
ENSRNOG00000021795	ENSRNOG00000016222	ENSRNOG00000013238
ENSRNOG00000048004	ENSRNOG00000006831	ENSRNOG00000002984
ENSRNOG00000037672	ENSRNOG00000019422	ENSRNOG00000050134
ENSRNOG00000033215	ENSRNOG00000011970	ENSRNOG00000021027
ENSRNOG00000025594	ENSRNOG00000017048	ENSRNOG00000029571
ENSRNOG00000037718	ENSRNOG00000014534	ENSRNOG00000011750
ENSRNOG00000024905	ENSRNOG00000052887	ENSRNOG00000013974
ENSRNOG00000024899	ENSRNOG00000007625	ENSRNOG00000027942
ENSRNOG00000013771	ENSRNOG00000047307	ENSRNOG00000008683
ENSRNOG00000012049	ENSRNOG00000038193	ENSRNOG00000010977
ENSRNOG00000011160	ENSRNOG00000011723	ENSRNOG00000018054
ENSRNOG00000030110	ENSRNOG00000019963	ENSRNOG00000027630
ENSRNOG00000056358	ENSRNOG00000008667	ENSRNOG00000058916
ENSRNOG00000025463	ENSRNOG00000006395	ENSRNOG00000013166
ENSRNOG00000058223	ENSRNOG00000059440	ENSRNOG00000017959
ENSRNOG00000017975	ENSRNOG00000016091	ENSRNOG00000020694
ENSRNOG00000057291		ENSRNOG00000028390
ENSRNOG00000039379		ENSRNOG00000001711
ENSRNOG00000051290		ENSRNOG00000057040
ENSRNOG00000013535		ENSRNOG00000060523
ENSRNOG00000027115		ENSRNOG00000042333
ENSRNOG00000009588		ENSRNOG00000012196
ENSRNOG00000031290		ENSRNOG00000052037
ENSRNOG00000059890		ENSRNOG00000016255
ENSRNOG00000032195		ENSRNOG00000016875
ENSRNOG00000058421		ENSRNOG00000018400
ENSRNOG00000001519		ENSRNOG00000059510
ENSRNOG00000026585		ENSRNOG00000001389
ENSRNOG00000059720		ENSRNOG00000019612
ENSRNOG00000045816		ENSRNOG00000045553
ENSRNOG00000001324		ENSRNOG00000011071
ENSRNOG00000011729		ENSRNOG00000019184
ENSRNOG00000016703		ENSRNOG00000002072
ENSRNOG00000009803		ENSRNOG00000010326
ENSRNOG00000018570		ENSRNOG00000000257
ENSRNOG00000017459		ENSRNOG00000050251
ENSRNOG00000011357		ENSRNOG00000015736
ENSRNOG00000018693		ENSRNOG00000028670
ENSRNOG00000059469		ENSRNOG00000026295
ENSRNOG00000005054		ENSRNOG00000024349
ENSRNOG00000003595		ENSRNOG00000057352
ENSRNOG00000029047		ENSRNOG00000045840
ENSRNOG00000006098		ENSRNOG00000025115
ENSRNOG00000026866		ENSRNOG00000005151
ENSRNOG00000048765		ENSRNOG00000017945
ENSRNOG00000026309		ENSRNOG00000019138
ENSRNOG00000053769		ENSRNOG00000034075
ENSRNOG00000042465		ENSRNOG00000018859
ENSRNOG00000017702		ENSRNOG00000000547
ENSRNOG00000017828		ENSRNOG00000001519
ENSRNOG00000009031		ENSRNOG00000056955
ENSRNOG00000017223		ENSRNOG00000015519
ENSRNOG00000019607		ENSRNOG00000006783
ENSRNOG00000005655		ENSRNOG00000008754
ENSRNOG00000003476		ENSRNOG00000047697
ENSRNOG00000026265		ENSRNOG00000002418
ENSRNOG00000015773		ENSRNOG00000012460
ENSRNOG00000037076		ENSRNOG00000059770
ENSRNOG00000016653		ENSRNOG00000020455
ENSRNOG00000033202		ENSRNOG00000008839
ENSRNOG00000004302		ENSRNOG00000017511
ENSRNOG00000026176		ENSRNOG00000021521
ENSRNOG00000030228		ENSRNOG00000022155
ENSRNOG00000027770		ENSRNOG00000018938
ENSRNOG00000018748		ENSRNOG00000005747
ENSRNOG00000020706		ENSRNOG00000020374
ENSRNOG00000022566		ENSRNOG00000060438
ENSRNOG00000061004		ENSRNOG00000060410
ENSRNOG00000002079		ENSRNOG00000056446
ENSRNOG00000057862		ENSRNOG00000004839
ENSRNOG00000038383		ENSRNOG00000026951
ENSRNOG00000049063		ENSRNOG00000017459
		ENSRNOG00000021241
		ENSRNOG00000029465
		ENSRNOG00000058094
		ENSRNOG00000013916
		ENSRNOG00000004003
		ENSRNOG00000027099
		ENSRNOG00000017072
		ENSRNOG00000045960
		ENSRNOG00000027259
		ENSRNOG00000025145
		ENSRNOG00000052707
		ENSRNOG00000017165
		ENSRNOG00000042971
		ENSRNOG00000026914
		ENSRNOG00000029876
		ENSRNOG00000000463
		ENSRNOG00000061845
		ENSRNOG00000055010
		ENSRNOG00000008552
		ENSRNOG00000007597
		ENSRNOG00000059041
		ENSRNOG00000013413
		ENSRNOG00000013962
		ENSRNOG00000001827
		ENSRNOG00000055433
		ENSRNOG00000000249
		ENSRNOG00000015403
		ENSRNOG00000001823
		ENSRNOG00000050933
		ENSRNOG00000005277
		ENSRNOG00000027550
		ENSRNOG00000003171
		ENSRNOG00000026607
		ENSRNOG00000020698
		ENSRNOG00000018282
		ENSRNOG00000007882
		ENSRNOG00000008868
		ENSRNOG00000018690
		ENSRNOG00000023664
		ENSRNOG00000003553
		ENSRNOG00000059840
		ENSRNOG00000005018
		ENSRNOG00000006068
		ENSRNOG00000043113
		ENSRNOG00000011936
		ENSRNOG00000021217
		ENSRNOG00000005008
		ENSRNOG00000007733
		ENSRNOG00000017024
		ENSRNOG00000015408
		ENSRNOG00000031612
		ENSRNOG00000018748
		ENSRNOG00000033740
		ENSRNOG00000060693
		ENSRNOG00000016456
		ENSRNOG00000021814
		ENSRNOG00000020467
		ENSRNOG00000050040
		ENSRNOG00000017702
		ENSRNOG00000019500
		ENSRNOG00000012134
		ENSRNOG00000048567
		ENSRNOG00000015807
		ENSRNOG00000049498
		ENSRNOG00000013261
		ENSRNOG00000009008
		ENSRNOG00000009656
		ENSRNOG00000014937
		ENSRNOG00000054204
		ENSRNOG00000007254
		ENSRNOG00000010447
		ENSRNOG00000013781
		ENSRNOG00000036661
		ENSRNOG00000023130
		ENSRNOG00000010649
		ENSRNOG00000030688
		ENSRNOG00000004101
		ENSRNOG00000016204
		ENSRNOG00000001378
		ENSRNOG00000047046
		ENSRNOG00000046947
		ENSRNOG00000049880
		ENSRNOG00000057097
		ENSRNOG00000008826
		ENSRNOG00000055530
		ENSRNOG00000029778
		ENSRNOG00000050767
		ENSRNOG00000042912
		ENSRNOG00000034190
		ENSRNOG00000007611
		ENSRNOG00000004425
		ENSRNOG00000049770
		ENSRNOG00000033202
		ENSRNOG00000050794
		ENSRNOG00000031834
		ENSRNOG00000016164
		ENSRNOG00000019186
		ENSRNOG00000019486
		ENSRNOG00000005918
		ENSRNOG00000023366
		ENSRNOG00000025676
		ENSRNOG00000023177
		ENSRNOG00000000920
		ENSRNOG00000013658
		ENSRNOG00000055936
		ENSRNOG00000018570
		ENSRNOG00000020514
		ENSRNOG00000038047
		ENSRNOG00000023576
		ENSRNOG00000012759
		ENSRNOG00000007866
		ENSRNOG00000007687
		ENSRNOG00000042478
		ENSRNOG00000021771
		ENSRNOG00000003195
		ENSRNOG00000008191
		ENSRNOG00000059834
		ENSRNOG00000052017
		ENSRNOG00000045626
		ENSRNOG00000017045
		ENSRNOG00000018148
		ENSRNOG00000014948
		ENSRNOG00000033445
		ENSRNOG00000006631
		ENSRNOG00000033957
		ENSRNOG00000024899
		ENSRNOG00000004695
		ENSRNOG00000059010
		ENSRNOG00000003841
		ENSRNOG00000050553
		ENSRNOG00000061005
		ENSRNOG00000020416
		ENSRNOG00000028975
		ENSRNOG00000005345
		ENSRNOG00000017019
		ENSRNOG00000018784
		ENSRNOG00000011208
		ENSRNOG00000016110
		ENSRNOG00000059922
		ENSRNOG00000053889
		ENSRNOG00000019519
		ENSRNOG00000048898
		ENSRNOG00000057161
		ENSRNOG00000058571
		ENSRNOG00000027290
		ENSRNOG00000057308
		ENSRNOG00000052810
		ENSRNOG00000025994
		ENSRNOG00000030319
		ENSRNOG00000003997
		ENSRNOG00000001071
		ENSRNOG00000019862
		ENSRNOG00000004712
		ENSRNOG00000046250
		ENSRNOG00000013573
		ENSRNOG00000060123
		ENSRNOG00000021103
		ENSRNOG00000019864
		ENSRNOG00000007147
		ENSRNOG00000011723
		ENSRNOG00000053347
		ENSRNOG00000006841
		ENSRNOG00000017105
		ENSRNOG00000027380
		ENSRNOG00000049771
		ENSRNOG00000006104
		ENSRNOG00000018509
		ENSRNOG00000018427
		ENSRNOG00000013294
		ENSRNOG00000008837
		ENSRNOG00000004754
		ENSRNOG00000030515
		ENSRNOG00000009646
		ENSRNOG00000022101
		ENSRNOG00000015609
		ENSRNOG00000048264
		ENSRNOG00000054561
		ENSRNOG00000027245
		ENSRNOG00000013330
		ENSRNOG00000016442
		ENSRNOG00000048818
		ENSRNOG00000004476
		ENSRNOG00000048402
		ENSRNOG00000053081
		ENSRNOG00000039379
		ENSRNOG00000012728
		ENSRNOG00000010695
		ENSRNOG00000026265
		ENSRNOG00000020118
		ENSRNOG00000029740
		ENSRNOG00000036813
		ENSRNOG00000013825
		ENSRNOG00000042445
		ENSRNOG00000004458
		ENSRNOG00000020891
		ENSRNOG00000010270
		ENSRNOG00000012438
		ENSRNOG00000011440
		ENSRNOG00000000825
		ENSRNOG00000007574
		ENSRNOG00000003931
		ENSRNOG00000042833
		ENSRNOG00000048726
		ENSRNOG00000022988
		ENSRNOG00000050650
		ENSRNOG00000008600
		ENSRNOG00000034089
		ENSRNOG00000016697
		ENSRNOG00000030547
		ENSRNOG00000020248
		ENSRNOG00000026527
		ENSRNOG00000004752
		ENSRNOG00000054709
		ENSRNOG00000023812
		ENSRNOG00000055411
		ENSRNOG00000058611
		ENSRNOG00000013932
		ENSRNOG00000018962
		ENSRNOG00000014973
		ENSRNOG00000016863
		ENSRNOG00000011726
		ENSRNOG00000030719
		ENSRNOG00000001506
		ENSRNOG00000019474
		ENSRNOG00000022286
		ENSRNOG00000014025
		ENSRNOG00000038239
		ENSRNOG00000016890
		ENSRNOG00000009734
		ENSRNOG00000051147
		ENSRNOG00000037795
		ENSRNOG00000037672
		ENSRNOG00000032844
		ENSRNOG00000029370
		ENSRNOG00000010617
		ENSRNOG00000051024
		ENSRNOG00000033970
		ENSRNOG00000058444
		ENSRNOG00000004540
		ENSRNOG00000003533
		ENSRNOG00000043342
		ENSRNOG00000027115
		ENSRNOG00000003244
		ENSRNOG00000019162
		ENSRNOG00000053831
		ENSRNOG00000016653
		ENSRNOG00000017975
		ENSRNOG00000051941
		ENSRNOG00000023809
		ENSRNOG00000028075
		ENSRNOG00000026704
		ENSRNOG00000011160
		ENSRNOG00000046946
		ENSRNOG00000009588
		ENSRNOG00000026944
		ENSRNOG00000010592
		ENSRNOG00000045837
		ENSRNOG00000021795
		ENSRNOG00000001874
		ENSRNOG00000031739
		ENSRNOG00000009708
		ENSRNOG00000049929
		ENSRNOG00000019770
		ENSRNOG00000021480
		ENSRNOG00000020625
		ENSRNOG00000010535
		ENSRNOG00000045581
		ENSRNOG00000046086
		ENSRNOG00000012701
		ENSRNOG00000017625
		ENSRNOG00000012302
		ENSRNOG00000002085
		ENSRNOG00000026883
		ENSRNOG00000008313
		ENSRNOG00000024918
		ENSRNOG00000000716
		ENSRNOG00000011634
		ENSRNOG00000013437
		ENSRNOG00000024508
		ENSRNOG00000011649
		ENSRNOG00000054917
		ENSRNOG00000023404
		ENSRNOG00000037718
		ENSRNOG00000007900
		ENSRNOG00000017619
		ENSRNOG00000027096
		ENSRNOG00000032708
		ENSRNOG00000055078
		ENSRNOG00000007625
		ENSRNOG00000058437
		ENSRNOG00000008534
		ENSRNOG00000003263
		ENSRNOG00000017223
		ENSRNOG00000025764
		ENSRNOG00000048706
		ENSRNOG00000007823
		ENSRNOG00000028991
		ENSRNOG00000012686
		ENSRNOG00000014366
		ENSRNOG00000020998
		ENSRNOG00000055547
		ENSRNOG00000020164
		ENSRNOG00000039856
		ENSRNOG00000009409
		ENSRNOG00000017804
		ENSRNOG00000059093
		ENSRNOG00000006970
		ENSRNOG00000019447
		ENSRNOG00000060882
		ENSRNOG00000016405
		ENSRNOG00000026309
		ENSRNOG00000042062
		ENSRNOG00000053560
		ENSRNOG00000038406
		ENSRNOG00000038319
		ENSRNOG00000021109
		ENSRNOG00000049067
		ENSRNOG00000026974
		ENSRNOG00000019565
		ENSRNOG00000031685
		ENSRNOG00000056767
		ENSRNOG00000016957
		ENSRNOG00000013279
		ENSRNOG00000025463
		ENSRNOG00000019249
		ENSRNOG00000020165
		ENSRNOG00000018101
		ENSRNOG00000001006
		ENSRNOG00000042939
		ENSRNOG00000004456
		ENSRNOG00000021410
		ENSRNOG00000028837
		ENSRNOG00000059734
		ENSRNOG00000037076
		ENSRNOG00000051825
		ENSRNOG00000059851
		ENSRNOG00000009031
		ENSRNOG00000007255
		ENSRNOG00000025160
		ENSRNOG00000058276
		ENSRNOG00000057291
		ENSRNOG00000015076
		ENSRNOG00000004018
		ENSRNOG00000026866
		ENSRNOG00000013869
		ENSRNOG00000010880
		ENSRNOG00000054768
		ENSRNOG00000018445
		ENSRNOG00000060524
		ENSRNOG00000029047
		ENSRNOG00000037928
		ENSRNOG00000018693
		ENSRNOG00000042465
		ENSRNOG00000059962
		ENSRNOG00000058870
		ENSRNOG00000014865
		ENSRNOG00000058202
		ENSRNOG00000022335
		ENSRNOG00000018416
		ENSRNOG00000038331
		ENSRNOG00000054131
		ENSRNOG00000002831
		ENSRNOG00000030180
		ENSRNOG00000001520
		ENSRNOG00000016302
		ENSRNOG00000006846
		ENSRNOG00000053728
		ENSRNOG00000060829
		ENSRNOG00000029147
		ENSRNOG00000023068
		ENSRNOG00000051150
		ENSRNOG00000003952
		ENSRNOG00000019120
		ENSRNOG00000031665
		ENSRNOG00000009140
		ENSRNOG00000012742
		ENSRNOG00000051399
		ENSRNOG00000038241
		ENSRNOG00000001578
		ENSRNOG00000028730
		ENSRNOG00000011334
		ENSRNOG00000009691
		ENSRNOG00000032973
		ENSRNOG00000052844
		ENSRNOG00000005438
		ENSRNOG00000014907
		ENSRNOG00000048172
		ENSRNOG00000048824
		ENSRNOG00000029738
		ENSRNOG00000055204
		ENSRNOG00000018266
		ENSRNOG00000038066
		ENSRNOG00000050647
		ENSRNOG00000005246
		ENSRNOG00000037406
		ENSRNOG00000007441
		ENSRNOG00000006010
		ENSRNOG00000009058
		ENSRNOG00000052954
		ENSRNOG00000036758
		ENSRNOG00000036877
		ENSRNOG00000014218
		ENSRNOG00000052368
		ENSRNOG00000056358
		ENSRNOG00000060782
		ENSRNOG00000059469
		ENSRNOG00000011508
		ENSRNOG00000057728
		ENSRNOG00000014672
		ENSRNOG00000018798
		ENSRNOG00000015859
		ENSRNOG00000050425
		ENSRNOG00000024905
		ENSRNOG00000056847
		ENSRNOG00000049921
		ENSRNOG00000033923
		ENSRNOG00000050983
		ENSRNOG00000014118
		ENSRNOG00000005955
		ENSRNOG00000013770
		ENSRNOG00000025882
		ENSRNOG00000039517
		ENSRNOG00000023551
		ENSRNOG00000050123
		ENSRNOG00000022331
		ENSRNOG00000005335
		ENSRNOG00000013358
		ENSRNOG00000018895
		ENSRNOG00000007189
		ENSRNOG00000015376
		ENSRNOG00000002968
		ENSRNOG00000057214
		ENSRNOG00000016091
		ENSRNOG00000010344
		ENSRNOG00000003066
		ENSRNOG00000013914
		ENSRNOG00000027770
		ENSRNOG00000011376
		ENSRNOG00000030486
		ENSRNOG00000060984
		ENSRNOG00000004029
		ENSRNOG00000032300
		ENSRNOG00000003537
		ENSRNOG00000032578
		ENSRNOG00000015957
		ENSRNOG00000049649
		ENSRNOG00000020434
		ENSRNOG00000009797
		ENSRNOG00000058683
		ENSRNOG00000022957
		ENSRNOG00000037710
		ENSRNOG00000050015
		ENSRNOG00000047503
		ENSRNOG00000015156
		ENSRNOG00000021302
		ENSRNOG00000007341
		ENSRNOG00000056603
		ENSRNOG00000026514
		ENSRNOG00000058133
		ENSRNOG00000027601
		ENSRNOG00000024975
		ENSRNOG00000025130
		ENSRNOG00000025925
		ENSRNOG00000030110
		ENSRNOG00000028064
		ENSRNOG00000014840
		ENSRNOG00000020443
		ENSRNOG00000014070
		ENSRNOG00000024712
		ENSRNOG00000046212
		ENSRNOG00000059227
		ENSRNOG00000012450
		ENSRNOG00000005726
		ENSRNOG00000056087
		ENSRNOG00000028426
		ENSRNOG00000010423
		ENSRNOG00000054989
		ENSRNOG00000049383
		ENSRNOG00000011268
		ENSRNOG00000006306
		ENSRNOG00000061238
		ENSRNOG00000016437
		ENSRNOG00000013808
		ENSRNOG00000036700
		ENSRNOG00000047890
		ENSRNOG00000000693
		ENSRNOG00000010283
		ENSRNOG00000061863
		ENSRNOG00000032085
		ENSRNOG00000057865
		ENSRNOG00000006919
		ENSRNOG00000007508
		ENSRNOG00000051905
		ENSRNOG00000005944
		ENSRNOG00000057322
		ENSRNOG00000048004
		ENSRNOG00000025594
		ENSRNOG00000013408
		ENSRNOG00000003595
		ENSRNOG00000052054
		ENSRNOG00000004399
		ENSRNOG00000002905
		ENSRNOG00000031689
		ENSRNOG00000050784
		ENSRNOG00000047368
		ENSRNOG00000059440
		ENSRNOG00000011705
		ENSRNOG00000048317
		ENSRNOG00000000451
		ENSRNOG00000017053
		ENSRNOG00000025489
		ENSRNOG00000014233
		ENSRNOG00000016613
		ENSRNOG00000019959
		ENSRNOG00000025349
		ENSRNOG00000004390
		ENSRNOG00000020980
		ENSRNOG00000048674
		ENSRNOG00000029211
		ENSRNOG00000046139
		ENSRNOG00000033863
		ENSRNOG00000052346
		ENSRNOG00000057272
		ENSRNOG00000020272
		ENSRNOG00000010970
		ENSRNOG00000053751
		ENSRNOG00000010741
		ENSRNOG00000054246
		ENSRNOG00000003435
		ENSRNOG00000013555
		ENSRNOG00000032946
		ENSRNOG00000031448
		ENSRNOG00000036631
		ENSRNOG00000047307
		ENSRNOG00000011420
		ENSRNOG00000043390
		ENSRNOG00000054483
		ENSRNOG00000053937
		ENSRNOG00000056537
		ENSRNOG00000037552
		ENSRNOG00000059466
		ENSRNOG00000060724
		ENSRNOG00000000542
		ENSRNOG00000001923
		ENSRNOG00000020614
		ENSRNOG00000052586
		ENSRNOG00000020606
		ENSRNOG00000056503
		ENSRNOG00000003370
		ENSRNOG00000026080
		ENSRNOG00000057527
		ENSRNOG00000051621
		ENSRNOG00000029318
		ENSRNOG00000027971
		ENSRNOG00000050729
		ENSRNOG00000030910
		ENSRNOG00000016348
		ENSRNOG00000001577
		ENSRNOG00000002004
		ENSRNOG00000019921
		ENSRNOG00000024426
		ENSRNOG00000054052
		ENSRNOG00000010784
		ENSRNOG00000004642
		ENSRNOG00000024283
		ENSRNOG00000056656
		ENSRNOG00000009154
		ENSRNOG00000019704
		ENSRNOG00000008979
		ENSRNOG00000004341
		ENSRNOG00000038383
		ENSRNOG00000019963
		ENSRNOG00000010699
		ENSRNOG00000051304
		ENSRNOG00000020669
		ENSRNOG00000031348
		ENSRNOG00000015668
		ENSRNOG00000015773
		ENSRNOG00000018631
		ENSRNOG00000006395
		ENSRNOG00000032745
		ENSRNOG00000006990
		ENSRNOG00000024657
		ENSRNOG00000048230
		ENSRNOG00000019177
		ENSRNOG00000060849
		ENSRNOG00000043378
		ENSRNOG00000032847
		ENSRNOG00000007542
		ENSRNOG00000057697

## Sheet: down
S2-down vs S1-down	S3-down vs S1-down	S4-down vs S1-down
ENSRNOG00000008176	ENSRNOG00000008176	ENSRNOG00000008176
ENSRNOG00000008536	ENSRNOG00000008536	ENSRNOG00000008536
ENSRNOG00000025757	ENSRNOG00000016983	ENSRNOG00000016983
ENSRNOG00000016983	ENSRNOG00000025757	ENSRNOG00000025757
ENSRNOG00000000413	ENSRNOG00000000413	ENSRNOG00000020955
ENSRNOG00000017833	ENSRNOG00000020955	ENSRNOG00000018943
ENSRNOG00000018943	ENSRNOG00000016243	ENSRNOG00000016243
ENSRNOG00000016243	ENSRNOG00000017833	ENSRNOG00000012307
ENSRNOG00000012307	ENSRNOG00000018943	ENSRNOG00000019810
ENSRNOG00000020955	ENSRNOG00000012307	ENSRNOG00000000413
ENSRNOG00000017060	ENSRNOG00000002256	ENSRNOG00000017060
ENSRNOG00000016714	ENSRNOG00000017060	ENSRNOG00000002256
ENSRNOG00000002256	ENSRNOG00000016714	ENSRNOG00000016714
ENSRNOG00000005269	ENSRNOG00000016460	ENSRNOG00000031643
ENSRNOG00000006151	ENSRNOG00000019810	ENSRNOG00000005269
ENSRNOG00000014327	ENSRNOG00000002579	ENSRNOG00000006151
ENSRNOG00000019810	ENSRNOG00000005269	ENSRNOG00000018250
ENSRNOG00000018250	ENSRNOG00000006151	ENSRNOG00000014327
ENSRNOG00000037085	ENSRNOG00000014327	ENSRNOG00000012681
ENSRNOG00000059166	ENSRNOG00000021084	ENSRNOG00000037085
ENSRNOG00000012477	ENSRNOG00000001480	ENSRNOG00000059166
ENSRNOG00000021090	ENSRNOG00000019851	ENSRNOG00000058539
ENSRNOG00000022099	ENSRNOG00000018250	ENSRNOG00000001963
ENSRNOG00000009073	ENSRNOG00000059166	ENSRNOG00000057092
ENSRNOG00000014815	ENSRNOG00000012477	ENSRNOG00000055111
ENSRNOG00000009466	ENSRNOG00000022099	ENSRNOG00000009073
ENSRNOG00000011659	ENSRNOG00000012723	ENSRNOG00000021090
ENSRNOG00000019851	ENSRNOG00000037085	ENSRNOG00000020281
ENSRNOG00000028238	ENSRNOG00000014815	ENSRNOG00000003388
ENSRNOG00000015049	ENSRNOG00000009052	ENSRNOG00000019851
ENSRNOG00000048430	ENSRNOG00000011659	ENSRNOG00000009466
ENSRNOG00000023227	ENSRNOG00000009466	ENSRNOG00000011659
ENSRNOG00000012723	ENSRNOG00000021090	ENSRNOG00000015131
ENSRNOG00000009450	ENSRNOG00000007905	ENSRNOG00000022099
ENSRNOG00000008949	ENSRNOG00000009073	ENSRNOG00000012723
ENSRNOG00000007495	ENSRNOG00000028238	ENSRNOG00000027035
ENSRNOG00000016526	ENSRNOG00000058752	ENSRNOG00000008797
ENSRNOG00000013391	ENSRNOG00000028015	ENSRNOG00000000632
ENSRNOG00000006122	ENSRNOG00000017546	ENSRNOG00000015049
ENSRNOG00000057701	ENSRNOG00000037563	ENSRNOG00000005936
ENSRNOG00000011754	ENSRNOG00000048430	ENSRNOG00000014815
ENSRNOG00000030848	ENSRNOG00000008949	ENSRNOG00000028415
ENSRNOG00000058068	ENSRNOG00000018414	ENSRNOG00000026143
ENSRNOG00000002579	ENSRNOG00000023227	ENSRNOG00000059900
ENSRNOG00000058752	ENSRNOG00000006122	ENSRNOG00000049708
ENSRNOG00000027230	ENSRNOG00000012367	ENSRNOG00000013057
ENSRNOG00000047218	ENSRNOG00000009450	ENSRNOG00000018815
ENSRNOG00000003722	ENSRNOG00000017484	ENSRNOG00000024428
ENSRNOG00000034258	ENSRNOG00000021243	ENSRNOG00000032929
ENSRNOG00000006025	ENSRNOG00000047218	ENSRNOG00000008040
ENSRNOG00000004327	ENSRNOG00000002365	ENSRNOG00000012835
ENSRNOG00000029079	ENSRNOG00000019728	ENSRNOG00000019100
ENSRNOG00000046468	ENSRNOG00000018251	ENSRNOG00000010306
ENSRNOG00000020369	ENSRNOG00000007495	ENSRNOG00000015794
ENSRNOG00000022697	ENSRNOG00000020369	ENSRNOG00000050819
ENSRNOG00000006146	ENSRNOG00000000815	ENSRNOG00000051158
ENSRNOG00000006776	ENSRNOG00000011054	ENSRNOG00000016412
ENSRNOG00000020747	ENSRNOG00000038881	ENSRNOG00000048430
ENSRNOG00000014867	ENSRNOG00000017980	ENSRNOG00000017833
ENSRNOG00000003616	ENSRNOG00000043451	ENSRNOG00000047314
ENSRNOG00000012720	ENSRNOG00000013973	ENSRNOG00000027894
ENSRNOG00000021029	ENSRNOG00000030848	ENSRNOG00000024178
ENSRNOG00000008141	ENSRNOG00000011754	ENSRNOG00000003183
ENSRNOG00000005390	ENSRNOG00000014867	ENSRNOG00000022261
ENSRNOG00000011994	ENSRNOG00000016526	ENSRNOG00000014837
ENSRNOG00000047706	ENSRNOG00000002097	ENSRNOG00000011654
ENSRNOG00000061147	ENSRNOG00000046254	ENSRNOG00000029055
ENSRNOG00000001128	ENSRNOG00000027230	ENSRNOG00000020807
ENSRNOG00000032410	ENSRNOG00000013578	ENSRNOG00000032778
ENSRNOG00000043387	ENSRNOG00000022697	ENSRNOG00000013917
ENSRNOG00000015550	ENSRNOG00000013391	ENSRNOG00000003802
ENSRNOG00000033796	ENSRNOG00000010319	ENSRNOG00000016454
ENSRNOG00000007905	ENSRNOG00000036829	ENSRNOG00000023227
ENSRNOG00000009736	ENSRNOG00000003622	ENSRNOG00000006122
ENSRNOG00000046972	ENSRNOG00000003722	ENSRNOG00000007906
ENSRNOG00000013306	ENSRNOG00000005390	ENSRNOG00000046452
ENSRNOG00000011648	ENSRNOG00000009001	ENSRNOG00000021243
ENSRNOG00000016837	ENSRNOG00000005809	ENSRNOG00000004479
ENSRNOG00000017786	ENSRNOG00000033734	ENSRNOG00000060356
ENSRNOG00000028015	ENSRNOG00000058068	ENSRNOG00000003453
ENSRNOG00000027024	ENSRNOG00000001224	ENSRNOG00000008949
ENSRNOG00000017421	ENSRNOG00000007350	ENSRNOG00000015529
ENSRNOG00000000500	ENSRNOG00000005670	ENSRNOG00000006198
ENSRNOG00000012609	ENSRNOG00000029079	ENSRNOG00000057760
ENSRNOG00000016543	ENSRNOG00000001128	ENSRNOG00000018113
ENSRNOG00000005670	ENSRNOG00000013179	ENSRNOG00000029107
ENSRNOG00000008423	ENSRNOG00000006146	ENSRNOG00000006653
ENSRNOG00000008806	ENSRNOG00000011648	ENSRNOG00000013547
ENSRNOG00000029401	ENSRNOG00000017277	ENSRNOG00000060703
ENSRNOG00000016460	ENSRNOG00000046699	ENSRNOG00000001369
ENSRNOG00000005798	ENSRNOG00000013220	ENSRNOG00000007495
ENSRNOG00000019404	ENSRNOG00000000655	ENSRNOG00000021084
ENSRNOG00000005053	ENSRNOG00000004327	ENSRNOG00000009450
ENSRNOG00000012303	ENSRNOG00000012779	ENSRNOG00000028238
ENSRNOG00000057880	ENSRNOG00000046834	ENSRNOG00000027811
ENSRNOG00000028945	ENSRNOG00000016496	ENSRNOG00000014080
ENSRNOG00000020532	ENSRNOG00000029399	ENSRNOG00000011754
ENSRNOG00000009522	ENSRNOG00000024159	ENSRNOG00000050071
ENSRNOG00000029399	ENSRNOG00000057701	ENSRNOG00000011296
ENSRNOG00000060021	ENSRNOG00000002385	ENSRNOG00000008986
ENSRNOG00000019403	ENSRNOG00000034258	ENSRNOG00000014343
ENSRNOG00000027736	ENSRNOG00000003616	ENSRNOG00000016526
ENSRNOG00000005934	ENSRNOG00000046468	ENSRNOG00000030848
ENSRNOG00000000653	ENSRNOG00000011994	ENSRNOG00000024077
ENSRNOG00000012367	ENSRNOG00000027811	ENSRNOG00000030101
ENSRNOG00000008942	ENSRNOG00000005807	ENSRNOG00000038035
ENSRNOG00000004473	ENSRNOG00000021157	ENSRNOG00000013069
ENSRNOG00000053640	ENSRNOG00000054524	ENSRNOG00000012318
ENSRNOG00000052498	ENSRNOG00000022975	ENSRNOG00000009052
ENSRNOG00000017546	ENSRNOG00000059140	ENSRNOG00000008165
ENSRNOG00000059857	ENSRNOG00000043387	ENSRNOG00000013598
ENSRNOG00000005690	ENSRNOG00000015049	ENSRNOG00000001480
ENSRNOG00000011901	ENSRNOG00000012160	ENSRNOG00000051615
ENSRNOG00000002097	ENSRNOG00000045992	ENSRNOG00000009334
ENSRNOG00000052006	ENSRNOG00000003453	ENSRNOG00000015810
ENSRNOG00000021670	ENSRNOG00000009912	ENSRNOG00000056209
ENSRNOG00000028225	ENSRNOG00000008465	ENSRNOG00000053272
ENSRNOG00000021128	ENSRNOG00000021199	ENSRNOG00000038881
ENSRNOG00000018551	ENSRNOG00000008045	ENSRNOG00000024650
ENSRNOG00000058645	ENSRNOG00000012172	ENSRNOG00000059997
ENSRNOG00000021053	ENSRNOG00000053200	ENSRNOG00000028259
ENSRNOG00000047781	ENSRNOG00000019404	ENSRNOG00000000636
ENSRNOG00000016838	ENSRNOG00000026235	ENSRNOG00000017277
ENSRNOG00000018598	ENSRNOG00000008933	ENSRNOG00000010721
ENSRNOG00000020719	ENSRNOG00000017414	ENSRNOG00000010386
ENSRNOG00000019278	ENSRNOG00000006324	ENSRNOG00000013774
ENSRNOG00000002459	ENSRNOG00000061147	ENSRNOG00000056069
ENSRNOG00000013927	ENSRNOG00000053272	ENSRNOG00000010063
ENSRNOG00000009052	ENSRNOG00000010516	ENSRNOG00000003722
ENSRNOG00000054524	ENSRNOG00000002208	ENSRNOG00000031431
ENSRNOG00000028649	ENSRNOG00000023708	ENSRNOG00000018929
ENSRNOG00000033893	ENSRNOG00000016543	ENSRNOG00000014130
ENSRNOG00000019587	ENSRNOG00000008141	ENSRNOG00000014960
ENSRNOG00000013474	ENSRNOG00000006025	ENSRNOG00000024365
ENSRNOG00000040108	ENSRNOG00000024382	ENSRNOG00000058752
ENSRNOG00000009726	ENSRNOG00000012681	ENSRNOG00000024382
ENSRNOG00000018378	ENSRNOG00000016469	ENSRNOG00000005390
ENSRNOG00000008966	ENSRNOG00000004192	ENSRNOG00000021713
ENSRNOG00000028043	ENSRNOG00000030930	ENSRNOG00000017414
ENSRNOG00000006420	ENSRNOG00000017020	ENSRNOG00000021433
ENSRNOG00000053766	ENSRNOG00000008409	ENSRNOG00000032446
ENSRNOG00000023803	ENSRNOG00000011901	ENSRNOG00000011946
ENSRNOG00000049452	ENSRNOG00000033796	ENSRNOG00000032596
ENSRNOG00000047393	ENSRNOG00000006776	ENSRNOG00000000479
ENSRNOG00000019361	ENSRNOG00000005798	ENSRNOG00000025198
ENSRNOG00000014656	ENSRNOG00000020747	ENSRNOG00000029401
ENSRNOG00000049410	ENSRNOG00000019147	ENSRNOG00000038286
ENSRNOG00000014409	ENSRNOG00000007726	ENSRNOG00000058856
ENSRNOG00000030285	ENSRNOG00000010266	ENSRNOG00000003657
ENSRNOG00000046788	ENSRNOG00000012720	ENSRNOG00000028015
ENSRNOG00000004583	ENSRNOG00000021029	ENSRNOG00000017484
ENSRNOG00000010320	ENSRNOG00000004249	ENSRNOG00000061085
ENSRNOG00000019627	ENSRNOG00000047606	ENSRNOG00000012280
ENSRNOG00000031208	ENSRNOG00000020532	ENSRNOG00000002208
ENSRNOG00000058983	ENSRNOG00000032410	ENSRNOG00000004682
ENSRNOG00000006930	ENSRNOG00000040108	ENSRNOG00000016689
ENSRNOG00000007726	ENSRNOG00000014294	ENSRNOG00000019620
ENSRNOG00000013973	ENSRNOG00000029401	ENSRNOG00000037211
ENSRNOG00000007706	ENSRNOG00000013547	ENSRNOG00000033335
ENSRNOG00000005082	ENSRNOG00000011245	ENSRNOG00000009339
ENSRNOG00000002511	ENSRNOG00000030285	ENSRNOG00000019403
ENSRNOG00000001480	ENSRNOG00000015089	ENSRNOG00000018715
ENSRNOG00000059350	ENSRNOG00000022565	ENSRNOG00000008115
ENSRNOG00000014163	ENSRNOG00000017786	ENSRNOG00000059894
ENSRNOG00000013324	ENSRNOG00000050430	ENSRNOG00000029768
ENSRNOG00000021468	ENSRNOG00000047800	ENSRNOG00000021847
ENSRNOG00000002436	ENSRNOG00000058337	ENSRNOG00000015423
ENSRNOG00000010992	ENSRNOG00000000853	ENSRNOG00000019728
ENSRNOG00000042460	ENSRNOG00000018434	ENSRNOG00000005037
ENSRNOG00000056940	ENSRNOG00000012807	ENSRNOG00000018251
ENSRNOG00000023465	ENSRNOG00000015550	ENSRNOG00000048411
ENSRNOG00000032703	ENSRNOG00000042905	ENSRNOG00000003208
ENSRNOG00000018606	ENSRNOG00000009736	ENSRNOG00000009912
ENSRNOG00000012095	ENSRNOG00000054251	ENSRNOG00000017259
ENSRNOG00000042753	ENSRNOG00000006653	ENSRNOG00000051528
ENSRNOG00000001007	ENSRNOG00000007679	ENSRNOG00000012367
ENSRNOG00000033528	ENSRNOG00000014653	ENSRNOG00000048166
ENSRNOG00000000805	ENSRNOG00000011000	ENSRNOG00000004487
ENSRNOG00000000239	ENSRNOG00000028016	ENSRNOG00000011971
ENSRNOG00000003479	ENSRNOG00000010181	ENSRNOG00000009629
ENSRNOG00000017311	ENSRNOG00000009331	ENSRNOG00000029061
ENSRNOG00000033772	ENSRNOG00000006420	ENSRNOG00000013727
ENSRNOG00000020695	ENSRNOG00000016837	ENSRNOG00000016377
ENSRNOG00000013954	ENSRNOG00000016838	ENSRNOG00000033734
ENSRNOG00000008943	ENSRNOG00000053288	ENSRNOG00000015089
ENSRNOG00000052725	ENSRNOG00000025691	ENSRNOG00000009503
ENSRNOG00000020014	ENSRNOG00000021100	ENSRNOG00000004327
ENSRNOG00000010797	ENSRNOG00000021424	ENSRNOG00000039744
ENSRNOG00000046547	ENSRNOG00000031045	ENSRNOG00000015921
ENSRNOG00000011411	ENSRNOG00000005871	ENSRNOG00000057701
ENSRNOG00000026644	ENSRNOG00000019445	ENSRNOG00000001143
ENSRNOG00000056697	ENSRNOG00000006940	ENSRNOG00000000795
ENSRNOG00000008933	ENSRNOG00000060329	ENSRNOG00000004921
ENSRNOG00000053163	ENSRNOG00000012095	ENSRNOG00000022911
ENSRNOG00000009348	ENSRNOG00000061403	ENSRNOG00000037563
ENSRNOG00000046699	ENSRNOG00000013474	ENSRNOG00000004968
ENSRNOG00000001557	ENSRNOG00000038286	ENSRNOG00000032178
ENSRNOG00000038286	ENSRNOG00000021161	ENSRNOG00000016469
ENSRNOG00000033570	ENSRNOG00000000187	ENSRNOG00000039859
ENSRNOG00000008697	ENSRNOG00000024931	ENSRNOG00000000187
ENSRNOG00000000187	ENSRNOG00000005825	ENSRNOG00000005115
ENSRNOG00000012512	ENSRNOG00000049282	ENSRNOG00000001349
ENSRNOG00000018276	ENSRNOG00000028992	ENSRNOG00000014137
ENSRNOG00000039969	ENSRNOG00000055751	ENSRNOG00000030058
ENSRNOG00000009919	ENSRNOG00000047781	ENSRNOG00000047800
ENSRNOG00000002208	ENSRNOG00000016810	ENSRNOG00000010701
ENSRNOG00000046133	ENSRNOG00000012609	ENSRNOG00000011777
ENSRNOG00000013547	ENSRNOG00000026143	ENSRNOG00000046972
ENSRNOG00000014964	ENSRNOG00000001752	ENSRNOG00000045752
ENSRNOG00000003669	ENSRNOG00000017421	ENSRNOG00000017981
ENSRNOG00000059500	ENSRNOG00000059857	ENSRNOG00000058068
ENSRNOG00000003209	ENSRNOG00000050697	ENSRNOG00000018094
ENSRNOG00000027109	ENSRNOG00000005690	ENSRNOG00000053047
ENSRNOG00000036692	ENSRNOG00000007393	ENSRNOG00000054474
ENSRNOG00000001259	ENSRNOG00000052064	ENSRNOG00000016810
ENSRNOG00000053037	ENSRNOG00000052006	ENSRNOG00000042944
ENSRNOG00000014538	ENSRNOG00000030021	ENSRNOG00000030021
ENSRNOG00000013679	ENSRNOG00000020719	ENSRNOG00000008880
ENSRNOG00000002934	ENSRNOG00000046972	ENSRNOG00000024114
ENSRNOG00000033217	ENSRNOG00000001369	ENSRNOG00000011054
ENSRNOG00000016724	ENSRNOG00000008806	ENSRNOG00000014956
ENSRNOG00000003442	ENSRNOG00000006557	ENSRNOG00000046699
ENSRNOG00000000383	ENSRNOG00000017226	ENSRNOG00000012216
ENSRNOG00000024382	ENSRNOG00000060021	ENSRNOG00000012119
ENSRNOG00000039582	ENSRNOG00000003954	ENSRNOG00000029079
ENSRNOG00000019316	ENSRNOG00000000699	ENSRNOG00000006048
ENSRNOG00000003596	ENSRNOG00000006231	ENSRNOG00000009785
ENSRNOG00000016671	ENSRNOG00000008666	ENSRNOG00000034258
ENSRNOG00000053384	ENSRNOG00000005620	ENSRNOG00000004249
ENSRNOG00000015089	ENSRNOG00000011977	ENSRNOG00000036703
ENSRNOG00000007142	ENSRNOG00000042139	ENSRNOG00000013521
ENSRNOG00000032339	ENSRNOG00000012303	ENSRNOG00000017874
ENSRNOG00000017226	ENSRNOG00000037838	ENSRNOG00000001088
ENSRNOG00000049942	ENSRNOG00000020845	ENSRNOG00000007483
ENSRNOG00000000373	ENSRNOG00000008423	ENSRNOG00000022975
ENSRNOG00000012280	ENSRNOG00000019430	ENSRNOG00000022859
ENSRNOG00000053288	ENSRNOG00000022859	ENSRNOG00000012160
ENSRNOG00000012721	ENSRNOG00000013679	ENSRNOG00000005659
ENSRNOG00000006324	ENSRNOG00000010018	ENSRNOG00000015357
ENSRNOG00000006204	ENSRNOG00000019627	ENSRNOG00000020871
ENSRNOG00000002802	ENSRNOG00000013922	ENSRNOG00000019141
ENSRNOG00000017560	ENSRNOG00000020105	ENSRNOG00000024420
ENSRNOG00000008237	ENSRNOG00000051158	ENSRNOG00000033192
ENSRNOG00000006653	ENSRNOG00000005053	ENSRNOG00000050111
ENSRNOG00000023162	ENSRNOG00000043219	ENSRNOG00000005798
ENSRNOG00000008001	ENSRNOG00000028043	ENSRNOG00000037409
ENSRNOG00000053753	ENSRNOG00000005934	ENSRNOG00000060100
ENSRNOG00000013179	ENSRNOG00000028036	ENSRNOG00000029399
ENSRNOG00000056457	ENSRNOG00000021644	ENSRNOG00000013578
ENSRNOG00000023708	ENSRNOG00000050509	ENSRNOG00000025946
ENSRNOG00000009872	ENSRNOG00000030034	ENSRNOG00000015275
ENSRNOG00000049351	ENSRNOG00000010063	ENSRNOG00000006025
ENSRNOG00000018858	ENSRNOG00000020695	ENSRNOG00000016152
ENSRNOG00000018602	ENSRNOG00000049452	ENSRNOG00000046468
ENSRNOG00000006086	ENSRNOG00000008942	ENSRNOG00000012083
ENSRNOG00000017854	ENSRNOG00000028945	ENSRNOG00000008932
ENSRNOG00000019418	ENSRNOG00000037331	ENSRNOG00000049033
ENSRNOG00000018254	ENSRNOG00000009347	ENSRNOG00000005670
ENSRNOG00000057464	ENSRNOG00000030880	ENSRNOG00000007805
ENSRNOG00000043219	ENSRNOG00000016671	ENSRNOG00000017765
ENSRNOG00000046829	ENSRNOG00000018378	ENSRNOG00000022521
ENSRNOG00000012879	ENSRNOG00000006079	ENSRNOG00000016706
ENSRNOG00000026053	ENSRNOG00000057058	ENSRNOG00000012051
ENSRNOG00000016372	ENSRNOG00000019890	ENSRNOG00000000653
ENSRNOG00000051619	ENSRNOG00000009522	ENSRNOG00000028137
ENSRNOG00000036677	ENSRNOG00000017874	ENSRNOG00000020531
ENSRNOG00000015357	ENSRNOG00000009385	ENSRNOG00000001224
ENSRNOG00000023548	ENSRNOG00000030776	ENSRNOG00000007467
ENSRNOG00000002365	ENSRNOG00000001431	ENSRNOG00000027230
ENSRNOG00000016267	ENSRNOG00000002820	ENSRNOG00000021424
ENSRNOG00000028992	ENSRNOG00000010232	ENSRNOG00000054524
ENSRNOG00000047606	ENSRNOG00000058983	ENSRNOG00000023628
ENSRNOG00000021548	ENSRNOG00000021802	ENSRNOG00000018040
ENSRNOG00000046599	ENSRNOG00000032339	ENSRNOG00000002820
ENSRNOG00000012989	ENSRNOG00000053430	ENSRNOG00000014163
ENSRNOG00000043199	ENSRNOG00000018350	ENSRNOG00000048449
ENSRNOG00000010378	ENSRNOG00000008846	ENSRNOG00000020263
ENSRNOG00000018804	ENSRNOG00000032396	ENSRNOG00000008933
ENSRNOG00000021256	ENSRNOG00000033893	ENSRNOG00000033796
ENSRNOG00000022637	ENSRNOG00000046788	ENSRNOG00000042286
ENSRNOG00000011562	ENSRNOG00000025209	ENSRNOG00000012531
ENSRNOG00000043350	ENSRNOG00000014956	ENSRNOG00000021802
ENSRNOG00000031163	ENSRNOG00000024114	ENSRNOG00000003346
ENSRNOG00000000940	ENSRNOG00000004444	ENSRNOG00000013167
ENSRNOG00000048321	ENSRNOG00000018276	ENSRNOG00000012543
ENSRNOG00000046834	ENSRNOG00000006926	ENSRNOG00000038572
ENSRNOG00000053113	ENSRNOG00000026306	ENSRNOG00000019582
ENSRNOG00000001302	ENSRNOG00000008738	ENSRNOG00000004133
ENSRNOG00000046763	ENSRNOG00000043201	ENSRNOG00000006776
ENSRNOG00000043201	ENSRNOG00000007993	ENSRNOG00000009331
ENSRNOG00000007584	ENSRNOG00000028225	ENSRNOG00000004667
ENSRNOG00000030021	ENSRNOG00000021128	ENSRNOG00000003622
ENSRNOG00000009951	ENSRNOG00000019278	ENSRNOG00000012720
ENSRNOG00000037563	ENSRNOG00000023005	ENSRNOG00000024798
ENSRNOG00000009790	ENSRNOG00000015423	ENSRNOG00000015329
ENSRNOG00000008846	ENSRNOG00000018804	ENSRNOG00000021029
ENSRNOG00000009445	ENSRNOG00000021670	ENSRNOG00000039183
ENSRNOG00000006641	ENSRNOG00000002459	ENSRNOG00000018414
ENSRNOG00000011000	ENSRNOG00000023428	ENSRNOG00000000655
ENSRNOG00000008930	ENSRNOG00000009726	ENSRNOG00000024688
ENSRNOG00000033734	ENSRNOG00000004089	ENSRNOG00000002471
ENSRNOG00000006926	ENSRNOG00000000653	ENSRNOG00000006146
ENSRNOG00000054080	ENSRNOG00000006108	ENSRNOG00000022697
ENSRNOG00000030880	ENSRNOG00000008237	ENSRNOG00000009005
ENSRNOG00000017874	ENSRNOG00000003291	ENSRNOG00000007890
ENSRNOG00000005871	ENSRNOG00000049942	ENSRNOG00000004412
ENSRNOG00000020875	ENSRNOG00000013167	ENSRNOG00000001524
ENSRNOG00000004276	ENSRNOG00000020281	ENSRNOG00000001229
ENSRNOG00000007159	ENSRNOG00000002794	ENSRNOG00000026235
ENSRNOG00000023943	ENSRNOG00000057092	ENSRNOG00000061070
ENSRNOG00000003251	ENSRNOG00000001302	ENSRNOG00000037838
ENSRNOG00000011227	ENSRNOG00000001007	ENSRNOG00000055300
ENSRNOG00000028743	ENSRNOG00000018606	ENSRNOG00000011213
ENSRNOG00000006911	ENSRNOG00000009790	ENSRNOG00000023005
ENSRNOG00000050869	ENSRNOG00000030187	ENSRNOG00000005376
ENSRNOG00000011977	ENSRNOG00000020263	ENSRNOG00000018551
ENSRNOG00000001158	ENSRNOG00000014963	ENSRNOG00000022325
ENSRNOG00000001825	ENSRNOG00000010497	ENSRNOG00000047606
ENSRNOG00000050509	ENSRNOG00000029107	ENSRNOG00000004964
ENSRNOG00000031643	ENSRNOG00000033059	ENSRNOG00000057464
ENSRNOG00000014705	ENSRNOG00000029662	ENSRNOG00000025209
ENSRNOG00000027811	ENSRNOG00000049782	ENSRNOG00000052006
ENSRNOG00000039571	ENSRNOG00000003596	ENSRNOG00000009303
ENSRNOG00000037409	ENSRNOG00000004414	ENSRNOG00000021199
ENSRNOG00000002667	ENSRNOG00000033744	ENSRNOG00000056714
ENSRNOG00000014835	ENSRNOG00000014656	ENSRNOG00000016724
ENSRNOG00000016684	ENSRNOG00000027109	ENSRNOG00000007292
ENSRNOG00000010181	ENSRNOG00000013306	ENSRNOG00000026252
ENSRNOG00000048951	ENSRNOG00000003183	ENSRNOG00000045924
ENSRNOG00000008027	ENSRNOG00000005378	ENSRNOG00000014336
ENSRNOG00000022884	ENSRNOG00000030712	ENSRNOG00000018874
ENSRNOG00000018052	ENSRNOG00000056714	ENSRNOG00000012477
ENSRNOG00000061376	ENSRNOG00000006911	ENSRNOG00000006731
ENSRNOG00000014956	ENSRNOG00000036703	ENSRNOG00000005871
ENSRNOG00000005506	ENSRNOG00000014163	ENSRNOG00000019418
ENSRNOG00000013578	ENSRNOG00000020636	ENSRNOG00000037198
ENSRNOG00000045829	ENSRNOG00000025946	ENSRNOG00000017850
ENSRNOG00000055721	ENSRNOG00000021713	ENSRNOG00000033658
ENSRNOG00000016679	ENSRNOG00000057880	ENSRNOG00000020747
ENSRNOG00000011154	ENSRNOG00000039754	ENSRNOG00000020845
ENSRNOG00000061910	ENSRNOG00000031058	ENSRNOG00000007350
ENSRNOG00000015260	ENSRNOG00000004409	ENSRNOG00000001469
ENSRNOG00000009468	ENSRNOG00000021548	ENSRNOG00000004242
ENSRNOG00000023720	ENSRNOG00000004964	ENSRNOG00000017783
ENSRNOG00000024120	ENSRNOG00000048166	ENSRNOG00000013220
ENSRNOG00000003183	ENSRNOG00000002667	ENSRNOG00000014867
ENSRNOG00000051024	ENSRNOG00000011039	ENSRNOG00000054286
ENSRNOG00000003800	ENSRNOG00000018715	ENSRNOG00000053895
ENSRNOG00000012681	ENSRNOG00000003207	ENSRNOG00000008409
ENSRNOG00000015075	ENSRNOG00000023465	ENSRNOG00000001514
ENSRNOG00000054548	ENSRNOG00000007918	ENSRNOG00000050106
ENSRNOG00000001217	ENSRNOG00000045924	ENSRNOG00000014098
ENSRNOG00000011107	ENSRNOG00000032989	ENSRNOG00000013074
ENSRNOG00000043451	ENSRNOG00000022884	ENSRNOG00000015520
ENSRNOG00000022859	ENSRNOG00000055721	ENSRNOG00000009919
ENSRNOG00000016696	ENSRNOG00000012109	ENSRNOG00000021264
ENSRNOG00000011039	ENSRNOG00000003959	ENSRNOG00000009736
ENSRNOG00000004249	ENSRNOG00000009919	ENSRNOG00000000598
ENSRNOG00000004414	ENSRNOG00000011521	ENSRNOG00000010274
ENSRNOG00000002794	ENSRNOG00000038035	ENSRNOG00000011167
ENSRNOG00000009001	ENSRNOG00000016413	ENSRNOG00000011648
ENSRNOG00000012058	ENSRNOG00000010992	ENSRNOG00000004192
ENSRNOG00000013748	ENSRNOG00000008966	ENSRNOG00000014653
ENSRNOG00000020105	ENSRNOG00000026050	ENSRNOG00000026060
ENSRNOG00000037199	ENSRNOG00000010320	ENSRNOG00000059878
ENSRNOG00000009822	ENSRNOG00000029543	ENSRNOG00000000563
ENSRNOG00000010513	ENSRNOG00000019361	ENSRNOG00000046254
ENSRNOG00000060528	ENSRNOG00000014496	ENSRNOG00000015465
ENSRNOG00000001653	ENSRNOG00000013927	ENSRNOG00000037302
ENSRNOG00000013851	ENSRNOG00000016978	ENSRNOG00000027787
ENSRNOG00000014573	ENSRNOG00000014409	ENSRNOG00000008450
ENSRNOG00000016878	ENSRNOG00000053640	ENSRNOG00000021555
ENSRNOG00000001912	ENSRNOG00000018602	ENSRNOG00000003217
ENSRNOG00000046452	ENSRNOG00000028548	ENSRNOG00000000572
ENSRNOG00000018445	ENSRNOG00000033570	ENSRNOG00000013503
ENSRNOG00000026060	ENSRNOG00000046547	ENSRNOG00000055751
ENSRNOG00000022419	ENSRNOG00000001288	ENSRNOG00000012172
ENSRNOG00000045811	ENSRNOG00000056069	ENSRNOG00000046635
ENSRNOG00000014248	ENSRNOG00000019403	ENSRNOG00000042905
ENSRNOG00000017073	ENSRNOG00000003800	ENSRNOG00000029520
ENSRNOG00000031934	ENSRNOG00000030715	ENSRNOG00000017546
ENSRNOG00000006591	ENSRNOG00000003104	ENSRNOG00000026502
ENSRNOG00000055751	ENSRNOG00000053047	ENSRNOG00000003908
ENSRNOG00000046254	ENSRNOG00000016294	ENSRNOG00000011994
ENSRNOG00000020636	ENSRNOG00000026653	ENSRNOG00000049282
ENSRNOG00000004554	ENSRNOG00000000632	ENSRNOG00000061910
ENSRNOG00000010325	ENSRNOG00000003895	ENSRNOG00000009789
ENSRNOG00000029543	ENSRNOG00000007364	ENSRNOG00000000239
ENSRNOG00000025946	ENSRNOG00000026647	ENSRNOG00000012149
ENSRNOG00000021424	ENSRNOG00000019418	ENSRNOG00000007821
ENSRNOG00000058111	ENSRNOG00000002436	ENSRNOG00000010181
ENSRNOG00000061595	ENSRNOG00000027035	ENSRNOG00000015308
ENSRNOG00000008481	ENSRNOG00000001959	ENSRNOG00000004882
ENSRNOG00000016163	ENSRNOG00000012611	ENSRNOG00000049505
ENSRNOG00000022712	ENSRNOG00000008816	ENSRNOG00000016837
ENSRNOG00000017149	ENSRNOG00000001229	ENSRNOG00000003486
ENSRNOG00000009047	ENSRNOG00000047393	ENSRNOG00000025604
ENSRNOG00000026235	ENSRNOG00000028930	ENSRNOG00000007364
ENSRNOG00000001229	ENSRNOG00000046452	ENSRNOG00000037449
ENSRNOG00000007393	ENSRNOG00000006946	ENSRNOG00000028636
ENSRNOG00000042970	ENSRNOG00000026644	ENSRNOG00000019110
ENSRNOG00000056585	ENSRNOG00000053037	ENSRNOG00000002292
ENSRNOG00000015449	ENSRNOG00000054080	ENSRNOG00000020908
ENSRNOG00000014963	ENSRNOG00000051615	ENSRNOG00000002365
ENSRNOG00000054954	ENSRNOG00000011411	ENSRNOG00000000529
ENSRNOG00000003895	ENSRNOG00000009503	ENSRNOG00000005809
ENSRNOG00000020803	ENSRNOG00000002711	ENSRNOG00000004781
ENSRNOG00000021170	ENSRNOG00000016377	ENSRNOG00000012779
ENSRNOG00000059956	ENSRNOG00000013564	ENSRNOG00000018782
ENSRNOG00000011533	ENSRNOG00000005936	ENSRNOG00000009347
ENSRNOG00000003954	ENSRNOG00000015075	ENSRNOG00000016460
ENSRNOG00000010438	ENSRNOG00000009848	ENSRNOG00000004195
ENSRNOG00000018646	ENSRNOG00000056697	ENSRNOG00000008904
ENSRNOG00000018262	ENSRNOG00000014171	ENSRNOG00000053430
ENSRNOG00000006255	ENSRNOG00000053384	ENSRNOG00000001692
ENSRNOG00000003683	ENSRNOG00000023628	ENSRNOG00000005038
ENSRNOG00000003291	ENSRNOG00000008481	ENSRNOG00000005193
ENSRNOG00000013589	ENSRNOG00000020991	ENSRNOG00000029862
ENSRNOG00000051977	ENSRNOG00000049708	ENSRNOG00000023262
ENSRNOG00000010063	ENSRNOG00000016684	ENSRNOG00000058645
ENSRNOG00000002322	ENSRNOG00000054954	ENSRNOG00000013683
ENSRNOG00000021855	ENSRNOG00000008943	ENSRNOG00000042561
ENSRNOG00000012422	ENSRNOG00000017319	ENSRNOG00000007493
ENSRNOG00000008015	ENSRNOG00000021053	ENSRNOG00000022884
ENSRNOG00000013674	ENSRNOG00000017197	ENSRNOG00000014193
ENSRNOG00000015406	ENSRNOG00000009872	ENSRNOG00000007221
ENSRNOG00000007461	ENSRNOG00000029055	ENSRNOG00000011901
ENSRNOG00000055512	ENSRNOG00000059350	ENSRNOG00000016316
ENSRNOG00000060329	ENSRNOG00000015131	ENSRNOG00000003954
ENSRNOG00000004482	ENSRNOG00000008869	ENSRNOG00000019174
ENSRNOG00000005809	ENSRNOG00000000636	ENSRNOG00000023093
ENSRNOG00000056944	ENSRNOG00000003496	ENSRNOG00000043219
ENSRNOG00000020644	ENSRNOG00000018929	ENSRNOG00000002711
ENSRNOG00000002339	ENSRNOG00000059894	ENSRNOG00000003703
ENSRNOG00000009131	ENSRNOG00000027859	ENSRNOG00000021986
ENSRNOG00000020792	ENSRNOG00000010721	ENSRNOG00000003479
ENSRNOG00000018603	ENSRNOG00000011032	ENSRNOG00000022499
ENSRNOG00000050675	ENSRNOG00000033064	ENSRNOG00000012609
ENSRNOG00000052167	ENSRNOG00000005404	ENSRNOG00000011332
ENSRNOG00000026116	ENSRNOG00000008115	ENSRNOG00000019681
ENSRNOG00000029768	ENSRNOG00000012835	ENSRNOG00000045992
ENSRNOG00000004210	ENSRNOG00000015024	ENSRNOG00000039740
ENSRNOG00000016469	ENSRNOG00000004736	ENSRNOG00000013324
ENSRNOG00000007999	ENSRNOG00000016878	ENSRNOG00000006996
ENSRNOG00000040201	ENSRNOG00000039969	ENSRNOG00000013322
ENSRNOG00000019504	ENSRNOG00000017854	ENSRNOG00000011688
ENSRNOG00000009514	ENSRNOG00000028649	ENSRNOG00000020695
ENSRNOG00000002843	ENSRNOG00000021170	ENSRNOG00000017020
ENSRNOG00000051235	ENSRNOG00000043350	ENSRNOG00000029662
ENSRNOG00000007657	ENSRNOG00000052407	ENSRNOG00000060381
ENSRNOG00000028548	ENSRNOG00000017403	ENSRNOG00000015585
ENSRNOG00000010389	ENSRNOG00000017684	ENSRNOG00000004972
ENSRNOG00000015184	ENSRNOG00000004841	ENSRNOG00000008055
ENSRNOG00000004133	ENSRNOG00000010253	ENSRNOG00000048838
ENSRNOG00000007118	ENSRNOG00000013886	ENSRNOG00000022657
ENSRNOG00000007078	ENSRNOG00000054474	ENSRNOG00000013970
ENSRNOG00000058087	ENSRNOG00000059073	ENSRNOG00000032546
ENSRNOG00000047714	ENSRNOG00000004781	ENSRNOG00000048321
ENSRNOG00000007839	ENSRNOG00000009471	ENSRNOG00000008423
ENSRNOG00000011907	ENSRNOG00000017259	ENSRNOG00000016561
ENSRNOG00000037838	ENSRNOG00000014125	ENSRNOG00000025742
ENSRNOG00000034290	ENSRNOG00000004921	ENSRNOG00000028548
ENSRNOG00000045913	ENSRNOG00000047714	ENSRNOG00000023304
ENSRNOG00000000017	ENSRNOG00000027739	ENSRNOG00000014232
ENSRNOG00000010497	ENSRNOG00000019316	ENSRNOG00000020532
ENSRNOG00000003494	ENSRNOG00000036960	ENSRNOG00000043076
ENSRNOG00000058856	ENSRNOG00000018113	ENSRNOG00000024008
ENSRNOG00000017197	ENSRNOG00000049560	ENSRNOG00000032813
ENSRNOG00000002593	ENSRNOG00000000855	ENSRNOG00000019147
ENSRNOG00000032626	ENSRNOG00000019270	ENSRNOG00000013949
ENSRNOG00000027739	ENSRNOG00000021560	ENSRNOG00000002773
ENSRNOG00000032002	ENSRNOG00000010695	ENSRNOG00000007905
ENSRNOG00000010375	ENSRNOG00000017156	ENSRNOG00000004232
ENSRNOG00000002916	ENSRNOG00000014964	ENSRNOG00000012303
ENSRNOG00000003687	ENSRNOG00000004473	ENSRNOG00000012486
ENSRNOG00000018257	ENSRNOG00000020014	ENSRNOG00000015878
ENSRNOG00000003300	ENSRNOG00000048321	ENSRNOG00000029543
ENSRNOG00000018454	ENSRNOG00000003669	ENSRNOG00000059857
ENSRNOG00000004322	ENSRNOG00000001557	ENSRNOG00000011498
ENSRNOG00000004198	ENSRNOG00000013748	ENSRNOG00000009822
ENSRNOG00000008086	ENSRNOG00000022839	ENSRNOG00000003800
ENSRNOG00000019181	ENSRNOG00000020699	ENSRNOG00000001959
ENSRNOG00000000442	ENSRNOG00000052725	ENSRNOG00000007457
ENSRNOG00000007364	ENSRNOG00000004198	ENSRNOG00000006231
ENSRNOG00000025691	ENSRNOG00000012721	ENSRNOG00000010058
ENSRNOG00000010883	ENSRNOG00000007690	ENSRNOG00000020369
ENSRNOG00000053430	ENSRNOG00000001963	ENSRNOG00000043416
ENSRNOG00000017539	ENSRNOG00000004583	ENSRNOG00000022839
ENSRNOG00000008869	ENSRNOG00000023943	ENSRNOG00000007286
ENSRNOG00000017109	ENSRNOG00000033921	ENSRNOG00000057458
ENSRNOG00000021243	ENSRNOG00000003748	ENSRNOG00000016708
ENSRNOG00000013683	ENSRNOG00000006715	ENSRNOG00000036839
ENSRNOG00000020407	ENSRNOG00000008165	ENSRNOG00000008447
ENSRNOG00000054049	ENSRNOG00000008904	ENSRNOG00000013005
ENSRNOG00000004448	ENSRNOG00000019100	ENSRNOG00000047781
ENSRNOG00000061544	ENSRNOG00000061376	ENSRNOG00000020173
ENSRNOG00000012495	ENSRNOG00000046829	ENSRNOG00000016888
ENSRNOG00000019549	ENSRNOG00000020953	ENSRNOG00000025302
ENSRNOG00000027357	ENSRNOG00000000658	ENSRNOG00000031993
ENSRNOG00000008048	ENSRNOG00000017311	ENSRNOG00000012294
ENSRNOG00000013707	ENSRNOG00000017063	ENSRNOG00000038789
ENSRNOG00000022256	ENSRNOG00000051619	ENSRNOG00000006946
ENSRNOG00000014231	ENSRNOG00000015618	ENSRNOG00000009522
ENSRNOG00000019365	ENSRNOG00000001158	ENSRNOG00000015211
ENSRNOG00000030776	ENSRNOG00000018254	ENSRNOG00000054251
ENSRNOG00000013532	ENSRNOG00000038746	ENSRNOG00000014615
ENSRNOG00000007896	ENSRNOG00000001216	ENSRNOG00000005392
ENSRNOG00000019363	ENSRNOG00000014202	ENSRNOG00000060021
ENSRNOG00000042312	ENSRNOG00000049351	ENSRNOG00000004861
ENSRNOG00000004019	ENSRNOG00000016724	ENSRNOG00000017226
ENSRNOG00000056826	ENSRNOG00000002610	ENSRNOG00000053037
ENSRNOG00000042821	ENSRNOG00000003442	ENSRNOG00000021670
ENSRNOG00000011245	ENSRNOG00000010386	ENSRNOG00000008091
ENSRNOG00000011521	ENSRNOG00000037409	ENSRNOG00000052574
ENSRNOG00000001431	ENSRNOG00000059207	ENSRNOG00000005934
ENSRNOG00000029698	ENSRNOG00000023536	ENSRNOG00000012534
ENSRNOG00000032396	ENSRNOG00000009445	ENSRNOG00000026108
ENSRNOG00000020136	ENSRNOG00000059900	ENSRNOG00000032516
ENSRNOG00000017250	ENSRNOG00000033256	ENSRNOG00000021161
ENSRNOG00000027859	ENSRNOG00000016372	ENSRNOG00000004440
ENSRNOG00000009870	ENSRNOG00000046133	ENSRNOG00000019208
ENSRNOG00000006320	ENSRNOG00000031431	ENSRNOG00000033736
ENSRNOG00000020446	ENSRNOG00000000479	ENSRNOG00000021548
ENSRNOG00000002385	ENSRNOG00000005818	ENSRNOG00000020906
ENSRNOG00000007951	ENSRNOG00000005575	ENSRNOG00000001833
ENSRNOG00000011800	ENSRNOG00000003209	ENSRNOG00000030285
ENSRNOG00000051158	ENSRNOG00000016123	ENSRNOG00000010253
ENSRNOG00000033722	ENSRNOG00000023803	ENSRNOG00000016838
ENSRNOG00000016581	ENSRNOG00000057760	ENSRNOG00000059140
ENSRNOG00000019048	ENSRNOG00000009822	ENSRNOG00000022565
ENSRNOG00000046858	ENSRNOG00000021433	ENSRNOG00000005404
ENSRNOG00000009222	ENSRNOG00000039183	ENSRNOG00000038140
ENSRNOG00000023338	ENSRNOG00000060356	ENSRNOG00000039284
ENSRNOG00000028801	ENSRNOG00000004772	ENSRNOG00000057759
ENSRNOG00000031851	ENSRNOG00000012083	ENSRNOG00000005153
ENSRNOG00000008615	ENSRNOG00000012804	ENSRNOG00000003207
ENSRNOG00000000378	ENSRNOG00000007030	ENSRNOG00000011977
ENSRNOG00000036960	ENSRNOG00000011820	ENSRNOG00000032339
ENSRNOG00000039593	ENSRNOG00000005659	ENSRNOG00000006661
ENSRNOG00000004736	ENSRNOG00000013000	ENSRNOG00000008942
ENSRNOG00000007229	ENSRNOG00000018517	ENSRNOG00000002667
ENSRNOG00000050792	ENSRNOG00000000515	ENSRNOG00000003673
ENSRNOG00000021084	ENSRNOG00000042741	ENSRNOG00000000443
ENSRNOG00000014233	ENSRNOG00000018740	ENSRNOG00000002579
ENSRNOG00000004110	ENSRNOG00000031643	ENSRNOG00000004409
ENSRNOG00000006231	ENSRNOG00000013747	ENSRNOG00000024931
ENSRNOG00000016242	ENSRNOG00000037199	ENSRNOG00000001457
ENSRNOG00000007350	ENSRNOG00000055111	ENSRNOG00000009263
ENSRNOG00000011145	ENSRNOG00000004322	ENSRNOG00000005807
ENSRNOG00000052188	ENSRNOG00000018551	ENSRNOG00000061595
ENSRNOG00000016496	ENSRNOG00000001757	ENSRNOG00000033064
ENSRNOG00000021004	ENSRNOG00000058539	ENSRNOG00000031916
ENSRNOG00000023861	ENSRNOG00000039204	ENSRNOG00000028945
ENSRNOG00000020953	ENSRNOG00000046184	ENSRNOG00000008045
ENSRNOG00000031443	ENSRNOG00000029938	ENSRNOG00000019627
ENSRNOG00000018094	ENSRNOG00000007142	ENSRNOG00000006921
ENSRNOG00000002460	ENSRNOG00000013683	ENSRNOG00000053026
ENSRNOG00000026226	ENSRNOG00000032929	ENSRNOG00000023536
ENSRNOG00000037198	ENSRNOG00000049410	ENSRNOG00000024677
ENSRNOG00000021669	ENSRNOG00000000251	ENSRNOG00000054080
ENSRNOG00000009005	ENSRNOG00000047854	ENSRNOG00000056359
ENSRNOG00000013318	ENSRNOG00000006224	ENSRNOG00000007159
ENSRNOG00000004483	ENSRNOG00000021468	ENSRNOG00000016878
ENSRNOG00000046007	ENSRNOG00000024677	ENSRNOG00000008465
ENSRNOG00000014653	ENSRNOG00000012067	ENSRNOG00000008481
ENSRNOG00000059073	ENSRNOG00000022764	ENSRNOG00000020006
ENSRNOG00000004964	ENSRNOG00000008180	ENSRNOG00000016148
ENSRNOG00000038999	ENSRNOG00000032703	ENSRNOG00000061403
ENSRNOG00000061868	ENSRNOG00000014232	ENSRNOG00000000818
ENSRNOG00000004781	ENSRNOG00000015717	ENSRNOG00000054344
ENSRNOG00000059660	ENSRNOG00000023162	ENSRNOG00000021157
ENSRNOG00000016177	ENSRNOG00000042825	ENSRNOG00000006236
ENSRNOG00000001757	ENSRNOG00000009211	ENSRNOG00000013564
ENSRNOG00000061857	ENSRNOG00000010325	ENSRNOG00000023360
ENSRNOG00000018715	ENSRNOG00000056457	ENSRNOG00000019890
ENSRNOG00000021130	ENSRNOG00000003866	ENSRNOG00000002105
ENSRNOG00000000552	ENSRNOG00000018092	ENSRNOG00000005907
ENSRNOG00000004275	ENSRNOG00000001259	ENSRNOG00000007665
ENSRNOG00000013167	ENSRNOG00000015529	ENSRNOG00000000699
ENSRNOG00000018752	ENSRNOG00000048449	ENSRNOG00000056226
ENSRNOG00000019445	ENSRNOG00000000894	ENSRNOG00000032989
ENSRNOG00000026344	ENSRNOG00000000373	ENSRNOG00000010319
ENSRNOG00000015717	ENSRNOG00000014538	ENSRNOG00000021644
ENSRNOG00000022298	ENSRNOG00000039390	ENSRNOG00000017156
ENSRNOG00000000658	ENSRNOG00000006167	ENSRNOG00000002794
ENSRNOG00000004089	ENSRNOG00000033134	ENSRNOG00000002153
ENSRNOG00000021098	ENSRNOG00000051002	ENSRNOG00000006715
ENSRNOG00000033564	ENSRNOG00000019110	ENSRNOG00000006926
ENSRNOG00000023209	ENSRNOG00000012058	ENSRNOG00000036829
ENSRNOG00000024114	ENSRNOG00000008570	ENSRNOG00000009266
ENSRNOG00000016716	ENSRNOG00000046050	ENSRNOG00000001557
ENSRNOG00000010266	ENSRNOG00000001518	ENSRNOG00000017777
ENSRNOG00000017484	ENSRNOG00000024650	ENSRNOG00000005788
ENSRNOG00000014496	ENSRNOG00000028566	ENSRNOG00000040108
ENSRNOG00000002922	ENSRNOG00000011683	ENSRNOG00000005378
ENSRNOG00000021157	ENSRNOG00000013503	ENSRNOG00000050869
ENSRNOG00000001518	ENSRNOG00000000569	ENSRNOG00000024043
ENSRNOG00000006224	ENSRNOG00000014130	ENSRNOG00000057058
ENSRNOG00000047230	ENSRNOG00000018382	ENSRNOG00000024266
ENSRNOG00000012779	ENSRNOG00000010045	ENSRNOG00000028225
ENSRNOG00000056226	ENSRNOG00000029768	ENSRNOG00000028611
ENSRNOG00000003748	ENSRNOG00000021847	ENSRNOG00000015255
ENSRNOG00000033940	ENSRNOG00000057189	ENSRNOG00000021469
ENSRNOG00000049695	ENSRNOG00000006952	ENSRNOG00000046788
ENSRNOG00000006076	ENSRNOG00000009260	ENSRNOG00000036960
ENSRNOG00000018028	ENSRNOG00000017560	ENSRNOG00000019278
ENSRNOG00000004854	ENSRNOG00000042970	ENSRNOG00000021128
ENSRNOG00000043085	ENSRNOG00000011562	ENSRNOG00000019404
ENSRNOG00000038616	ENSRNOG00000019048	ENSRNOG00000005410
ENSRNOG00000000588	ENSRNOG00000010906	ENSRNOG00000009935
ENSRNOG00000056894	ENSRNOG00000007906	ENSRNOG00000037225
ENSRNOG00000017773	ENSRNOG00000031443	ENSRNOG00000030034
ENSRNOG00000011696	ENSRNOG00000005214	ENSRNOG00000017197
ENSRNOG00000017277	ENSRNOG00000009826	ENSRNOG00000001501
ENSRNOG00000011205	ENSRNOG00000004479	ENSRNOG00000011205
ENSRNOG00000019850	ENSRNOG00000013057	ENSRNOG00000001134
ENSRNOG00000000815	ENSRNOG00000000500	ENSRNOG00000025587
ENSRNOG00000021100	ENSRNOG00000019365	ENSRNOG00000009872
ENSRNOG00000005465	ENSRNOG00000049491	ENSRNOG00000021100
ENSRNOG00000024843	ENSRNOG00000054964	ENSRNOG00000028930
ENSRNOG00000000487	ENSRNOG00000022911	ENSRNOG00000012422
ENSRNOG00000014886	ENSRNOG00000053026	ENSRNOG00000058983
ENSRNOG00000028733	ENSRNOG00000045998	ENSRNOG00000030351
ENSRNOG00000026653	ENSRNOG00000008930	ENSRNOG00000013474
ENSRNOG00000017319	ENSRNOG00000000239	ENSRNOG00000001276
ENSRNOG00000021752	ENSRNOG00000036728	ENSRNOG00000004322
ENSRNOG00000010763	ENSRNOG00000024428	ENSRNOG00000036687
ENSRNOG00000010661	ENSRNOG00000004679	ENSRNOG00000020013
ENSRNOG00000015071	ENSRNOG00000061070	ENSRNOG00000023720
ENSRNOG00000021474	ENSRNOG00000029308	ENSRNOG00000006619
ENSRNOG00000023628	ENSRNOG00000030467	ENSRNOG00000016163
ENSRNOG00000003802	ENSRNOG00000011777	ENSRNOG00000001111
ENSRNOG00000042741	ENSRNOG00000009334	ENSRNOG00000039949
ENSRNOG00000017680	ENSRNOG00000015260	ENSRNOG00000017786
ENSRNOG00000011820	ENSRNOG00000004575	ENSRNOG00000016978
ENSRNOG00000009370	ENSRNOG00000050675	ENSRNOG00000006324
ENSRNOG00000061630	ENSRNOG00000011688	ENSRNOG00000017919
ENSRNOG00000045733	ENSRNOG00000027736	ENSRNOG00000046479
ENSRNOG00000019560	ENSRNOG00000015380	ENSRNOG00000055648
ENSRNOG00000023005	ENSRNOG00000012422	ENSRNOG00000008966
ENSRNOG00000000168	ENSRNOG00000028259	ENSRNOG00000030187
ENSRNOG00000020173	ENSRNOG00000009951	ENSRNOG00000049115
ENSRNOG00000013128	ENSRNOG00000029191	ENSRNOG00000010694
ENSRNOG00000019728	ENSRNOG00000016525	ENSRNOG00000013922
ENSRNOG00000056714	ENSRNOG00000002278	ENSRNOG00000015948
ENSRNOG00000016945	ENSRNOG00000001217	ENSRNOG00000037295
ENSRNOG00000020845	ENSRNOG00000055527	ENSRNOG00000048725
ENSRNOG00000061403	ENSRNOG00000019620	ENSRNOG00000000866
ENSRNOG00000021272	ENSRNOG00000049878	ENSRNOG00000009892
ENSRNOG00000017850	ENSRNOG00000002273	ENSRNOG00000058337
ENSRNOG00000010999	ENSRNOG00000013309	ENSRNOG00000017575
ENSRNOG00000017063	ENSRNOG00000011205	ENSRNOG00000008841
ENSRNOG00000020097	ENSRNOG00000005810	ENSRNOG00000013973
ENSRNOG00000060633	ENSRNOG00000009401	ENSRNOG00000014143
ENSRNOG00000024043	ENSRNOG00000012749	ENSRNOG00000008846
ENSRNOG00000059625	ENSRNOG00000018815	ENSRNOG00000059073
ENSRNOG00000056746	ENSRNOG00000021098	ENSRNOG00000001431
ENSRNOG00000015232	ENSRNOG00000010378	ENSRNOG00000037514
ENSRNOG00000004311	ENSRNOG00000019412	ENSRNOG00000011562
ENSRNOG00000004440	ENSRNOG00000022419	ENSRNOG00000002459
ENSRNOG00000037632	ENSRNOG00000016225	ENSRNOG00000004473
ENSRNOG00000018839	ENSRNOG00000050996	ENSRNOG00000061358
ENSRNOG00000015024	ENSRNOG00000043199	ENSRNOG00000021560
ENSRNOG00000001216	ENSRNOG00000002950	ENSRNOG00000047218
ENSRNOG00000013654	ENSRNOG00000003388	ENSRNOG00000054560
ENSRNOG00000020685	ENSRNOG00000020875	ENSRNOG00000016326
ENSRNOG00000043068	ENSRNOG00000013727	ENSRNOG00000060528
ENSRNOG00000004610	ENSRNOG00000006932	ENSRNOG00000009726
ENSRNOG00000031136	ENSRNOG00000003479	ENSRNOG00000050430
ENSRNOG00000017414	ENSRNOG00000011107	ENSRNOG00000046184
ENSRNOG00000008412	ENSRNOG00000010777	ENSRNOG00000033772
ENSRNOG00000005404	ENSRNOG00000022637	ENSRNOG00000019229
ENSRNOG00000013503	ENSRNOG00000061910	ENSRNOG00000046547
ENSRNOG00000028189	ENSRNOG00000039744	ENSRNOG00000028801
ENSRNOG00000016070	ENSRNOG00000027894	ENSRNOG00000005053
ENSRNOG00000023337	ENSRNOG00000052498	ENSRNOG00000021272
ENSRNOG00000056359	ENSRNOG00000007159	ENSRNOG00000033893
ENSRNOG00000011300	ENSRNOG00000000383	ENSRNOG00000013411
ENSRNOG00000054251	ENSRNOG00000013663	ENSRNOG00000050233
ENSRNOG00000018760	ENSRNOG00000017511	ENSRNOG00000030930
ENSRNOG00000052070	ENSRNOG00000004133	ENSRNOG00000001128
ENSRNOG00000061215	ENSRNOG00000020807	ENSRNOG00000013148
ENSRNOG00000047491	ENSRNOG00000002593	ENSRNOG00000016123
ENSRNOG00000059949	ENSRNOG00000022298	ENSRNOG00000053232
ENSRNOG00000017684	ENSRNOG00000016945	ENSRNOG00000033570
ENSRNOG00000007993	ENSRNOG00000017021	ENSRNOG00000033220
ENSRNOG00000019869	ENSRNOG00000015308	ENSRNOG00000028677
ENSRNOG00000060460	ENSRNOG00000049115	ENSRNOG00000007918
ENSRNOG00000055564	ENSRNOG00000018760	ENSRNOG00000006956
ENSRNOG00000050767	ENSRNOG00000061895	ENSRNOG00000012782
ENSRNOG00000058337	ENSRNOG00000001908	ENSRNOG00000016225
ENSRNOG00000005807	ENSRNOG00000017539	ENSRNOG00000020701
ENSRNOG00000033017	ENSRNOG00000060100	ENSRNOG00000042139
ENSRNOG00000003622	ENSRNOG00000042753	ENSRNOG00000002203
ENSRNOG00000007545	ENSRNOG00000033564	ENSRNOG00000004420
ENSRNOG00000023428	ENSRNOG00000002428	ENSRNOG00000013589
ENSRNOG00000026134	ENSRNOG00000018603	ENSRNOG00000020452
ENSRNOG00000019620	ENSRNOG00000008880	ENSRNOG00000014656
ENSRNOG00000052190	ENSRNOG00000003259	ENSRNOG00000014703
ENSRNOG00000009826	ENSRNOG00000009339	ENSRNOG00000017684
ENSRNOG00000013867	ENSRNOG00000018669	ENSRNOG00000022030
ENSRNOG00000004155	ENSRNOG00000018454	ENSRNOG00000008489
ENSRNOG00000000321	ENSRNOG00000012294	ENSRNOG00000015796
ENSRNOG00000030771	ENSRNOG00000012989	ENSRNOG00000020105
ENSRNOG00000046184	ENSRNOG00000005082	ENSRNOG00000053288
ENSRNOG00000008591	ENSRNOG00000006198	ENSRNOG00000052038
ENSRNOG00000061508	ENSRNOG00000033693	ENSRNOG00000017581
ENSRNOG00000024923	ENSRNOG00000004483	ENSRNOG00000001687
ENSRNOG00000057141	ENSRNOG00000014610	ENSRNOG00000001816
ENSRNOG00000037435	ENSRNOG00000028743	ENSRNOG00000012721
ENSRNOG00000025981	ENSRNOG00000004232	ENSRNOG00000024159
ENSRNOG00000024065	ENSRNOG00000050819	ENSRNOG00000010999
ENSRNOG00000059207	ENSRNOG00000029195	ENSRNOG00000039390
ENSRNOG00000033064	ENSRNOG00000054860	ENSRNOG00000000853
ENSRNOG00000009197	ENSRNOG00000005037	ENSRNOG00000013304
ENSRNOG00000007827	ENSRNOG00000033017	ENSRNOG00000014513
ENSRNOG00000051285	ENSRNOG00000007896	ENSRNOG00000003832
ENSRNOG00000004158	ENSRNOG00000056944	ENSRNOG00000001752
ENSRNOG00000038881	ENSRNOG00000028137	ENSRNOG00000006934
ENSRNOG00000059997	ENSRNOG00000018257	ENSRNOG00000026134
ENSRNOG00000021199	ENSRNOG00000017819	ENSRNOG00000011039
ENSRNOG00000021255	ENSRNOG00000015921	ENSRNOG00000011154
ENSRNOG00000020836	ENSRNOG00000036692	ENSRNOG00000008144
ENSRNOG00000054438	ENSRNOG00000002134	ENSRNOG00000010266
ENSRNOG00000004870	ENSRNOG00000009005	ENSRNOG00000003123
ENSRNOG00000029107	ENSRNOG00000058087	ENSRNOG00000010507
ENSRNOG00000045764	ENSRNOG00000038835	ENSRNOG00000016013
ENSRNOG00000060391	ENSRNOG00000023337	ENSRNOG00000004263
ENSRNOG00000028259	ENSRNOG00000000168	ENSRNOG00000048660
ENSRNOG00000008465	ENSRNOG00000029510	ENSRNOG00000013987
ENSRNOG00000026679	ENSRNOG00000056359	ENSRNOG00000032396
ENSRNOG00000019890	ENSRNOG00000039571	ENSRNOG00000036677
ENSRNOG00000003284	ENSRNOG00000006204	ENSRNOG00000012827
ENSRNOG00000017403	ENSRNOG00000010575	ENSRNOG00000014524
ENSRNOG00000012956	ENSRNOG00000016679	ENSRNOG00000006108
ENSRNOG00000058195	ENSRNOG00000060703	ENSRNOG00000027859
ENSRNOG00000007918	ENSRNOG00000014248	ENSRNOG00000025892
ENSRNOG00000014505	ENSRNOG00000042460	ENSRNOG00000008825
ENSRNOG00000008575	ENSRNOG00000021255	ENSRNOG00000028016
ENSRNOG00000009425	ENSRNOG00000051258	ENSRNOG00000016413
ENSRNOG00000003144	ENSRNOG00000004649	ENSRNOG00000000122
ENSRNOG00000021802	ENSRNOG00000033220	ENSRNOG00000030568
ENSRNOG00000019019	ENSRNOG00000015406	ENSRNOG00000059276
ENSRNOG00000049192	ENSRNOG00000013867	ENSRNOG00000010620
ENSRNOG00000045992	ENSRNOG00000004972	ENSRNOG00000031163
ENSRNOG00000010777	ENSRNOG00000012512	ENSRNOG00000021412
ENSRNOG00000010450	ENSRNOG00000027808	ENSRNOG00000020078
ENSRNOG00000002592	ENSRNOG00000019926	ENSRNOG00000005620
ENSRNOG00000020441	ENSRNOG00000056894	ENSRNOG00000009260
ENSRNOG00000024390	ENSRNOG00000014080	ENSRNOG00000051623
ENSRNOG00000008570	ENSRNOG00000061215	ENSRNOG00000018092
ENSRNOG00000048874	ENSRNOG00000000394	ENSRNOG00000019977
ENSRNOG00000047800	ENSRNOG00000019737	ENSRNOG00000005274
ENSRNOG00000019689	ENSRNOG00000015275	ENSRNOG00000013898
ENSRNOG00000015599	ENSRNOG00000024120	ENSRNOG00000008956
ENSRNOG00000053272	ENSRNOG00000051163	ENSRNOG00000023410
ENSRNOG00000024730	ENSRNOG00000001825	ENSRNOG00000002012
ENSRNOG00000007345	ENSRNOG00000018297	ENSRNOG00000006541
ENSRNOG00000049513	ENSRNOG00000021345	ENSRNOG00000014634
ENSRNOG00000054218	ENSRNOG00000000563	ENSRNOG00000001647
ENSRNOG00000033744	ENSRNOG00000019141	ENSRNOG00000033217
ENSRNOG00000024931	ENSRNOG00000058446	ENSRNOG00000010071
ENSRNOG00000008045	ENSRNOG00000014886	ENSRNOG00000000815
ENSRNOG00000009848	ENSRNOG00000043085	ENSRNOG00000002618
ENSRNOG00000054136	ENSRNOG00000046763	ENSRNOG00000018615
ENSRNOG00000000488	ENSRNOG00000008027	ENSRNOG00000046191
ENSRNOG00000030729	ENSRNOG00000053691	ENSRNOG00000046492
ENSRNOG00000006715	ENSRNOG00000015616	ENSRNOG00000002947
ENSRNOG00000039110	ENSRNOG00000048088	ENSRNOG00000016278
ENSRNOG00000005037	ENSRNOG00000046195	ENSRNOG00000046153
ENSRNOG00000049766	ENSRNOG00000012318	ENSRNOG00000004610
ENSRNOG00000010018	ENSRNOG00000014837	ENSRNOG00000010320
ENSRNOG00000057696	ENSRNOG00000022499	ENSRNOG00000050697
ENSRNOG00000018382	ENSRNOG00000003947	ENSRNOG00000001250
ENSRNOG00000008065	ENSRNOG00000012183	ENSRNOG00000003084
ENSRNOG00000000860	ENSRNOG00000025587	ENSRNOG00000023708
ENSRNOG00000015329	ENSRNOG00000017073	ENSRNOG00000014125
ENSRNOG00000001288	ENSRNOG00000019549	ENSRNOG00000019689
ENSRNOG00000005215	ENSRNOG00000003144	ENSRNOG00000019361
ENSRNOG00000021469	ENSRNOG00000053260	ENSRNOG00000010516
ENSRNOG00000020860	ENSRNOG00000006934	ENSRNOG00000016700
ENSRNOG00000009331	ENSRNOG00000007827	ENSRNOG00000014409
ENSRNOG00000003694	ENSRNOG00000012827	ENSRNOG00000016249
ENSRNOG00000032832	ENSRNOG00000051216	ENSRNOG00000046327
ENSRNOG00000017511	ENSRNOG00000048771	ENSRNOG00000021179
ENSRNOG00000019306	ENSRNOG00000053113	ENSRNOG00000029308
ENSRNOG00000061530	ENSRNOG00000015794	ENSRNOG00000004583
ENSRNOG00000000636	ENSRNOG00000003835	ENSRNOG00000059968
ENSRNOG00000002773	ENSRNOG00000056550	ENSRNOG00000002832
ENSRNOG00000026203	ENSRNOG00000059625	ENSRNOG00000021248
ENSRNOG00000003866	ENSRNOG00000001187	ENSRNOG00000004332
ENSRNOG00000026770	ENSRNOG00000016640	ENSRNOG00000042230
ENSRNOG00000001959	ENSRNOG00000020013	ENSRNOG00000026605
ENSRNOG00000010731	ENSRNOG00000013231	ENSRNOG00000001217
ENSRNOG00000015810	ENSRNOG00000032002	ENSRNOG00000003616
ENSRNOG00000024077	ENSRNOG00000022712	ENSRNOG00000008758
ENSRNOG00000025587	ENSRNOG00000028768	ENSRNOG00000027606
ENSRNOG00000029980	ENSRNOG00000054548	ENSRNOG00000012735
ENSRNOG00000060867	ENSRNOG00000059097	ENSRNOG00000049614
ENSRNOG00000006030	ENSRNOG00000010763	ENSRNOG00000005287
ENSRNOG00000003170	ENSRNOG00000021474	ENSRNOG00000022320
ENSRNOG00000025143	ENSRNOG00000007706	ENSRNOG00000027360
ENSRNOG00000029938	ENSRNOG00000020441	ENSRNOG00000027109
ENSRNOG00000000394	ENSRNOG00000060528	ENSRNOG00000012956
ENSRNOG00000021433	ENSRNOG00000020505	ENSRNOG00000003785
ENSRNOG00000047505	ENSRNOG00000003251	ENSRNOG00000018198
ENSRNOG00000046949	ENSRNOG00000003217	ENSRNOG00000021170
ENSRNOG00000038835	ENSRNOG00000014705	ENSRNOG00000004216
ENSRNOG00000057082	ENSRNOG00000010071	ENSRNOG00000012495
ENSRNOG00000049425	ENSRNOG00000020129	ENSRNOG00000049452
ENSRNOG00000001963	ENSRNOG00000013415	ENSRNOG00000003726
ENSRNOG00000020077	ENSRNOG00000001869	ENSRNOG00000005024
ENSRNOG00000059698	ENSRNOG00000061394	ENSRNOG00000008180
ENSRNOG00000016123	ENSRNOG00000058545	ENSRNOG00000050910
ENSRNOG00000014761	ENSRNOG00000061595	ENSRNOG00000017421
ENSRNOG00000010906	ENSRNOG00000020407	ENSRNOG00000022537
ENSRNOG00000016248	ENSRNOG00000024178	ENSRNOG00000031443
ENSRNOG00000001006	ENSRNOG00000058993	ENSRNOG00000018254
ENSRNOG00000020203	ENSRNOG00000019494	ENSRNOG00000009385
ENSRNOG00000018782	ENSRNOG00000014573	ENSRNOG00000038200
ENSRNOG00000032328	ENSRNOG00000057141	ENSRNOG00000013971
ENSRNOG00000033059	ENSRNOG00000032178	ENSRNOG00000003929
ENSRNOG00000046663	ENSRNOG00000050910	ENSRNOG00000049782
ENSRNOG00000006645	ENSRNOG00000006731	ENSRNOG00000061216
ENSRNOG00000015465	ENSRNOG00000059765	ENSRNOG00000047491
ENSRNOG00000016148	ENSRNOG00000023093	ENSRNOG00000053640
ENSRNOG00000026466	ENSRNOG00000001912	ENSRNOG00000015896
ENSRNOG00000022975	ENSRNOG00000043176	ENSRNOG00000012058
ENSRNOG00000024159	ENSRNOG00000007372	ENSRNOG00000002922
ENSRNOG00000046231	ENSRNOG00000005038	ENSRNOG00000016308
ENSRNOG00000008666	ENSRNOG00000000811	ENSRNOG00000020679
ENSRNOG00000048166	ENSRNOG00000025094	ENSRNOG00000009598
ENSRNOG00000050996	ENSRNOG00000000572	ENSRNOG00000038375
ENSRNOG00000061160	ENSRNOG00000017897	ENSRNOG00000000459
ENSRNOG00000037331	ENSRNOG00000015184	ENSRNOG00000018411
ENSRNOG00000017897	ENSRNOG00000006591	ENSRNOG00000050792
ENSRNOG00000015082	ENSRNOG00000050968	ENSRNOG00000017930
ENSRNOG00000021345	ENSRNOG00000008947	ENSRNOG00000009245
ENSRNOG00000008091	ENSRNOG00000024390	ENSRNOG00000019181
ENSRNOG00000016957	ENSRNOG00000006641	ENSRNOG00000029195
ENSRNOG00000003189	ENSRNOG00000007457	ENSRNOG00000053239
ENSRNOG00000003893	ENSRNOG00000016242	ENSRNOG00000003399
ENSRNOG00000056580	ENSRNOG00000013069	ENSRNOG00000010794
ENSRNOG00000024190	ENSRNOG00000007951	ENSRNOG00000016134
ENSRNOG00000025502	ENSRNOG00000010731	ENSRNOG00000005825
ENSRNOG00000018350	ENSRNOG00000042944	ENSRNOG00000008738
ENSRNOG00000000165	ENSRNOG00000047491	ENSRNOG00000011932
ENSRNOG00000043057	ENSRNOG00000003694	ENSRNOG00000043068
ENSRNOG00000032178	ENSRNOG00000020743	ENSRNOG00000006079
ENSRNOG00000017332	ENSRNOG00000015411	ENSRNOG00000002244
ENSRNOG00000007270	ENSRNOG00000033217	ENSRNOG00000017129
ENSRNOG00000017002	ENSRNOG00000008099	ENSRNOG00000010086
ENSRNOG00000038980	ENSRNOG00000022426	ENSRNOG00000015550
ENSRNOG00000024677	ENSRNOG00000060087	ENSRNOG00000009951
ENSRNOG00000057347	ENSRNOG00000005046	ENSRNOG00000013886
ENSRNOG00000043419	ENSRNOG00000059456	ENSRNOG00000020394
ENSRNOG00000001369	ENSRNOG00000039582	ENSRNOG00000020716
ENSRNOG00000050819	ENSRNOG00000018778	ENSRNOG00000055527
ENSRNOG00000051163	ENSRNOG00000059500	ENSRNOG00000012787
ENSRNOG00000012222	ENSRNOG00000009047	ENSRNOG00000019854
ENSRNOG00000010205	ENSRNOG00000025981	ENSRNOG00000023428
ENSRNOG00000024798	ENSRNOG00000018858	ENSRNOG00000024390
ENSRNOG00000013564	ENSRNOG00000026466	ENSRNOG00000025981
ENSRNOG00000010386	ENSRNOG00000030729	ENSRNOG00000022298
ENSRNOG00000008115	ENSRNOG00000017680	ENSRNOG00000013927
ENSRNOG00000005700	ENSRNOG00000047230	ENSRNOG00000053468
ENSRNOG00000009334	ENSRNOG00000015449	ENSRNOG00000000515
ENSRNOG00000039183	ENSRNOG00000002599	ENSRNOG00000011448
ENSRNOG00000038746	ENSRNOG00000027880	ENSRNOG00000003895
ENSRNOG00000024523	ENSRNOG00000006738	ENSRNOG00000048949
ENSRNOG00000053026	ENSRNOG00000000321	ENSRNOG00000056697
ENSRNOG00000003705	ENSRNOG00000054033	ENSRNOG00000010017
ENSRNOG00000003028	ENSRNOG00000015382	ENSRNOG00000002946
ENSRNOG00000023601	ENSRNOG00000025143	ENSRNOG00000027355
ENSRNOG00000021200	ENSRNOG00000028801	ENSRNOG00000011815
ENSRNOG00000019958	ENSRNOG00000007764	ENSRNOG00000007291
ENSRNOG00000030930	ENSRNOG00000002014	ENSRNOG00000014171
ENSRNOG00000000768	ENSRNOG00000000525	ENSRNOG00000058476
ENSRNOG00000058375	ENSRNOG00000026518	ENSRNOG00000026116
ENSRNOG00000019412	ENSRNOG00000006978	ENSRNOG00000050675
ENSRNOG00000049708	ENSRNOG00000025406	ENSRNOG00000014294
ENSRNOG00000009531	ENSRNOG00000007925	ENSRNOG00000019430
ENSRNOG00000016358	ENSRNOG00000027468	ENSRNOG00000007436
ENSRNOG00000060235	ENSRNOG00000001653	ENSRNOG00000033693
ENSRNOG00000055111	ENSRNOG00000004275	ENSRNOG00000004063
ENSRNOG00000015411	ENSRNOG00000019662	ENSRNOG00000003949
ENSRNOG00000039530	ENSRNOG00000017181	ENSRNOG00000058288
ENSRNOG00000009539	ENSRNOG00000015071	ENSRNOG00000013321
ENSRNOG00000008203	ENSRNOG00000004861	ENSRNOG00000045999
ENSRNOG00000018929	ENSRNOG00000038771	ENSRNOG00000016067
ENSRNOG00000004084	ENSRNOG00000000768	ENSRNOG00000006932
ENSRNOG00000015614	ENSRNOG00000020644	ENSRNOG00000042451
ENSRNOG00000020084	ENSRNOG00000010507	ENSRNOG00000037221
ENSRNOG00000004676	ENSRNOG00000006824	ENSRNOG00000023803
ENSRNOG00000004678	ENSRNOG00000019937	ENSRNOG00000029191
ENSRNOG00000012083	ENSRNOG00000005565	ENSRNOG00000013215
ENSRNOG00000010213	ENSRNOG00000019308	ENSRNOG00000057141
ENSRNOG00000033575	ENSRNOG00000000443	ENSRNOG00000002511
ENSRNOG00000016978	ENSRNOG00000020097	ENSRNOG00000024346
ENSRNOG00000060100	ENSRNOG00000003486	ENSRNOG00000047287
ENSRNOG00000048169	ENSRNOG00000011120	ENSRNOG00000008806
ENSRNOG00000014264	ENSRNOG00000003785	ENSRNOG00000013748
ENSRNOG00000007925	ENSRNOG00000019050	ENSRNOG00000037331
ENSRNOG00000003208	ENSRNOG00000004461	ENSRNOG00000014851
ENSRNOG00000042105	ENSRNOG00000015878	ENSRNOG00000020719
ENSRNOG00000049282	ENSRNOG00000042411	ENSRNOG00000004026
ENSRNOG00000029055	ENSRNOG00000025198	ENSRNOG00000002593
ENSRNOG00000009629	ENSRNOG00000002345	ENSRNOG00000028505
ENSRNOG00000057250	ENSRNOG00000052190	ENSRNOG00000033059
ENSRNOG00000008602	ENSRNOG00000033722	ENSRNOG00000032410
ENSRNOG00000060574	ENSRNOG00000028895	ENSRNOG00000000805
ENSRNOG00000001869	ENSRNOG00000007839	ENSRNOG00000020737
ENSRNOG00000014357	ENSRNOG00000020908	ENSRNOG00000007131
ENSRNOG00000037839	ENSRNOG00000049994	ENSRNOG00000011107
ENSRNOG00000056624	ENSRNOG00000017109	ENSRNOG00000000658
ENSRNOG00000005345	ENSRNOG00000042230	ENSRNOG00000061376
ENSRNOG00000015383	ENSRNOG00000000528	ENSRNOG00000024733
ENSRNOG00000054329	ENSRNOG00000000487	ENSRNOG00000027742
ENSRNOG00000015518	ENSRNOG00000019615	ENSRNOG00000005374
ENSRNOG00000022337	ENSRNOG00000059927	ENSRNOG00000059350
ENSRNOG00000056332	ENSRNOG00000012119	ENSRNOG00000028814
ENSRNOG00000061185	ENSRNOG00000010438	ENSRNOG00000012807
ENSRNOG00000010045	ENSRNOG00000010701	ENSRNOG00000027332
ENSRNOG00000019265	ENSRNOG00000010375	ENSRNOG00000005082
ENSRNOG00000042960	ENSRNOG00000007229	ENSRNOG00000007827
ENSRNOG00000034168	ENSRNOG00000032240	ENSRNOG00000003283
ENSRNOG00000006033	ENSRNOG00000037371	ENSRNOG00000042536
ENSRNOG00000031849	ENSRNOG00000032626	ENSRNOG00000058461
ENSRNOG00000017259	ENSRNOG00000019363	ENSRNOG00000016752
ENSRNOG00000020833	ENSRNOG00000006930	ENSRNOG00000046028
ENSRNOG00000002711	ENSRNOG00000021855	ENSRNOG00000028649
ENSRNOG00000000515	ENSRNOG00000008785	ENSRNOG00000030467
ENSRNOG00000011253	ENSRNOG00000008765	ENSRNOG00000004444
ENSRNOG00000008025	ENSRNOG00000010262	ENSRNOG00000006952
ENSRNOG00000053317	ENSRNOG00000039759	ENSRNOG00000058007
ENSRNOG00000033588	ENSRNOG00000012965	ENSRNOG00000019494
ENSRNOG00000007012	ENSRNOG00000000837	ENSRNOG00000054479
ENSRNOG00000006350	ENSRNOG00000037198	ENSRNOG00000052064
ENSRNOG00000010507	ENSRNOG00000054560	ENSRNOG00000027264
ENSRNOG00000034177	ENSRNOG00000012149	ENSRNOG00000010213
ENSRNOG00000016377	ENSRNOG00000013902	ENSRNOG00000030404
ENSRNOG00000008165	ENSRNOG00000031930	ENSRNOG00000004904
ENSRNOG00000001931	ENSRNOG00000037211	ENSRNOG00000045728
ENSRNOG00000012109	ENSRNOG00000004067	ENSRNOG00000010497
ENSRNOG00000008082	ENSRNOG00000004448	ENSRNOG00000052725
ENSRNOG00000005115	ENSRNOG00000057499	ENSRNOG00000036980
ENSRNOG00000006471	ENSRNOG00000020871	ENSRNOG00000020235
ENSRNOG00000029191	ENSRNOG00000026226	ENSRNOG00000040279
ENSRNOG00000019110	ENSRNOG00000014851	ENSRNOG00000054954
ENSRNOG00000000897	ENSRNOG00000000552	ENSRNOG00000003291
ENSRNOG00000055972	ENSRNOG00000002511	ENSRNOG00000031930
ENSRNOG00000054093	ENSRNOG00000049766	ENSRNOG00000039576
ENSRNOG00000011654	ENSRNOG00000002408	ENSRNOG00000006469
ENSRNOG00000017765	ENSRNOG00000007483	ENSRNOG00000019577
ENSRNOG00000022261	ENSRNOG00000008615	ENSRNOG00000020446
ENSRNOG00000022910	ENSRNOG00000053891	ENSRNOG00000001757
ENSRNOG00000020733	ENSRNOG00000016308	ENSRNOG00000028215
ENSRNOG00000016810	ENSRNOG00000010417	ENSRNOG00000039204
ENSRNOG00000022391	ENSRNOG00000028415	ENSRNOG00000051461
ENSRNOG00000033335	ENSRNOG00000016267	ENSRNOG00000002408
ENSRNOG00000006486	ENSRNOG00000007582	ENSRNOG00000030880
ENSRNOG00000024322	ENSRNOG00000046663	ENSRNOG00000006420
ENSRNOG00000032989	ENSRNOG00000000186	ENSRNOG00000009949
ENSRNOG00000000632	ENSRNOG00000019181	ENSRNOG00000010992
ENSRNOG00000016561	ENSRNOG00000000488	ENSRNOG00000006557
ENSRNOG00000054843	ENSRNOG00000020078	ENSRNOG00000021902
ENSRNOG00000004296	ENSRNOG00000000858	ENSRNOG00000009431
ENSRNOG00000015275	ENSRNOG00000061868	ENSRNOG00000000588
ENSRNOG00000053687	ENSRNOG00000029078	ENSRNOG00000014338
ENSRNOG00000002820	ENSRNOG00000058654	ENSRNOG00000010018
ENSRNOG00000018615	ENSRNOG00000026203	ENSRNOG00000012817
ENSRNOG00000052407	ENSRNOG00000042312	ENSRNOG00000002381
ENSRNOG00000043176	ENSRNOG00000007390	ENSRNOG00000005700
ENSRNOG00000019695	ENSRNOG00000036834	ENSRNOG00000017403
ENSRNOG00000001187	ENSRNOG00000006086	ENSRNOG00000059207
ENSRNOG00000039057	ENSRNOG00000028273	ENSRNOG00000016889
ENSRNOG00000002730	ENSRNOG00000014378	ENSRNOG00000007690
ENSRNOG00000056209	ENSRNOG00000052167	ENSRNOG00000042261
ENSRNOG00000018366	ENSRNOG00000003802	ENSRNOG00000013306
ENSRNOG00000022521	ENSRNOG00000013532	ENSRNOG00000011863
ENSRNOG00000010721	ENSRNOG00000054049	ENSRNOG00000007722
ENSRNOG00000002303	ENSRNOG00000057458	ENSRNOG00000042747
ENSRNOG00000021847	ENSRNOG00000011841	ENSRNOG00000017680
ENSRNOG00000030149	ENSRNOG00000013583	ENSRNOG00000005234
ENSRNOG00000047578	ENSRNOG00000003726	ENSRNOG00000005575
ENSRNOG00000006731	ENSRNOG00000016368	ENSRNOG00000003959
ENSRNOG00000020281	ENSRNOG00000000368	ENSRNOG00000009369
ENSRNOG00000060087	ENSRNOG00000004554	ENSRNOG00000007993
ENSRNOG00000015423	ENSRNOG00000053753	ENSRNOG00000009131
ENSRNOG00000012481	ENSRNOG00000027606	ENSRNOG00000013679
ENSRNOG00000042524	ENSRNOG00000014357	ENSRNOG00000046829
ENSRNOG00000031431	ENSRNOG00000023601	ENSRNOG00000021058
ENSRNOG00000020244	ENSRNOG00000000588	ENSRNOG00000019549
ENSRNOG00000018851	ENSRNOG00000018262	ENSRNOG00000016257
ENSRNOG00000000781	ENSRNOG00000058195	ENSRNOG00000018276
ENSRNOG00000009350	ENSRNOG00000016957	ENSRNOG00000016707
ENSRNOG00000017246	ENSRNOG00000061508	ENSRNOG00000005214
ENSRNOG00000004411	ENSRNOG00000019082	ENSRNOG00000014520
ENSRNOG00000005575	ENSRNOG00000028636	ENSRNOG00000046133
ENSRNOG00000011502	ENSRNOG00000024294	ENSRNOG00000047741
ENSRNOG00000049277	ENSRNOG00000003806	ENSRNOG00000022523
ENSRNOG00000058993	ENSRNOG00000050478	ENSRNOG00000001908
ENSRNOG00000046864	ENSRNOG00000009761	ENSRNOG00000008736
ENSRNOG00000018297	ENSRNOG00000031934	ENSRNOG00000009348
ENSRNOG00000018113	ENSRNOG00000016163	ENSRNOG00000017002
ENSRNOG00000021553	ENSRNOG00000026941	ENSRNOG00000001216
ENSRNOG00000020593	ENSRNOG00000016326	ENSRNOG00000055583
ENSRNOG00000020573	ENSRNOG00000017676	ENSRNOG00000020284
ENSRNOG00000023304	ENSRNOG00000052188	ENSRNOG00000002428
ENSRNOG00000000036	ENSRNOG00000052979	ENSRNOG00000050996
ENSRNOG00000019100	ENSRNOG00000033719	ENSRNOG00000031136
ENSRNOG00000010695	ENSRNOG00000054515	ENSRNOG00000020726
ENSRNOG00000059097	ENSRNOG00000015383	ENSRNOG00000001187
ENSRNOG00000028767	ENSRNOG00000008412	ENSRNOG00000000488
ENSRNOG00000021916	ENSRNOG00000045764	ENSRNOG00000011000
ENSRNOG00000000855	ENSRNOG00000011145	ENSRNOG00000046834
ENSRNOG00000024650	ENSRNOG00000019744	ENSRNOG00000013445
ENSRNOG00000055001	ENSRNOG00000010794	ENSRNOG00000026306
ENSRNOG00000026518	ENSRNOG00000042978	ENSRNOG00000027234
ENSRNOG00000008133	ENSRNOG00000000378	ENSRNOG00000010534
ENSRNOG00000020908	ENSRNOG00000014556	ENSRNOG00000012946
ENSRNOG00000002540	ENSRNOG00000005506	ENSRNOG00000001869
ENSRNOG00000012090	ENSRNOG00000019504	ENSRNOG00000051619
ENSRNOG00000003098	ENSRNOG00000001830	ENSRNOG00000009290
ENSRNOG00000009503	ENSRNOG00000042137	ENSRNOG00000022999
ENSRNOG00000004180	ENSRNOG00000002139	ENSRNOG00000025126
ENSRNOG00000026791	ENSRNOG00000000137	ENSRNOG00000049270
ENSRNOG00000046607	ENSRNOG00000010805	ENSRNOG00000015078
ENSRNOG00000002501	ENSRNOG00000059660	ENSRNOG00000055512
ENSRNOG00000011984	ENSRNOG00000004882	ENSRNOG00000026644
ENSRNOG00000017156	ENSRNOG00000015615	ENSRNOG00000000855
ENSRNOG00000030101	ENSRNOG00000020431	ENSRNOG00000001766
ENSRNOG00000053260	ENSRNOG00000052634	ENSRNOG00000019572
ENSRNOG00000005369	ENSRNOG00000005780	ENSRNOG00000005074
ENSRNOG00000058539	ENSRNOG00000043419	ENSRNOG00000009445
ENSRNOG00000057025	ENSRNOG00000061160	ENSRNOG00000017724
ENSRNOG00000004488	ENSRNOG00000017002	ENSRNOG00000016150
ENSRNOG00000048148	ENSRNOG00000017237	ENSRNOG00000008015
ENSRNOG00000047776	ENSRNOG00000058375	ENSRNOG00000059625
ENSRNOG00000000251	ENSRNOG00000016595	ENSRNOG00000020440
ENSRNOG00000000634	ENSRNOG00000003494	ENSRNOG00000028856
ENSRNOG00000002548	ENSRNOG00000015232	ENSRNOG00000031058
ENSRNOG00000017783	ENSRNOG00000023548	ENSRNOG00000013791
ENSRNOG00000054474	ENSRNOG00000021200	ENSRNOG00000059765
ENSRNOG00000003741	ENSRNOG00000026344	ENSRNOG00000015225
ENSRNOG00000047459	ENSRNOG00000039593	ENSRNOG00000010760
ENSRNOG00000023093	ENSRNOG00000034177	ENSRNOG00000021776
ENSRNOG00000005776	ENSRNOG00000018247	ENSRNOG00000059500
ENSRNOG00000019615	ENSRNOG00000017250	ENSRNOG00000058446
ENSRNOG00000019659	ENSRNOG00000019854	ENSRNOG00000002134
ENSRNOG00000012174	ENSRNOG00000013380	ENSRNOG00000003259
ENSRNOG00000002930	ENSRNOG00000019019	ENSRNOG00000014722
ENSRNOG00000014503	ENSRNOG00000028668	ENSRNOG00000058470
ENSRNOG00000048231	ENSRNOG00000042524	ENSRNOG00000014835
ENSRNOG00000008834	ENSRNOG00000011533	ENSRNOG00000020991
ENSRNOG00000047327	ENSRNOG00000003544	ENSRNOG00000003596
ENSRNOG00000010870	ENSRNOG00000055650	ENSRNOG00000000165
ENSRNOG00000014080	ENSRNOG00000009468	ENSRNOG00000003296
ENSRNOG00000057092	ENSRNOG00000002470	ENSRNOG00000007951
ENSRNOG00000038572	ENSRNOG00000015774	ENSRNOG00000022343
ENSRNOG00000024428	ENSRNOG00000009370	ENSRNOG00000042460
ENSRNOG00000017525	ENSRNOG00000007999	ENSRNOG00000034241
ENSRNOG00000057221	ENSRNOG00000046858	ENSRNOG00000007142
ENSRNOG00000004117	ENSRNOG00000004158	ENSRNOG00000005504
ENSRNOG00000026143	ENSRNOG00000046007	ENSRNOG00000009275
ENSRNOG00000012027	ENSRNOG00000009907	ENSRNOG00000006940
ENSRNOG00000060703	ENSRNOG00000026679	ENSRNOG00000045560
ENSRNOG00000003726	ENSRNOG00000006956	ENSRNOG00000009790
ENSRNOG00000003785	ENSRNOG00000026310	ENSRNOG00000012505
ENSRNOG00000000566	ENSRNOG00000015691	ENSRNOG00000016208
ENSRNOG00000015148	ENSRNOG00000021916	ENSRNOG00000016763
ENSRNOG00000014130	ENSRNOG00000018028	ENSRNOG00000012874
ENSRNOG00000024178	ENSRNOG00000020084	ENSRNOG00000018729
ENSRNOG00000037167	ENSRNOG00000006170	ENSRNOG00000003563
ENSRNOG00000014010	ENSRNOG00000016412	ENSRNOG00000054901
ENSRNOG00000025302	ENSRNOG00000061359	ENSRNOG00000001449
ENSRNOG00000008257	ENSRNOG00000046434	ENSRNOG00000007839
ENSRNOG00000005038	ENSRNOG00000006320	ENSRNOG00000016273
ENSRNOG00000056550	ENSRNOG00000021669	ENSRNOG00000020188
ENSRNOG00000007372	ENSRNOG00000027839	ENSRNOG00000026653
ENSRNOG00000015131	ENSRNOG00000020733	ENSRNOG00000050968
ENSRNOG00000016740	ENSRNOG00000006030	ENSRNOG00000000777
ENSRNOG00000043031	ENSRNOG00000056589	ENSRNOG00000020310
ENSRNOG00000013177	ENSRNOG00000007012	ENSRNOG00000016496
ENSRNOG00000020873	ENSRNOG00000000805	ENSRNOG00000052167
ENSRNOG00000027035	ENSRNOG00000057696	ENSRNOG00000015075
ENSRNOG00000004197	ENSRNOG00000047864	ENSRNOG00000006076
ENSRNOG00000004575	ENSRNOG00000020310	ENSRNOG00000029500
ENSRNOG00000043180	ENSRNOG00000019440	ENSRNOG00000057867
ENSRNOG00000020009	ENSRNOG00000010997	ENSRNOG00000039969
ENSRNOG00000031398	ENSRNOG00000015105	ENSRNOG00000050478
ENSRNOG00000006579	ENSRNOG00000025332	ENSRNOG00000026647
ENSRNOG00000033338	ENSRNOG00000054340	ENSRNOG00000007679
ENSRNOG00000026861	ENSRNOG00000026116	ENSRNOG00000004841
ENSRNOG00000012122	ENSRNOG00000020873	ENSRNOG00000053163
ENSRNOG00000016275	ENSRNOG00000002381	ENSRNOG00000006689
ENSRNOG00000020169	ENSRNOG00000007461	ENSRNOG00000017980
ENSRNOG00000025130	ENSRNOG00000025051	ENSRNOG00000024689
ENSRNOG00000052772	ENSRNOG00000016717	ENSRNOG00000000569
ENSRNOG00000059314	ENSRNOG00000004197	ENSRNOG00000058003
ENSRNOG00000059900	ENSRNOG00000014513	ENSRNOG00000018564
ENSRNOG00000001628	ENSRNOG00000000456	ENSRNOG00000013309
ENSRNOG00000010597	ENSRNOG00000000860	ENSRNOG00000007764
ENSRNOG00000036827	ENSRNOG00000045733	ENSRNOG00000051235
ENSRNOG00000013774	ENSRNOG00000013128	ENSRNOG00000007984
ENSRNOG00000019780	ENSRNOG00000027024	ENSRNOG00000057189
ENSRNOG00000014104	ENSRNOG00000012215	ENSRNOG00000022597
ENSRNOG00000013282	ENSRNOG00000000036	ENSRNOG00000060262
ENSRNOG00000016326	ENSRNOG00000020244	ENSRNOG00000050509
ENSRNOG00000011777	ENSRNOG00000002487	ENSRNOG00000022598
ENSRNOG00000060356	ENSRNOG00000031004	ENSRNOG00000010111
ENSRNOG00000054495	ENSRNOG00000042960	ENSRNOG00000027006
ENSRNOG00000054539	ENSRNOG00000016643	ENSRNOG00000049942
ENSRNOG00000019208	ENSRNOG00000011907	ENSRNOG00000050482
ENSRNOG00000051325	ENSRNOG00000024322	ENSRNOG00000056457
ENSRNOG00000038035	ENSRNOG00000013707	ENSRNOG00000017854
ENSRNOG00000008847	ENSRNOG00000024640	ENSRNOG00000059956
ENSRNOG00000021097	ENSRNOG00000061358	ENSRNOG00000007489
ENSRNOG00000009339	ENSRNOG00000002460	ENSRNOG00000034177
ENSRNOG00000045924	ENSRNOG00000012521	ENSRNOG00000028043
ENSRNOG00000046309	ENSRNOG00000012302	ENSRNOG00000016849
ENSRNOG00000013820	ENSRNOG00000057867	ENSRNOG00000008270
ENSRNOG00000000853	ENSRNOG00000030012	ENSRNOG00000007118
ENSRNOG00000024420	ENSRNOG00000046216	ENSRNOG00000019365
ENSRNOG00000018494	ENSRNOG00000040201	ENSRNOG00000017149
ENSRNOG00000000129	ENSRNOG00000056746	ENSRNOG00000015382
ENSRNOG00000046195	ENSRNOG00000016037	ENSRNOG00000059097
ENSRNOG00000017766	ENSRNOG00000002843	ENSRNOG00000053384
ENSRNOG00000010553	ENSRNOG00000003603	ENSRNOG00000049994
ENSRNOG00000053005	ENSRNOG00000049192	ENSRNOG00000017063
ENSRNOG00000050672	ENSRNOG00000030726	ENSRNOG00000024264
ENSRNOG00000061869	ENSRNOG00000004311	ENSRNOG00000029212
ENSRNOG00000049918	ENSRNOG00000017783	ENSRNOG00000055721
ENSRNOG00000022893	ENSRNOG00000045999	ENSRNOG00000009848
ENSRNOG00000015027	ENSRNOG00000020573	ENSRNOG00000020793
ENSRNOG00000001544	ENSRNOG00000037167	ENSRNOG00000051948
ENSRNOG00000010278	ENSRNOG00000016632	ENSRNOG00000004150
ENSRNOG00000042929	ENSRNOG00000025670	ENSRNOG00000061147
ENSRNOG00000059984	ENSRNOG00000020136	ENSRNOG00000014786
ENSRNOG00000004717	ENSRNOG00000042747	ENSRNOG00000018602
ENSRNOG00000004498	ENSRNOG00000053402	ENSRNOG00000053387
ENSRNOG00000008915	ENSRNOG00000061530	ENSRNOG00000042970
ENSRNOG00000003675	ENSRNOG00000055156	ENSRNOG00000007864
ENSRNOG00000011406	ENSRNOG00000020685	ENSRNOG00000004679
ENSRNOG00000013727	ENSRNOG00000004117	ENSRNOG00000052407
ENSRNOG00000019704	ENSRNOG00000039207	ENSRNOG00000012151
ENSRNOG00000006198	ENSRNOG00000021856	ENSRNOG00000010852
ENSRNOG00000021713	ENSRNOG00000034290	ENSRNOG00000030374
ENSRNOG00000048878	ENSRNOG00000009514	ENSRNOG00000020129
ENSRNOG00000046050	ENSRNOG00000031136	ENSRNOG00000019363
ENSRNOG00000015921	ENSRNOG00000051253	ENSRNOG00000019737
ENSRNOG00000055716	ENSRNOG00000012972	ENSRNOG00000016684
ENSRNOG00000000956	ENSRNOG00000016070	ENSRNOG00000017311
ENSRNOG00000007600	ENSRNOG00000058645	ENSRNOG00000033256
ENSRNOG00000057458	ENSRNOG00000015562	ENSRNOG00000009370
ENSRNOG00000010253	ENSRNOG00000002322	ENSRNOG00000023548
ENSRNOG00000022321	ENSRNOG00000042070	ENSRNOG00000020782
ENSRNOG00000023566	ENSRNOG00000011406	ENSRNOG00000013267
ENSRNOG00000007049	ENSRNOG00000012176	ENSRNOG00000003748
ENSRNOG00000059906	ENSRNOG00000007590	ENSRNOG00000016294
ENSRNOG00000026702	ENSRNOG00000000907	ENSRNOG00000021855
ENSRNOG00000020552	ENSRNOG00000006365	ENSRNOG00000001456
ENSRNOG00000007539	ENSRNOG00000023303	ENSRNOG00000030712
ENSRNOG00000015794	ENSRNOG00000056826	ENSRNOG00000021255
ENSRNOG00000027808	ENSRNOG00000032328	ENSRNOG00000002470
ENSRNOG00000010359	ENSRNOG00000018494	ENSRNOG00000001265
ENSRNOG00000006321	ENSRNOG00000047363	ENSRNOG00000042838
ENSRNOG00000048706	ENSRNOG00000004676	ENSRNOG00000004889
ENSRNOG00000004921	ENSRNOG00000004155	ENSRNOG00000051216
ENSRNOG00000010535	ENSRNOG00000013364	ENSRNOG00000013798
ENSRNOG00000042944	ENSRNOG00000007129	ENSRNOG00000045811
ENSRNOG00000049642	ENSRNOG00000056624	ENSRNOG00000007041
ENSRNOG00000011330	ENSRNOG00000020849	ENSRNOG00000008733
ENSRNOG00000018355	ENSRNOG00000014282	ENSRNOG00000016575
ENSRNOG00000047876	ENSRNOG00000037134	ENSRNOG00000056297
ENSRNOG00000011688	ENSRNOG00000057578	ENSRNOG00000001194
ENSRNOG00000013042	ENSRNOG00000023861	ENSRNOG00000051163
ENSRNOG00000050478	ENSRNOG00000013147	ENSRNOG00000005818
ENSRNOG00000015308	ENSRNOG00000000459	ENSRNOG00000004197
ENSRNOG00000055450	ENSRNOG00000020058	ENSRNOG00000033744
ENSRNOG00000016525	ENSRNOG00000036677	ENSRNOG00000016581
ENSRNOG00000038432	ENSRNOG00000008890	ENSRNOG00000021903
ENSRNOG00000059894	ENSRNOG00000005392	ENSRNOG00000047035
ENSRNOG00000012906	ENSRNOG00000004078	ENSRNOG00000056011
ENSRNOG00000015690	ENSRNOG00000030149	ENSRNOG00000000613
ENSRNOG00000003388	ENSRNOG00000016716	ENSRNOG00000029078
ENSRNOG00000056069	ENSRNOG00000043416	ENSRNOG00000006204
ENSRNOG00000052732	ENSRNOG00000002659	ENSRNOG00000024661
ENSRNOG00000004216	ENSRNOG00000013237	ENSRNOG00000008022
ENSRNOG00000037134	ENSRNOG00000009197	ENSRNOG00000009590
ENSRNOG00000055097	ENSRNOG00000053811	ENSRNOG00000004700
ENSRNOG00000059926	ENSRNOG00000034139	ENSRNOG00000021669
ENSRNOG00000057443	ENSRNOG00000061544	ENSRNOG00000000082
ENSRNOG00000005781	ENSRNOG00000023633	ENSRNOG00000018247
ENSRNOG00000049271	ENSRNOG00000010513	ENSRNOG00000025371
ENSRNOG00000013262	ENSRNOG00000028077	ENSRNOG00000010262
ENSRNOG00000060348	ENSRNOG00000021752	ENSRNOG00000001425
ENSRNOG00000057852	ENSRNOG00000037632	ENSRNOG00000011096
ENSRNOG00000001422	ENSRNOG00000003683	ENSRNOG00000010797
ENSRNOG00000028415	ENSRNOG00000022337	ENSRNOG00000007030
ENSRNOG00000055527	ENSRNOG00000006963	ENSRNOG00000004262
ENSRNOG00000010610	ENSRNOG00000000956	ENSRNOG00000032002
ENSRNOG00000049392	ENSRNOG00000012216	ENSRNOG00000023162
ENSRNOG00000004649	ENSRNOG00000026902	ENSRNOG00000002372
ENSRNOG00000054340	ENSRNOG00000054438	ENSRNOG00000006103
ENSRNOG00000009955	ENSRNOG00000004889	ENSRNOG00000058908
ENSRNOG00000036910	ENSRNOG00000037435	ENSRNOG00000054964
ENSRNOG00000014816	ENSRNOG00000016085	ENSRNOG00000012109
ENSRNOG00000016505	ENSRNOG00000020836	ENSRNOG00000021468
ENSRNOG00000024636	ENSRNOG00000004873	ENSRNOG00000008415
ENSRNOG00000018853	ENSRNOG00000048907	ENSRNOG00000023943
ENSRNOG00000023633	ENSRNOG00000022953	ENSRNOG00000008930
ENSRNOG00000010263	ENSRNOG00000039656	ENSRNOG00000059059
ENSRNOG00000020970	ENSRNOG00000045560	ENSRNOG00000007726
ENSRNOG00000023340	ENSRNOG00000008847	ENSRNOG00000000940
ENSRNOG00000009738	ENSRNOG00000001858	ENSRNOG00000016366
ENSRNOG00000015529	ENSRNOG00000009565	ENSRNOG00000008400
ENSRNOG00000045644	ENSRNOG00000004870	ENSRNOG00000049560
ENSRNOG00000000443	ENSRNOG00000003284	ENSRNOG00000015717
ENSRNOG00000022839	ENSRNOG00000032596	ENSRNOG00000022720
ENSRNOG00000047363	ENSRNOG00000000963	ENSRNOG00000019609
ENSRNOG00000052594	ENSRNOG00000055512	ENSRNOG00000006551
ENSRNOG00000045646	ENSRNOG00000013623	ENSRNOG00000042741
ENSRNOG00000058568	ENSRNOG00000024923	ENSRNOG00000033940
ENSRNOG00000027894	ENSRNOG00000057221	ENSRNOG00000020953
ENSRNOG00000004479	ENSRNOG00000023549	ENSRNOG00000019744
ENSRNOG00000012208	ENSRNOG00000058111	ENSRNOG00000019041
ENSRNOG00000013269	ENSRNOG00000008575	ENSRNOG00000028196
ENSRNOG00000060475	ENSRNOG00000049355	ENSRNOG00000016632
ENSRNOG00000033653	ENSRNOG00000010919	ENSRNOG00000004772
ENSRNOG00000050432	ENSRNOG00000015117	ENSRNOG00000022637
ENSRNOG00000059476	ENSRNOG00000012222	ENSRNOG00000042771
ENSRNOG00000000963	ENSRNOG00000051221	ENSRNOG00000023400
ENSRNOG00000013057	ENSRNOG00000020173	ENSRNOG00000001259
ENSRNOG00000048703	ENSRNOG00000004150	ENSRNOG00000042411
ENSRNOG00000021555	ENSRNOG00000004720	ENSRNOG00000028895
ENSRNOG00000058795	ENSRNOG00000007539	ENSRNOG00000009001
ENSRNOG00000042229	ENSRNOG00000010450	ENSRNOG00000013231
ENSRNOG00000053529	ENSRNOG00000019718	ENSRNOG00000013239
ENSRNOG00000014164	ENSRNOG00000052486	ENSRNOG00000004500
ENSRNOG00000002336	ENSRNOG00000019695	ENSRNOG00000015491
ENSRNOG00000036681	ENSRNOG00000008759	ENSRNOG00000009690
ENSRNOG00000038291	ENSRNOG00000014231	ENSRNOG00000054033
ENSRNOG00000016558	ENSRNOG00000008025	ENSRNOG00000010921
ENSRNOG00000008890	ENSRNOG00000005700	ENSRNOG00000006116
ENSRNOG00000012827	ENSRNOG00000018839	ENSRNOG00000051193
ENSRNOG00000018815	ENSRNOG00000002372	ENSRNOG00000051958
ENSRNOG00000002599	ENSRNOG00000016872	ENSRNOG00000000811
ENSRNOG00000007335	ENSRNOG00000000634	ENSRNOG00000015071
ENSRNOG00000060103	ENSRNOG00000016420	ENSRNOG00000013717
ENSRNOG00000028895	ENSRNOG00000014156	ENSRNOG00000012325
ENSRNOG00000014282	ENSRNOG00000005776	ENSRNOG00000007514
ENSRNOG00000045797	ENSRNOG00000000471	ENSRNOG00000049215
ENSRNOG00000038744	ENSRNOG00000008086	ENSRNOG00000010922
ENSRNOG00000001167	ENSRNOG00000007033	ENSRNOG00000003442
ENSRNOG00000002429	ENSRNOG00000043445	ENSRNOG00000006641
ENSRNOG00000018899	ENSRNOG00000014227	ENSRNOG00000015274
ENSRNOG00000036659	ENSRNOG00000014505	ENSRNOG00000002610
ENSRNOG00000025522	ENSRNOG00000009590	ENSRNOG00000051002
ENSRNOG00000032941	ENSRNOG00000047102	ENSRNOG00000013318
ENSRNOG00000015105	ENSRNOG00000045753	ENSRNOG00000000034
ENSRNOG00000012835	ENSRNOG00000009629	ENSRNOG00000049075
ENSRNOG00000056947	ENSRNOG00000048881	ENSRNOG00000007178
ENSRNOG00000042332	ENSRNOG00000046683	ENSRNOG00000008005
ENSRNOG00000000368	ENSRNOG00000013967	ENSRNOG00000016525
ENSRNOG00000005850	ENSRNOG00000037839	ENSRNOG00000050090
ENSRNOG00000023485	ENSRNOG00000032832	ENSRNOG00000053753
ENSRNOG00000007178	ENSRNOG00000057347	ENSRNOG00000009360
ENSRNOG00000053449	ENSRNOG00000002540	ENSRNOG00000039754
ENSRNOG00000024115	ENSRNOG00000019128	ENSRNOG00000015383
ENSRNOG00000028041	ENSRNOG00000059949	ENSRNOG00000055391
ENSRNOG00000055672	ENSRNOG00000033844	ENSRNOG00000033017
ENSRNOG00000021381	ENSRNOG00000017409	ENSRNOG00000007567
ENSRNOG00000008134	ENSRNOG00000006767	ENSRNOG00000016112
ENSRNOG00000033844	ENSRNOG00000009539	ENSRNOG00000001288
ENSRNOG00000037982	ENSRNOG00000017773	ENSRNOG00000008513
ENSRNOG00000016782	ENSRNOG00000023683	ENSRNOG00000018350
ENSRNOG00000004537	ENSRNOG00000026594	ENSRNOG00000028743
ENSRNOG00000015306	ENSRNOG00000021130	ENSRNOG00000046050
ENSRNOG00000019985	ENSRNOG00000016041	ENSRNOG00000011293
ENSRNOG00000052640	ENSRNOG00000013937	ENSRNOG00000017887
ENSRNOG00000024425	ENSRNOG00000013586	ENSRNOG00000021579
ENSRNOG00000009565	ENSRNOG00000023566	ENSRNOG00000020505
ENSRNOG00000025670	ENSRNOG00000059698	ENSRNOG00000004870
ENSRNOG00000016403	ENSRNOG00000038328	ENSRNOG00000000528
ENSRNOG00000046144	ENSRNOG00000007178	ENSRNOG00000003979
ENSRNOG00000020151	ENSRNOG00000054296	ENSRNOG00000003144
ENSRNOG00000052979	ENSRNOG00000037982	ENSRNOG00000005905
ENSRNOG00000009298	ENSRNOG00000056184	ENSRNOG00000055020
ENSRNOG00000021402	ENSRNOG00000007335	ENSRNOG00000046599
ENSRNOG00000046258	ENSRNOG00000022893	ENSRNOG00000029698
ENSRNOG00000024457	ENSRNOG00000018163	ENSRNOG00000003745
ENSRNOG00000045771	ENSRNOG00000010883	ENSRNOG00000023786
ENSRNOG00000050173	ENSRNOG00000011078	ENSRNOG00000014673
ENSRNOG00000007014	ENSRNOG00000018952	ENSRNOG00000039571
ENSRNOG00000055553	ENSRNOG00000017918	ENSRNOG00000004226
ENSRNOG00000002723	ENSRNOG00000004725	ENSRNOG00000005388
ENSRNOG00000002728	ENSRNOG00000028733	ENSRNOG00000017319
ENSRNOG00000011841	ENSRNOG00000033736	ENSRNOG00000019440
ENSRNOG00000052688	ENSRNOG00000049614	ENSRNOG00000061394
ENSRNOG00000006314	ENSRNOG00000021402	ENSRNOG00000022337
ENSRNOG00000039568	ENSRNOG00000024190	ENSRNOG00000004414
ENSRNOG00000046139	ENSRNOG00000029386	ENSRNOG00000058186
ENSRNOG00000058193	ENSRNOG00000005369	ENSRNOG00000018477
ENSRNOG00000051464	ENSRNOG00000009425	ENSRNOG00000005227
ENSRNOG00000012995	ENSRNOG00000015082	ENSRNOG00000022419
	ENSRNOG00000007270	ENSRNOG00000043201
	ENSRNOG00000008133	ENSRNOG00000012980
	ENSRNOG00000011568	ENSRNOG00000001007
	ENSRNOG00000049425	ENSRNOG00000028641
	ENSRNOG00000031851	ENSRNOG00000007657
	ENSRNOG00000060438	ENSRNOG00000025167
	ENSRNOG00000016980	ENSRNOG00000019328
	ENSRNOG00000061199	ENSRNOG00000047746
	ENSRNOG00000017525	ENSRNOG00000003806
	ENSRNOG00000008134	ENSRNOG00000003866
	ENSRNOG00000048919	ENSRNOG00000007036
	ENSRNOG00000008915	ENSRNOG00000006167
	ENSRNOG00000021256	ENSRNOG00000013747
	ENSRNOG00000000439	ENSRNOG00000058654
	ENSRNOG00000031398	ENSRNOG00000046683
	ENSRNOG00000028357	ENSRNOG00000007076
	ENSRNOG00000020077	ENSRNOG00000025143
	ENSRNOG00000049277	ENSRNOG00000014538
	ENSRNOG00000006471	ENSRNOG00000005565
	ENSRNOG00000037148	ENSRNOG00000009471
	ENSRNOG00000045646	ENSRNOG00000018524
	ENSRNOG00000010205	ENSRNOG00000012343
	ENSRNOG00000013745	ENSRNOG00000001302
	ENSRNOG00000005009	ENSRNOG00000019308
	ENSRNOG00000053687	ENSRNOG00000043182
	ENSRNOG00000010610	ENSRNOG00000039593
	ENSRNOG00000021553	ENSRNOG00000047605
	ENSRNOG00000012622	ENSRNOG00000057384
	ENSRNOG00000013674	ENSRNOG00000008666
	ENSRNOG00000017882	ENSRNOG00000002014
	ENSRNOG00000059956	ENSRNOG00000038835
	ENSRNOG00000008065	ENSRNOG00000033564
	ENSRNOG00000052514	ENSRNOG00000027357
	ENSRNOG00000061630	ENSRNOG00000005271
	ENSRNOG00000003452	ENSRNOG00000024625
	ENSRNOG00000039464	ENSRNOG00000038868
	ENSRNOG00000004678	ENSRNOG00000047393
	ENSRNOG00000020860	ENSRNOG00000037509
	ENSRNOG00000055773	ENSRNOG00000046333
	ENSRNOG00000013554	ENSRNOG00000012141
	ENSRNOG00000023122	ENSRNOG00000019716
	ENSRNOG00000027099	ENSRNOG00000004100
	ENSRNOG00000051285	ENSRNOG00000010027
	ENSRNOG00000042182	ENSRNOG00000002950
	ENSRNOG00000009705	ENSRNOG00000034130
	ENSRNOG00000046981	ENSRNOG00000048397
	ENSRNOG00000007636	ENSRNOG00000027286
	ENSRNOG00000019577	ENSRNOG00000047854
	ENSRNOG00000047776	ENSRNOG00000057945
	ENSRNOG00000004731	ENSRNOG00000010438
	ENSRNOG00000013954	ENSRNOG00000021220
	ENSRNOG00000018485	ENSRNOG00000007393
	ENSRNOG00000020797	ENSRNOG00000000728
	ENSRNOG00000036681	ENSRNOG00000001245
	ENSRNOG00000013654	ENSRNOG00000015616
	ENSRNOG00000057855	ENSRNOG00000010468
	ENSRNOG00000019958	ENSRNOG00000033809
	ENSRNOG00000011253	ENSRNOG00000047714
	ENSRNOG00000014034	ENSRNOG00000020300
	ENSRNOG00000015297	ENSRNOG00000019195
	ENSRNOG00000004411	ENSRNOG00000025970
	ENSRNOG00000020952	ENSRNOG00000061379
	ENSRNOG00000033588	ENSRNOG00000057347
	ENSRNOG00000029756	ENSRNOG00000003947
	ENSRNOG00000008203	ENSRNOG00000043445
	ENSRNOG00000026944	ENSRNOG00000006767
	ENSRNOG00000001367	ENSRNOG00000057729
	ENSRNOG00000043031	ENSRNOG00000008170
	ENSRNOG00000046144	ENSRNOG00000009079
	ENSRNOG00000008588	ENSRNOG00000010763
	ENSRNOG00000013820	ENSRNOG00000050210
	ENSRNOG00000002142	ENSRNOG00000017897
	ENSRNOG00000027767	ENSRNOG00000045998
	ENSRNOG00000007606	ENSRNOG00000004482
	ENSRNOG00000056332	ENSRNOG00000004843
	ENSRNOG00000049740	ENSRNOG00000058087
	ENSRNOG00000005215	ENSRNOG00000004033
	ENSRNOG00000029423	ENSRNOG00000054548
	ENSRNOG00000014124	ENSRNOG00000010378
	ENSRNOG00000001528	ENSRNOG00000009211
	ENSRNOG00000024346	ENSRNOG00000051372
	ENSRNOG00000022256	ENSRNOG00000045771
	ENSRNOG00000010480	ENSRNOG00000046663
	ENSRNOG00000009870	ENSRNOG00000014964
	ENSRNOG00000033653	ENSRNOG00000023463
	ENSRNOG00000006759	ENSRNOG00000031706
	ENSRNOG00000019477	ENSRNOG00000003251
	ENSRNOG00000002863	ENSRNOG00000018378
	ENSRNOG00000023318	ENSRNOG00000021474
	ENSRNOG00000004296	ENSRNOG00000057688
	ENSRNOG00000006486	ENSRNOG00000015063
	ENSRNOG00000015674	ENSRNOG00000033921
	ENSRNOG00000011973	ENSRNOG00000018408
	ENSRNOG00000011305	ENSRNOG00000017753
	ENSRNOG00000048874	ENSRNOG00000005450
	ENSRNOG00000025502	ENSRNOG00000003088
	ENSRNOG00000022845	ENSRNOG00000038746
	ENSRNOG00000002592	ENSRNOG00000010658
	ENSRNOG00000016782	ENSRNOG00000004554
	ENSRNOG00000047466	ENSRNOG00000007989
	ENSRNOG00000045913	ENSRNOG00000018517
	ENSRNOG00000011171	ENSRNOG00000001912
	ENSRNOG00000016358	ENSRNOG00000020468
	ENSRNOG00000049392	ENSRNOG00000042753
	ENSRNOG00000002303	ENSRNOG00000050946
	ENSRNOG00000003992	ENSRNOG00000007590
	ENSRNOG00000037082	ENSRNOG00000010045
	ENSRNOG00000055689	ENSRNOG00000028586
	ENSRNOG00000039110	ENSRNOG00000014987
	ENSRNOG00000048169	ENSRNOG00000043176
	ENSRNOG00000001926	ENSRNOG00000015774
	ENSRNOG00000036910	ENSRNOG00000011032
	ENSRNOG00000054603	ENSRNOG00000058993
	ENSRNOG00000060130	ENSRNOG00000000692
	ENSRNOG00000002792	ENSRNOG00000004489
	ENSRNOG00000013330	ENSRNOG00000025075
	ENSRNOG00000000412	ENSRNOG00000010994
	ENSRNOG00000037137	ENSRNOG00000012140
	ENSRNOG00000046607	ENSRNOG00000000017
	ENSRNOG00000003189	ENSRNOG00000008099
	ENSRNOG00000013324	ENSRNOG00000007713
	ENSRNOG00000003279	ENSRNOG00000008765
	ENSRNOG00000046949	ENSRNOG00000049361
	ENSRNOG00000009556	ENSRNOG00000005309
	ENSRNOG00000023209	ENSRNOG00000047367
	ENSRNOG00000029668	ENSRNOG00000018603
	ENSRNOG00000018853	ENSRNOG00000048140
	ENSRNOG00000031598	ENSRNOG00000011696
	ENSRNOG00000021724	ENSRNOG00000031045
	ENSRNOG00000006611	ENSRNOG00000007012
	ENSRNOG00000056575	ENSRNOG00000011406
	ENSRNOG00000060391	ENSRNOG00000020274
	ENSRNOG00000059784	ENSRNOG00000005960
	ENSRNOG00000007970	ENSRNOG00000010325
	ENSRNOG00000012061	ENSRNOG00000023334
	ENSRNOG00000010259	ENSRNOG00000009401
	ENSRNOG00000005345	ENSRNOG00000009730
	ENSRNOG00000007545	ENSRNOG00000052296
	ENSRNOG00000028767	ENSRNOG00000053869
	ENSRNOG00000033490	ENSRNOG00000055156
	ENSRNOG00000002336	ENSRNOG00000030174
	ENSRNOG00000031974	ENSRNOG00000039627
	ENSRNOG00000054093	ENSRNOG00000031090
	ENSRNOG00000048039	ENSRNOG00000026518
	ENSRNOG00000003336	ENSRNOG00000005888
	ENSRNOG00000014761	ENSRNOG00000018454
	ENSRNOG00000002092	ENSRNOG00000033397
	ENSRNOG00000025069	ENSRNOG00000024545
	ENSRNOG00000020247	ENSRNOG00000003669
	ENSRNOG00000022640	ENSRNOG00000040300
	ENSRNOG00000029841	ENSRNOG00000015416
	ENSRNOG00000059757	ENSRNOG00000022256
	ENSRNOG00000013535	ENSRNOG00000058195
	ENSRNOG00000057082	ENSRNOG00000020203
	ENSRNOG00000053303	ENSRNOG00000027736
	ENSRNOG00000020835	ENSRNOG00000004273
	ENSRNOG00000057443	ENSRNOG00000003134
	ENSRNOG00000042929	ENSRNOG00000021053
	ENSRNOG00000018735	ENSRNOG00000005951
	ENSRNOG00000016245	ENSRNOG00000012262
	ENSRNOG00000060574	ENSRNOG00000017690
	ENSRNOG00000002728	ENSRNOG00000013872
	ENSRNOG00000019659	ENSRNOG00000000151
	ENSRNOG00000018915	ENSRNOG00000008187
	ENSRNOG00000048161	ENSRNOG00000018346
	ENSRNOG00000002800	ENSRNOG00000009047
	ENSRNOG00000027942	ENSRNOG00000013674
	ENSRNOG00000001931	ENSRNOG00000019270
	ENSRNOG00000037446	ENSRNOG00000000860
	ENSRNOG00000053449	ENSRNOG00000021787
	ENSRNOG00000014503	ENSRNOG00000011078
	ENSRNOG00000006583	ENSRNOG00000021438
	ENSRNOG00000001962	ENSRNOG00000016543
	ENSRNOG00000060103	ENSRNOG00000017503
	ENSRNOG00000008602	ENSRNOG00000018858
	ENSRNOG00000042771	ENSRNOG00000014530
	ENSRNOG00000002046	ENSRNOG00000030689
	ENSRNOG00000005309	ENSRNOG00000026050
	ENSRNOG00000012495	ENSRNOG00000008133
	ENSRNOG00000057404	ENSRNOG00000027880
	ENSRNOG00000000840	ENSRNOG00000031113
	ENSRNOG00000013318	ENSRNOG00000022260
	ENSRNOG00000021478	ENSRNOG00000004483
	ENSRNOG00000012481	ENSRNOG00000017021
	ENSRNOG00000001525	ENSRNOG00000053260
	ENSRNOG00000057389	ENSRNOG00000027468
	ENSRNOG00000046048	ENSRNOG00000020097
	ENSRNOG00000057250	ENSRNOG00000007027
	ENSRNOG00000016535	ENSRNOG00000016748
	ENSRNOG00000002191	ENSRNOG00000042137
	ENSRNOG00000008257	ENSRNOG00000002730
	ENSRNOG00000022391	ENSRNOG00000004110
	ENSRNOG00000012122	ENSRNOG00000010513
	ENSRNOG00000052772	ENSRNOG00000004011
	ENSRNOG00000054465	ENSRNOG00000060087
	ENSRNOG00000059314	ENSRNOG00000028640
	ENSRNOG00000025805	ENSRNOG00000021918
	ENSRNOG00000010535	ENSRNOG00000019504
	ENSRNOG00000014269	ENSRNOG00000043419
	ENSRNOG00000019780	ENSRNOG00000014443
	ENSRNOG00000024880	ENSRNOG00000046858
	ENSRNOG00000027276	ENSRNOG00000020948
	ENSRNOG00000014861	ENSRNOG00000011305
	ENSRNOG00000013282	ENSRNOG00000018760
	ENSRNOG00000040109	ENSRNOG00000061146
	ENSRNOG00000008951	ENSRNOG00000036699
	ENSRNOG00000001001	ENSRNOG00000004275
	ENSRNOG00000003675	ENSRNOG00000014202
		ENSRNOG00000030149
		ENSRNOG00000010170
		ENSRNOG00000021130
		ENSRNOG00000002092
		ENSRNOG00000046007
		ENSRNOG00000048088
		ENSRNOG00000008141
		ENSRNOG00000002540
		ENSRNOG00000006418
		ENSRNOG00000019937
		ENSRNOG00000023152
		ENSRNOG00000027331
		ENSRNOG00000007999
		ENSRNOG00000008088
		ENSRNOG00000026136
		ENSRNOG00000015184
		ENSRNOG00000006717
		ENSRNOG00000000963
		ENSRNOG00000046505
		ENSRNOG00000053402
		ENSRNOG00000010029
		ENSRNOG00000040201
		ENSRNOG00000047647
		ENSRNOG00000017181
		ENSRNOG00000039745
		ENSRNOG00000016640
		ENSRNOG00000008215
		ENSRNOG00000006591
		ENSRNOG00000009870
		ENSRNOG00000051977
		ENSRNOG00000053200
		ENSRNOG00000009795
		ENSRNOG00000009465
		ENSRNOG00000031934
		ENSRNOG00000006033
		ENSRNOG00000023352
		ENSRNOG00000011677
		ENSRNOG00000056783
		ENSRNOG00000007229
		ENSRNOG00000026310
		ENSRNOG00000000383
		ENSRNOG00000016248
		ENSRNOG00000049410
		ENSRNOG00000019477
		ENSRNOG00000059245
		ENSRNOG00000047303
		ENSRNOG00000010610
		ENSRNOG00000014248
		ENSRNOG00000016595
		ENSRNOG00000054860
		ENSRNOG00000017209
		ENSRNOG00000034290
		ENSRNOG00000023601
		ENSRNOG00000021345
		ENSRNOG00000059456
		ENSRNOG00000026203
		ENSRNOG00000010375
		ENSRNOG00000046434
		ENSRNOG00000058111
		ENSRNOG00000019445
		ENSRNOG00000002916
		ENSRNOG00000027808
		ENSRNOG00000043100
		ENSRNOG00000051627
		ENSRNOG00000033134
		ENSRNOG00000021244
		ENSRNOG00000012611
		ENSRNOG00000018434
		ENSRNOG00000012494
		ENSRNOG00000010558
		ENSRNOG00000006280
		ENSRNOG00000056894
		ENSRNOG00000051285
		ENSRNOG00000007091
		ENSRNOG00000009341
		ENSRNOG00000026836
		ENSRNOG00000013140
		ENSRNOG00000014191
		ENSRNOG00000025052
		ENSRNOG00000002843
		ENSRNOG00000008533
		ENSRNOG00000039582
		ENSRNOG00000015411
		ENSRNOG00000022466
		ENSRNOG00000024580
		ENSRNOG00000018382
		ENSRNOG00000047005
		ENSRNOG00000026226
		ENSRNOG00000021569
		ENSRNOG00000024120
		ENSRNOG00000001608
		ENSRNOG00000037632
		ENSRNOG00000025051
		ENSRNOG00000018674
		ENSRNOG00000042070
		ENSRNOG00000046196
		ENSRNOG00000000487
		ENSRNOG00000014282
		ENSRNOG00000018262
		ENSRNOG00000060063
		ENSRNOG00000042547
		ENSRNOG00000001653
		ENSRNOG00000050786
		ENSRNOG00000022822
		ENSRNOG00000021004
		ENSRNOG00000013532
		ENSRNOG00000061868
		ENSRNOG00000007371
		ENSRNOG00000003794
		ENSRNOG00000029510
		ENSRNOG00000006086
		ENSRNOG00000020579
		ENSRNOG00000011658
		ENSRNOG00000038970
		ENSRNOG00000008065
		ENSRNOG00000058842
		ENSRNOG00000058646
		ENSRNOG00000060103
		ENSRNOG00000010827
		ENSRNOG00000042312
		ENSRNOG00000054437
		ENSRNOG00000054360
		ENSRNOG00000005042
		ENSRNOG00000023643
		ENSRNOG00000023989
		ENSRNOG00000014104
		ENSRNOG00000048849
		ENSRNOG00000008785
		ENSRNOG00000020699
		ENSRNOG00000050108
		ENSRNOG00000017539
		ENSRNOG00000037435
		ENSRNOG00000023338
		ENSRNOG00000019741
		ENSRNOG00000048771
		ENSRNOG00000008027
		ENSRNOG00000020480
		ENSRNOG00000003136
		ENSRNOG00000049425
		ENSRNOG00000014496
		ENSRNOG00000000394
		ENSRNOG00000023348
		ENSRNOG00000007925
		ENSRNOG00000003749
		ENSRNOG00000011521
		ENSRNOG00000008570
		ENSRNOG00000046144
		ENSRNOG00000060633
		ENSRNOG00000029938
		ENSRNOG00000017869
		ENSRNOG00000024065
		ENSRNOG00000053699
		ENSRNOG00000007261
		ENSRNOG00000013218
		ENSRNOG00000028273
		ENSRNOG00000025217
		ENSRNOG00000004155
		ENSRNOG00000052979
		ENSRNOG00000061869
		ENSRNOG00000008936
		ENSRNOG00000002802
		ENSRNOG00000052190
		ENSRNOG00000057499
		ENSRNOG00000017918
		ENSRNOG00000052188
		ENSRNOG00000007539
		ENSRNOG00000057696
		ENSRNOG00000020875
		ENSRNOG00000015260
		ENSRNOG00000023337
		ENSRNOG00000014705
		ENSRNOG00000002273
		ENSRNOG00000017409
		ENSRNOG00000015052
		ENSRNOG00000004575
		ENSRNOG00000013767
		ENSRNOG00000008834
		ENSRNOG00000013240
		ENSRNOG00000047439
		ENSRNOG00000011820
		ENSRNOG00000011145
		ENSRNOG00000007797
		ENSRNOG00000017766
		ENSRNOG00000053317
		ENSRNOG00000002097
		ENSRNOG00000021256
		ENSRNOG00000020150
		ENSRNOG00000003694
		ENSRNOG00000033579
		ENSRNOG00000060818
		ENSRNOG00000027024
		ENSRNOG00000023659
		ENSRNOG00000003683
		ENSRNOG00000026128
		ENSRNOG00000049491
		ENSRNOG00000011363
		ENSRNOG00000004448
		ENSRNOG00000049937
		ENSRNOG00000031598
		ENSRNOG00000004805
		ENSRNOG00000004571
		ENSRNOG00000048951
		ENSRNOG00000013092
		ENSRNOG00000000837
		ENSRNOG00000013463
		ENSRNOG00000026280
		ENSRNOG00000001528
		ENSRNOG00000011841
		ENSRNOG00000002599
		ENSRNOG00000009539
		ENSRNOG00000021098
		ENSRNOG00000001296
		ENSRNOG00000049943
		ENSRNOG00000053529
		ENSRNOG00000009815
		ENSRNOG00000007126
		ENSRNOG00000026344
		ENSRNOG00000003992
		ENSRNOG00000042990
		ENSRNOG00000022426
		ENSRNOG00000016535
		ENSRNOG00000013179
		ENSRNOG00000025338
		ENSRNOG00000016378
		ENSRNOG00000005067
		ENSRNOG00000004736
		ENSRNOG00000054497
		ENSRNOG00000003209
		ENSRNOG00000021323
		ENSRNOG00000007461
		ENSRNOG00000017601
		ENSRNOG00000042524
		ENSRNOG00000014378
		ENSRNOG00000037167
		ENSRNOG00000055672
		ENSRNOG00000009565
		ENSRNOG00000030170
		ENSRNOG00000010906
		ENSRNOG00000000373
		ENSRNOG00000001554
		ENSRNOG00000000418
		ENSRNOG00000025151
		ENSRNOG00000007636
		ENSRNOG00000016085
		ENSRNOG00000000137
		ENSRNOG00000027008
		ENSRNOG00000015024
		ENSRNOG00000011683
		ENSRNOG00000017412
		ENSRNOG00000003554
		ENSRNOG00000008412
		ENSRNOG00000021018
		ENSRNOG00000049633
		ENSRNOG00000061630
		ENSRNOG00000046195
		ENSRNOG00000059949
		ENSRNOG00000006235
		ENSRNOG00000027125
		ENSRNOG00000001962
		ENSRNOG00000008869
		ENSRNOG00000006569
		ENSRNOG00000013415
		ENSRNOG00000018752
		ENSRNOG00000008086
		ENSRNOG00000010919
		ENSRNOG00000020797
		ENSRNOG00000007970
		ENSRNOG00000060179
		ENSRNOG00000000907
		ENSRNOG00000018257
		ENSRNOG00000014573
		ENSRNOG00000012363
		ENSRNOG00000013745
		ENSRNOG00000054438
		ENSRNOG00000014311
		ENSRNOG00000036728
		ENSRNOG00000019695
		ENSRNOG00000023209
		ENSRNOG00000049192
		ENSRNOG00000016756
		ENSRNOG00000006930
		ENSRNOG00000003893
		ENSRNOG00000027540
		ENSRNOG00000019118
		ENSRNOG00000050534
		ENSRNOG00000025998
		ENSRNOG00000002322
		ENSRNOG00000045764
		ENSRNOG00000018606
		ENSRNOG00000034139
		ENSRNOG00000018944
		ENSRNOG00000002771
		ENSRNOG00000046147
		ENSRNOG00000033581
		ENSRNOG00000045733
		ENSRNOG00000001419
		ENSRNOG00000045738
		ENSRNOG00000024557
		ENSRNOG00000016420
		ENSRNOG00000030726
		ENSRNOG00000020431
		ENSRNOG00000013162
		ENSRNOG00000036692
		ENSRNOG00000028077
		ENSRNOG00000023633
		ENSRNOG00000038478
		ENSRNOG00000014059
		ENSRNOG00000002224
		ENSRNOG00000008989
		ENSRNOG00000026702
		ENSRNOG00000048932
		ENSRNOG00000000552
		ENSRNOG00000051470
		ENSRNOG00000031851
		ENSRNOG00000036834
		ENSRNOG00000053577
		ENSRNOG00000056826
		ENSRNOG00000055564
		ENSRNOG00000020407
		ENSRNOG00000042105
		ENSRNOG00000010799
		ENSRNOG00000053891
		ENSRNOG00000031398
		ENSRNOG00000014124
		ENSRNOG00000030151
		ENSRNOG00000004854
		ENSRNOG00000020685
		ENSRNOG00000020349
		ENSRNOG00000004311
		ENSRNOG00000014264
		ENSRNOG00000053113
		ENSRNOG00000016070
		ENSRNOG00000058699
		ENSRNOG00000007206
		ENSRNOG00000000442
		ENSRNOG00000010661
		ENSRNOG00000011533
		ENSRNOG00000011411
		ENSRNOG00000022146
		ENSRNOG00000002345
		ENSRNOG00000036837
		ENSRNOG00000032180
		ENSRNOG00000000156
		ENSRNOG00000019422
		ENSRNOG00000004117
		ENSRNOG00000060460
		ENSRNOG00000026466
		ENSRNOG00000059698
		ENSRNOG00000033234
		ENSRNOG00000013920
		ENSRNOG00000012521
		ENSRNOG00000011668
		ENSRNOG00000022893
		ENSRNOG00000026432
		ENSRNOG00000019412
		ENSRNOG00000016679
		ENSRNOG00000057221
		ENSRNOG00000019082
		ENSRNOG00000007129
		ENSRNOG00000007372
		ENSRNOG00000018681
		ENSRNOG00000050746
		ENSRNOG00000010888
		ENSRNOG00000011854
		ENSRNOG00000017560
		ENSRNOG00000005731
		ENSRNOG00000061359
		ENSRNOG00000045646
		ENSRNOG00000012470
		ENSRNOG00000010997
		ENSRNOG00000018494
		ENSRNOG00000012965
		ENSRNOG00000007270
		ENSRNOG00000014761
		ENSRNOG00000003068
		ENSRNOG00000012174
		ENSRNOG00000001158
		ENSRNOG00000059927
		ENSRNOG00000027582
		ENSRNOG00000015674
		ENSRNOG00000052594
		ENSRNOG00000010158
		ENSRNOG00000013237
		ENSRNOG00000003300
		ENSRNOG00000002592
		ENSRNOG00000028566
		ENSRNOG00000015105
		ENSRNOG00000006911
		ENSRNOG00000018915
		ENSRNOG00000027888
		ENSRNOG00000005882
		ENSRNOG00000053075
		ENSRNOG00000014231
		ENSRNOG00000010417
		ENSRNOG00000013583
		ENSRNOG00000046763
		ENSRNOG00000061160
		ENSRNOG00000014603
		ENSRNOG00000058375
		ENSRNOG00000033575
		ENSRNOG00000025736
		ENSRNOG00000049918
		ENSRNOG00000027739
		ENSRNOG00000032240
		ENSRNOG00000008416
		ENSRNOG00000003284
		ENSRNOG00000012862
		ENSRNOG00000048231
		ENSRNOG00000020836
		ENSRNOG00000021086
		ENSRNOG00000005409
		ENSRNOG00000030012
		ENSRNOG00000038744
		ENSRNOG00000003028
		ENSRNOG00000003984
		ENSRNOG00000022953
		ENSRNOG00000008575
		ENSRNOG00000010450
		ENSRNOG00000051221
		ENSRNOG00000042468
		ENSRNOG00000021105
		ENSRNOG00000018018
		ENSRNOG00000014424
		ENSRNOG00000051181
		ENSRNOG00000059660
		ENSRNOG00000015599
		ENSRNOG00000007354
		ENSRNOG00000010065
		ENSRNOG00000020803
		ENSRNOG00000011313
		ENSRNOG00000007887
		ENSRNOG00000032086
		ENSRNOG00000025522
		ENSRNOG00000016872
		ENSRNOG00000011120
		ENSRNOG00000028768
		ENSRNOG00000012208
		ENSRNOG00000004676
		ENSRNOG00000060241
		ENSRNOG00000045846
		ENSRNOG00000005215
		ENSRNOG00000022635
		ENSRNOG00000022141
		ENSRNOG00000020783
		ENSRNOG00000016980
		ENSRNOG00000024479
		ENSRNOG00000018485
		ENSRNOG00000049177
		ENSRNOG00000037371
		ENSRNOG00000021101
		ENSRNOG00000054515
		ENSRNOG00000061530
		ENSRNOG00000038999
		ENSRNOG00000048222
		ENSRNOG00000023007
		ENSRNOG00000052122
		ENSRNOG00000003784
		ENSRNOG00000022921
		ENSRNOG00000029980
		ENSRNOG00000047230
		ENSRNOG00000055689
		ENSRNOG00000060559
		ENSRNOG00000037799
		ENSRNOG00000029235
		ENSRNOG00000020309
		ENSRNOG00000028668
		ENSRNOG00000013820
		ENSRNOG00000004645
		ENSRNOG00000005062
		ENSRNOG00000019518
		ENSRNOG00000056746
		ENSRNOG00000015196
		ENSRNOG00000013419
		ENSRNOG00000061247
		ENSRNOG00000033844
		ENSRNOG00000016358
		ENSRNOG00000021724
		ENSRNOG00000038771
		ENSRNOG00000005009
		ENSRNOG00000011100
		ENSRNOG00000055404
		ENSRNOG00000023814
		ENSRNOG00000019193
		ENSRNOG00000000857
		ENSRNOG00000061816
[truncated: 287 more rows]
