# Supplementary material for: Effect of high glucose on the gene expression profiling in cardiac fibroblasts from rats at different ages
Source: PeerJ journal article supplement (doi:10.7717/peerj.19040), 2025-03-03
Supplement: Fig5Data.xlsx [file Fig5Data.xlsx]

## Sheet: Up in four comparative groups
DEGs in each comparative group				Genes unique to each comparative group				Common up genes in two groupa					Common up genes in three groups
1H-1N	2H-2N	3H-3N	4H-4N	1H-1N	2H-2N	3H-3N	4H-4N	1H-1N|2H-2N	1H-1N|3H-3N	1H-1N|4H-4N	2H-2N|3H-3N	3H-3N|4H-4N	1H-1N|2H-2N|3H-3N	2H-2N|3H-3N|4H-4N
Cyp1a1	Serpinb2	Olr1	Rps20	Cyp1a1	Lvrn	Olr1	Rps20	Paqr5	Tfpi2	Plekhd1	Serpinb2	LOC498675	Slco4a1	Slc6a12
Slco4a1	Cxcl1	Taf9	Hoxd13	Aldh3a1	Dlx4	Taf9	Hoxd13	AABR07005593.1	Il6			Nup210l	Tgm1
Aldh3a1	Lvrn	Esrp2	Nmu	Cnnm1	Dnase1	Esrp2	Nmu	Cxcl1	Plekhs1			Plag1
Paqr5	Dlx4	Rgs2	Rhoh	Clca2	Adra1a	Rgs2	Rhoh	Rn60_10_0890.5
Cnnm1	Dnase1	Nr4a3	Rassf6	Cxcl3	LOC361108	Nr4a3	Rassf6	Spint1
AABR07005593.1	Adra1a	Gnpnat1	Car4	Kng1l1	Ddit4l2	Gnpnat1	Car4	Nwd1
Tfpi2	LOC361108	Slco4a1	Slc25a47	AABR07044454.1	Cel	Rgs16	Slc25a47
Clca2	Ddit4l2	Tfpi2	Erbb3	Pkhd1l1	Pard6b	Nkx6-1	Erbb3
Cxcl3	Cel	Rgs16	Lrrc69	Ccl2	Atp1b2	Trim72	Lrrc69
Plekhd1	Pard6b	Plekhs1	Plag1	Elf5	Irx3	Rn60_1_0435.2	1700109H08Rik
Kng1l1	Atp1b2	Serpinb2	1700109H08Rik	Rorb	Grin1	Il11	Il22ra2
AABR07044454.1	Irx3	Nkx6-1	Il22ra2	Ccl7	Hp	Adrb1	Dok3
Pkhd1l1	Grin1	Trim72	Slc6a12	Wfdc18	Fbp1	Cd101	Ctrc
Ccl2	Spint1	Rn60_1_0435.2	Dok3	Vwc2	Msx2	Cxcr4	Dusp2
Elf5	Slc6a12	Il11	Ctrc	AABR07012775.1	Phlda2	C1qc	Cml3
Rorb	Paqr5	Adrb1	Dusp2	RT1-CE6	Ovol1	Gp1bb	Prkcq
Ccl7	Hp	Cd101	Cml3	Gsta5	Fgf21	Csrnp1	Ocstamp
Cxcl1	Fbp1	Cxcr4	Prkcq	AABR07032657.1	Lsr	Socs1	Htr4
Wfdc18	Msx2	C1qc	Ocstamp	Tnfsf4	Zfp711	Hcar2	Lrrc4b
Il6	Tgm1	Gp1bb	Htr4	Gpr68	LOC691215	Krt23	Tmem145
Plekhs1	Phlda2	Csrnp1	Lrrc4b	Klrb1b	Tppp	Cldn3	Sez6l
Vwc2	Ovol1	Socs1	Tmem145	Rn60_5_0825.2	LOC682512	Npas4	Olig1
Rn60_10_0890.5	Fgf21	Hcar2	Sez6l	Ptgs2	P2rx2	Ptch2	Gbp4
AABR07012775.1	Lsr	Il6	Olig1	Myl6b	Cd86	Lef1	Thsd7a
RT1-CE6	Zfp711	Krt23	Gbp4	Ccno	Slc44a5	Vgll2	AABR07004397.1
Gsta5	LOC691215	Cldn3	Thsd7a	Dnajb13	Klhdc4	Foxn1	Havcr2
AABR07032657.1	Tppp	Npas4	AABR07004397.1	AABR07071659.2	Chrm2	Chrnb1	Klra2
Tnfsf4	LOC682512	Ptch2	Havcr2	Csf3	Nat8l	LOC100911963	Tmprss9
Spint1	P2rx2	Lef1	Klra2	Ccl20	Chrm3	Chrdl2	RGD1560470
Gpr68	Cd86	Vgll2	Tmprss9	Maob	Myl4	Grem2	Npb
Klrb1b	Slc44a5	Foxn1	RGD1560470	RGD1307391	G6pc	LOC100362344	Prss22
Rn60_5_0825.2	Klhdc4	LOC498675	Npb	Bdkrb1	AABR07030890.1	Casz1	Foxg1
Ptgs2	Chrm2	Chrnb1	Plekhd1	Angptl4	Xkrx	Gpr135	Emr4
Myl6b	Nat8l	LOC100911963	Prss22	Guca2a	Fam73a	Lhx4	Vps25
Ccno	Chrm3	Chrdl2	LOC498675	Agmat	Tmem52b	Klhdc8a	AABR07002885.1
Dnajb13	Myl4	Grem2	Foxg1	Angptl6	AABR07010121.1	AABR07030603.1	Dhh
AABR07071659.2	Rn60_10_0890.5	LOC100362344	Emr4	RGD1560289	Zdhhc23	Trpm3	Tnip3
Csf3	G6pc	Casz1	Vps25	Slamf7		Prss56	AABR07049148.1
Ccl20	Nwd1	Gpr135	AABR07002885.1	Krt17		Fgf11	Ttc23l
Maob	AABR07030890.1	Lhx4	Dhh	AABR07027371.1		Nptx2	AC105485.2
RGD1307391	Slco4a1	Klhdc8a	Tnip3	Kcnj12		Ch25h	SNORA27
Bdkrb1	Xkrx	AABR07030603.1	AABR07049148.1	Cxcl6		C4bpb	AC106292.2
Angptl4	AABR07005593.1	Trpm3	Nup210l	Galnt13		LOC501233	AABR07027870.2
Guca2a	Fam73a	Prss56	Ttc23l	Ptges		Ccdc103
Agmat	Tmem52b	Fgf11	AC105485.2	Camk1g		Lag3
Angptl6	AABR07010121.1	Nptx2	SNORA27	Ntn3		Ccdc94
RGD1560289	Zdhhc23	Ch25h	AC106292.2	Cd8b		Muc13
Slamf7		C4bpb	AABR07027870.2	Inhbe		Trim9
Krt17		LOC501233		Gkn2		Syt1
AABR07027371.1		Ccdc103		Tifab		LOC500227
Kcnj12		Lag3		Fat2		Adrb3
Cxcl6		Ccdc94		Rassf10		Rn60_X_0713.5
Galnt13		Muc13		LOC56764		Tmem63c
Ptges		Tgm1		Slc14a1		Tnfsf15
Camk1g		Trim9		Bglap		Siglec5
Ntn3		Syt1		Ppapdc1a		Oscar
Cd8b		LOC500227		Ascl2		Cdh1
Inhbe		Adrb3		Cdc42ep2		Tmie
Gkn2		Rn60_X_0713.5		Lrrtm4		Crct1
Tifab		Nup210l		Cxcl9		Esrrb
Fat2		Tmem63c		Ankrd35		LOC100364027
Rassf10		Slc6a12		Scml4		Resp18
LOC56764		Tnfsf15		Csf2		Impg2
Slc14a1		Plag1		Zc2hc1c		Sncaip
Bglap		Siglec5		AABR07072539.1		Perm1
Tgm1		Oscar		AABR07067457.1		Xkr4
Ppapdc1a		Cdh1		RGD1560997		Sncg
Ascl2		Tmie		Plk5		Rims1
Cdc42ep2		Crct1		Fmo1		Ankrd24
Lrrtm4		Esrrb		Pik3c2g		Plcd4
Cxcl9		LOC100364027		Siah3		AABR07066798.1
Ankrd35		Resp18		Il2rb		Lad1
Scml4		Impg2		Pspn		Hs3st6
Csf2		Sncaip		LOC100911068		Arid4b
Zc2hc1c		Perm1		Hist1h2ah		Slc38a5
AABR07072539.1		Xkr4		Soat2
AABR07067457.1		Sncg		AABR07016578.1
RGD1560997		Rims1		Ak7
Plk5		Ankrd24		ENSRNOG00000056537
Fmo1		Plcd4		Lipn
Pik3c2g		AABR07066798.1		AABR07044001.4
Siah3		Lad1		AABR07001929.1
Il2rb		Hs3st6
Pspn		Arid4b
LOC100911068		Slc38a5
Hist1h2ah
Nwd1
Soat2
AABR07016578.1
Ak7
ENSRNOG00000056537
Lipn
AABR07044001.4
AABR07001929.1

## Sheet: Down in four comparative groups
DEGs in each comparative group				Genes unique to each comparative group				Common up genes in two groupa					Common up genes in three groups				Common up genes in four groups
1H-1N	2H-2N	3H-3N	4H-4N	1H-1N	2H-2N	3H-3N	4H-4N	1H-1N|2H-2N	1H-1N|3H-3N	1H-1N|4H-4N	2H-2N|3H-3N	2H-2N|4H-4N	3H-3N|4H-4N	1H-1N|2H-2N|3H-3N	1H-1N|2H-2N|4H-4N	2H-2N|3H-3N|4H-4N	1H-1N|2H-2N|3H-3N|4H-4N
Pigc	LOC100910255	Smpd3	Rn60_10_0890.5	Pigc	RGD1310495	Adamts15	Rn60_10_0890.5	Esyt3	Slc12a8	Plcxd3	LOC100910255	Tmem25	Drp2	Bfsp1	Oprd1	Smpd3	Slc16a6
Marveld2	Slc16a6	Adamts15	Drp2	Marveld2	Gstt3	Dixdc1	Tmie	Syn1	AC127756.1	Cngb1	AABR07068590.1	Afmid	Fam198a
Cldn5	Smpd3	Dixdc1	Tmie	Cldn5	Thegl	Dhrs3	Abhd3	LOC102553099	Map2k6	Nkapl		Akap3	Clmn
Slc12a8	RGD1310495	Dhrs3	Fam198a	Fam170b	Faslg	Spta1	Phkg1		Ppp1r42				Cyp2d4
Fam170b	Gstt3	Spta1	Abhd3	Prom1	Slc6a4	Ccdc37	Srrm4		Sprn				Ednra
Prom1	Thegl	Ccdc37	Slc16a6	Samd14	Lct	Arhgap20	Tnn						MGC109340
Samd14	Faslg	Drp2	Smpd3	AABR07055191.1	Map3k19	Pik3ip1	Magea11						Fgd2
AABR07055191.1	Slc6a4	Arhgap20	Fgd2	Gpr150	Frmd3	AABR07012047.1	Wnt16						LOC680693
Gpr150	Lct	Pik3ip1	Phkg1	Ddx3y	Myo5c	Rn60_2_1764.2	Slurp1						Oas1k
Ddx3y	Map3k19	Fam198a	Srrm4	Rxrg	Capn3	Clcn4	Unc79
Rxrg	Bfsp1	AABR07012047.1	Tnn	Baiap2l2	Ccm2l	LOC691083	Clip4
Slc16a6	Frmd3	Rn60_2_1764.2	Magea11	Slc28a3	Clcnkb	Synpo2	Arpp21
Baiap2l2	Myo5c	LOC100910255	Wnt16	Gramd2	Tmod2	Pdzd7	Dnase1l3
Slc28a3	Capn3	Clcn4	Slurp1	AABR07005837.2	Rem2	Zfp964	Prr15
Esyt3	Ccm2l	LOC691083	Unc79	Rdh5	Perp	Slc6a7	Kcnh2
Gramd2	Clcnkb	Synpo2	Clip4	Ret	Snai3	RGD1559575	Scg3
AABR07005837.2	Syn1	Clmn	Arpp21	Mybph	Amhr2	Mettl15	Aldh1b1
AC127756.1	Tmod2	Pdzd7	Dnase1l3	Galntl5	Adgrg1	Htr2b	Col9a2
Rdh5	Oprd1	Zfp964	Prr15	Nr0b2	Ankdd1a	Adamts3	Grin1
Map2k6	Rem2	Ppp1r42	Kcnh2	Ints1	Gas2	Aqp11	Slc36a2
Ret	Perp	Slc6a7	Oprd1	Srsf12	Cacnb2	Ribc1	Rrad
Mybph	Snai3	RGD1559575	Scg3	Cracr2a	Dlk2	Mfsd4	Ppm1j
Galntl5	Tmem25	Mettl15	Clmn	Ptpn20	Ccdc24	Strip2	Gpr18
Nr0b2	Amhr2	Htr2b	Aldh1b1	Crispld1	Bglap	Tsga10	Mlf1
Syn1	Adgrg1	Adamts3	Col9a2	Wdr66	Disc1	Wnt10b	Ntrk1
Plcxd3	Ankdd1a	Cyp2d4	Grin1	Clvs2	Tssk4	Shbg	Ddb2
Ints1	Gas2	Aqp11	Slc36a2	Tmem179	Slc17a7	Slc23a3	Rnf151
Srsf12	Cacnb2	Map2k6	Rrad	Ctxn3	Hist1h2af	Kcnn1	Trim66
Cracr2a	Dlk2	Ribc1	Ppm1j	Camk2n2	Cep70	Fam13c	Dnaaf1
Ptpn20	Ccdc24	Mfsd4	Gpr18	AC117058.1	Rimbp2	LOC497899	Sigirr
Crispld1	Bglap	Strip2	Ednra	Rn60_20_0051.7	Sp6	Slc8a3	Gucy2g
Wdr66	Disc1	Tsga10	Mlf1	Cdh16	Fer1l5	Ntf3	Wnk2
Bfsp1	Tssk4	Wnt10b	Ntrk1	Slc39a5	Shisa3	Sh2d2a	Adamts16
Ppp1r42	Slc17a7	Shbg	Ddb2	AABR07062694.1	Tmem116	Cer1	Hist1h1a
Clvs2	Hist1h2af	Slc23a3	Rnf151	Ikzf2	Slc51b	RGD1307391	Il34
Tmem179	Esyt3	Kcnn1	Tmem25	Cyb561	Nfasc	Rad9b	Slc12a5
Sprn	Cep70	Fam13c	Trim66	Crhr2	Ccl24	Mx1	Tmem221
Ctxn3	Rimbp2	LOC497899	Plcxd3	Pkdrej	ENSRNOG00000031202	RGD1562963	C1qtnf3
Camk2n2	Sp6	Slc8a3	Dnaaf1	Tmem100	Ttc21a	Magee2	AABR07071746.1
AC117058.1	Fer1l5	Ntf3	Sigirr	Krt19	AC097183.1	Tc2n	Zfp385b
Rn60_20_0051.7	Shisa3	Sh2d2a	Gucy2g	Cd6	Calr4	RT1-M2	Pcdh12
Cdh16	Tmem116	Ednra	Wnk2	RGD1309036	Ecscr	Megf6	Tas1r3
Slc39a5	Slc51b	Cer1	Adamts16	Gp1bb	Abca17	Tnfrsf4	Artn
AABR07062694.1	Nfasc	RGD1307391	Hist1h1a	Vps25	Lmo3	C2	Rhbdl1
Ikzf2	Ccl24	Rad9b	Il34	AABR07035802.1	AABR07020847.1	Spns2	Il4i1
Cyb561	ENSRNOG00000031202	Mx1	Slc12a5	AABR07062775.1	LOC100910772	AABR07000385.2	Tulp2
Crhr2	Ttc21a	RGD1562963	Tmem221	Ckmt2	B4galnt4	Adcy10	Mzb1
Pkdrej	AC097183.1	AC127756.1	C1qtnf3	AABR07008066.3	AABR07065049.2	Mfrp	Zmynd12
Tmem100	Calr4	Magee2	AABR07071746.1	AABR07001634.1	AABR07012065.1	AABR07042904.1	Rad21l1
Oprd1	Ecscr	Tc2n	Zfp385b	AABR07027309.1	AABR07044049.1	Daw1	Skint10
Krt19	Abca17	RT1-M2	Pcdh12	Gper1	Ccdc64	Ccdc27	Raet1d
Cd6	Lmo3	Megf6	Tas1r3	Gnaz	Otx1	Camk2a	Ccdc155
RGD1309036	AABR07020847.1	Tnfrsf4	Artn	Cyyr1	RT1-CE6	AC099449.1	Pkd2l2
Gp1bb	LOC102553099	C2	Rhbdl1	Gdap1		Cdhr2	Wdr86
Vps25	LOC100910772	Spns2	Il4i1	Adhfe1		Svip	Ms4a14
AABR07035802.1	Afmid	MGC109340	Tulp2	Slc45a3		Ccer2	Ip6k3
AABR07062775.1	B4galnt4	AABR07000385.2	Mzb1	Pdzd3		LOC684238	Gpr137c
Ckmt2	AABR07065049.2	Adcy10	Zmynd12	Rho		Klhdc9	Xrra1
AABR07008066.3	AABR07012065.1	Mfrp	Rad21l1	Cmbl		Batf	Hcar2
AABR07001634.1	AABR07044049.1	AABR07042904.1	Skint10	Arhgef4		Cdnf	Scn4b
AABR07027309.1	Ccdc64	Daw1	Raet1d	Nell1		Mycbpap	Lhfpl1
Gper1	AABR07068590.1	Ccdc27	Ccdc155	Spata1		Arhgef37	Txndc2
Gnaz	Akap3	Camk2a	Pkd2l2	Pdzd9		Bcl11a	Bcl2l14
Cyyr1	Otx1	AC099449.1	Wdr86	Fam217a		AABR07062833.1	Xkr5
Gdap1	RT1-CE6	Cdhr2	Ms4a14	Adad1		Prkcg	Dgkb
Adhfe1		Svip	Ip6k3	Gimap8		Acacb	Grid2ip
Slc45a3		Ccer2	Gpr137c	Cnih2		Nudt6	Fscn2
Pdzd3		LOC684238	Xrra1	Phex		Megf10	Clca4l
Rho		Klhdc9	Hcar2	Hs3st3a1		Ablim2	LOC502618
Cmbl		Batf	Scn4b	LOC100302465		Rgs22	Btnl3
Arhgef4		Cdnf	Lhfpl1	Eps8l1		Kcnk15	Vnn3
Nell1		Mycbpap	Txndc2	Apcdd1l		Tnfsf13b	Icam4
Spata1		Arhgef37	Bcl2l14	Nanos3		Ptges	Acsm1
Pdzd9		Bcl11a	Xkr5	Fn3k		Slc44a4	Efcab2
Fam217a		AABR07062833.1	Dgkb	Mybphl		AABR07002885.1	Rnf180
Adad1		Prkcg	Grid2ip	LOC688553		Asgr1	Apoa1
Gimap8		AABR07068590.1	Cngb1	Tmem229a		Trim29	Syt14
Cnih2		Acacb	Cyp2d4	RGD1308112		Prtg	Rn60_9_0428.1
Phex		Nudt6	Oas1k	LOC685081		Wnt3	Hba2
Hs3st3a1		Megf10	LOC680693	RGD1304770		Gyltl1b	Vom2r35
LOC100302465		Fgd2	Fscn2	Mmp24		Cgn	G6pc
Eps8l1		Ablim2	Clca4l	Rad51ap2		Emid1	SCARNA2
Apcdd1l		Rgs22	LOC502618	AABR07002337.1		AABR07049148.1	AABR07025386.1
Nanos3		Kcnk15	Btnl3	AC117065.1		Epb42	SNORA75
Cngb1		Tnfsf13b	Vnn3	AC108546.1		Fam65b	AABR07070518.1
Fn3k		Ptges	Icam4	Opn4		Plac8l1	AABR07062800.1
Mybphl		Slc44a4	Acsm1	AABR07071917.1		Ano4	AABR07068030.1
LOC688553		AABR07002885.1	Efcab2	AABR07072264.3		RGD1560207	AABR07027371.1
Tmem229a		Asgr1	Rnf180	AABR07049503.1		Hsd11b2	AABR07006097.1
RGD1308112		Trim29	Apoa1			Slc27a6	U6
LOC685081		Prtg	Syt14			Adra1d	Spef2
RGD1304770		Slc12a8	Rn60_9_0428.1			RGD1565367	AABR07044418.1
Mmp24		Wnt3	MGC109340			Edar	Rn60_9_0975.2
Rad51ap2		Gyltl1b	Hba2			Yipf7	Asic1
LOC102553099		Cgn	Afmid			Fgf14	AC097038.1
AABR07002337.1		Emid1	Vom2r35			Prrt1	Asz1
AC117065.1		Bfsp1	G6pc			Hist3h3	AABR07070161.7
AC108546.1		AABR07049148.1	SCARNA2			Osm	AABR07068214.1
Opn4		Epb42	AABR07025386.1			Chd5	Rsph6a
Nkapl		Fam65b	SNORA75			Ppp2r2c	AABR07041724.2
AABR07071917.1		Plac8l1	AABR07070518.1			ENSRNOG00000051891
AABR07072264.3		Ano4	AABR07062800.1			Mpv17l
AABR07049503.1		RGD1560207	AABR07068030.1			Car4
		Hsd11b2	AABR07027371.1			Btbd16
		Slc27a6	Nkapl			AABR07012023.1
		Adra1d	AABR07006097.1			LOC100362109
		RGD1565367	U6			Cgnl1
		Edar	Spef2			Dtna
		Yipf7	AABR07044418.1			LOC103691893
		Fgf14	Akap3			Abcb9
		Prrt1	Rn60_9_0975.2			Zbtb8b
		Sprn	Asic1			Smtnl2
		Hist3h3	AC097038.1			Rab25
		Osm	Asz1			Apol3
		Slc16a6	AABR07070161.7			Ddx43
		Chd5	AABR07068214.1			LOC681458
		Ppp2r2c	Rsph6a			Tekt1
		ENSRNOG00000051891	AABR07041724.2			Syt8
		Mpv17l				Gpr88
		Car4				ENSRNOG00000061185
		Btbd16				Soga3
		AABR07012023.1				Best2
		LOC100362109				Rab19
		Cgnl1				Myo16
		LOC680693
		Dtna
		LOC103691893
		Abcb9
		Zbtb8b
		Oas1k
		Smtnl2
		Rab25
		Apol3
		Ddx43
		LOC681458
		Tekt1
		Syt8
		Gpr88
		ENSRNOG00000061185
		Soga3
		Best2
		Rab19
		Myo16
