# Supplementary material for: Effect of high glucose on the gene expression profiling in cardiac fibroblasts from rats at different ages
Source: PeerJ journal article supplement (doi:10.7717/peerj.19040), 2025-03-03
Supplement: H_vs_N_GO.xlsx [file H_vs_N_GO.xlsx]

## Sheet: S1-H vs S1-N
1H-1N
Up
Term	GO namespace	Number of DEGs	Genes
reproductive process	biological_process	7	ENSRNOG00000002525(Ptgs2),ENSRNOG00000055714(Ak7),ENSRNOG00000026805(Csf2),ENSRNOG00000007159(Ccl2),ENSRNOG00000012811(Spint1),ENSRNOG00000019500(Cyp1a1),ENSRNOG00000020434(Ascl2)
multi-organism process	biological_process	17	ENSRNOG00000026805(Csf2),ENSRNOG00000019500(Cyp1a1),ENSRNOG00000002843(Cxcl6),ENSRNOG00000002525(Ptgs2),ENSRNOG00000010278(Il6),ENSRNOG00000029778(Maob),ENSRNOG00000002802(Cxcl1),ENSRNOG00000006320(Ptges),ENSRNOG00000004488(Bdkrb1),ENSRNOG00000007159(Ccl2),ENSRNOG00000002968(Tnfsf4),ENSRNOG00000028043(Cxcl3),ENSRNOG00000008525(Csf3),ENSRNOG00000034191(Fmo1),ENSRNOG00000055714(Ak7),ENSRNOG00000015…
locomotion	biological_process	11	ENSRNOG00000015992(Ccl20),ENSRNOG00000022242(Cxcl9),ENSRNOG00000002802(Cxcl1),ENSRNOG00000028043(Cxcl3),ENSRNOG00000002525(Ptgs2),ENSRNOG00000002843(Cxcl6),ENSRNOG00000006970(Ntn3),ENSRNOG00000007159(Ccl2),ENSRNOG00000012575(Fat2),ENSRNOG00000004488(Bdkrb1),ENSRNOG00000000239(Ccl7),
cellular component organization or biogenesis	biological_process	21	ENSRNOG00000031716(AABR07072539.1),ENSRNOG00000026371(Krt17),ENSRNOG00000022242(Cxcl9),ENSRNOG00000034102(Plk5),ENSRNOG00000053769(Soat2),ENSRNOG00000007159(Ccl2),ENSRNOG00000020904(Cdc42ep2),ENSRNOG00000010454(Ccno),ENSRNOG00000010278(Il6),ENSRNOG00000049649(Hist1h2ah),ENSRNOG00000002843(Cxcl6),ENSRNOG00000008525(Csf3),ENSRNOG00000043061(Siah3),ENSRNOG00000055714(Ak7),ENSRNOG00000004488(Bdkrb1),…
localization	biological_process	21	ENSRNOG00000002802(Cxcl1),ENSRNOG00000002525(Ptgs2),ENSRNOG00000010278(Il6),ENSRNOG00000002843(Cxcl6),ENSRNOG00000012575(Fat2),ENSRNOG00000015992(Ccl20),ENSRNOG00000022242(Cxcl9),ENSRNOG00000053430(Slco4a1),ENSRNOG00000013771(Clca2),ENSRNOG00000016753(Slc14a1),ENSRNOG00000007159(Ccl2),ENSRNOG00000053769(Soat2),ENSRNOG00000029778(Maob),ENSRNOG00000002303(Kcnj12),ENSRNOG00000000239(Ccl7),ENSRNOG000…
signaling	biological_process	23	ENSRNOG00000000239(Ccl7),ENSRNOG00000014847(Rassf10),ENSRNOG00000048636(Il2rb),ENSRNOG00000026805(Csf2),ENSRNOG00000034228(Pik3c2g),ENSRNOG00000049076(Vwc2),ENSRNOG00000002968(Tnfsf4),ENSRNOG00000006470(Camk1g),ENSRNOG00000004488(Bdkrb1),ENSRNOG00000008525(Csf3),ENSRNOG00000028043(Cxcl3),ENSRNOG00000002843(Cxcl6),ENSRNOG00000046309(Gpr68),ENSRNOG00000002525(Ptgs2),ENSRNOG00000020904(Cdc42ep2),ENS…
behavior	biological_process	7	ENSRNOG00000028043(Cxcl3),ENSRNOG00000002525(Ptgs2),ENSRNOG00000010278(Il6),ENSRNOG00000022242(Cxcl9),ENSRNOG00000000239(Ccl7),ENSRNOG00000007159(Ccl2),ENSRNOG00000002843(Cxcl6)
positive regulation of biological process	biological_process	24	ENSRNOG00000026371(Krt17),ENSRNOG00000013413(Rorb),ENSRNOG00000015992(Ccl20),ENSRNOG00000034102(Plk5),ENSRNOG00000022242(Cxcl9),ENSRNOG00000008849(Guca2a),ENSRNOG00000007601(Inhbe),ENSRNOG00000002331(Aldh3a1),ENSRNOG00000007159(Ccl2),ENSRNOG00000002802(Cxcl1),ENSRNOG00000020904(Cdc42ep2),ENSRNOG00000002525(Ptgs2),ENSRNOG00000010278(Il6),ENSRNOG00000019500(Cyp1a1),ENSRNOG00000002843(Cxcl6),ENSRNOG…
biological regulation	biological_process	43	ENSRNOG00000002303(Kcnj12),ENSRNOG00000007545(Angptl4),ENSRNOG00000034228(Pik3c2g),ENSRNOG00000010513(Tfpi2),ENSRNOG00000006320(Ptges),ENSRNOG00000049076(Vwc2),ENSRNOG00000019607(Bglap),ENSRNOG00000002968(Tnfsf4),ENSRNOG00000004488(Bdkrb1),ENSRNOG00000008525(Csf3),ENSRNOG00000019500(Cyp1a1),ENSRNOG00000020904(Cdc42ep2),ENSRNOG00000010278(Il6),ENSRNOG00000020434(Ascl2),ENSRNOG00000002331(Aldh3a1),…
negative regulation of biological process	biological_process	22	ENSRNOG00000030387(Kng1l1),ENSRNOG00000008525(Csf3),ENSRNOG00000043061(Siah3),ENSRNOG00000013413(Rorb),ENSRNOG00000034102(Plk5),ENSRNOG00000022242(Cxcl9),ENSRNOG00000004488(Bdkrb1),ENSRNOG00000007159(Ccl2),ENSRNOG00000037097(Wfdc18),ENSRNOG00000020434(Ascl2),ENSRNOG00000002968(Tnfsf4),ENSRNOG00000012811(Spint1),ENSRNOG00000002525(Ptgs2),ENSRNOG00000049076(Vwc2),ENSRNOG00000010278(Il6),ENSRNOG0000…
reproduction	biological_process	7	ENSRNOG00000012811(Spint1),ENSRNOG00000019500(Cyp1a1),ENSRNOG00000020434(Ascl2),ENSRNOG00000026805(Csf2),ENSRNOG00000007159(Ccl2),ENSRNOG00000055714(Ak7),ENSRNOG00000002525(Ptgs2)
growth	biological_process	3	ENSRNOG00000026371(Krt17),ENSRNOG00000004488(Bdkrb1),ENSRNOG00000010278(Il6)
multicellular organismal process	biological_process	29	ENSRNOG00000002802(Cxcl1),ENSRNOG00000002525(Ptgs2),ENSRNOG00000010278(Il6),ENSRNOG00000019500(Cyp1a1),ENSRNOG00000002843(Cxcl6),ENSRNOG00000012575(Fat2),ENSRNOG00000013413(Rorb),ENSRNOG00000026371(Krt17),ENSRNOG00000034102(Plk5),ENSRNOG00000015992(Ccl20),ENSRNOG00000031716(AABR07072539.1),ENSRNOG00000020434(Ascl2),ENSRNOG00000020136(Tgm1),ENSRNOG00000053769(Soat2),ENSRNOG00000007159(Ccl2),ENSRNO…
biological adhesion	biological_process	6	ENSRNOG00000030387(Kng1l1),ENSRNOG00000010278(Il6),ENSRNOG00000049076(Vwc2),ENSRNOG00000002968(Tnfsf4),ENSRNOG00000012575(Fat2),ENSRNOG00000007159(Ccl2)
developmental process	biological_process	32	ENSRNOG00000006970(Ntn3),ENSRNOG00000000239(Ccl7),ENSRNOG00000007545(Angptl4),ENSRNOG00000026805(Csf2),ENSRNOG00000029778(Maob),ENSRNOG00000049076(Vwc2),ENSRNOG00000019607(Bglap),ENSRNOG00000002968(Tnfsf4),ENSRNOG00000012811(Spint1),ENSRNOG00000049171(Pspn),ENSRNOG00000000201(Gsta5),ENSRNOG00000055714(Ak7),ENSRNOG00000043061(Siah3),ENSRNOG00000008525(Csf3),ENSRNOG00000019500(Cyp1a1),ENSRNOG000000…
rhythmic process	biological_process	2	ENSRNOG00000010278(Il6),ENSRNOG00000013413(Rorb)
regulation of biological process	biological_process	42	ENSRNOG00000014847(Rassf10),ENSRNOG00000000239(Ccl7),ENSRNOG00000026805(Csf2),ENSRNOG00000048636(Il2rb),ENSRNOG00000029778(Maob),ENSRNOG00000037097(Wfdc18),ENSRNOG00000012811(Spint1),ENSRNOG00000006470(Camk1g),ENSRNOG00000030387(Kng1l1),ENSRNOG00000028043(Cxcl3),ENSRNOG00000043061(Siah3),ENSRNOG00000046309(Gpr68),ENSRNOG00000049649(Hist1h2ah),ENSRNOG00000002843(Cxcl6),ENSRNOG00000002525(Ptgs2),EN…
single-organism process	biological_process	55	ENSRNOG00000004488(Bdkrb1),ENSRNOG00000049171(Pspn),ENSRNOG00000002968(Tnfsf4),ENSRNOG00000019607(Bglap),ENSRNOG00000008525(Csf3),ENSRNOG00000055714(Ak7),ENSRNOG00000000201(Gsta5),ENSRNOG00000007545(Angptl4),ENSRNOG00000002303(Kcnj12),ENSRNOG00000049076(Vwc2),ENSRNOG00000034228(Pik3c2g),ENSRNOG00000006320(Ptges),ENSRNOG00000020136(Tgm1),ENSRNOG00000016753(Slc14a1),ENSRNOG00000053769(Soat2),ENSRNO…
response to stimulus	biological_process	40	ENSRNOG00000002802(Cxcl1),ENSRNOG00000002525(Ptgs2),ENSRNOG00000002843(Cxcl6),ENSRNOG00000046309(Gpr68),ENSRNOG00000022242(Cxcl9),ENSRNOG00000034102(Plk5),ENSRNOG00000020424(Ppapdc1a),ENSRNOG00000026371(Krt17),ENSRNOG00000034191(Fmo1),ENSRNOG00000007601(Inhbe),ENSRNOG00000007159(Ccl2),ENSRNOG00000029778(Maob),ENSRNOG00000061639(RT1-CE6),ENSRNOG00000006970(Ntn3),ENSRNOG00000048636(Il2rb),ENSRNOG00…
cell killing	biological_process	3	ENSRNOG00000002802(Cxcl1),ENSRNOG00000002843(Cxcl6),ENSRNOG00000007159(Ccl2)
cellular process	biological_process	60	ENSRNOG00000022242(Cxcl9),ENSRNOG00000008282(Elf5),ENSRNOG00000034102(Plk5),ENSRNOG00000020424(Ppapdc1a),ENSRNOG00000026371(Krt17),ENSRNOG00000034191(Fmo1),ENSRNOG00000053430(Slco4a1),ENSRNOG00000031716(AABR07072539.1),ENSRNOG00000007601(Inhbe),ENSRNOG00000007159(Ccl2),ENSRNOG00000002802(Cxcl1),ENSRNOG00000002525(Ptgs2),ENSRNOG00000002843(Cxcl6),ENSRNOG00000049921(AABR07032657.1),ENSRNOG000000496…
metabolic process	biological_process	47	ENSRNOG00000020904(Cdc42ep2),ENSRNOG00000010454(Ccno),ENSRNOG00000010278(Il6),ENSRNOG00000019500(Cyp1a1),ENSRNOG00000005335(Galnt13),ENSRNOG00000013413(Rorb),ENSRNOG00000015992(Ccl20),ENSRNOG00000020434(Ascl2),ENSRNOG00000008849(Guca2a),ENSRNOG00000002331(Aldh3a1),ENSRNOG00000020136(Tgm1),ENSRNOG00000053769(Soat2),ENSRNOG00000034228(Pik3c2g),ENSRNOG00000006320(Ptges),ENSRNOG00000010513(Tfpi2),ENS…
immune system process	biological_process	15	ENSRNOG00000004488(Bdkrb1),ENSRNOG00000007159(Ccl2),ENSRNOG00000002968(Tnfsf4),ENSRNOG00000028043(Cxcl3),ENSRNOG00000008525(Csf3),ENSRNOG00000055714(Ak7),ENSRNOG00000022242(Cxcl9),ENSRNOG00000015992(Ccl20),ENSRNOG00000000239(Ccl7),ENSRNOG00000048636(Il2rb),ENSRNOG00000026805(Csf2),ENSRNOG00000002843(Cxcl6),ENSRNOG00000061639(RT1-CE6),ENSRNOG00000010278(Il6),ENSRNOG00000002802(Cxcl1)
extracellular region part	cellular_component	27	ENSRNOG00000000239(Ccl7),ENSRNOG00000026805(Csf2),ENSRNOG00000007545(Angptl4),ENSRNOG00000012315(Agmat),ENSRNOG00000029778(Maob),ENSRNOG00000049076(Vwc2),ENSRNOG00000002968(Tnfsf4),ENSRNOG00000019607(Bglap),ENSRNOG00000012811(Spint1),ENSRNOG00000049171(Pspn),ENSRNOG00000030387(Kng1l1),ENSRNOG00000028043(Cxcl3),ENSRNOG00000008525(Csf3),ENSRNOG00000002843(Cxcl6),ENSRNOG00000012575(Fat2),ENSRNOG0000…
cell junction	cellular_component	2	ENSRNOG00000021938(Lrrtm4),ENSRNOG00000012575(Fat2)
cell	cellular_component	55	ENSRNOG00000013413(Rorb),ENSRNOG00000020434(Ascl2),ENSRNOG00000013771(Clca2),ENSRNOG00000002331(Aldh3a1),ENSRNOG00000016753(Slc14a1),ENSRNOG00000053769(Soat2),ENSRNOG00000020904(Cdc42ep2),ENSRNOG00000010454(Ccno),ENSRNOG00000010278(Il6),ENSRNOG00000019500(Cyp1a1),ENSRNOG00000005335(Galnt13),ENSRNOG00000012575(Fat2),ENSRNOG00000055714(Ak7),ENSRNOG00000000201(Gsta5),ENSRNOG00000053044(AABR07012775.…
membrane	cellular_component	36	ENSRNOG00000002331(Aldh3a1),ENSRNOG00000013771(Clca2),ENSRNOG00000053769(Soat2),ENSRNOG00000020136(Tgm1),ENSRNOG00000016753(Slc14a1),ENSRNOG00000005335(Galnt13),ENSRNOG00000019500(Cyp1a1),ENSRNOG00000012575(Fat2),ENSRNOG00000010278(Il6),ENSRNOG00000020904(Cdc42ep2),ENSRNOG00000002968(Tnfsf4),ENSRNOG00000014164(Paqr5),ENSRNOG00000004488(Bdkrb1),ENSRNOG00000007310(Klrb1b),ENSRNOG00000000201(Gsta5),…
membrane part	cellular_component	33	ENSRNOG00000002331(Aldh3a1),ENSRNOG00000013771(Clca2),ENSRNOG00000053769(Soat2),ENSRNOG00000016753(Slc14a1),ENSRNOG00000020136(Tgm1),ENSRNOG00000005335(Galnt13),ENSRNOG00000019500(Cyp1a1),ENSRNOG00000012575(Fat2),ENSRNOG00000010278(Il6),ENSRNOG00000002968(Tnfsf4),ENSRNOG00000014164(Paqr5),ENSRNOG00000004488(Bdkrb1),ENSRNOG00000000201(Gsta5),ENSRNOG00000007310(Klrb1b),ENSRNOG00000002303(Kcnj12),EN…
synapse part	cellular_component	2	ENSRNOG00000007159(Ccl2),ENSRNOG00000021938(Lrrtm4)
organelle	cellular_component	36	ENSRNOG00000012575(Fat2),ENSRNOG00000019500(Cyp1a1),ENSRNOG00000005335(Galnt13),ENSRNOG00000020904(Cdc42ep2),ENSRNOG00000010454(Ccno),ENSRNOG00000020136(Tgm1),ENSRNOG00000053769(Soat2),ENSRNOG00000020434(Ascl2),ENSRNOG00000008849(Guca2a),ENSRNOG00000002331(Aldh3a1),ENSRNOG00000013413(Rorb),ENSRNOG00000032132(RGD1560997),ENSRNOG00000017975(Dnajb13),ENSRNOG00000006320(Ptges),ENSRNOG00000010513(Tfpi…
organelle part	cellular_component	15	ENSRNOG00000002525(Ptgs2),ENSRNOG00000010454(Ccno),ENSRNOG00000019500(Cyp1a1),ENSRNOG00000049649(Hist1h2ah),ENSRNOG00000005335(Galnt13),ENSRNOG00000026371(Krt17),ENSRNOG00000032108(AABR07067457.1),ENSRNOG00000034191(Fmo1),ENSRNOG00000002331(Aldh3a1),ENSRNOG00000053769(Soat2),ENSRNOG00000029778(Maob),ENSRNOG00000017975(Dnajb13),ENSRNOG00000006320(Ptges),ENSRNOG00000000201(Gsta5),ENSRNOG00000006470…
supramolecular complex	cellular_component	1	ENSRNOG00000026371(Krt17)
cell part	cellular_component	55	ENSRNOG00000022155(RGD1560289),ENSRNOG00000048636(Il2rb),ENSRNOG00000012315(Agmat),ENSRNOG00000021938(Lrrtm4),ENSRNOG00000006970(Ntn3),ENSRNOG00000061639(RT1-CE6),ENSRNOG00000056537(-),ENSRNOG00000029778(Maob),ENSRNOG00000012811(Spint1),ENSRNOG00000006470(Camk1g),ENSRNOG00000028043(Cxcl3),ENSRNOG00000030387(Kng1l1),ENSRNOG00000004398(Pkhd1l1),ENSRNOG00000043061(Siah3),ENSRNOG00000049649(Hist1h2ah…
extracellular region	cellular_component	30	ENSRNOG00000022242(Cxcl9),ENSRNOG00000015992(Ccl20),ENSRNOG00000026371(Krt17),ENSRNOG00000031716(AABR07072539.1),ENSRNOG00000002331(Aldh3a1),ENSRNOG00000007601(Inhbe),ENSRNOG00000008849(Guca2a),ENSRNOG00000007159(Ccl2),ENSRNOG00000020136(Tgm1),ENSRNOG00000002802(Cxcl1),ENSRNOG00000020603(Angptl6),ENSRNOG00000010278(Il6),ENSRNOG00000002843(Cxcl6),ENSRNOG00000012575(Fat2),ENSRNOG00000028043(Cxcl3),…
synapse	cellular_component	2	ENSRNOG00000007159(Ccl2),ENSRNOG00000021938(Lrrtm4)
membrane-enclosed lumen	cellular_component	4	ENSRNOG00000002331(Aldh3a1),ENSRNOG00000049649(Hist1h2ah),ENSRNOG00000010454(Ccno),ENSRNOG00000006320(Ptges)
macromolecular complex	cellular_component	11	ENSRNOG00000006470(Camk1g),ENSRNOG00000032108(AABR07067457.1),ENSRNOG00000053044(AABR07012775.1),ENSRNOG00000049649(Hist1h2ah),ENSRNOG00000032132(RGD1560997),ENSRNOG00000049921(AABR07032657.1),ENSRNOG00000056537(-),ENSRNOG00000002525(Ptgs2),ENSRNOG00000061639(RT1-CE6),ENSRNOG00000010278(Il6),ENSRNOG00000049076(Vwc2)
molecular transducer activity	molecular_function	9	ENSRNOG00000004488(Bdkrb1),ENSRNOG00000014164(Paqr5),ENSRNOG00000013771(Clca2),ENSRNOG00000026371(Krt17),ENSRNOG00000013413(Rorb),ENSRNOG00000046309(Gpr68),ENSRNOG00000048636(Il2rb),ENSRNOG00000002303(Kcnj12),ENSRNOG00000023209(Slamf7)
nucleic acid binding transcription factor activity	molecular_function	3	ENSRNOG00000008282(Elf5),ENSRNOG00000020434(Ascl2),ENSRNOG00000013413(Rorb)
binding	molecular_function	52	ENSRNOG00000026110(Scml4),ENSRNOG00000020904(Cdc42ep2),ENSRNOG00000016926(Plekhs1),ENSRNOG00000010278(Il6),ENSRNOG00000019500(Cyp1a1),ENSRNOG00000005335(Galnt13),ENSRNOG00000028837(Myl6b),ENSRNOG00000012575(Fat2),ENSRNOG00000013413(Rorb),ENSRNOG00000015992(Ccl20),ENSRNOG00000020434(Ascl2),ENSRNOG00000020136(Tgm1),ENSRNOG00000053769(Soat2),ENSRNOG00000034228(Pik3c2g),ENSRNOG00000017975(Dnajb13),EN…
structural molecule activity	molecular_function	5	ENSRNOG00000026371(Krt17),ENSRNOG00000053044(AABR07012775.1),ENSRNOG00000019607(Bglap),ENSRNOG00000049921(AABR07032657.1),ENSRNOG00000032132(RGD1560997)
catalytic activity	molecular_function	19	ENSRNOG00000006470(Camk1g),ENSRNOG00000043061(Siah3),ENSRNOG00000000201(Gsta5),ENSRNOG00000055714(Ak7),ENSRNOG00000012315(Agmat),ENSRNOG00000029778(Maob),ENSRNOG00000034228(Pik3c2g),ENSRNOG00000006320(Ptges),ENSRNOG00000020136(Tgm1),ENSRNOG00000053769(Soat2),ENSRNOG00000002331(Aldh3a1),ENSRNOG00000034191(Fmo1),ENSRNOG00000020424(Ppapdc1a),ENSRNOG00000034102(Plk5),ENSRNOG00000057173(Lipn),ENSRNOG0…
antioxidant activity	molecular_function	1	ENSRNOG00000002525(Ptgs2)
signal transducer activity	molecular_function	5	ENSRNOG00000046309(Gpr68),ENSRNOG00000048636(Il2rb),ENSRNOG00000004488(Bdkrb1),ENSRNOG00000013413(Rorb),ENSRNOG00000026371(Krt17)
transporter activity	molecular_function	4	ENSRNOG00000053430(Slco4a1),ENSRNOG00000002303(Kcnj12),ENSRNOG00000013771(Clca2),ENSRNOG00000016753(Slc14a1)
molecular function regulator	molecular_function	7	ENSRNOG00000037097(Wfdc18),ENSRNOG00000007545(Angptl4),ENSRNOG00000012811(Spint1),ENSRNOG00000008849(Guca2a),ENSRNOG00000020904(Cdc42ep2),ENSRNOG00000030387(Kng1l1),ENSRNOG00000010513(Tfpi2)
Down
Term	GO namespace	Number of DEGs	Genes
reproductive process	biological_process	6	ENSRNOG00000029591(Pkdrej),ENSRNOG00000040301(Galntl5),ENSRNOG00000004437(Map2k6),ENSRNOG00000014233(Krt19),ENSRNOG00000017246(Adad1),ENSRNOG00000031593(Nanos3)
multi-organism process	biological_process	4	ENSRNOG00000017246(Adad1),ENSRNOG00000029591(Pkdrej),ENSRNOG00000040301(Galntl5),ENSRNOG00000031593(Nanos3)
locomotion	biological_process	2	ENSRNOG00000014751(Ret),ENSRNOG00000001287(Gper1)
cellular component organization or biogenesis	biological_process	16	ENSRNOG00000014751(Ret),ENSRNOG00000012122(Clvs2),ENSRNOG00000031773(Cngb1),ENSRNOG00000005850(Gdap1),ENSRNOG00000001792(Slc12a8),ENSRNOG00000014233(Krt19),ENSRNOG00000001287(Gper1),ENSRNOG00000011145(Crhr2),ENSRNOG00000010531(Oprd1),ENSRNOG00000027942(Eps8l1),ENSRNOG00000051383(Srsf12),ENSRNOG00000004537(Rxrg),ENSRNOG00000052167(Marveld2),ENSRNOG00000002434(Tmem100),ENSRNOG00000014035(Arhgef4),E…
localization	biological_process	25	ENSRNOG00000004437(Map2k6),ENSRNOG00000031773(Cngb1),ENSRNOG00000005850(Gdap1),ENSRNOG00000001792(Slc12a8),ENSRNOG00000051179(Vps25),ENSRNOG00000012122(Clvs2),ENSRNOG00000001287(Gper1),ENSRNOG00000010365(Syn1),ENSRNOG00000011145(Crhr2),ENSRNOG00000007591(Slc45a3),ENSRNOG00000018927(Sprn),ENSRNOG00000020884(Cd6),ENSRNOG00000020247(Cnih2),ENSRNOG00000042918(RGD1304770),ENSRNOG00000000245(Slc16a6),E…
signaling	biological_process	23	ENSRNOG00000014035(Arhgef4),ENSRNOG00000012215(Baiap2l2),ENSRNOG00000033361(Slc39a5),ENSRNOG00000002434(Tmem100),ENSRNOG00000004537(Rxrg),ENSRNOG00000031593(Nanos3),ENSRNOG00000008526(Pdzd3),ENSRNOG00000027942(Eps8l1),ENSRNOG00000007229(Nr0b2),ENSRNOG00000010531(Oprd1),ENSRNOG00000001287(Gper1),ENSRNOG00000001313(Gnaz),ENSRNOG00000011145(Crhr2),ENSRNOG00000010365(Syn1),ENSRNOG00000038184(Camk2n2)…
behavior	biological_process	2	ENSRNOG00000010531(Oprd1),ENSRNOG00000011145(Crhr2)
positive regulation of biological process	biological_process	17	ENSRNOG00000020884(Cd6),ENSRNOG00000014751(Ret),ENSRNOG00000004437(Map2k6),ENSRNOG00000001287(Gper1),ENSRNOG00000027430(Ikzf2),ENSRNOG00000011145(Crhr2),ENSRNOG00000007229(Nr0b2),ENSRNOG00000027942(Eps8l1),ENSRNOG00000010531(Oprd1),ENSRNOG00000004537(Rxrg),ENSRNOG00000031593(Nanos3),ENSRNOG00000002434(Tmem100),ENSRNOG00000053449(Cracr2a),ENSRNOG00000003098(Prom1),ENSRNOG00000014035(Arhgef4),ENSRN…
presynaptic process involved in chemical synaptic transmission	biological_process	1	ENSRNOG00000010365(Syn1)
biological regulation	biological_process	35	ENSRNOG00000033361(Slc39a5),ENSRNOG00000006804(Ppp1r42),ENSRNOG00000046981(Gp1bb),ENSRNOG00000053449(Cracr2a),ENSRNOG00000007229(Nr0b2),ENSRNOG00000010531(Oprd1),ENSRNOG00000001287(Gper1),ENSRNOG00000001313(Gnaz),ENSRNOG00000011145(Crhr2),ENSRNOG00000027430(Ikzf2),ENSRNOG00000038184(Camk2n2),ENSRNOG00000004437(Map2k6),ENSRNOG00000001792(Slc12a8),ENSRNOG00000031773(Cngb1),ENSRNOG00000051179(Vps25)…
negative regulation of biological process	biological_process	7	ENSRNOG00000020247(Cnih2),ENSRNOG00000010531(Oprd1),ENSRNOG00000007229(Nr0b2),ENSRNOG00000031593(Nanos3),ENSRNOG00000038184(Camk2n2),ENSRNOG00000001287(Gper1),ENSRNOG00000011145(Crhr2)
reproduction	biological_process	6	ENSRNOG00000031593(Nanos3),ENSRNOG00000014233(Krt19),ENSRNOG00000017246(Adad1),ENSRNOG00000040301(Galntl5),ENSRNOG00000004437(Map2k6),ENSRNOG00000029591(Pkdrej)
growth	biological_process	1	ENSRNOG00000011145(Crhr2)
multicellular organismal process	biological_process	24	ENSRNOG00000004437(Map2k6),ENSRNOG00000031773(Cngb1),ENSRNOG00000040301(Galntl5),ENSRNOG00000001287(Gper1),ENSRNOG00000011145(Crhr2),ENSRNOG00000017246(Adad1),ENSRNOG00000014233(Krt19),ENSRNOG00000047028(Mmp24),ENSRNOG00000005707(Bfsp1),ENSRNOG00000053893(Opn4),ENSRNOG00000011144(Rho),ENSRNOG00000018853(Slc28a3),ENSRNOG00000014751(Ret),ENSRNOG00000002434(Tmem100),ENSRNOG00000046981(Gp1bb),ENSRNOG…
biological adhesion	biological_process	5	ENSRNOG00000046981(Gp1bb),ENSRNOG00000047028(Mmp24),ENSRNOG00000012222(Cdh16),ENSRNOG00000045811(Cldn5),ENSRNOG00000014751(Ret)
developmental process	biological_process	21	ENSRNOG00000045811(Cldn5),ENSRNOG00000003098(Prom1),ENSRNOG00000033361(Slc39a5),ENSRNOG00000002434(Tmem100),ENSRNOG00000052167(Marveld2),ENSRNOG00000004537(Rxrg),ENSRNOG00000031593(Nanos3),ENSRNOG00000007229(Nr0b2),ENSRNOG00000023440(Phex),ENSRNOG00000001287(Gper1),ENSRNOG00000011145(Crhr2),ENSRNOG00000017246(Adad1),ENSRNOG00000014233(Krt19),ENSRNOG00000031773(Cngb1),ENSRNOG00000040301(Galntl5),E…
rhythmic process	biological_process	2	ENSRNOG00000053893(Opn4),ENSRNOG00000004437(Map2k6)
regulation of biological process	biological_process	31	ENSRNOG00000014035(Arhgef4),ENSRNOG00000003098(Prom1),ENSRNOG00000012215(Baiap2l2),ENSRNOG00000029591(Pkdrej),ENSRNOG00000002434(Tmem100),ENSRNOG00000051383(Srsf12),ENSRNOG00000004537(Rxrg),ENSRNOG00000031593(Nanos3),ENSRNOG00000008526(Pdzd3),ENSRNOG00000027942(Eps8l1),ENSRNOG00000014233(Krt19),ENSRNOG00000002501(Ddx3y),ENSRNOG00000026944(Gpr150),ENSRNOG00000014751(Ret),ENSRNOG00000011144(Rho),EN…
single-organism process	biological_process	49	ENSRNOG00000010531(Oprd1),ENSRNOG00000007229(Nr0b2),ENSRNOG00000033361(Slc39a5),ENSRNOG00000052167(Marveld2),ENSRNOG00000046981(Gp1bb),ENSRNOG00000017773(Crispld1),ENSRNOG00000053893(Opn4),ENSRNOG00000053850(Rdh5),ENSRNOG00000026497(Pigc),ENSRNOG00000018853(Slc28a3),ENSRNOG00000020247(Cnih2),ENSRNOG00000036659(Fn3k),ENSRNOG00000042918(RGD1304770),ENSRNOG00000047028(Mmp24),ENSRNOG00000018927(Sprn)…
response to stimulus	biological_process	25	ENSRNOG00000005850(Gdap1),ENSRNOG00000014233(Krt19),ENSRNOG00000011144(Rho),ENSRNOG00000014751(Ret),ENSRNOG00000026944(Gpr150),ENSRNOG00000002434(Tmem100),ENSRNOG00000029591(Pkdrej),ENSRNOG00000012215(Baiap2l2),ENSRNOG00000014035(Arhgef4),ENSRNOG00000027942(Eps8l1),ENSRNOG00000008526(Pdzd3),ENSRNOG00000031593(Nanos3),ENSRNOG00000004537(Rxrg),ENSRNOG00000031773(Cngb1),ENSRNOG00000004437(Map2k6),EN…
cellular process	biological_process	52	ENSRNOG00000020884(Cd6),ENSRNOG00000005707(Bfsp1),ENSRNOG00000011144(Rho),ENSRNOG00000014751(Ret),ENSRNOG00000000245(Slc16a6),ENSRNOG00000026944(Gpr150),ENSRNOG00000002501(Ddx3y),ENSRNOG00000005850(Gdap1),ENSRNOG00000040301(Galntl5),ENSRNOG00000039568(RGD1308112),ENSRNOG00000012122(Clvs2),ENSRNOG00000010365(Syn1),ENSRNOG00000014233(Krt19),ENSRNOG00000023440(Phex),ENSRNOG00000027942(Eps8l1),ENSRNO…
metabolic process	biological_process	41	ENSRNOG00000004437(Map2k6),ENSRNOG00000051179(Vps25),ENSRNOG00000001313(Gnaz),ENSRNOG00000049740(LOC102553099),ENSRNOG00000001287(Gper1),ENSRNOG00000027430(Ikzf2),ENSRNOG00000011145(Crhr2),ENSRNOG00000038184(Camk2n2),ENSRNOG00000017246(Adad1),ENSRNOG00000020203(Ptpn20),ENSRNOG00000047028(Mmp24),ENSRNOG00000036659(Fn3k),ENSRNOG00000053893(Opn4),ENSRNOG00000053850(Rdh5),ENSRNOG00000026497(Pigc),ENS…
immune system process	biological_process	2	ENSRNOG00000014751(Ret),ENSRNOG00000001287(Gper1)
extracellular region part	cellular_component	10	ENSRNOG00000003098(Prom1),ENSRNOG00000033361(Slc39a5),ENSRNOG00000012222(Cdh16),ENSRNOG00000011260(Cmbl),ENSRNOG00000027942(Eps8l1),ENSRNOG00000001313(Gnaz),ENSRNOG00000014233(Krt19),ENSRNOG00000051179(Vps25),ENSRNOG00000017773(Crispld1),ENSRNOG00000047028(Mmp24)
cell junction	cellular_component	7	ENSRNOG00000008526(Pdzd3),ENSRNOG00000020247(Cnih2),ENSRNOG00000052167(Marveld2),ENSRNOG00000045811(Cldn5),ENSRNOG00000010365(Syn1),ENSRNOG00000011144(Rho),ENSRNOG00000012215(Baiap2l2)
cell	cellular_component	54	ENSRNOG00000020203(Ptpn20),ENSRNOG00000020169(Gimap8),ENSRNOG00000018927(Sprn),ENSRNOG00000047028(Mmp24),ENSRNOG00000020247(Cnih2),ENSRNOG00000053850(Rdh5),ENSRNOG00000053893(Opn4),ENSRNOG00000018853(Slc28a3),ENSRNOG00000026497(Pigc),ENSRNOG00000027542(LOC100302465),ENSRNOG00000004437(Map2k6),ENSRNOG00000031773(Cngb1),ENSRNOG00000001792(Slc12a8),ENSRNOG00000051179(Vps25),ENSRNOG00000001313(Gnaz),…
membrane	cellular_component	47	ENSRNOG00000026497(Pigc),ENSRNOG00000018853(Slc28a3),ENSRNOG00000053893(Opn4),ENSRNOG00000018927(Sprn),ENSRNOG00000047028(Mmp24),ENSRNOG00000022957(Ctxn3),ENSRNOG00000042918(RGD1304770),ENSRNOG00000020247(Cnih2),ENSRNOG00000001544(Cyyr1),ENSRNOG00000013128(Tmem179),ENSRNOG00000011145(Crhr2),ENSRNOG00000001313(Gnaz),ENSRNOG00000001287(Gper1),ENSRNOG00000007591(Slc45a3),ENSRNOG00000031773(Cngb1),EN…
membrane part	cellular_component	43	ENSRNOG00000026497(Pigc),ENSRNOG00000018853(Slc28a3),ENSRNOG00000053893(Opn4),ENSRNOG00000022957(Ctxn3),ENSRNOG00000018927(Sprn),ENSRNOG00000047028(Mmp24),ENSRNOG00000042918(RGD1304770),ENSRNOG00000001544(Cyyr1),ENSRNOG00000020247(Cnih2),ENSRNOG00000011145(Crhr2),ENSRNOG00000013128(Tmem179),ENSRNOG00000001287(Gper1),ENSRNOG00000001313(Gnaz),ENSRNOG00000007591(Slc45a3),ENSRNOG00000001792(Slc12a8),…
synapse part	cellular_component	5	ENSRNOG00000020247(Cnih2),ENSRNOG00000010531(Oprd1),ENSRNOG00000031773(Cngb1),ENSRNOG00000010365(Syn1),ENSRNOG00000011145(Crhr2)
organelle	cellular_component	44	ENSRNOG00000038184(Camk2n2),ENSRNOG00000017246(Adad1),ENSRNOG00000001313(Gnaz),ENSRNOG00000001287(Gper1),ENSRNOG00000027430(Ikzf2),ENSRNOG00000011145(Crhr2),ENSRNOG00000051179(Vps25),ENSRNOG00000031773(Cngb1),ENSRNOG00000027542(LOC100302465),ENSRNOG00000017773(Crispld1),ENSRNOG00000053850(Rdh5),ENSRNOG00000026497(Pigc),ENSRNOG00000020247(Cnih2),ENSRNOG00000020203(Ptpn20),ENSRNOG00000020169(Gimap8…
organelle part	cellular_component	25	ENSRNOG00000005850(Gdap1),ENSRNOG00000031773(Cngb1),ENSRNOG00000051179(Vps25),ENSRNOG00000012122(Clvs2),ENSRNOG00000039568(RGD1308112),ENSRNOG00000001287(Gper1),ENSRNOG00000010365(Syn1),ENSRNOG00000027430(Ikzf2),ENSRNOG00000038184(Camk2n2),ENSRNOG00000014233(Krt19),ENSRNOG00000047028(Mmp24),ENSRNOG00000018927(Sprn),ENSRNOG00000020203(Ptpn20),ENSRNOG00000020169(Gimap8),ENSRNOG00000020247(Cnih2),EN…
supramolecular complex	cellular_component	3	ENSRNOG00000001287(Gper1),ENSRNOG00000020203(Ptpn20),ENSRNOG00000014233(Krt19)
cell part	cellular_component	54	ENSRNOG00000045811(Cldn5),ENSRNOG00000014035(Arhgef4),ENSRNOG00000003098(Prom1),ENSRNOG00000012215(Baiap2l2),ENSRNOG00000029591(Pkdrej),ENSRNOG00000012222(Cdh16),ENSRNOG00000002434(Tmem100),ENSRNOG00000004537(Rxrg),ENSRNOG00000042660(LOC685081),ENSRNOG00000031593(Nanos3),ENSRNOG00000008526(Pdzd3),ENSRNOG00000027942(Eps8l1),ENSRNOG00000023440(Phex),ENSRNOG00000014233(Krt19),ENSRNOG00000010365(Syn1…
extracellular region	cellular_component	10	ENSRNOG00000047028(Mmp24),ENSRNOG00000017773(Crispld1),ENSRNOG00000051179(Vps25),ENSRNOG00000001313(Gnaz),ENSRNOG00000014233(Krt19),ENSRNOG00000027942(Eps8l1),ENSRNOG00000011260(Cmbl),ENSRNOG00000012222(Cdh16),ENSRNOG00000033361(Slc39a5),ENSRNOG00000003098(Prom1)
synapse	cellular_component	5	ENSRNOG00000010531(Oprd1),ENSRNOG00000020247(Cnih2),ENSRNOG00000011145(Crhr2),ENSRNOG00000031773(Cngb1),ENSRNOG00000010365(Syn1)
membrane-enclosed lumen	cellular_component	7	ENSRNOG00000027430(Ikzf2),ENSRNOG00000012215(Baiap2l2),ENSRNOG00000053850(Rdh5),ENSRNOG00000051179(Vps25),ENSRNOG00000018927(Sprn),ENSRNOG00000053449(Cracr2a),ENSRNOG00000020169(Gimap8)
macromolecular complex	cellular_component	12	ENSRNOG00000014751(Ret),ENSRNOG00000031593(Nanos3),ENSRNOG00000026497(Pigc),ENSRNOG00000020247(Cnih2),ENSRNOG00000008526(Pdzd3),ENSRNOG00000007229(Nr0b2),ENSRNOG00000027942(Eps8l1),ENSRNOG00000014233(Krt19),ENSRNOG00000001313(Gnaz),ENSRNOG00000012215(Baiap2l2),ENSRNOG00000002501(Ddx3y),ENSRNOG00000031773(Cngb1)
molecular transducer activity	molecular_function	11	ENSRNOG00000026944(Gpr150),ENSRNOG00000004537(Rxrg),ENSRNOG00000053893(Opn4),ENSRNOG00000014751(Ret),ENSRNOG00000011144(Rho),ENSRNOG00000010531(Oprd1),ENSRNOG00000020884(Cd6),ENSRNOG00000007229(Nr0b2),ENSRNOG00000001287(Gper1),ENSRNOG00000011145(Crhr2),ENSRNOG00000031773(Cngb1)
nucleic acid binding transcription factor activity	molecular_function	2	ENSRNOG00000027430(Ikzf2),ENSRNOG00000004537(Rxrg)
binding	molecular_function	45	ENSRNOG00000004437(Map2k6),ENSRNOG00000031773(Cngb1),ENSRNOG00000051179(Vps25),ENSRNOG00000001313(Gnaz),ENSRNOG00000001287(Gper1),ENSRNOG00000027430(Ikzf2),ENSRNOG00000011145(Crhr2),ENSRNOG00000038184(Camk2n2),ENSRNOG00000017246(Adad1),ENSRNOG00000020169(Gimap8),ENSRNOG00000047028(Mmp24),ENSRNOG00000018927(Sprn),ENSRNOG00000020247(Cnih2),ENSRNOG00000053893(Opn4),ENSRNOG00000006804(Ppp1r42),ENSRNO…
structural molecule activity	molecular_function	3	ENSRNOG00000005707(Bfsp1),ENSRNOG00000045811(Cldn5),ENSRNOG00000014233(Krt19)
catalytic activity	molecular_function	23	ENSRNOG00000055450(Ckmt2),ENSRNOG00000011260(Cmbl),ENSRNOG00000024591(Hs3st3a1),ENSRNOG00000023440(Phex),ENSRNOG00000053850(Rdh5),ENSRNOG00000007069(Adhfe1),ENSRNOG00000026497(Pigc),ENSRNOG00000014751(Ret),ENSRNOG00000036659(Fn3k),ENSRNOG00000020203(Ptpn20),ENSRNOG00000047028(Mmp24),ENSRNOG00000017246(Adad1),ENSRNOG00000014550(Plcxd3),ENSRNOG00000007433(Cyb561),ENSRNOG00000049740(LOC102553099),EN…
transcription factor activity, protein binding	molecular_function	1	ENSRNOG00000007229(Nr0b2)
signal transducer activity	molecular_function	11	ENSRNOG00000001287(Gper1),ENSRNOG00000001313(Gnaz),ENSRNOG00000011145(Crhr2),ENSRNOG00000004437(Map2k6),ENSRNOG00000053893(Opn4),ENSRNOG00000004537(Rxrg),ENSRNOG00000011144(Rho),ENSRNOG00000014751(Ret),ENSRNOG00000026944(Gpr150),ENSRNOG00000007229(Nr0b2),ENSRNOG00000010531(Oprd1)
transporter activity	molecular_function	8	ENSRNOG00000001792(Slc12a8),ENSRNOG00000031773(Cngb1),ENSRNOG00000029591(Pkdrej),ENSRNOG00000012122(Clvs2),ENSRNOG00000033361(Slc39a5),ENSRNOG00000018853(Slc28a3),ENSRNOG00000042660(LOC685081),ENSRNOG00000000245(Slc16a6)
molecular function regulator	molecular_function	4	ENSRNOG00000038184(Camk2n2),ENSRNOG00000014035(Arhgef4),ENSRNOG00000027942(Eps8l1),ENSRNOG00000008526(Pdzd3)

## Sheet: S2-H vs S2-N
2H-2N
Up
Term	GO_namespace	Number of DEGs	Genes
biological adhesion	biological_process	1	ENSRNOG00000038835(Cd86)
signaling	biological_process	12	ENSRNOG00000010047(Ddit4l2),ENSRNOG00000020990(Fgf21),ENSRNOG00000014964(Hp),ENSRNOG00000013547(Slc6a12),ENSRNOG00000017597(Fbp1),ENSRNOG00000038835(Cd86),ENSRNOG00000011726(Grin1),ENSRNOG00000009522(Adra1a),ENSRNOG00000046972(Chrm2),ENSRNOG00000049410(Chrm3),ENSRNOG00000037456(P2rx2),ENSRNOG00000018355(Msx2)
single-organism process	biological_process	27	ENSRNOG00000049410(Chrm3),ENSRNOG00000006873(Dnase1),ENSRNOG00000002802(Cxcl1),ENSRNOG00000020669(Ovol1),ENSRNOG00000002460(Serpinb2),ENSRNOG00000009522(Adra1a),ENSRNOG00000010406(Cel),ENSRNOG00000021053(Lsr),ENSRNOG00000014964(Hp),ENSRNOG00000017597(Fbp1),ENSRNOG00000011227(Atp1b2),ENSRNOG00000053430(Slco4a1),ENSRNOG00000020136(Tgm1),ENSRNOG00000028261(Tppp),ENSRNOG00000020614(Phlda2),ENSRNOG000…
response to stimulus	biological_process	16	ENSRNOG00000002802(Cxcl1),ENSRNOG00000038835(Cd86),ENSRNOG00000011726(Grin1),ENSRNOG00000002460(Serpinb2),ENSRNOG00000009522(Adra1a),ENSRNOG00000046972(Chrm2),ENSRNOG00000049410(Chrm3),ENSRNOG00000037456(P2rx2),ENSRNOG00000018355(Msx2),ENSRNOG00000010047(Ddit4l2),ENSRNOG00000020990(Fgf21),ENSRNOG00000012811(Spint1),ENSRNOG00000014964(Hp),ENSRNOG00000051171(G6pc),ENSRNOG00000013547(Slc6a12),ENSRNO…
negative regulation of biological process	biological_process	12	ENSRNOG00000009522(Adra1a),ENSRNOG00000012811(Spint1),ENSRNOG00000011533(Irx3),ENSRNOG00000020669(Ovol1),ENSRNOG00000010047(Ddit4l2),ENSRNOG00000038835(Cd86),ENSRNOG00000011726(Grin1),ENSRNOG00000002460(Serpinb2),ENSRNOG00000020990(Fgf21),ENSRNOG00000018355(Msx2),ENSRNOG00000017597(Fbp1),ENSRNOG00000004399(Dlx4)
positive regulation of biological process	biological_process	14	ENSRNOG00000038835(Cd86),ENSRNOG00000011227(Atp1b2),ENSRNOG00000002802(Cxcl1),ENSRNOG00000020669(Ovol1),ENSRNOG00000011533(Irx3),ENSRNOG00000020990(Fgf21),ENSRNOG00000011726(Grin1),ENSRNOG00000009522(Adra1a),ENSRNOG00000012811(Spint1),ENSRNOG00000049410(Chrm3),ENSRNOG00000028261(Tppp),ENSRNOG00000050675(Myl4),ENSRNOG00000022391(Zfp711),ENSRNOG00000018355(Msx2)
locomotion	biological_process	3	ENSRNOG00000018355(Msx2),ENSRNOG00000002802(Cxcl1),ENSRNOG00000020614(Phlda2)
biological phase	biological_process	1	ENSRNOG00000018355(Msx2)
metabolic process	biological_process	26	ENSRNOG00000051171(G6pc),ENSRNOG00000014964(Hp),ENSRNOG00000050675(Myl4),ENSRNOG00000049351(Nat8l),ENSRNOG00000036588(LOC682512),ENSRNOG00000003950(Lvrn),ENSRNOG00000022391(Zfp711),ENSRNOG00000017597(Fbp1),ENSRNOG00000011227(Atp1b2),ENSRNOG00000020990(Fgf21),ENSRNOG00000053430(Slco4a1),ENSRNOG00000060348(Zdhhc23),ENSRNOG00000012811(Spint1),ENSRNOG00000004399(Dlx4),ENSRNOG00000020136(Tgm1),ENSRNOG…
multi-organism process	biological_process	5	ENSRNOG00000046972(Chrm2),ENSRNOG00000011726(Grin1),ENSRNOG00000038835(Cd86),ENSRNOG00000020669(Ovol1),ENSRNOG00000002802(Cxcl1)
cell killing	biological_process	1	ENSRNOG00000002802(Cxcl1)
immune system process	biological_process	2	ENSRNOG00000002802(Cxcl1),ENSRNOG00000038835(Cd86)
multicellular organismal process	biological_process	16	ENSRNOG00000018355(Msx2),ENSRNOG00000020614(Phlda2),ENSRNOG00000037456(P2rx2),ENSRNOG00000049410(Chrm3),ENSRNOG00000020136(Tgm1),ENSRNOG00000046972(Chrm2),ENSRNOG00000021053(Lsr),ENSRNOG00000009522(Adra1a),ENSRNOG00000011726(Grin1),ENSRNOG00000002802(Cxcl1),ENSRNOG00000011533(Irx3),ENSRNOG00000020669(Ovol1),ENSRNOG00000038835(Cd86),ENSRNOG00000050675(Myl4),ENSRNOG00000051171(G6pc),ENSRNOG00000012…
developmental process	biological_process	13	ENSRNOG00000051171(G6pc),ENSRNOG00000012811(Spint1),ENSRNOG00000018355(Msx2),ENSRNOG00000020136(Tgm1),ENSRNOG00000020614(Phlda2),ENSRNOG00000037456(P2rx2),ENSRNOG00000009522(Adra1a),ENSRNOG00000021053(Lsr),ENSRNOG00000038835(Cd86),ENSRNOG00000002802(Cxcl1),ENSRNOG00000011533(Irx3),ENSRNOG00000020669(Ovol1),ENSRNOG00000011726(Grin1)
regulation of biological process	biological_process	24	ENSRNOG00000012811(Spint1),ENSRNOG00000010047(Ddit4l2),ENSRNOG00000011227(Atp1b2),ENSRNOG00000020990(Fgf21),ENSRNOG00000022391(Zfp711),ENSRNOG00000017597(Fbp1),ENSRNOG00000014964(Hp),ENSRNOG00000050675(Myl4),ENSRNOG00000051171(G6pc),ENSRNOG00000009522(Adra1a),ENSRNOG00000046972(Chrm2),ENSRNOG00000021053(Lsr),ENSRNOG00000020669(Ovol1),ENSRNOG00000011533(Irx3),ENSRNOG00000002802(Cxcl1),ENSRNOG00000…
growth	biological_process	4	ENSRNOG00000051171(G6pc),ENSRNOG00000017597(Fbp1),ENSRNOG00000018355(Msx2),ENSRNOG00000009522(Adra1a)
rhythmic process	biological_process	1	ENSRNOG00000011726(Grin1)
localization	biological_process	13	ENSRNOG00000009522(Adra1a),ENSRNOG00000011726(Grin1),ENSRNOG00000002802(Cxcl1),ENSRNOG00000018355(Msx2),ENSRNOG00000037456(P2rx2),ENSRNOG00000020614(Phlda2),ENSRNOG00000049410(Chrm3),ENSRNOG00000060348(Zdhhc23),ENSRNOG00000020990(Fgf21),ENSRNOG00000053430(Slco4a1),ENSRNOG00000011227(Atp1b2),ENSRNOG00000013547(Slc6a12),ENSRNOG00000051171(G6pc)
reproduction	biological_process	5	ENSRNOG00000018355(Msx2),ENSRNOG00000020669(Ovol1),ENSRNOG00000020614(Phlda2),ENSRNOG00000011726(Grin1),ENSRNOG00000012811(Spint1)
biological regulation	biological_process	27	ENSRNOG00000046972(Chrm2),ENSRNOG00000021053(Lsr),ENSRNOG00000010406(Cel),ENSRNOG00000009522(Adra1a),ENSRNOG00000011726(Grin1),ENSRNOG00000002460(Serpinb2),ENSRNOG00000020669(Ovol1),ENSRNOG00000011533(Irx3),ENSRNOG00000002802(Cxcl1),ENSRNOG00000038835(Cd86),ENSRNOG00000018355(Msx2),ENSRNOG00000037456(P2rx2),ENSRNOG00000020614(Phlda2),ENSRNOG00000004399(Dlx4),ENSRNOG00000028261(Tppp),ENSRNOG000000…
behavior	biological_process	2	ENSRNOG00000011726(Grin1),ENSRNOG00000037456(P2rx2)
cellular process	biological_process	31	ENSRNOG00000012811(Spint1),ENSRNOG00000060348(Zdhhc23),ENSRNOG00000020990(Fgf21),ENSRNOG00000010047(Ddit4l2),ENSRNOG00000036588(LOC682512),ENSRNOG00000022391(Zfp711),ENSRNOG00000003950(Lvrn),ENSRNOG00000013547(Slc6a12),ENSRNOG00000051171(G6pc),ENSRNOG00000046972(Chrm2),ENSRNOG00000011726(Grin1),ENSRNOG00000038835(Cd86),ENSRNOG00000011533(Irx3),ENSRNOG00000018355(Msx2),ENSRNOG00000020614(Phlda2),E…
cellular component organization or biogenesis	biological_process	9	ENSRNOG00000011726(Grin1),ENSRNOG00000060348(Zdhhc23),ENSRNOG00000012811(Spint1),ENSRNOG00000028261(Tppp),ENSRNOG00000037456(P2rx2),ENSRNOG00000013547(Slc6a12),ENSRNOG00000010883(Pard6b),ENSRNOG00000018355(Msx2),ENSRNOG00000017597(Fbp1)
reproductive process	biological_process	5	ENSRNOG00000012811(Spint1),ENSRNOG00000011726(Grin1),ENSRNOG00000020614(Phlda2),ENSRNOG00000018355(Msx2),ENSRNOG00000020669(Ovol1)
membrane	cellular_component	22	ENSRNOG00000011227(Atp1b2),ENSRNOG00000014164(Paqr5),ENSRNOG00000053430(Slco4a1),ENSRNOG00000060348(Zdhhc23),ENSRNOG00000012811(Spint1),ENSRNOG00000051171(G6pc),ENSRNOG00000013547(Slc6a12),ENSRNOG00000054136(Xkrx),ENSRNOG00000049351(Nat8l),ENSRNOG00000028189(LOC691215),ENSRNOG00000038835(Cd86),ENSRNOG00000011726(Grin1),ENSRNOG00000056332(Fam73a),ENSRNOG00000010406(Cel),ENSRNOG00000009522(Adra1a),…
cell	cellular_component	30	ENSRNOG00000017597(Fbp1),ENSRNOG00000049351(Nat8l),ENSRNOG00000053430(Slco4a1),ENSRNOG00000011227(Atp1b2),ENSRNOG00000006873(Dnase1),ENSRNOG00000049410(Chrm3),ENSRNOG00000004399(Dlx4),ENSRNOG00000009738(LOC361108),ENSRNOG00000021053(Lsr),ENSRNOG00000009522(Adra1a),ENSRNOG00000010406(Cel),ENSRNOG00000002460(Serpinb2),ENSRNOG00000020669(Ovol1),ENSRNOG00000003950(Lvrn),ENSRNOG00000022391(Zfp711),ENS…
supramolecular complex	cellular_component	3	ENSRNOG00000009522(Adra1a),ENSRNOG00000028261(Tppp),ENSRNOG00000050675(Myl4)
synapse part	cellular_component	4	ENSRNOG00000011726(Grin1),ENSRNOG00000037456(P2rx2),ENSRNOG00000049410(Chrm3),ENSRNOG00000046972(Chrm2)
cell part	cellular_component	30	ENSRNOG00000009522(Adra1a),ENSRNOG00000010406(Cel),ENSRNOG00000009738(LOC361108),ENSRNOG00000021053(Lsr),ENSRNOG00000020669(Ovol1),ENSRNOG00000002460(Serpinb2),ENSRNOG00000006873(Dnase1),ENSRNOG00000049410(Chrm3),ENSRNOG00000004399(Dlx4),ENSRNOG00000011227(Atp1b2),ENSRNOG00000053430(Slco4a1),ENSRNOG00000049351(Nat8l),ENSRNOG00000017597(Fbp1),ENSRNOG00000046972(Chrm2),ENSRNOG00000011533(Irx3),ENSR…
membrane part	cellular_component	22	ENSRNOG00000012811(Spint1),ENSRNOG00000060348(Zdhhc23),ENSRNOG00000014164(Paqr5),ENSRNOG00000053430(Slco4a1),ENSRNOG00000011227(Atp1b2),ENSRNOG00000028189(LOC691215),ENSRNOG00000049351(Nat8l),ENSRNOG00000013547(Slc6a12),ENSRNOG00000051171(G6pc),ENSRNOG00000054136(Xkrx),ENSRNOG00000021053(Lsr),ENSRNOG00000046972(Chrm2),ENSRNOG00000056332(Fam73a),ENSRNOG00000010406(Cel),ENSRNOG00000009522(Adra1a),E…
membrane-enclosed lumen	cellular_component	2	ENSRNOG00000009738(LOC361108),ENSRNOG00000022391(Zfp711)
extracellular region part	cellular_component	13	ENSRNOG00000010883(Pard6b),ENSRNOG00000058653(Tmem52b),ENSRNOG00000020136(Tgm1),ENSRNOG00000017597(Fbp1),ENSRNOG00000006873(Dnase1),ENSRNOG00000022391(Zfp711),ENSRNOG00000020990(Fgf21),ENSRNOG00000002460(Serpinb2),ENSRNOG00000038835(Cd86),ENSRNOG00000002802(Cxcl1),ENSRNOG00000021053(Lsr),ENSRNOG00000012811(Spint1),ENSRNOG00000010406(Cel)
extracellular region	cellular_component	15	ENSRNOG00000006873(Dnase1),ENSRNOG00000017597(Fbp1),ENSRNOG00000022391(Zfp711),ENSRNOG00000014964(Hp),ENSRNOG00000058653(Tmem52b),ENSRNOG00000010883(Pard6b),ENSRNOG00000020136(Tgm1),ENSRNOG00000012811(Spint1),ENSRNOG00000021053(Lsr),ENSRNOG00000010406(Cel),ENSRNOG00000011726(Grin1),ENSRNOG00000002460(Serpinb2),ENSRNOG00000020990(Fgf21),ENSRNOG00000002802(Cxcl1),ENSRNOG00000038835(Cd86)
organelle part	cellular_component	9	ENSRNOG00000022391(Zfp711),ENSRNOG00000049351(Nat8l),ENSRNOG00000006873(Dnase1),ENSRNOG00000028261(Tppp),ENSRNOG00000050675(Myl4),ENSRNOG00000051171(G6pc),ENSRNOG00000037456(P2rx2),ENSRNOG00000009522(Adra1a),ENSRNOG00000009738(LOC361108)
macromolecular complex	cellular_component	7	ENSRNOG00000021053(Lsr),ENSRNOG00000010406(Cel),ENSRNOG00000011726(Grin1),ENSRNOG00000011227(Atp1b2),ENSRNOG00000036588(LOC682512),ENSRNOG00000037456(P2rx2),ENSRNOG00000010883(Pard6b)
organelle	cellular_component	24	ENSRNOG00000020136(Tgm1),ENSRNOG00000004399(Dlx4),ENSRNOG00000028261(Tppp),ENSRNOG00000058653(Tmem52b),ENSRNOG00000010883(Pard6b),ENSRNOG00000037456(P2rx2),ENSRNOG00000018355(Msx2),ENSRNOG00000006873(Dnase1),ENSRNOG00000011533(Irx3),ENSRNOG00000020669(Ovol1),ENSRNOG00000038835(Cd86),ENSRNOG00000011726(Grin1),ENSRNOG00000010406(Cel),ENSRNOG00000009522(Adra1a),ENSRNOG00000021053(Lsr),ENSRNOG0000000…
cell junction	cellular_component	4	ENSRNOG00000046972(Chrm2),ENSRNOG00000049410(Chrm3),ENSRNOG00000011726(Grin1),ENSRNOG00000010883(Pard6b)
synapse	cellular_component	4	ENSRNOG00000037456(P2rx2),ENSRNOG00000011726(Grin1),ENSRNOG00000049410(Chrm3),ENSRNOG00000046972(Chrm2)
signal transducer activity	molecular_function	5	ENSRNOG00000011726(Grin1),ENSRNOG00000037456(P2rx2),ENSRNOG00000049410(Chrm3),ENSRNOG00000046972(Chrm2),ENSRNOG00000009522(Adra1a)
molecular transducer activity	molecular_function	6	ENSRNOG00000049410(Chrm3),ENSRNOG00000014164(Paqr5),ENSRNOG00000037456(P2rx2),ENSRNOG00000011726(Grin1),ENSRNOG00000009522(Adra1a),ENSRNOG00000046972(Chrm2)
structural molecule activity	molecular_function	1	ENSRNOG00000036588(LOC682512)
nucleic acid binding transcription factor activity	molecular_function	4	ENSRNOG00000004399(Dlx4),ENSRNOG00000022391(Zfp711),ENSRNOG00000020669(Ovol1),ENSRNOG00000018355(Msx2)
transporter activity	molecular_function	5	ENSRNOG00000037456(P2rx2),ENSRNOG00000013547(Slc6a12),ENSRNOG00000011726(Grin1),ENSRNOG00000053430(Slco4a1),ENSRNOG00000011227(Atp1b2)
molecular function regulator	molecular_function	3	ENSRNOG00000012811(Spint1),ENSRNOG00000002460(Serpinb2),ENSRNOG00000011227(Atp1b2)
transcription factor activity, protein binding	molecular_function	1	ENSRNOG00000018355(Msx2)
binding	molecular_function	29	ENSRNOG00000002802(Cxcl1),ENSRNOG00000020669(Ovol1),ENSRNOG00000009738(LOC361108),ENSRNOG00000021053(Lsr),ENSRNOG00000009522(Adra1a),ENSRNOG00000010406(Cel),ENSRNOG00000049410(Chrm3),ENSRNOG00000004399(Dlx4),ENSRNOG00000006873(Dnase1),ENSRNOG00000011227(Atp1b2),ENSRNOG00000014964(Hp),ENSRNOG00000017597(Fbp1),ENSRNOG00000011726(Grin1),ENSRNOG00000038835(Cd86),ENSRNOG00000011533(Irx3),ENSRNOG000000…
catalytic activity	molecular_function	10	ENSRNOG00000003950(Lvrn),ENSRNOG00000049351(Nat8l),ENSRNOG00000006873(Dnase1),ENSRNOG00000017597(Fbp1),ENSRNOG00000020136(Tgm1),ENSRNOG00000014964(Hp),ENSRNOG00000051171(G6pc),ENSRNOG00000010406(Cel),ENSRNOG00000060348(Zdhhc23),ENSRNOG00000011227(Atp1b2)
Term	GO_namespace	Number of DEGs	Genes
biological adhesion	biological_process	5	ENSRNOG00000009191(Ccm2l),ENSRNOG00000030515(Nfasc),ENSRNOG00000014963(Adgrg1),ENSRNOG00000019779(Disc1),ENSRNOG00000011994(Perp)
signaling	biological_process	22	ENSRNOG00000003952(Map3k19),ENSRNOG00000008609(Capn3),ENSRNOG00000019789(Tssk4),ENSRNOG00000010531(Oprd1),ENSRNOG00000014850(Amhr2),ENSRNOG00000047450(Lmo3),ENSRNOG00000015554(Ankdd1a),ENSRNOG00000018949(Dlk2),ENSRNOG00000020650(Slc17a7),ENSRNOG00000002978(Faslg),ENSRNOG00000011994(Perp),ENSRNOG00000010447(Tmod2),ENSRNOG00000059227(Akap3),ENSRNOG00000018378(Cacnb2),ENSRNOG00000003476(Slc6a4),ENSR…
presynaptic process involved in chemical synaptic transmission	biological_process	1	ENSRNOG00000010365(Syn1)
single-organism process	biological_process	41	ENSRNOG00000005707(Bfsp1),ENSRNOG00000000245(Slc16a6),ENSRNOG00000030515(Nfasc),ENSRNOG00000059469(Otx1),ENSRNOG00000014963(Adgrg1),ENSRNOG00000020650(Slc17a7),ENSRNOG00000016717(Gas2),ENSRNOG00000010447(Tmod2),ENSRNOG00000022146(Hist1h2af),ENSRNOG00000024201(Fer1l5),ENSRNOG00000003952(Map3k19),ENSRNOG00000028889(Slc51b),ENSRNOG00000019789(Tssk4),ENSRNOG00000019607(Bglap),ENSRNOG00000015554(Ankdd…
response to stimulus	biological_process	24	ENSRNOG00000019779(Disc1),ENSRNOG00000014963(Adgrg1),ENSRNOG00000011646(Rem2),ENSRNOG00000061639(RT1-CE6),ENSRNOG00000018681(LOC100910255),ENSRNOG00000030515(Nfasc),ENSRNOG00000003681(Lct),ENSRNOG00000003952(Map3k19),ENSRNOG00000008609(Capn3),ENSRNOG00000019607(Bglap),ENSRNOG00000010531(Oprd1),ENSRNOG00000009191(Ccm2l),ENSRNOG00000019789(Tssk4),ENSRNOG00000015554(Ankdd1a),ENSRNOG00000047450(Lmo3)…
negative regulation of biological process	biological_process	15	ENSRNOG00000014850(Amhr2),ENSRNOG00000047450(Lmo3),ENSRNOG00000014963(Adgrg1),ENSRNOG00000039593(Ecscr),ENSRNOG00000018949(Dlk2),ENSRNOG00000022893(Rimbp2),ENSRNOG00000008609(Capn3),ENSRNOG00000009191(Ccm2l),ENSRNOG00000010531(Oprd1),ENSRNOG00000013586(Snai3),ENSRNOG00000003476(Slc6a4),ENSRNOG00000016717(Gas2),ENSRNOG00000002978(Faslg),ENSRNOG00000010447(Tmod2),ENSRNOG00000022146(Hist1h2af)
positive regulation of biological process	biological_process	17	ENSRNOG00000003952(Map3k19),ENSRNOG00000028889(Slc51b),ENSRNOG00000019779(Disc1),ENSRNOG00000010531(Oprd1),ENSRNOG00000019789(Tssk4),ENSRNOG00000009191(Ccm2l),ENSRNOG00000008609(Capn3),ENSRNOG00000023551(Sp6),ENSRNOG00000059469(Otx1),ENSRNOG00000014963(Adgrg1),ENSRNOG00000047450(Lmo3),ENSRNOG00000002978(Faslg),ENSRNOG00000011994(Perp),ENSRNOG00000010447(Tmod2),ENSRNOG00000018378(Cacnb2),ENSRNOG00…
locomotion	biological_process	4	ENSRNOG00000014963(Adgrg1),ENSRNOG00000019779(Disc1),ENSRNOG00000030515(Nfasc),ENSRNOG00000031162(Ccl24)
metabolic process	biological_process	28	ENSRNOG00000011994(Perp),ENSRNOG00000002978(Faslg),ENSRNOG00000049403(AABR07020847.1),ENSRNOG00000022146(Hist1h2af),ENSRNOG00000049740(LOC102553099),ENSRNOG00000059227(Akap3),ENSRNOG00000003476(Slc6a4),ENSRNOG00000031162(Ccl24),ENSRNOG00000000257(Smpd3),ENSRNOG00000053075(B4galnt4),ENSRNOG00000050205(Afmid),ENSRNOG00000003952(Map3k19),ENSRNOG00000028889(Slc51b),ENSRNOG00000022893(Rimbp2),ENSRNOG0…
multi-organism process	biological_process	2	ENSRNOG00000003476(Slc6a4),ENSRNOG00000002978(Faslg)
immune system process	biological_process	5	ENSRNOG00000002978(Faslg),ENSRNOG00000010447(Tmod2),ENSRNOG00000031162(Ccl24),ENSRNOG00000000257(Smpd3),ENSRNOG00000061639(RT1-CE6)
multicellular organismal process	biological_process	22	ENSRNOG00000030515(Nfasc),ENSRNOG00000018681(LOC100910255),ENSRNOG00000005707(Bfsp1),ENSRNOG00000014963(Adgrg1),ENSRNOG00000023551(Sp6),ENSRNOG00000059469(Otx1),ENSRNOG00000019779(Disc1),ENSRNOG00000031162(Ccl24),ENSRNOG00000000257(Smpd3),ENSRNOG00000003476(Slc6a4),ENSRNOG00000018378(Cacnb2),ENSRNOG00000010447(Tmod2),ENSRNOG00000056955(Ccdc64),ENSRNOG00000020650(Slc17a7),ENSRNOG00000002978(Faslg)…
developmental process	biological_process	24	ENSRNOG00000024201(Fer1l5),ENSRNOG00000031162(Ccl24),ENSRNOG00000000257(Smpd3),ENSRNOG00000003476(Slc6a4),ENSRNOG00000011994(Perp),ENSRNOG00000002978(Faslg),ENSRNOG00000020650(Slc17a7),ENSRNOG00000010447(Tmod2),ENSRNOG00000056955(Ccdc64),ENSRNOG00000039593(Ecscr),ENSRNOG00000047450(Lmo3),ENSRNOG00000014850(Amhr2),ENSRNOG00000018949(Dlk2),ENSRNOG00000009191(Ccm2l),ENSRNOG00000008609(Capn3),ENSRNOG…
regulation of biological process	biological_process	30	ENSRNOG00000014850(Amhr2),ENSRNOG00000015554(Ankdd1a),ENSRNOG00000047450(Lmo3),ENSRNOG00000039593(Ecscr),ENSRNOG00000009897(Clcnkb),ENSRNOG00000018949(Dlk2),ENSRNOG00000022893(Rimbp2),ENSRNOG00000003952(Map3k19),ENSRNOG00000028889(Slc51b),ENSRNOG00000019607(Bglap),ENSRNOG00000008609(Capn3),ENSRNOG00000019789(Tssk4),ENSRNOG00000009191(Ccm2l),ENSRNOG00000010531(Oprd1),ENSRNOG00000059227(Akap3),ENSR…
growth	biological_process	4	ENSRNOG00000009191(Ccm2l),ENSRNOG00000008609(Capn3),ENSRNOG00000019779(Disc1),ENSRNOG00000003476(Slc6a4)
rhythmic process	biological_process	1	ENSRNOG00000003476(Slc6a4)
localization	biological_process	19	ENSRNOG00000014963(Adgrg1),ENSRNOG00000010365(Syn1),ENSRNOG00000019779(Disc1),ENSRNOG00000000245(Slc16a6),ENSRNOG00000030515(Nfasc),ENSRNOG00000034089(Ttc21a),ENSRNOG00000050015(LOC100910772),ENSRNOG00000009897(Clcnkb),ENSRNOG00000039656(Abca17),ENSRNOG00000010531(Oprd1),ENSRNOG00000008609(Capn3),ENSRNOG00000028889(Slc51b),ENSRNOG00000003476(Slc6a4),ENSRNOG00000031162(Ccl24),ENSRNOG00000000257(Sm…
reproduction	biological_process	2	ENSRNOG00000014850(Amhr2),ENSRNOG00000003476(Slc6a4)
biological regulation	biological_process	32	ENSRNOG00000011646(Rem2),ENSRNOG00000010365(Syn1),ENSRNOG00000014963(Adgrg1),ENSRNOG00000023551(Sp6),ENSRNOG00000059469(Otx1),ENSRNOG00000019779(Disc1),ENSRNOG00000013586(Snai3),ENSRNOG00000009897(Clcnkb),ENSRNOG00000018949(Dlk2),ENSRNOG00000014850(Amhr2),ENSRNOG00000047450(Lmo3),ENSRNOG00000015554(Ankdd1a),ENSRNOG00000039593(Ecscr),ENSRNOG00000019607(Bglap),ENSRNOG00000008609(Capn3),ENSRNOG00000…
behavior	biological_process	4	ENSRNOG00000010447(Tmod2),ENSRNOG00000010531(Oprd1),ENSRNOG00000003476(Slc6a4),ENSRNOG00000020650(Slc17a7)
cellular process	biological_process	43	ENSRNOG00000018949(Dlk2),ENSRNOG00000039656(Abca17),ENSRNOG00000009191(Ccm2l),ENSRNOG00000010531(Oprd1),ENSRNOG00000008609(Capn3),ENSRNOG00000003476(Slc6a4),ENSRNOG00000000257(Smpd3),ENSRNOG00000031162(Ccl24),ENSRNOG00000050205(Afmid),ENSRNOG00000059227(Akap3),ENSRNOG00000018378(Cacnb2),ENSRNOG00000056955(Ccdc64),ENSRNOG00000049403(AABR07020847.1),ENSRNOG00000011994(Perp),ENSRNOG00000002978(Faslg…
cellular component organization or biogenesis	biological_process	15	ENSRNOG00000019779(Disc1),ENSRNOG00000028889(Slc51b),ENSRNOG00000010531(Oprd1),ENSRNOG00000008609(Capn3),ENSRNOG00000011994(Perp),ENSRNOG00000002978(Faslg),ENSRNOG00000020650(Slc17a7),ENSRNOG00000056955(Ccdc64),ENSRNOG00000010447(Tmod2),ENSRNOG00000022146(Hist1h2af),ENSRNOG00000018378(Cacnb2),ENSRNOG00000003476(Slc6a4),ENSRNOG00000031162(Ccl24),ENSRNOG00000034089(Ttc21a),ENSRNOG00000030515(Nfasc)
reproductive process	biological_process	2	ENSRNOG00000003476(Slc6a4),ENSRNOG00000014850(Amhr2)
membrane	cellular_component	34	ENSRNOG00000028889(Slc51b),ENSRNOG00000010531(Oprd1),ENSRNOG00000008609(Capn3),ENSRNOG00000014218(Tmem25),ENSRNOG00000039656(Abca17),ENSRNOG00000039593(Ecscr),ENSRNOG00000014850(Amhr2),ENSRNOG00000018949(Dlk2),ENSRNOG00000009897(Clcnkb),ENSRNOG00000002978(Faslg),ENSRNOG00000011994(Perp),ENSRNOG00000020650(Slc17a7),ENSRNOG00000027480(Tmem116),ENSRNOG00000049403(AABR07020847.1),ENSRNOG00000025670(S…
cell	cellular_component	42	ENSRNOG00000022146(Hist1h2af),ENSRNOG00000010447(Tmod2),ENSRNOG00000020650(Slc17a7),ENSRNOG00000047450(Lmo3),ENSRNOG00000014850(Amhr2),ENSRNOG00000019789(Tssk4),ENSRNOG00000019607(Bglap),ENSRNOG00000028889(Slc51b),ENSRNOG00000003952(Map3k19),ENSRNOG00000037710(Calr4),ENSRNOG00000003681(Lct),ENSRNOG00000030515(Nfasc),ENSRNOG00000013586(Snai3),ENSRNOG00000061639(RT1-CE6),ENSRNOG00000005707(Bfsp1),E…
supramolecular complex	cellular_component	3	ENSRNOG00000018681(LOC100910255),ENSRNOG00000019779(Disc1),ENSRNOG00000010447(Tmod2)
synapse part	cellular_component	4	ENSRNOG00000010531(Oprd1),ENSRNOG00000020650(Slc17a7),ENSRNOG00000019779(Disc1),ENSRNOG00000010365(Syn1)
cell part	cellular_component	42	ENSRNOG00000008356(Myo5c),ENSRNOG00000014963(Adgrg1),ENSRNOG00000059469(Otx1),ENSRNOG00000006503(Frmd3),ENSRNOG00000013586(Snai3),ENSRNOG00000030515(Nfasc),ENSRNOG00000003681(Lct),ENSRNOG00000037710(Calr4),ENSRNOG00000005707(Bfsp1),ENSRNOG00000061639(RT1-CE6),ENSRNOG00000047450(Lmo3),ENSRNOG00000014850(Amhr2),ENSRNOG00000003952(Map3k19),ENSRNOG00000028889(Slc51b),ENSRNOG00000019607(Bglap),ENSRNOG…
membrane part	cellular_component	28	ENSRNOG00000018949(Dlk2),ENSRNOG00000009897(Clcnkb),ENSRNOG00000039593(Ecscr),ENSRNOG00000039656(Abca17),ENSRNOG00000014850(Amhr2),ENSRNOG00000010531(Oprd1),ENSRNOG00000014218(Tmem25),ENSRNOG00000028889(Slc51b),ENSRNOG00000003476(Slc6a4),ENSRNOG00000000257(Smpd3),ENSRNOG00000025670(Shisa3),ENSRNOG00000024201(Fer1l5),ENSRNOG00000018378(Cacnb2),ENSRNOG00000027480(Tmem116),ENSRNOG00000049403(AABR070…
membrane-enclosed lumen	cellular_component	3	ENSRNOG00000022845(Cep70),ENSRNOG00000022146(Hist1h2af),ENSRNOG00000002978(Faslg)
extracellular region part	cellular_component	7	ENSRNOG00000002978(Faslg),ENSRNOG00000031162(Ccl24),ENSRNOG00000030515(Nfasc),ENSRNOG00000019607(Bglap),ENSRNOG00000018949(Dlk2),ENSRNOG00000008356(Myo5c),ENSRNOG00000014963(Adgrg1)
extracellular region	cellular_component	7	ENSRNOG00000030515(Nfasc),ENSRNOG00000031162(Ccl24),ENSRNOG00000002978(Faslg),ENSRNOG00000018949(Dlk2),ENSRNOG00000014963(Adgrg1),ENSRNOG00000008356(Myo5c),ENSRNOG00000019607(Bglap)
organelle part	cellular_component	16	ENSRNOG00000059227(Akap3),ENSRNOG00000018681(LOC100910255),ENSRNOG00000053075(B4galnt4),ENSRNOG00000003476(Slc6a4),ENSRNOG00000000257(Smpd3),ENSRNOG00000020650(Slc17a7),ENSRNOG00000002978(Faslg),ENSRNOG00000050015(LOC100910772),ENSRNOG00000056955(Ccdc64),ENSRNOG00000022146(Hist1h2af),ENSRNOG00000010447(Tmod2),ENSRNOG00000010365(Syn1),ENSRNOG00000022704(Esyt3),ENSRNOG00000008356(Myo5c),ENSRNOG0000…
macromolecular complex	cellular_component	9	ENSRNOG00000008356(Myo5c),ENSRNOG00000008609(Capn3),ENSRNOG00000028889(Slc51b),ENSRNOG00000019779(Disc1),ENSRNOG00000034089(Ttc21a),ENSRNOG00000013586(Snai3),ENSRNOG00000018378(Cacnb2),ENSRNOG00000061639(RT1-CE6),ENSRNOG00000022146(Hist1h2af)
organelle	cellular_component	32	ENSRNOG00000005707(Bfsp1),ENSRNOG00000050015(LOC100910772),ENSRNOG00000013586(Snai3),ENSRNOG00000018681(LOC100910255),ENSRNOG00000030515(Nfasc),ENSRNOG00000034089(Ttc21a),ENSRNOG00000037710(Calr4),ENSRNOG00000019779(Disc1),ENSRNOG00000023551(Sp6),ENSRNOG00000059469(Otx1),ENSRNOG00000006503(Frmd3),ENSRNOG00000022845(Cep70),ENSRNOG00000010365(Syn1),ENSRNOG00000014963(Adgrg1),ENSRNOG00000022704(Esyt…
cell junction	cellular_component	5	ENSRNOG00000010365(Syn1),ENSRNOG00000030515(Nfasc),ENSRNOG00000020650(Slc17a7),ENSRNOG00000011994(Perp),ENSRNOG00000019779(Disc1)
synapse	cellular_component	4	ENSRNOG00000010531(Oprd1),ENSRNOG00000019779(Disc1),ENSRNOG00000020650(Slc17a7),ENSRNOG00000010365(Syn1)
signal transducer activity	molecular_function	5	ENSRNOG00000010531(Oprd1),ENSRNOG00000020650(Slc17a7),ENSRNOG00000003952(Map3k19),ENSRNOG00000014850(Amhr2),ENSRNOG00000014963(Adgrg1)
molecular transducer activity	molecular_function	4	ENSRNOG00000020650(Slc17a7),ENSRNOG00000010531(Oprd1),ENSRNOG00000014963(Adgrg1),ENSRNOG00000014850(Amhr2)
structural molecule activity	molecular_function	5	ENSRNOG00000019607(Bglap),ENSRNOG00000008609(Capn3),ENSRNOG00000019779(Disc1),ENSRNOG00000005707(Bfsp1),ENSRNOG00000018681(LOC100910255)
nucleic acid binding transcription factor activity	molecular_function	3	ENSRNOG00000013586(Snai3),ENSRNOG00000059469(Otx1),ENSRNOG00000023551(Sp6)
transporter activity	molecular_function	7	ENSRNOG00000000245(Slc16a6),ENSRNOG00000003476(Slc6a4),ENSRNOG00000009897(Clcnkb),ENSRNOG00000039656(Abca17),ENSRNOG00000018378(Cacnb2),ENSRNOG00000050015(LOC100910772),ENSRNOG00000020650(Slc17a7)
molecular function regulator	molecular_function	2	ENSRNOG00000008609(Capn3),ENSRNOG00000018378(Cacnb2)
binding	molecular_function	39	ENSRNOG00000059469(Otx1),ENSRNOG00000008356(Myo5c),ENSRNOG00000014963(Adgrg1),ENSRNOG00000061639(RT1-CE6),ENSRNOG00000005707(Bfsp1),ENSRNOG00000037710(Calr4),ENSRNOG00000030515(Nfasc),ENSRNOG00000013586(Snai3),ENSRNOG00000019789(Tssk4),ENSRNOG00000019607(Bglap),ENSRNOG00000028889(Slc51b),ENSRNOG00000003952(Map3k19),ENSRNOG00000022893(Rimbp2),ENSRNOG00000009897(Clcnkb),ENSRNOG00000047450(Lmo3),ENS…
electron carrier activity	molecular_function	1	ENSRNOG00000050015(LOC100910772)
catalytic activity	molecular_function	17	ENSRNOG00000059227(Akap3),ENSRNOG00000049740(LOC102553099),ENSRNOG00000050205(Afmid),ENSRNOG00000053075(B4galnt4),ENSRNOG00000000257(Smpd3),ENSRNOG00000003681(Lct),ENSRNOG00000050015(LOC100910772),ENSRNOG00000049403(AABR07020847.1),ENSRNOG00000010365(Syn1),ENSRNOG00000014850(Amhr2),ENSRNOG00000039656(Abca17),ENSRNOG00000008356(Myo5c),ENSRNOG00000001242(Gstt3),ENSRNOG00000011646(Rem2),ENSRNOG00000…

## Sheet: S3-H vs S3-N
3H-3N
Up
Term	GO_namespace	Number of DEGs	Genes
cellular process	biological_process		57	ENSRNOG00000008930(Tnfsf15),ENSRNOG00000004125(C4bpb),ENSRNOG00000000405(Vgll2),ENSRNOG00000046007(Cldn3),ENSRNOG00000010259(Esrrb),ENSRNOG00000014698(Chrnb1),ENSRNOG00000008641(Gnpnat1),ENSRNOG00000011000(Rims1),ENSRNOG00000003616(Grem2),ENSRNOG00000017002(Adrb1),ENSRNOG00000010278(Il6),ENSRNOG00000022099(Trim72),ENSRNOG00000010121(Lef1),ENSRNOG00000026653(Hcar2),ENSRNOG00000002460(Serpinb2),ENS…
biological adhesion	biological_process		9	ENSRNOG00000046981(Gp1bb),ENSRNOG00000010121(Lef1),ENSRNOG00000046007(Cldn3),ENSRNOG00000056219(Olr1),ENSRNOG00000020151(Cdh1),ENSRNOG00000010278(Il6),ENSRNOG00000021334(Lag3),ENSRNOG00000005964(Nr4a3),ENSRNOG00000010870(Foxn1)
single-organism process	biological_process		55	ENSRNOG00000053430(Slco4a1),ENSRNOG00000020151(Cdh1),ENSRNOG00000010870(Foxn1),ENSRNOG00000001006(Nptx2),ENSRNOG00000019704(Resp18),ENSRNOG00000006426(Syt1),ENSRNOG00000020009(Npas4),ENSRNOG00000056219(Olr1),ENSRNOG00000013474(Casz1),ENSRNOG00000049277(LOC100911963),ENSRNOG00000018254(Sncaip),ENSRNOG00000012674(Adrb3),ENSRNOG00000021334(Lag3),ENSRNOG00000005964(Nr4a3),ENSRNOG00000027767(Slc38a5),…
regulation of biological process	biological_process		43	ENSRNOG00000010121(Lef1),ENSRNOG00000022099(Trim72),ENSRNOG00000012674(Adrb3),ENSRNOG00000026653(Hcar2),ENSRNOG00000017002(Adrb1),ENSRNOG00000005964(Nr4a3),ENSRNOG00000021334(Lag3),ENSRNOG00000010278(Il6),ENSRNOG00000004499(Gpr135),ENSRNOG00000010513(Tfpi2),ENSRNOG00000007031(Trim9),ENSRNOG00000018394(Chrdl2),ENSRNOG00000002460(Serpinb2),ENSRNOG00000012804(C1qc),ENSRNOG00000023177(Esrp2),ENSRNOG0…
multicellular organismal process	biological_process		38	ENSRNOG00000003616(Grem2),ENSRNOG00000002149(Nkx6-1),ENSRNOG00000014698(Chrnb1),ENSRNOG00000011000(Rims1),ENSRNOG00000008641(Gnpnat1),ENSRNOG00000003687(Rgs2),ENSRNOG00000010259(Esrrb),ENSRNOG00000003595(Lhx4),ENSRNOG00000027799(Tmie),ENSRNOG00000000405(Vgll2),ENSRNOG00000029865(Prss56),ENSRNOG00000020136(Tgm1),ENSRNOG00000046981(Gp1bb),ENSRNOG00000003866(Cxcr4),ENSRNOG00000033433(Csrnp1),ENSRNOG…
reproduction	biological_process		7	ENSRNOG00000008846(Plag1),ENSRNOG00000010259(Esrrb),ENSRNOG00000003595(Lhx4),ENSRNOG00000016361(Plcd4),ENSRNOG00000010121(Lef1),ENSRNOG00000055790(Nup210l),ENSRNOG00000003687(Rgs2)
metabolic process	biological_process		44	ENSRNOG00000027024(Rgs16),ENSRNOG00000000036(Klhdc8a),ENSRNOG00000018254(Sncaip),ENSRNOG00000002568(Socs1),ENSRNOG00000008846(Plag1),ENSRNOG00000051258(Taf9),ENSRNOG00000009574(Crct1),ENSRNOG00000056219(Olr1),ENSRNOG00000020009(Npas4),ENSRNOG00000010870(Foxn1),ENSRNOG00000020244(Perm1),ENSRNOG00000053430(Slco4a1),ENSRNOG00000020151(Cdh1),ENSRNOG00000015438(LOC501233),ENSRNOG00000008641(Gnpnat1),E…
cellular component organization or biogenesis	biological_process		18	ENSRNOG00000010259(Esrrb),ENSRNOG00000046007(Cldn3),ENSRNOG00000003595(Lhx4),ENSRNOG00000058006(Sncg),ENSRNOG00000013547(Slc6a12),ENSRNOG00000018254(Sncaip),ENSRNOG00000049277(LOC100911963),ENSRNOG00000002149(Nkx6-1),ENSRNOG00000014698(Chrnb1),ENSRNOG00000003687(Rgs2),ENSRNOG00000011000(Rims1),ENSRNOG00000020151(Cdh1),ENSRNOG00000022099(Trim72),ENSRNOG00000010121(Lef1),ENSRNOG00000005964(Nr4a3),E…
behavior	biological_process		7	ENSRNOG00000005964(Nr4a3),ENSRNOG00000010278(Il6),ENSRNOG00000001006(Nptx2),ENSRNOG00000012674(Adrb3),ENSRNOG00000014698(Chrnb1),ENSRNOG00000003866(Cxcr4),ENSRNOG00000058006(Sncg)
growth	biological_process		9	ENSRNOG00000008846(Plag1),ENSRNOG00000017002(Adrb1),ENSRNOG00000010278(Il6),ENSRNOG00000012674(Adrb3),ENSRNOG00000010259(Esrrb),ENSRNOG00000010121(Lef1),ENSRNOG00000006426(Syt1),ENSRNOG00000011000(Rims1),ENSRNOG00000002149(Nkx6-1)
response to stimulus	biological_process		34	ENSRNOG00000027770(Trpm3),ENSRNOG00000056219(Olr1),ENSRNOG00000002568(Socs1),ENSRNOG00000051258(Taf9),ENSRNOG00000006426(Syt1),ENSRNOG00000020009(Npas4),ENSRNOG00000020244(Perm1),ENSRNOG00000020151(Cdh1),ENSRNOG00000002149(Nkx6-1),ENSRNOG00000003616(Grem2),ENSRNOG00000013547(Slc6a12),ENSRNOG00000003687(Rgs2),ENSRNOG00000014698(Chrnb1),ENSRNOG00000016361(Plcd4),ENSRNOG00000046007(Cldn3),ENSRNOG000…
developmental process	biological_process		34	ENSRNOG00000012804(C1qc),ENSRNOG00000003866(Cxcr4),ENSRNOG00000033433(Csrnp1),ENSRNOG00000018394(Chrdl2),ENSRNOG00000020136(Tgm1),ENSRNOG00000010278(Il6),ENSRNOG00000017002(Adrb1),ENSRNOG00000005964(Nr4a3),ENSRNOG00000010121(Lef1),ENSRNOG00000022099(Trim72),ENSRNOG00000012674(Adrb3),ENSRNOG00000011000(Rims1),ENSRNOG00000008641(Gnpnat1),ENSRNOG00000003687(Rgs2),ENSRNOG00000014698(Chrnb1),ENSRNOG00…
multi-organism process	biological_process		6	ENSRNOG00000010278(Il6),ENSRNOG00000002568(Socs1),ENSRNOG00000010121(Lef1),ENSRNOG00000016361(Plcd4),ENSRNOG00000055790(Nup210l),ENSRNOG00000003687(Rgs2)
reproductive process	biological_process		7	ENSRNOG00000010259(Esrrb),ENSRNOG00000010121(Lef1),ENSRNOG00000003595(Lhx4),ENSRNOG00000016361(Plcd4),ENSRNOG00000008846(Plag1),ENSRNOG00000055790(Nup210l),ENSRNOG00000003687(Rgs2)
biological regulation	biological_process		48	ENSRNOG00000046981(Gp1bb),ENSRNOG00000018394(Chrdl2),ENSRNOG00000007031(Trim9),ENSRNOG00000010513(Tfpi2),ENSRNOG00000012804(C1qc),ENSRNOG00000002460(Serpinb2),ENSRNOG00000003866(Cxcr4),ENSRNOG00000033433(Csrnp1),ENSRNOG00000023177(Esrp2),ENSRNOG00000022099(Trim72),ENSRNOG00000010121(Lef1),ENSRNOG00000026653(Hcar2),ENSRNOG00000012674(Adrb3),ENSRNOG00000010278(Il6),ENSRNOG00000021334(Lag3),ENSRNOG0…
rhythmic process	biological_process		1	ENSRNOG00000010278(Il6)
positive regulation of biological process	biological_process		25	ENSRNOG00000003687(Rgs2),ENSRNOG00000027024(Rgs16),ENSRNOG00000011000(Rims1),ENSRNOG00000002149(Nkx6-1),ENSRNOG00000008930(Tnfsf15),ENSRNOG00000008846(Plag1),ENSRNOG00000002568(Socs1),ENSRNOG00000000405(Vgll2),ENSRNOG00000051258(Taf9),ENSRNOG00000017386(Il11),ENSRNOG00000004125(C4bpb),ENSRNOG00000010259(Esrrb),ENSRNOG00000006426(Syt1),ENSRNOG00000020009(Npas4),ENSRNOG00000033433(Csrnp1),ENSRNOG00…
cell killing	biological_process		1	ENSRNOG00000021334(Lag3)
locomotion	biological_process		6	ENSRNOG00000010870(Foxn1),ENSRNOG00000003866(Cxcr4),ENSRNOG00000005964(Nr4a3),ENSRNOG00000003595(Lhx4),ENSRNOG00000010121(Lef1),ENSRNOG00000002149(Nkx6-1)
immune system process	biological_process		11	ENSRNOG00000026653(Hcar2),ENSRNOG00000037190(Cd101),ENSRNOG00000010121(Lef1),ENSRNOG00000004125(C4bpb),ENSRNOG00000010870(Foxn1),ENSRNOG00000005964(Nr4a3),ENSRNOG00000008930(Tnfsf15),ENSRNOG00000010278(Il6),ENSRNOG00000021334(Lag3),ENSRNOG00000003866(Cxcr4),ENSRNOG00000012804(C1qc)
negative regulation of biological process	biological_process		24	ENSRNOG00000003687(Rgs2),ENSRNOG00000002149(Nkx6-1),ENSRNOG00000049277(LOC100911963),ENSRNOG00000003616(Grem2),ENSRNOG00000013474(Casz1),ENSRNOG00000004125(C4bpb),ENSRNOG00000017386(Il11),ENSRNOG00000008846(Plag1),ENSRNOG00000002568(Socs1),ENSRNOG00000003595(Lhx4),ENSRNOG00000012804(C1qc),ENSRNOG00000002460(Serpinb2),ENSRNOG00000018394(Chrdl2),ENSRNOG00000007031(Trim9),ENSRNOG00000010513(Tfpi2),E…
signaling	biological_process		28	ENSRNOG00000006426(Syt1),ENSRNOG00000033433(Csrnp1),ENSRNOG00000003866(Cxcr4),ENSRNOG00000020009(Npas4),ENSRNOG00000007031(Trim9),ENSRNOG00000018394(Chrdl2),ENSRNOG00000017002(Adrb1),ENSRNOG00000005964(Nr4a3),ENSRNOG00000021334(Lag3),ENSRNOG00000010278(Il6),ENSRNOG00000004499(Gpr135),ENSRNOG00000010121(Lef1),ENSRNOG00000022099(Trim72),ENSRNOG00000012674(Adrb3),ENSRNOG00000026653(Hcar2),ENSRNOG000…
presynaptic process involved in chemical synaptic transmission	biological_process		5	ENSRNOG00000018254(Sncaip),ENSRNOG00000058006(Sncg),ENSRNOG00000007031(Trim9),ENSRNOG00000011000(Rims1),ENSRNOG00000006426(Syt1)
localization	biological_process		25	ENSRNOG00000010278(Il6),ENSRNOG00000027767(Slc38a5),ENSRNOG00000005964(Nr4a3),ENSRNOG00000010121(Lef1),ENSRNOG00000022099(Trim72),ENSRNOG00000026653(Hcar2),ENSRNOG00000003866(Cxcr4),ENSRNOG00000007031(Trim9),ENSRNOG00000017386(Il11),ENSRNOG00000011334(Tmem63c),ENSRNOG00000011000(Rims1),ENSRNOG00000014698(Chrnb1),ENSRNOG00000002149(Nkx6-1),ENSRNOG00000013547(Slc6a12),ENSRNOG00000050188(AABR0703060…
other organism	cellular_component		1	ENSRNOG00000004125(C4bpb)
organelle	cellular_component		38	ENSRNOG00000022099(Trim72),ENSRNOG00000010121(Lef1),ENSRNOG00000012674(Adrb3),ENSRNOG00000005964(Nr4a3),ENSRNOG00000017002(Adrb1),ENSRNOG00000007031(Trim9),ENSRNOG00000020136(Tgm1),ENSRNOG00000010513(Tfpi2),ENSRNOG00000009144(Lad1),ENSRNOG00000012804(C1qc),ENSRNOG00000023177(Esrp2),ENSRNOG00000033433(Csrnp1),ENSRNOG00000003866(Cxcr4),ENSRNOG00000046007(Cldn3),ENSRNOG00000016361(Plcd4),ENSRNOG0000…
macromolecular complex	cellular_component		13	ENSRNOG00000051258(Taf9),ENSRNOG00000001622(Impg2),ENSRNOG00000010278(Il6),ENSRNOG00000005964(Nr4a3),ENSRNOG00000056219(Olr1),ENSRNOG00000020151(Cdh1),ENSRNOG00000012674(Adrb3),ENSRNOG00000010121(Lef1),ENSRNOG00000000036(Klhdc8a),ENSRNOG00000020009(Npas4),ENSRNOG00000014698(Chrnb1),ENSRNOG00000006426(Syt1),ENSRNOG00000049277(LOC100911963)
synapse part	cellular_component		4	ENSRNOG00000007031(Trim9),ENSRNOG00000011000(Rims1),ENSRNOG00000006426(Syt1),ENSRNOG00000014698(Chrnb1)
extracellular region part	cellular_component		17	ENSRNOG00000058006(Sncg),ENSRNOG00000002149(Nkx6-1),ENSRNOG00000003616(Grem2),ENSRNOG00000001794(Muc13),ENSRNOG00000015438(LOC501233),ENSRNOG00000056219(Olr1),ENSRNOG00000046007(Cldn3),ENSRNOG00000004125(C4bpb),ENSRNOG00000009144(Lad1),ENSRNOG00000018394(Chrdl2),ENSRNOG00000020136(Tgm1),ENSRNOG00000003866(Cxcr4),ENSRNOG00000012804(C1qc),ENSRNOG00000002460(Serpinb2),ENSRNOG00000020151(Cdh1),ENSRNO…
membrane part	cellular_component		32	ENSRNOG00000003866(Cxcr4),ENSRNOG00000046981(Gp1bb),ENSRNOG00000020136(Tgm1),ENSRNOG00000021334(Lag3),ENSRNOG00000010278(Il6),ENSRNOG00000017002(Adrb1),ENSRNOG00000027767(Slc38a5),ENSRNOG00000027276(Xkr4),ENSRNOG00000004499(Gpr135),ENSRNOG00000012674(Adrb3),ENSRNOG00000057616(Ptch2),ENSRNOG00000003687(Rgs2),ENSRNOG00000014698(Chrnb1),ENSRNOG00000055716(Oscar),ENSRNOG00000021474(Siglec5),ENSRNOG00…
supramolecular complex	cellular_component		1	ENSRNOG00000011907(Krt23)
membrane	cellular_component		37	ENSRNOG00000055790(Nup210l),ENSRNOG00000027024(Rgs16),ENSRNOG00000027770(Trpm3),ENSRNOG00000049277(LOC100911963),ENSRNOG00000001794(Muc13),ENSRNOG00000009574(Crct1),ENSRNOG00000056219(Olr1),ENSRNOG00000006426(Syt1),ENSRNOG00000001622(Impg2),ENSRNOG00000020151(Cdh1),ENSRNOG00000053430(Slco4a1),ENSRNOG00000037190(Cd101),ENSRNOG00000055716(Oscar),ENSRNOG00000014698(Chrnb1),ENSRNOG00000057616(Ptch2),…
synapse	cellular_component		4	ENSRNOG00000006426(Syt1),ENSRNOG00000014698(Chrnb1),ENSRNOG00000011000(Rims1),ENSRNOG00000007031(Trim9)
cell junction	cellular_component		5	ENSRNOG00000006426(Syt1),ENSRNOG00000014698(Chrnb1),ENSRNOG00000046007(Cldn3),ENSRNOG00000007031(Trim9),ENSRNOG00000020151(Cdh1)
membrane-enclosed lumen	cellular_component		7	ENSRNOG00000003687(Rgs2),ENSRNOG00000019704(Resp18),ENSRNOG00000023177(Esrp2),ENSRNOG00000013474(Casz1),ENSRNOG00000051258(Taf9),ENSRNOG00000002149(Nkx6-1),ENSRNOG00000056219(Olr1)
cell	cellular_component		53	ENSRNOG00000050188(AABR07030603.1),ENSRNOG00000058006(Sncg),ENSRNOG00000001794(Muc13),ENSRNOG00000009574(Crct1),ENSRNOG00000008846(Plag1),ENSRNOG00000002568(Socs1),ENSRNOG00000002460(Serpinb2),ENSRNOG00000026653(Hcar2),ENSRNOG00000022099(Trim72),ENSRNOG00000010121(Lef1),ENSRNOG00000017002(Adrb1),ENSRNOG00000010278(Il6),ENSRNOG00000014698(Chrnb1),ENSRNOG00000008641(Gnpnat1),ENSRNOG00000011000(Rims…
other organism part	cellular_component		1	ENSRNOG00000004125(C4bpb)
organelle part	cellular_component		14	ENSRNOG00000022099(Trim72),ENSRNOG00000020151(Cdh1),ENSRNOG00000019704(Resp18),ENSRNOG00000011907(Krt23),ENSRNOG00000006426(Syt1),ENSRNOG00000023177(Esrp2),ENSRNOG00000016361(Plcd4),ENSRNOG00000056219(Olr1),ENSRNOG00000019141(Ch25h),ENSRNOG00000013474(Casz1),ENSRNOG00000051258(Taf9),ENSRNOG00000002149(Nkx6-1),ENSRNOG00000049277(LOC100911963),ENSRNOG00000003687(Rgs2)
extracellular region	cellular_component		20	ENSRNOG00000056219(Olr1),ENSRNOG00000046007(Cldn3),ENSRNOG00000004125(C4bpb),ENSRNOG00000008930(Tnfsf15),ENSRNOG00000058006(Sncg),ENSRNOG00000003616(Grem2),ENSRNOG00000001794(Muc13),ENSRNOG00000002149(Nkx6-1),ENSRNOG00000014882(Fgf11),ENSRNOG00000015438(LOC501233),ENSRNOG00000020151(Cdh1),ENSRNOG00000037190(Cd101),ENSRNOG00000010278(Il6),ENSRNOG00000020136(Tgm1),ENSRNOG00000009144(Lad1),ENSRNOG00…
cell part	cellular_component		53	ENSRNOG00000050188(AABR07030603.1),ENSRNOG00000001794(Muc13),ENSRNOG00000058006(Sncg),ENSRNOG00000008846(Plag1),ENSRNOG00000002568(Socs1),ENSRNOG00000009574(Crct1),ENSRNOG00000002460(Serpinb2),ENSRNOG00000010278(Il6),ENSRNOG00000017002(Adrb1),ENSRNOG00000022099(Trim72),ENSRNOG00000010121(Lef1),ENSRNOG00000026653(Hcar2),ENSRNOG00000008641(Gnpnat1),ENSRNOG00000011000(Rims1),ENSRNOG00000014698(Chrnb…
signal transducer activity	molecular_function		11	ENSRNOG00000010121(Lef1),ENSRNOG00000016361(Plcd4),ENSRNOG00000026653(Hcar2),ENSRNOG00000010259(Esrrb),ENSRNOG00000012674(Adrb3),ENSRNOG00000021334(Lag3),ENSRNOG00000005964(Nr4a3),ENSRNOG00000017002(Adrb1),ENSRNOG00000004499(Gpr135),ENSRNOG00000014698(Chrnb1),ENSRNOG00000003866(Cxcr4)
structural molecule activity	molecular_function		4	ENSRNOG00000009574(Crct1),ENSRNOG00000009144(Lad1),ENSRNOG00000011907(Krt23),ENSRNOG00000046007(Cldn3)
molecular function regulator	molecular_function		7	ENSRNOG00000010513(Tfpi2),ENSRNOG00000010121(Lef1),ENSRNOG00000002460(Serpinb2),ENSRNOG00000017002(Adrb1),ENSRNOG00000002568(Socs1),ENSRNOG00000003687(Rgs2),ENSRNOG00000027024(Rgs16)
catalytic activity	molecular_function		11	ENSRNOG00000020136(Tgm1),ENSRNOG00000007031(Trim9),ENSRNOG00000022099(Trim72),ENSRNOG00000014672(Hs3st6),ENSRNOG00000015438(LOC501233),ENSRNOG00000008641(Gnpnat1),ENSRNOG00000049045(LOC100364027),ENSRNOG00000000036(Klhdc8a),ENSRNOG00000016361(Plcd4),ENSRNOG00000036910(LOC100362344),ENSRNOG00000019141(Ch25h)
molecular transducer activity	molecular_function		11	ENSRNOG00000026653(Hcar2),ENSRNOG00000056219(Olr1),ENSRNOG00000010259(Esrrb),ENSRNOG00000012674(Adrb3),ENSRNOG00000010121(Lef1),ENSRNOG00000004499(Gpr135),ENSRNOG00000021334(Lag3),ENSRNOG00000005964(Nr4a3),ENSRNOG00000017002(Adrb1),ENSRNOG00000003866(Cxcr4),ENSRNOG00000014698(Chrnb1)
transcription factor activity, protein binding	molecular_function		1	ENSRNOG00000000405(Vgll2)
binding	molecular_function		52	ENSRNOG00000020136(Tgm1),ENSRNOG00000010278(Il6),ENSRNOG00000017002(Adrb1),ENSRNOG00000022099(Trim72),ENSRNOG00000010121(Lef1),ENSRNOG00000026653(Hcar2),ENSRNOG00000008641(Gnpnat1),ENSRNOG00000011000(Rims1),ENSRNOG00000014698(Chrnb1),ENSRNOG00000003616(Grem2),ENSRNOG00000008930(Tnfsf15),ENSRNOG00000000405(Vgll2),ENSRNOG00000004125(C4bpb),ENSRNOG00000046007(Cldn3),ENSRNOG00000010259(Esrrb),ENSRNOG…
transporter activity	molecular_function		6	ENSRNOG00000014698(Chrnb1),ENSRNOG00000013547(Slc6a12),ENSRNOG00000027770(Trpm3),ENSRNOG00000011334(Tmem63c),ENSRNOG00000027767(Slc38a5),ENSRNOG00000053430(Slco4a1)
nucleic acid binding transcription factor activity	molecular_function		8	ENSRNOG00000002149(Nkx6-1),ENSRNOG00000010121(Lef1),ENSRNOG00000010259(Esrrb),ENSRNOG00000005964(Nr4a3),ENSRNOG00000008846(Plag1),ENSRNOG00000020009(Npas4),ENSRNOG00000010870(Foxn1),ENSRNOG00000033433(Csrnp1)
Down
Term	GO_namespace	Number of DEGs	Genes
cellular process	biological_process	87	ENSRNOG00000007882(Ablim2),ENSRNOG00000042912(Mycbpap),ENSRNOG00000053410(Adcy10),ENSRNOG00000029871(Slc8a3),ENSRNOG00000013279(LOC681458),ENSRNOG00000018693(Asgr1),ENSRNOG00000037137(Svip),ENSRNOG00000021771(Trim29),ENSRNOG00000001082(Abcb9),ENSRNOG00000024390(Osm),ENSRNOG00000007049(Bcl11a),ENSRNOG00000032946(Pdzd7),ENSRNOG00000000658(Acacb),ENSRNOG00000018859(Pik3ip1),ENSRNOG00000011268(Chd5),…
biological adhesion	biological_process	8	ENSRNOG00000008588(Batf),ENSRNOG00000007049(Bcl11a),ENSRNOG00000014464(Tnfsf13b),ENSRNOG00000017917(Cdhr2),ENSRNOG00000020106(Tnfrsf4),ENSRNOG00000013674(Megf10),ENSRNOG00000013294(Sh2d2a),ENSRNOG00000003537(Spta1)
single-organism process	biological_process	75	ENSRNOG00000054371(Prkcg),ENSRNOG00000000245(Slc16a6),ENSRNOG00000009288(Fgf14),ENSRNOG00000020952(Cgn),ENSRNOG00000057040(Spns2),ENSRNOG00000021256(Adra1d),ENSRNOG00000002916(Car4),ENSRNOG00000051891(-),ENSRNOG00000004437(Map2k6),ENSRNOG00000010260(Dixdc1),ENSRNOG00000003537(Spta1),ENSRNOG00000025502(Arhgef37),ENSRNOG00000009030(Rab19),ENSRNOG00000000528(Fgd2),ENSRNOG00000021704(LOC684238),ENSRN…
regulation of biological process	biological_process	59	ENSRNOG00000018859(Pik3ip1),ENSRNOG00000006320(Ptges),ENSRNOG00000000658(Acacb),ENSRNOG00000015736(Dhrs3),ENSRNOG00000023640(Rab25),ENSRNOG00000014464(Tnfsf13b),ENSRNOG00000058202(Ppp2r2c),ENSRNOG00000042504(Zfp964),ENSRNOG00000010816(Kcnk15),ENSRNOG00000003533(Clcn4),ENSRNOG00000052023(AABR07002885.1),ENSRNOG00000011268(Chd5),ENSRNOG00000006804(Ppp1r42),ENSRNOG00000053410(Adcy10),ENSRNOG00000004…
multicellular organismal process	biological_process	41	ENSRNOG00000024390(Osm),ENSRNOG00000007049(Bcl11a),ENSRNOG00000019716(Ntf3),ENSRNOG00000061238(Wnt10b),ENSRNOG00000017084(Hsd11b2),ENSRNOG00000029871(Slc8a3),ENSRNOG00000028598(Edar),ENSRNOG00000018804(Fam65b),ENSRNOG00000004754(Tc2n),ENSRNOG00000016247(Daw1),ENSRNOG00000042912(Mycbpap),ENSRNOG00000053410(Adcy10),ENSRNOG00000003845(Wnt3),ENSRNOG00000005707(Bfsp1),ENSRNOG00000015736(Dhrs3),ENSRNOG…
reproduction	biological_process	9	ENSRNOG00000004437(Map2k6),ENSRNOG00000003845(Wnt3),ENSRNOG00000020245(Syt8),ENSRNOG00000042912(Mycbpap),ENSRNOG00000053410(Adcy10),ENSRNOG00000012721(Ednra),ENSRNOG00000017084(Hsd11b2),ENSRNOG00000032261(Cyp2d4),ENSRNOG00000024390(Osm)
metabolic process	biological_process	62	ENSRNOG00000018712(Camk2a),ENSRNOG00000009892(Adamts15),ENSRNOG00000008588(Batf),ENSRNOG00000021704(LOC684238),ENSRNOG00000000257(Smpd3),ENSRNOG00000000528(Fgd2),ENSRNOG00000010518(Cer1),ENSRNOG00000006353(Gyltl1b),ENSRNOG00000033220(Oas1k),ENSRNOG00000025502(Arhgef37),ENSRNOG00000003537(Spta1),ENSRNOG00000010260(Dixdc1),ENSRNOG00000004437(Map2k6),ENSRNOG00000016483(Myo16),ENSRNOG00000027463(Adam…
cellular component organization or biogenesis	biological_process	29	ENSRNOG00000057729(Strip2),ENSRNOG00000058681(Tsga10),ENSRNOG00000010260(Dixdc1),ENSRNOG00000003537(Spta1),ENSRNOG00000051891(-),ENSRNOG00000000878(Slc44a4),ENSRNOG00000003845(Wnt3),ENSRNOG00000007882(Ablim2),ENSRNOG00000024390(Osm),ENSRNOG00000007049(Bcl11a),ENSRNOG00000021704(LOC684238),ENSRNOG00000019716(Ntf3),ENSRNOG00000061238(Wnt10b),ENSRNOG00000037137(Svip),ENSRNOG00000011044(Clmn),ENSRNOG…
behavior	biological_process	9	ENSRNOG00000003845(Wnt3),ENSRNOG00000009288(Fgf14),ENSRNOG00000017625(Htr2b),ENSRNOG00000054371(Prkcg),ENSRNOG00000012721(Ednra),ENSRNOG00000029871(Slc8a3),ENSRNOG00000026953(Gpr88),ENSRNOG00000019716(Ntf3),ENSRNOG00000024390(Osm)
growth	biological_process	8	ENSRNOG00000000658(Acacb),ENSRNOG00000010518(Cer1),ENSRNOG00000003845(Wnt3),ENSRNOG00000000878(Slc44a4),ENSRNOG00000061238(Wnt10b),ENSRNOG00000017917(Cdhr2),ENSRNOG00000024390(Osm),ENSRNOG00000007049(Bcl11a)
response to stimulus	biological_process	47	ENSRNOG00000008588(Batf),ENSRNOG00000009030(Rab19),ENSRNOG00000009892(Adamts15),ENSRNOG00000000528(Fgd2),ENSRNOG00000018712(Camk2a),ENSRNOG00000026953(Gpr88),ENSRNOG00000012721(Ednra),ENSRNOG00000027463(Adamts3),ENSRNOG00000033220(Oas1k),ENSRNOG00000010518(Cer1),ENSRNOG00000004437(Map2k6),ENSRNOG00000010260(Dixdc1),ENSRNOG00000013294(Sh2d2a),ENSRNOG00000025502(Arhgef37),ENSRNOG00000025624(Arhgap2…
developmental process	biological_process	35	ENSRNOG00000011268(Chd5),ENSRNOG00000018681(LOC100910255),ENSRNOG00000026704(Drp2),ENSRNOG00000005707(Bfsp1),ENSRNOG00000015736(Dhrs3),ENSRNOG00000023640(Rab25),ENSRNOG00000014464(Tnfsf13b),ENSRNOG00000032946(Pdzd7),ENSRNOG00000011649(Epb42),ENSRNOG00000000658(Acacb),ENSRNOG00000028598(Edar),ENSRNOG00000029871(Slc8a3),ENSRNOG00000061238(Wnt10b),ENSRNOG00000019716(Ntf3),ENSRNOG00000007049(Bcl11a),…
multi-organism process	biological_process	13	ENSRNOG00000009288(Fgf14),ENSRNOG00000003845(Wnt3),ENSRNOG00000033220(Oas1k),ENSRNOG00000006320(Ptges),ENSRNOG00000020245(Syt8),ENSRNOG00000012721(Ednra),ENSRNOG00000053410(Adcy10),ENSRNOG00000042912(Mycbpap),ENSRNOG00000017084(Hsd11b2),ENSRNOG00000032261(Cyp2d4),ENSRNOG00000051158(C2),ENSRNOG00000020106(Tnfrsf4),ENSRNOG00000008588(Batf)
reproductive process	biological_process	9	ENSRNOG00000020245(Syt8),ENSRNOG00000012721(Ednra),ENSRNOG00000053410(Adcy10),ENSRNOG00000042912(Mycbpap),ENSRNOG00000004437(Map2k6),ENSRNOG00000003845(Wnt3),ENSRNOG00000024390(Osm),ENSRNOG00000017084(Hsd11b2),ENSRNOG00000032261(Cyp2d4)
biological regulation	biological_process	66	ENSRNOG00000023640(Rab25),ENSRNOG00000015736(Dhrs3),ENSRNOG00000042504(Zfp964),ENSRNOG00000010816(Kcnk15),ENSRNOG00000003533(Clcn4),ENSRNOG00000058202(Ppp2r2c),ENSRNOG00000014464(Tnfsf13b),ENSRNOG00000052023(AABR07002885.1),ENSRNOG00000011268(Chd5),ENSRNOG00000018859(Pik3ip1),ENSRNOG00000011649(Epb42),ENSRNOG00000006320(Ptges),ENSRNOG00000000658(Acacb),ENSRNOG00000001792(Slc12a8),ENSRNOG000000197…
rhythmic process	biological_process	2	ENSRNOG00000004437(Map2k6),ENSRNOG00000054371(Prkcg)
positive regulation of biological process	biological_process	31	ENSRNOG00000018712(Camk2a),ENSRNOG00000029871(Slc8a3),ENSRNOG00000028598(Edar),ENSRNOG00000037137(Svip),ENSRNOG00000061238(Wnt10b),ENSRNOG00000019716(Ntf3),ENSRNOG00000008588(Batf),ENSRNOG00000000528(Fgd2),ENSRNOG00000007049(Bcl11a),ENSRNOG00000024390(Osm),ENSRNOG00000000878(Slc44a4),ENSRNOG00000003845(Wnt3),ENSRNOG00000007882(Ablim2),ENSRNOG00000004437(Map2k6),ENSRNOG00000013294(Sh2d2a),ENSRNOG0…
locomotion	biological_process	9	ENSRNOG00000010260(Dixdc1),ENSRNOG00000017625(Htr2b),ENSRNOG00000010518(Cer1),ENSRNOG00000003845(Wnt3),ENSRNOG00000057040(Spns2),ENSRNOG00000023640(Rab25),ENSRNOG00000012721(Ednra),ENSRNOG00000057729(Strip2),ENSRNOG00000019716(Ntf3)
immune system process	biological_process	18	ENSRNOG00000012721(Ednra),ENSRNOG00000009288(Fgf14),ENSRNOG00000049590(RT1-M2),ENSRNOG00000013294(Sh2d2a),ENSRNOG00000003537(Spta1),ENSRNOG00000011649(Epb42),ENSRNOG00000051891(-),ENSRNOG00000033220(Oas1k),ENSRNOG00000014464(Tnfsf13b),ENSRNOG00000057040(Spns2),ENSRNOG00000000257(Smpd3),ENSRNOG00000007049(Bcl11a),ENSRNOG00000024390(Osm),ENSRNOG00000008588(Batf),ENSRNOG00000061238(Wnt10b),ENSRNOG00…
negative regulation of biological process	biological_process	24	ENSRNOG00000037137(Svip),ENSRNOG00000061238(Wnt10b),ENSRNOG00000011044(Clmn),ENSRNOG00000007049(Bcl11a),ENSRNOG00000024390(Osm),ENSRNOG00000021771(Trim29),ENSRNOG00000019716(Ntf3),ENSRNOG00000010260(Dixdc1),ENSRNOG00000033220(Oas1k),ENSRNOG00000003845(Wnt3),ENSRNOG00000051891(-),ENSRNOG00000010518(Cer1),ENSRNOG00000012721(Ednra),ENSRNOG00000016483(Myo16),ENSRNOG00000021256(Adra1d),ENSRNOG00000017…
signaling	biological_process	34	ENSRNOG00000020106(Tnfrsf4),ENSRNOG00000021256(Adra1d),ENSRNOG00000015736(Dhrs3),ENSRNOG00000023640(Rab25),ENSRNOG00000025624(Arhgap20),ENSRNOG00000057040(Spns2),ENSRNOG00000058202(Ppp2r2c),ENSRNOG00000009288(Fgf14),ENSRNOG00000017625(Htr2b),ENSRNOG00000054371(Prkcg),ENSRNOG00000018859(Pik3ip1),ENSRNOG00000028598(Edar),ENSRNOG00000029871(Slc8a3),ENSRNOG00000018712(Camk2a),ENSRNOG00000061238(Wnt10…
presynaptic process involved in chemical synaptic transmission	biological_process	1	ENSRNOG00000018712(Camk2a)
localization	biological_process	43	ENSRNOG00000032946(Pdzd7),ENSRNOG00000001792(Slc12a8),ENSRNOG00000000658(Acacb),ENSRNOG00000023640(Rab25),ENSRNOG00000003533(Clcn4),ENSRNOG00000010816(Kcnk15),ENSRNOG00000014464(Tnfsf13b),ENSRNOG00000003845(Wnt3),ENSRNOG00000000878(Slc44a4),ENSRNOG00000018927(Sprn),ENSRNOG00000018693(Asgr1),ENSRNOG00000029871(Slc8a3),ENSRNOG00000028598(Edar),ENSRNOG00000042771(Apol3),ENSRNOG00000037137(Svip),ENSR…
biological phase	biological_process	1	ENSRNOG00000061238(Wnt10b)
organelle	cellular_component	57	ENSRNOG00000018859(Pik3ip1),ENSRNOG00000056281(Hist3h3),ENSRNOG00000006320(Ptges),ENSRNOG00000011649(Epb42),ENSRNOG00000032946(Pdzd7),ENSRNOG00000000658(Acacb),ENSRNOG00000014867(Synpo2),ENSRNOG00000017420(Nudt6),ENSRNOG00000023640(Rab25),ENSRNOG00000005707(Bfsp1),ENSRNOG00000011268(Chd5),ENSRNOG00000032261(Cyp2d4),ENSRNOG00000018681(LOC100910255),ENSRNOG00000046858(MGC109340),ENSRNOG00000006804(…
macromolecular complex	cellular_component	14	ENSRNOG00000021480(Rad9b),ENSRNOG00000010260(Dixdc1),ENSRNOG00000049590(RT1-M2),ENSRNOG00000032946(Pdzd7),ENSRNOG00000051891(-),ENSRNOG00000016483(Myo16),ENSRNOG00000046858(MGC109340),ENSRNOG00000037137(Svip),ENSRNOG00000061185(-),ENSRNOG00000003737(Best2),ENSRNOG00000016671(Dtna),ENSRNOG00000020952(Cgn),ENSRNOG00000058202(Ppp2r2c),ENSRNOG00000054080(Cgnl1)
synapse part	cellular_component	4	ENSRNOG00000054371(Prkcg),ENSRNOG00000010260(Dixdc1),ENSRNOG00000018712(Camk2a),ENSRNOG00000029871(Slc8a3)
extracellular region part	cellular_component	20	ENSRNOG00000024390(Osm),ENSRNOG00000009030(Rab19),ENSRNOG00000009892(Adamts15),ENSRNOG00000037137(Svip),ENSRNOG00000033575(Emid1),ENSRNOG00000061238(Wnt10b),ENSRNOG00000011357(Shbg),ENSRNOG00000027463(Adamts3),ENSRNOG00000000878(Slc44a4),ENSRNOG00000003845(Wnt3),ENSRNOG00000051891(-),ENSRNOG00000010518(Cer1),ENSRNOG00000023640(Rab25),ENSRNOG00000002916(Car4),ENSRNOG00000012324(Soga3),ENSRNOG00000…
membrane part	cellular_component	54	ENSRNOG00000032261(Cyp2d4),ENSRNOG00000015736(Dhrs3),ENSRNOG00000010816(Kcnk15),ENSRNOG00000003533(Clcn4),ENSRNOG00000014464(Tnfsf13b),ENSRNOG00000016671(Dtna),ENSRNOG00000006320(Ptges),ENSRNOG00000000433(Prrt1),ENSRNOG00000001792(Slc12a8),ENSRNOG00000049590(RT1-M2),ENSRNOG00000055251(Prtg),ENSRNOG00000013358(Aqp11),ENSRNOG00000018859(Pik3ip1),ENSRNOG00000018693(Asgr1),ENSRNOG00000013279(LOC68145…
supramolecular complex	cellular_component	5	ENSRNOG00000014867(Synpo2),ENSRNOG00000018681(LOC100910255),ENSRNOG00000029871(Slc8a3),ENSRNOG00000014973(Tekt1),ENSRNOG00000007882(Ablim2)
membrane	cellular_component	66	ENSRNOG00000026953(Gpr88),ENSRNOG00000011044(Clmn),ENSRNOG00000018644(Slc6a7),ENSRNOG00000021704(LOC684238),ENSRNOG00000000257(Smpd3),ENSRNOG00000009030(Rab19),ENSRNOG00000003537(Spta1),ENSRNOG00000002224(Yipf7),ENSRNOG00000051891(-),ENSRNOG00000033220(Oas1k),ENSRNOG00000013674(Megf10),ENSRNOG00000006353(Gyltl1b),ENSRNOG00000026919(RGD1565367),ENSRNOG00000016483(Myo16),ENSRNOG00000012721(Ednra),E…
synapse	cellular_component	6	ENSRNOG00000029871(Slc8a3),ENSRNOG00000018712(Camk2a),ENSRNOG00000010260(Dixdc1),ENSRNOG00000000433(Prrt1),ENSRNOG00000054371(Prkcg),ENSRNOG00000016671(Dtna)
cell junction	cellular_component	6	ENSRNOG00000010260(Dixdc1),ENSRNOG00000014867(Synpo2),ENSRNOG00000000433(Prrt1),ENSRNOG00000054080(Cgnl1),ENSRNOG00000054371(Prkcg),ENSRNOG00000020952(Cgn)
membrane-enclosed lumen	cellular_component	8	ENSRNOG00000051891(-),ENSRNOG00000006320(Ptges),ENSRNOG00000021480(Rad9b),ENSRNOG00000018927(Sprn),ENSRNOG00000016483(Myo16),ENSRNOG00000007049(Bcl11a),ENSRNOG00000056281(Hist3h3),ENSRNOG00000021771(Trim29)
cell	cellular_component	85	ENSRNOG00000054080(Cgnl1),ENSRNOG00000020106(Tnfrsf4),ENSRNOG00000061185(-),ENSRNOG00000017917(Cdhr2),ENSRNOG00000020245(Syt8),ENSRNOG00000021480(Rad9b),ENSRNOG00000017625(Htr2b),ENSRNOG00000006841(Ano4),ENSRNOG00000000257(Smpd3),ENSRNOG00000008588(Batf),ENSRNOG00000018644(Slc6a7),ENSRNOG00000018712(Camk2a),ENSRNOG00000016483(Myo16),ENSRNOG00000012721(Ednra),ENSRNOG00000058681(Tsga10),ENSRNOG0000…
organelle part	cellular_component	28	ENSRNOG00000056281(Hist3h3),ENSRNOG00000006320(Ptges),ENSRNOG00000021480(Rad9b),ENSRNOG00000014867(Synpo2),ENSRNOG00000054080(Cgnl1),ENSRNOG00000057040(Spns2),ENSRNOG00000020952(Cgn),ENSRNOG00000032261(Cyp2d4),ENSRNOG00000061185(-),ENSRNOG00000018681(LOC100910255),ENSRNOG00000002916(Car4),ENSRNOG00000012721(Ednra),ENSRNOG00000018927(Sprn),ENSRNOG00000046858(MGC109340),ENSRNOG00000006804(Ppp1r42),…
extracellular region	cellular_component	24	ENSRNOG00000011357(Shbg),ENSRNOG00000027463(Adamts3),ENSRNOG00000051891(-),ENSRNOG00000010518(Cer1),ENSRNOG00000000878(Slc44a4),ENSRNOG00000003845(Wnt3),ENSRNOG00000024390(Osm),ENSRNOG00000009030(Rab19),ENSRNOG00000009892(Adamts15),ENSRNOG00000019716(Ntf3),ENSRNOG00000061238(Wnt10b),ENSRNOG00000042771(Apol3),ENSRNOG00000037137(Svip),ENSRNOG00000033575(Emid1),ENSRNOG00000018859(Pik3ip1),ENSRNOG000…
cell part	cellular_component	85	ENSRNOG00000017917(Cdhr2),ENSRNOG00000061185(-),ENSRNOG00000020106(Tnfrsf4),ENSRNOG00000054080(Cgnl1),ENSRNOG00000006841(Ano4),ENSRNOG00000021480(Rad9b),ENSRNOG00000017625(Htr2b),ENSRNOG00000020245(Syt8),ENSRNOG00000018644(Slc6a7),ENSRNOG00000018712(Camk2a),ENSRNOG00000008588(Batf),ENSRNOG00000000257(Smpd3),ENSRNOG00000006353(Gyltl1b),ENSRNOG00000013674(Megf10),ENSRNOG00000014973(Tekt1),ENSRNOG00…
signal transducer activity	molecular_function	6	ENSRNOG00000012721(Ednra),ENSRNOG00000017625(Htr2b),ENSRNOG00000004437(Map2k6),ENSRNOG00000020106(Tnfrsf4),ENSRNOG00000026953(Gpr88),ENSRNOG00000021256(Adra1d)
structural molecule activity	molecular_function	2	ENSRNOG00000018681(LOC100910255),ENSRNOG00000005707(Bfsp1)
chemoattractant activity	molecular_function	1	ENSRNOG00000019716(Ntf3)
morphogen activity	molecular_function	1	ENSRNOG00000010518(Cer1)
molecular function regulator	molecular_function	6	ENSRNOG00000058202(Ppp2r2c),ENSRNOG00000000528(Fgd2),ENSRNOG00000025624(Arhgap20),ENSRNOG00000025502(Arhgef37),ENSRNOG00000025551(Rgs22),ENSRNOG00000017625(Htr2b)
catalytic activity	molecular_function	33	ENSRNOG00000015736(Dhrs3),ENSRNOG00000054080(Cgnl1),ENSRNOG00000023640(Rab25),ENSRNOG00000020952(Cgn),ENSRNOG00000051158(C2),ENSRNOG00000011268(Chd5),ENSRNOG00000032261(Cyp2d4),ENSRNOG00000002916(Car4),ENSRNOG00000050868(Ddx43),ENSRNOG00000054371(Prkcg),ENSRNOG00000001959(Mx1),ENSRNOG00000006320(Ptges),ENSRNOG00000011649(Epb42),ENSRNOG00000004926(Mettl15),ENSRNOG00000000658(Acacb),ENSRNOG00000017…
molecular transducer activity	molecular_function	7	ENSRNOG00000012721(Ednra),ENSRNOG00000017625(Htr2b),ENSRNOG00000026953(Gpr88),ENSRNOG00000021256(Adra1d),ENSRNOG00000018693(Asgr1),ENSRNOG00000020106(Tnfrsf4),ENSRNOG00000028598(Edar)
transcription factor activity, protein binding	molecular_function	1	ENSRNOG00000007049(Bcl11a)
binding	molecular_function	78	ENSRNOG00000032261(Cyp2d4),ENSRNOG00000011268(Chd5),ENSRNOG00000005707(Bfsp1),ENSRNOG00000016671(Dtna),ENSRNOG00000032946(Pdzd7),ENSRNOG00000000658(Acacb),ENSRNOG00000049590(RT1-M2),ENSRNOG00000018859(Pik3ip1),ENSRNOG00000001959(Mx1),ENSRNOG00000056281(Hist3h3),ENSRNOG00000018693(Asgr1),ENSRNOG00000029871(Slc8a3),ENSRNOG00000037137(Svip),ENSRNOG00000042771(Apol3),ENSRNOG00000024390(Osm),ENSRNOG00…
transporter activity	molecular_function	15	ENSRNOG00000018644(Slc6a7),ENSRNOG00000029871(Slc8a3),ENSRNOG00000003737(Best2),ENSRNOG00000021704(LOC684238),ENSRNOG00000003533(Clcn4),ENSRNOG00000029264(Kcnn1),ENSRNOG00000010816(Kcnk15),ENSRNOG00000057040(Spns2),ENSRNOG00000001082(Abcb9),ENSRNOG00000001792(Slc12a8),ENSRNOG00000026919(RGD1565367),ENSRNOG00000006841(Ano4),ENSRNOG00000000245(Slc16a6),ENSRNOG00000018266(Slc23a3),ENSRNOG00000013358…
nucleic acid binding transcription factor activity	molecular_function	3	ENSRNOG00000008588(Batf),ENSRNOG00000042504(Zfp964),ENSRNOG00000007049(Bcl11a)

## Sheet: S4-H vs S4-N
4H-4N
Up
Term	GO_namespace	Number of DEGs	Genes
response to stimulus	biological_process	19	ENSRNOG00000025612(Sez6l),ENSRNOG00000002866(Rassf6),ENSRNOG00000002164(Nmu),ENSRNOG00000050325(Emr4),ENSRNOG00000020489(Tmem145),ENSRNOG00000054524(Tnip3),ENSRNOG00000028768(Gbp4),ENSRNOG00000019134(Htr4),ENSRNOG00000019057(Prkcq),ENSRNOG00000036685(Npb),ENSRNOG00000031443(Havcr2),ENSRNOG00000002540(Rhoh),ENSRNOG00000013547(Slc6a12),ENSRNOG00000013862(Dusp2),ENSRNOG00000012259(Il22ra2),ENSRNOG00…
signaling	biological_process	16	ENSRNOG00000002540(Rhoh),ENSRNOG00000013547(Slc6a12),ENSRNOG00000013862(Dusp2),ENSRNOG00000012259(Il22ra2),ENSRNOG00000004964(Erbb3),ENSRNOG00000013564(Dok3),ENSRNOG00000053675(Dhh),ENSRNOG00000002866(Rassf6),ENSRNOG00000025612(Sez6l),ENSRNOG00000002164(Nmu),ENSRNOG00000050325(Emr4),ENSRNOG00000020489(Tmem145),ENSRNOG00000054524(Tnip3),ENSRNOG00000019134(Htr4),ENSRNOG00000036685(Npb),ENSRNOG00000…
reproductive process	biological_process	5	ENSRNOG00000031443(Havcr2),ENSRNOG00000001588(Hoxd13),ENSRNOG00000008846(Plag1),ENSRNOG00000055790(Nup210l),ENSRNOG00000053675(Dhh)
reproduction	biological_process	5	ENSRNOG00000008846(Plag1),ENSRNOG00000031443(Havcr2),ENSRNOG00000001588(Hoxd13),ENSRNOG00000053675(Dhh),ENSRNOG00000055790(Nup210l)
single-organism process	biological_process	26	ENSRNOG00000019134(Htr4),ENSRNOG00000036685(Npb),ENSRNOG00000055790(Nup210l),ENSRNOG00000002866(Rassf6),ENSRNOG00000002164(Nmu),ENSRNOG00000050325(Emr4),ENSRNOG00000004964(Erbb3),ENSRNOG00000013564(Dok3),ENSRNOG00000028648(Olig1),ENSRNOG00000047891(Foxg1),ENSRNOG00000031443(Havcr2),ENSRNOG00000002540(Rhoh),ENSRNOG00000001588(Hoxd13),ENSRNOG00000008846(Plag1),ENSRNOG00000054524(Tnip3),ENSRNOG00000…
metabolic process	biological_process	20	ENSRNOG00000053675(Dhh),ENSRNOG00000013862(Dusp2),ENSRNOG00000002916(Car4),ENSRNOG00000012259(Il22ra2),ENSRNOG00000039698(Prss22),ENSRNOG00000013745(Ctrc),ENSRNOG00000019057(Prkcq),ENSRNOG00000052023(AABR07002885.1),ENSRNOG00000028768(Gbp4),ENSRNOG00000015763(Cml3),ENSRNOG00000032429(Tmprss9),ENSRNOG00000051179(Vps25),ENSRNOG00000004964(Erbb3),ENSRNOG00000008846(Plag1),ENSRNOG00000047891(Foxg1),E…
biological regulation	biological_process	24	ENSRNOG00000051179(Vps25),ENSRNOG00000025612(Sez6l),ENSRNOG00000020489(Tmem145),ENSRNOG00000054524(Tnip3),ENSRNOG00000052023(AABR07002885.1),ENSRNOG00000019418(Lrrc4b),ENSRNOG00000019057(Prkcq),ENSRNOG00000013547(Slc6a12),ENSRNOG00000013862(Dusp2),ENSRNOG00000012259(Il22ra2),ENSRNOG00000019110(Ocstamp),ENSRNOG00000053675(Dhh),ENSRNOG00000002866(Rassf6),ENSRNOG00000002164(Nmu),ENSRNOG00000050325(E…
behavior	biological_process	2	ENSRNOG00000025612(Sez6l),ENSRNOG00000002164(Nmu)
multi-organism process	biological_process	5	ENSRNOG00000053675(Dhh),ENSRNOG00000055790(Nup210l),ENSRNOG00000028768(Gbp4),ENSRNOG00000054524(Tnip3),ENSRNOG00000031443(Havcr2)
cellular process	biological_process	30	ENSRNOG00000019057(Prkcq),ENSRNOG00000019418(Lrrc4b),ENSRNOG00000028768(Gbp4),ENSRNOG00000054524(Tnip3),ENSRNOG00000052023(AABR07002885.1),ENSRNOG00000020489(Tmem145),ENSRNOG00000003020(Slc25a47),ENSRNOG00000051179(Vps25),ENSRNOG00000025612(Sez6l),ENSRNOG00000053675(Dhh),ENSRNOG00000019110(Ocstamp),ENSRNOG00000012259(Il22ra2),ENSRNOG00000002916(Car4),ENSRNOG00000013862(Dusp2),ENSRNOG00000013547(S…
localization	biological_process	6	ENSRNOG00000013547(Slc6a12),ENSRNOG00000004964(Erbb3),ENSRNOG00000051179(Vps25),ENSRNOG00000003020(Slc25a47),ENSRNOG00000002164(Nmu),ENSRNOG00000019057(Prkcq)
locomotion	biological_process	1	ENSRNOG00000019057(Prkcq)
multicellular organismal process	biological_process	17	ENSRNOG00000008846(Plag1),ENSRNOG00000002540(Rhoh),ENSRNOG00000031443(Havcr2),ENSRNOG00000001588(Hoxd13),ENSRNOG00000028648(Olig1),ENSRNOG00000047891(Foxg1),ENSRNOG00000053675(Dhh),ENSRNOG00000019110(Ocstamp),ENSRNOG00000004964(Erbb3),ENSRNOG00000013862(Dusp2),ENSRNOG00000015763(Cml3),ENSRNOG00000002164(Nmu),ENSRNOG00000025612(Sez6l),ENSRNOG00000019057(Prkcq),ENSRNOG00000055790(Nup210l),ENSRNOG00…
developmental process	biological_process	15	ENSRNOG00000025612(Sez6l),ENSRNOG00000015763(Cml3),ENSRNOG00000019057(Prkcq),ENSRNOG00000055790(Nup210l),ENSRNOG00000019418(Lrrc4b),ENSRNOG00000001588(Hoxd13),ENSRNOG00000031443(Havcr2),ENSRNOG00000002540(Rhoh),ENSRNOG00000047891(Foxg1),ENSRNOG00000028648(Olig1),ENSRNOG00000008846(Plag1),ENSRNOG00000013862(Dusp2),ENSRNOG00000053675(Dhh),ENSRNOG00000019110(Ocstamp),ENSRNOG00000004964(Erbb3)
negative regulation of biological process	biological_process	9	ENSRNOG00000012259(Il22ra2),ENSRNOG00000013862(Dusp2),ENSRNOG00000054524(Tnip3),ENSRNOG00000019057(Prkcq),ENSRNOG00000004964(Erbb3),ENSRNOG00000031443(Havcr2),ENSRNOG00000002540(Rhoh),ENSRNOG00000047891(Foxg1),ENSRNOG00000008846(Plag1)
cellular component organization or biogenesis	biological_process	5	ENSRNOG00000025612(Sez6l),ENSRNOG00000013547(Slc6a12),ENSRNOG00000019110(Ocstamp),ENSRNOG00000019418(Lrrc4b),ENSRNOG00000019057(Prkcq)
biological adhesion	biological_process	4	ENSRNOG00000004964(Erbb3),ENSRNOG00000019057(Prkcq),ENSRNOG00000028768(Gbp4),ENSRNOG00000002540(Rhoh)
immune system process	biological_process	6	ENSRNOG00000019057(Prkcq),ENSRNOG00000019110(Ocstamp),ENSRNOG00000054524(Tnip3),ENSRNOG00000028768(Gbp4),ENSRNOG00000002540(Rhoh),ENSRNOG00000031443(Havcr2)
positive regulation of biological process	biological_process	11	ENSRNOG00000008846(Plag1),ENSRNOG00000002164(Nmu),ENSRNOG00000001588(Hoxd13),ENSRNOG00000002866(Rassf6),ENSRNOG00000031443(Havcr2),ENSRNOG00000019057(Prkcq),ENSRNOG00000004964(Erbb3),ENSRNOG00000019110(Ocstamp),ENSRNOG00000019134(Htr4),ENSRNOG00000019418(Lrrc4b),ENSRNOG00000054524(Tnip3)
growth	biological_process	3	ENSRNOG00000001588(Hoxd13),ENSRNOG00000019057(Prkcq),ENSRNOG00000008846(Plag1)
regulation of biological process	biological_process	23	ENSRNOG00000012259(Il22ra2),ENSRNOG00000013862(Dusp2),ENSRNOG00000053675(Dhh),ENSRNOG00000004964(Erbb3),ENSRNOG00000019110(Ocstamp),ENSRNOG00000013564(Dok3),ENSRNOG00000002540(Rhoh),ENSRNOG00000031443(Havcr2),ENSRNOG00000001588(Hoxd13),ENSRNOG00000047891(Foxg1),ENSRNOG00000008846(Plag1),ENSRNOG00000054524(Tnip3),ENSRNOG00000052023(AABR07002885.1),ENSRNOG00000036685(Npb),ENSRNOG00000019057(Prkcq),…
organelle	cellular_component	12	ENSRNOG00000002916(Car4),ENSRNOG00000030151(Thsd7a),ENSRNOG00000031443(Havcr2),ENSRNOG00000001588(Hoxd13),ENSRNOG00000047891(Foxg1),ENSRNOG00000008846(Plag1),ENSRNOG00000028768(Gbp4),ENSRNOG00000019057(Prkcq),ENSRNOG00000008555(Rps20),ENSRNOG00000051179(Vps25),ENSRNOG00000025612(Sez6l),ENSRNOG00000003020(Slc25a47)
other organism part	cellular_component	1	ENSRNOG00000028768(Gbp4)
macromolecular complex	cellular_component	1	ENSRNOG00000008555(Rps20)
organelle part	cellular_component	5	ENSRNOG00000028768(Gbp4),ENSRNOG00000002916(Car4),ENSRNOG00000008555(Rps20),ENSRNOG00000051179(Vps25),ENSRNOG00000003020(Slc25a47)
cell part	cellular_component	23	ENSRNOG00000013547(Slc6a12),ENSRNOG00000002916(Car4),ENSRNOG00000012259(Il22ra2),ENSRNOG00000053675(Dhh),ENSRNOG00000025612(Sez6l),ENSRNOG00000051179(Vps25),ENSRNOG00000003020(Slc25a47),ENSRNOG00000032429(Tmprss9),ENSRNOG00000052023(AABR07002885.1),ENSRNOG00000028768(Gbp4),ENSRNOG00000019418(Lrrc4b),ENSRNOG00000019057(Prkcq),ENSRNOG00000047891(Foxg1),ENSRNOG00000001588(Hoxd13),ENSRNOG00000002540(…
membrane	cellular_component	22	ENSRNOG00000032429(Tmprss9),ENSRNOG00000015763(Cml3),ENSRNOG00000020489(Tmem145),ENSRNOG00000003020(Slc25a47),ENSRNOG00000025612(Sez6l),ENSRNOG00000051179(Vps25),ENSRNOG00000019057(Prkcq),ENSRNOG00000031515(Klra2),ENSRNOG00000019418(Lrrc4b),ENSRNOG00000013547(Slc6a12),ENSRNOG00000053675(Dhh),ENSRNOG00000019110(Ocstamp),ENSRNOG00000012259(Il22ra2),ENSRNOG00000030151(Thsd7a),ENSRNOG00000002916(Car4…
cell junction	cellular_component	1	ENSRNOG00000019418(Lrrc4b)
synapse part	cellular_component	2	ENSRNOG00000019418(Lrrc4b),ENSRNOG00000002164(Nmu)
synapse	cellular_component	3	ENSRNOG00000019057(Prkcq),ENSRNOG00000002164(Nmu),ENSRNOG00000019418(Lrrc4b)
membrane-enclosed lumen	cellular_component	1	ENSRNOG00000051179(Vps25)
other organism	cellular_component	1	ENSRNOG00000028768(Gbp4)
extracellular region	cellular_component	10	ENSRNOG00000012259(Il22ra2),ENSRNOG00000030151(Thsd7a),ENSRNOG00000028768(Gbp4),ENSRNOG00000002916(Car4),ENSRNOG00000036685(Npb),ENSRNOG00000053675(Dhh),ENSRNOG00000004964(Erbb3),ENSRNOG00000051179(Vps25),ENSRNOG00000031443(Havcr2),ENSRNOG00000002164(Nmu)
extracellular region part	cellular_component	7	ENSRNOG00000053675(Dhh),ENSRNOG00000004964(Erbb3),ENSRNOG00000030151(Thsd7a),ENSRNOG00000028768(Gbp4),ENSRNOG00000002916(Car4),ENSRNOG00000051179(Vps25),ENSRNOG00000031443(Havcr2)
membrane part	cellular_component	19	ENSRNOG00000050325(Emr4),ENSRNOG00000020489(Tmem145),ENSRNOG00000032429(Tmprss9),ENSRNOG00000015763(Cml3),ENSRNOG00000003020(Slc25a47),ENSRNOG00000025612(Sez6l),ENSRNOG00000055790(Nup210l),ENSRNOG00000019057(Prkcq),ENSRNOG00000019418(Lrrc4b),ENSRNOG00000031515(Klra2),ENSRNOG00000019134(Htr4),ENSRNOG00000013547(Slc6a12),ENSRNOG00000031443(Havcr2),ENSRNOG00000002540(Rhoh),ENSRNOG00000019110(Ocstamp…
cell	cellular_component	23	ENSRNOG00000051179(Vps25),ENSRNOG00000025612(Sez6l),ENSRNOG00000003020(Slc25a47),ENSRNOG00000032429(Tmprss9),ENSRNOG00000028768(Gbp4),ENSRNOG00000052023(AABR07002885.1),ENSRNOG00000019418(Lrrc4b),ENSRNOG00000019057(Prkcq),ENSRNOG00000013547(Slc6a12),ENSRNOG00000002916(Car4),ENSRNOG00000012259(Il22ra2),ENSRNOG00000053675(Dhh),ENSRNOG00000002164(Nmu),ENSRNOG00000050325(Emr4),ENSRNOG00000008555(Rps2…
binding	molecular_function	28	ENSRNOG00000013564(Dok3),ENSRNOG00000004964(Erbb3),ENSRNOG00000055986(Ttc23l),ENSRNOG00000008846(Plag1),ENSRNOG00000028648(Olig1),ENSRNOG00000047891(Foxg1),ENSRNOG00000002540(Rhoh),ENSRNOG00000001588(Hoxd13),ENSRNOG00000008555(Rps20),ENSRNOG00000019134(Htr4),ENSRNOG00000036685(Npb),ENSRNOG00000002164(Nmu),ENSRNOG00000050325(Emr4),ENSRNOG00000002866(Rassf6),ENSRNOG00000053675(Dhh),ENSRNOG000000029…
structural molecule activity	molecular_function	1	ENSRNOG00000008555(Rps20)
nucleic acid binding transcription factor activity	molecular_function	3	ENSRNOG00000047891(Foxg1),ENSRNOG00000001588(Hoxd13),ENSRNOG00000008846(Plag1)
molecular transducer activity	molecular_function	4	ENSRNOG00000050325(Emr4),ENSRNOG00000004964(Erbb3),ENSRNOG00000019134(Htr4),ENSRNOG00000012259(Il22ra2)
molecular function regulator	molecular_function	2	ENSRNOG00000002540(Rhoh),ENSRNOG00000004964(Erbb3)
signal transducer activity	molecular_function	4	ENSRNOG00000050325(Emr4),ENSRNOG00000004964(Erbb3),ENSRNOG00000019134(Htr4),ENSRNOG00000012259(Il22ra2)
catalytic activity	molecular_function	10	ENSRNOG00000004964(Erbb3),ENSRNOG00000053675(Dhh),ENSRNOG00000013862(Dusp2),ENSRNOG00000002916(Car4),ENSRNOG00000039698(Prss22),ENSRNOG00000013745(Ctrc),ENSRNOG00000019057(Prkcq),ENSRNOG00000028768(Gbp4),ENSRNOG00000032429(Tmprss9),ENSRNOG00000015763(Cml3)
transporter activity	molecular_function	1	ENSRNOG00000013547(Slc6a12)
Down
Term	GO_namespace	Number of DEGs	Genes
response to stimulus	biological_process	38	ENSRNOG00000013953(Ntrk1),ENSRNOG00000016684(Wnk2),ENSRNOG00000031773(Cngb1),ENSRNOG00000018570(C1qtnf3),ENSRNOG00000033220(Oas1k),ENSRNOG00000015593(Sigirr),ENSRNOG00000015724(Gucy2g),ENSRNOG00000051171(G6pc),ENSRNOG00000026503(Xrra1),ENSRNOG00000025489(Pkd2l2),ENSRNOG00000014071(Ddb2),ENSRNOG00000005781(Wnt16),ENSRNOG00000025378(Ccdc155),ENSRNOG00000008919(Arpp21),ENSRNOG00000011901(Rrad),ENSRN…
signaling	biological_process	28	ENSRNOG00000010531(Oprd1),ENSRNOG00000045679(Apoa1),ENSRNOG00000012628(Gpr18),ENSRNOG00000009872(Kcnh2),ENSRNOG00000059227(Akap3),ENSRNOG00000000257(Smpd3),ENSRNOG00000026653(Hcar2),ENSRNOG00000019065(Zfp385b),ENSRNOG00000018111(Slc12a5),ENSRNOG00000011726(Grin1),ENSRNOG00000028632(Bcl2l14),ENSRNOG00000000528(Fgd2),ENSRNOG00000050831(Vom2r35),ENSRNOG00000012721(Ednra),ENSRNOG00000030771(Dgkb),ENS…
reproductive process	biological_process	11	ENSRNOG00000017175(Hist1h1a),ENSRNOG00000032261(Cyp2d4),ENSRNOG00000019265(Pcdh12),ENSRNOG00000027916(Txndc2),ENSRNOG00000013953(Ntrk1),ENSRNOG00000058275(Spef2),ENSRNOG00000025378(Ccdc155),ENSRNOG00000012721(Ednra),ENSRNOG00000060343(Asz1),ENSRNOG00000011726(Grin1),ENSRNOG00000022335(Rad21l1)
reproduction	biological_process	11	ENSRNOG00000058275(Spef2),ENSRNOG00000017175(Hist1h1a),ENSRNOG00000019265(Pcdh12),ENSRNOG00000032261(Cyp2d4),ENSRNOG00000027916(Txndc2),ENSRNOG00000013953(Ntrk1),ENSRNOG00000022335(Rad21l1),ENSRNOG00000012721(Ednra),ENSRNOG00000025378(Ccdc155),ENSRNOG00000060343(Asz1),ENSRNOG00000011726(Grin1)
cell killing	biological_process	1	ENSRNOG00000023659(Raet1d)
presynaptic process involved in chemical synaptic transmission	biological_process	2	ENSRNOG00000046139(Syt14),ENSRNOG00000059765(Asic1)
single-organism process	biological_process	68	ENSRNOG00000005781(Wnt16),ENSRNOG00000000245(Slc16a6),ENSRNOG00000009291(Dnase1l3),ENSRNOG00000012827(Mlf1),ENSRNOG00000013953(Ntrk1),ENSRNOG00000001141(Srrm4),ENSRNOG00000019265(Pcdh12),ENSRNOG00000016684(Wnk2),ENSRNOG00000017175(Hist1h1a),ENSRNOG00000030927(Grid2ip),ENSRNOG00000018570(C1qtnf3),ENSRNOG00000011044(Clmn),ENSRNOG00000050205(Afmid),ENSRNOG00000019065(Zfp385b),ENSRNOG00000018111(Slc1…
metabolic process	biological_process	45	ENSRNOG00000022335(Rad21l1),ENSRNOG00000039865(Vnn3),ENSRNOG00000000528(Fgd2),ENSRNOG00000012721(Ednra),ENSRNOG00000014373(Trim66),ENSRNOG00000029370(Abhd3),ENSRNOG00000059227(Akap3),ENSRNOG00000042084(Acsm1),ENSRNOG00000025883(Ip6k3),ENSRNOG00000000920(Phkg1),ENSRNOG00000014550(Plcxd3),ENSRNOG00000022009(Mzb1),ENSRNOG00000027916(Txndc2),ENSRNOG00000039210(LOC502618),ENSRNOG00000045679(Apoa1),ENS…
biological regulation	biological_process	41	ENSRNOG00000005944(Slurp1),ENSRNOG00000031773(Cngb1),ENSRNOG00000033220(Oas1k),ENSRNOG00000015593(Sigirr),ENSRNOG00000046139(Syt14),ENSRNOG00000016812(Adamts16),ENSRNOG00000026679(Scn4b),ENSRNOG00000015724(Gucy2g),ENSRNOG00000051171(G6pc),ENSRNOG00000043329(Rnf180),ENSRNOG00000011901(Rrad),ENSRNOG00000019589(Tas1r3),ENSRNOG00000017602(Il34),ENSRNOG00000045679(Apoa1),ENSRNOG00000027916(Txndc2),ENS…
behavior	biological_process	10	ENSRNOG00000012721(Ednra),ENSRNOG00000013953(Ntrk1),ENSRNOG00000005944(Slurp1),ENSRNOG00000010531(Oprd1),ENSRNOG00000018111(Slc12a5),ENSRNOG00000011726(Grin1),ENSRNOG00000008728(Unc79),ENSRNOG00000043329(Rnf180),ENSRNOG00000059765(Asic1),ENSRNOG00000019842(Artn)
multi-organism process	biological_process	11	ENSRNOG00000022335(Rad21l1),ENSRNOG00000025378(Ccdc155),ENSRNOG00000012721(Ednra),ENSRNOG00000060343(Asz1),ENSRNOG00000011726(Grin1),ENSRNOG00000058275(Spef2),ENSRNOG00000033220(Oas1k),ENSRNOG00000017175(Hist1h1a),ENSRNOG00000019265(Pcdh12),ENSRNOG00000032261(Cyp2d4),ENSRNOG00000027916(Txndc2)
cellular process	biological_process	68	ENSRNOG00000017602(Il34),ENSRNOG00000019589(Tas1r3),ENSRNOG00000011901(Rrad),ENSRNOG00000025378(Ccdc155),ENSRNOG00000060343(Asz1),ENSRNOG00000043329(Rnf180),ENSRNOG00000014071(Ddb2),ENSRNOG00000051171(G6pc),ENSRNOG00000026679(Scn4b),ENSRNOG00000015724(Gucy2g),ENSRNOG00000026704(Drp2),ENSRNOG00000016812(Adamts16),ENSRNOG00000046139(Syt14),ENSRNOG00000033220(Oas1k),ENSRNOG00000015593(Sigirr),ENSRNO…
localization	biological_process	28	ENSRNOG00000010531(Oprd1),ENSRNOG00000045679(Apoa1),ENSRNOG00000027916(Txndc2),ENSRNOG00000009872(Kcnh2),ENSRNOG00000011892(Slc36a2),ENSRNOG00000059227(Akap3),ENSRNOG00000022009(Mzb1),ENSRNOG00000020927(Tulp2),ENSRNOG00000000257(Smpd3),ENSRNOG00000026653(Hcar2),ENSRNOG00000011726(Grin1),ENSRNOG00000018111(Slc12a5),ENSRNOG00000047321(Hba2),ENSRNOG00000012721(Ednra),ENSRNOG00000015590(Dnaaf1),ENSRN…
locomotion	biological_process	6	ENSRNOG00000013953(Ntrk1),ENSRNOG00000045679(Apoa1),ENSRNOG00000027916(Txndc2),ENSRNOG00000019842(Artn),ENSRNOG00000002548(Tnn),ENSRNOG00000012721(Ednra)
multicellular organismal process	biological_process	37	ENSRNOG00000000257(Smpd3),ENSRNOG00000026653(Hcar2),ENSRNOG00000058275(Spef2),ENSRNOG00000009872(Kcnh2),ENSRNOG00000032261(Cyp2d4),ENSRNOG00000045679(Apoa1),ENSRNOG00000027916(Txndc2),ENSRNOG00000008728(Unc79),ENSRNOG00000010531(Oprd1),ENSRNOG00000022335(Rad21l1),ENSRNOG00000002548(Tnn),ENSRNOG00000019842(Artn),ENSRNOG00000059765(Asic1),ENSRNOG00000015590(Dnaaf1),ENSRNOG00000012721(Ednra),ENSRNOG…
developmental process	biological_process	27	ENSRNOG00000031773(Cngb1),ENSRNOG00000019265(Pcdh12),ENSRNOG00000001141(Srrm4),ENSRNOG00000013953(Ntrk1),ENSRNOG00000051171(G6pc),ENSRNOG00000016812(Adamts16),ENSRNOG00000026704(Drp2),ENSRNOG00000011044(Clmn),ENSRNOG00000027799(Tmie),ENSRNOG00000025378(Ccdc155),ENSRNOG00000005781(Wnt16),ENSRNOG00000017602(Il34),ENSRNOG00000009291(Dnase1l3),ENSRNOG00000027916(Txndc2),ENSRNOG00000008728(Unc79),ENSR…
rhythmic process	biological_process	2	ENSRNOG00000013953(Ntrk1),ENSRNOG00000011726(Grin1)
negative regulation of biological process	biological_process	19	ENSRNOG00000012721(Ednra),ENSRNOG00000005781(Wnt16),ENSRNOG00000011726(Grin1),ENSRNOG00000059765(Asic1),ENSRNOG00000012827(Mlf1),ENSRNOG00000011901(Rrad),ENSRNOG00000016684(Wnk2),ENSRNOG00000010531(Oprd1),ENSRNOG00000005944(Slurp1),ENSRNOG00000013953(Ntrk1),ENSRNOG00000045679(Apoa1),ENSRNOG00000022009(Mzb1),ENSRNOG00000026653(Hcar2),ENSRNOG00000015593(Sigirr),ENSRNOG00000033220(Oas1k),ENSRNOG0000…
cellular component organization or biogenesis	biological_process	26	ENSRNOG00000010531(Oprd1),ENSRNOG00000013953(Ntrk1),ENSRNOG00000045679(Apoa1),ENSRNOG00000031773(Cngb1),ENSRNOG00000017175(Hist1h1a),ENSRNOG00000016812(Adamts16),ENSRNOG00000009872(Kcnh2),ENSRNOG00000011044(Clmn),ENSRNOG00000026704(Drp2),ENSRNOG00000018570(C1qtnf3),ENSRNOG00000020927(Tulp2),ENSRNOG00000022009(Mzb1),ENSRNOG00000058275(Spef2),ENSRNOG00000005781(Wnt16),ENSRNOG00000011726(Grin1),ENSR…
biological adhesion	biological_process	4	ENSRNOG00000002548(Tnn),ENSRNOG00000045679(Apoa1),ENSRNOG00000042078(Icam4),ENSRNOG00000019265(Pcdh12)
immune system process	biological_process	11	ENSRNOG00000019842(Artn),ENSRNOG00000017602(Il34),ENSRNOG00000012721(Ednra),ENSRNOG00000022009(Mzb1),ENSRNOG00000026653(Hcar2),ENSRNOG00000058275(Spef2),ENSRNOG00000000257(Smpd3),ENSRNOG00000033220(Oas1k),ENSRNOG00000023659(Raet1d),ENSRNOG00000045679(Apoa1),ENSRNOG00000013953(Ntrk1)
positive regulation of biological process	biological_process	17	ENSRNOG00000026679(Scn4b),ENSRNOG00000026653(Hcar2),ENSRNOG00000022009(Mzb1),ENSRNOG00000009872(Kcnh2),ENSRNOG00000018570(C1qtnf3),ENSRNOG00000016684(Wnk2),ENSRNOG00000010531(Oprd1),ENSRNOG00000013953(Ntrk1),ENSRNOG00000045679(Apoa1),ENSRNOG00000017602(Il34),ENSRNOG00000019842(Artn),ENSRNOG00000000528(Fgd2),ENSRNOG00000012721(Ednra),ENSRNOG00000028632(Bcl2l14),ENSRNOG00000005781(Wnt16),ENSRNOG000…
growth	biological_process	5	ENSRNOG00000008728(Unc79),ENSRNOG00000018111(Slc12a5),ENSRNOG00000011901(Rrad),ENSRNOG00000002548(Tnn),ENSRNOG00000051171(G6pc)
regulation of biological process	biological_process	39	ENSRNOG00000000528(Fgd2),ENSRNOG00000050831(Vom2r35),ENSRNOG00000012721(Ednra),ENSRNOG00000019065(Zfp385b),ENSRNOG00000028632(Bcl2l14),ENSRNOG00000011726(Grin1),ENSRNOG00000059765(Asic1),ENSRNOG00000019842(Artn),ENSRNOG00000030771(Dgkb),ENSRNOG00000015590(Dnaaf1),ENSRNOG00000012628(Gpr18),ENSRNOG00000027916(Txndc2),ENSRNOG00000045679(Apoa1),ENSRNOG00000010531(Oprd1),ENSRNOG00000026653(Hcar2),ENSR…
organelle	cellular_component	40	ENSRNOG00000011497(Aldh1b1),ENSRNOG00000012721(Ednra),ENSRNOG00000061442(AABR07068214.1),ENSRNOG00000050205(Afmid),ENSRNOG00000019065(Zfp385b),ENSRNOG00000036700(Fscn2),ENSRNOG00000011726(Grin1),ENSRNOG00000028632(Bcl2l14),ENSRNOG00000022335(Rad21l1),ENSRNOG00000015590(Dnaaf1),ENSRNOG00000032261(Cyp2d4),ENSRNOG00000027916(Txndc2),ENSRNOG00000045679(Apoa1),ENSRNOG00000010531(Oprd1),ENSRNOG00000058…
macromolecular complex	cellular_component	17	ENSRNOG00000022335(Rad21l1),ENSRNOG00000019589(Tas1r3),ENSRNOG00000011726(Grin1),ENSRNOG00000047321(Hba2),ENSRNOG00000014071(Ddb2),ENSRNOG00000011502(Col9a2),ENSRNOG00000060343(Asz1),ENSRNOG00000026679(Scn4b),ENSRNOG00000022009(Mzb1),ENSRNOG00000000920(Phkg1),ENSRNOG00000009872(Kcnh2),ENSRNOG00000018570(C1qtnf3),ENSRNOG00000031773(Cngb1),ENSRNOG00000017175(Hist1h1a),ENSRNOG00000046858(MGC109340),…
organelle part	cellular_component	22	ENSRNOG00000036700(Fscn2),ENSRNOG00000043329(Rnf180),ENSRNOG00000025378(Ccdc155),ENSRNOG00000012721(Ednra),ENSRNOG00000011497(Aldh1b1),ENSRNOG00000015590(Dnaaf1),ENSRNOG00000012827(Mlf1),ENSRNOG00000022335(Rad21l1),ENSRNOG00000046858(MGC109340),ENSRNOG00000013953(Ntrk1),ENSRNOG00000027916(Txndc2),ENSRNOG00000031773(Cngb1),ENSRNOG00000032261(Cyp2d4),ENSRNOG00000017175(Hist1h1a),ENSRNOG00000009872(…
cell part	cellular_component	64	ENSRNOG00000045679(Apoa1),ENSRNOG00000027916(Txndc2),ENSRNOG00000032261(Cyp2d4),ENSRNOG00000014373(Trim66),ENSRNOG00000059227(Akap3),ENSRNOG00000025883(Ip6k3),ENSRNOG00000042084(Acsm1),ENSRNOG00000022009(Mzb1),ENSRNOG00000000920(Phkg1),ENSRNOG00000028632(Bcl2l14),ENSRNOG00000036700(Fscn2),ENSRNOG00000047321(Hba2),ENSRNOG00000012721(Ednra),ENSRNOG00000059765(Asic1),ENSRNOG00000022335(Rad21l1),ENSR…
membrane	cellular_component	46	ENSRNOG00000026679(Scn4b),ENSRNOG00000015724(Gucy2g),ENSRNOG00000051171(G6pc),ENSRNOG00000033220(Oas1k),ENSRNOG00000015593(Sigirr),ENSRNOG00000046139(Syt14),ENSRNOG00000026704(Drp2),ENSRNOG00000031773(Cngb1),ENSRNOG00000042078(Icam4),ENSRNOG00000011901(Rrad),ENSRNOG00000019589(Tas1r3),ENSRNOG00000027799(Tmie),ENSRNOG00000025378(Ccdc155),ENSRNOG00000018167(Tmem221),ENSRNOG00000043329(Rnf180),ENSRN…
cell junction	cellular_component	4	ENSRNOG00000014071(Ddb2),ENSRNOG00000011726(Grin1),ENSRNOG00000019265(Pcdh12),ENSRNOG00000026679(Scn4b)
synapse part	cellular_component	4	ENSRNOG00000010531(Oprd1),ENSRNOG00000011726(Grin1),ENSRNOG00000030927(Grid2ip),ENSRNOG00000031773(Cngb1)
synapse	cellular_component	4	ENSRNOG00000031773(Cngb1),ENSRNOG00000011726(Grin1),ENSRNOG00000010531(Oprd1),ENSRNOG00000030927(Grid2ip)
membrane-enclosed lumen	cellular_component	8	ENSRNOG00000011497(Aldh1b1),ENSRNOG00000017175(Hist1h1a),ENSRNOG00000025378(Ccdc155),ENSRNOG00000027916(Txndc2),ENSRNOG00000012827(Mlf1),ENSRNOG00000022335(Rad21l1),ENSRNOG00000022009(Mzb1),ENSRNOG00000014373(Trim66)
extracellular region	cellular_component	14	ENSRNOG00000039865(Vnn3),ENSRNOG00000005781(Wnt16),ENSRNOG00000011726(Grin1),ENSRNOG00000019842(Artn),ENSRNOG00000002548(Tnn),ENSRNOG00000042078(Icam4),ENSRNOG00000019265(Pcdh12),ENSRNOG00000005944(Slurp1),ENSRNOG00000045679(Apoa1),ENSRNOG00000042084(Acsm1),ENSRNOG00000022009(Mzb1),ENSRNOG00000016812(Adamts16),ENSRNOG00000011892(Slc36a2),ENSRNOG00000018570(C1qtnf3)
supramolecular complex	cellular_component	1	ENSRNOG00000027916(Txndc2)
extracellular region part	cellular_component	12	ENSRNOG00000019842(Artn),ENSRNOG00000002548(Tnn),ENSRNOG00000039865(Vnn3),ENSRNOG00000005781(Wnt16),ENSRNOG00000042084(Acsm1),ENSRNOG00000016812(Adamts16),ENSRNOG00000011892(Slc36a2),ENSRNOG00000018570(C1qtnf3),ENSRNOG00000042078(Icam4),ENSRNOG00000019265(Pcdh12),ENSRNOG00000005944(Slurp1),ENSRNOG00000045679(Apoa1)
membrane part	cellular_component	41	ENSRNOG00000015724(Gucy2g),ENSRNOG00000026679(Scn4b),ENSRNOG00000051171(G6pc),ENSRNOG00000011044(Clmn),ENSRNOG00000015593(Sigirr),ENSRNOG00000033220(Oas1k),ENSRNOG00000046139(Syt14),ENSRNOG00000019265(Pcdh12),ENSRNOG00000031773(Cngb1),ENSRNOG00000042078(Icam4),ENSRNOG00000013953(Ntrk1),ENSRNOG00000046858(MGC109340),ENSRNOG00000027601(Lhfpl1),ENSRNOG00000019589(Tas1r3),ENSRNOG00000000245(Slc16a6),…
cell	cellular_component	64	ENSRNOG00000031773(Cngb1),ENSRNOG00000042078(Icam4),ENSRNOG00000026704(Drp2),ENSRNOG00000033220(Oas1k),ENSRNOG00000046139(Syt14),ENSRNOG00000015724(Gucy2g),ENSRNOG00000026679(Scn4b),ENSRNOG00000051171(G6pc),ENSRNOG00000014071(Ddb2),ENSRNOG00000043329(Rnf180),ENSRNOG00000060343(Asz1),ENSRNOG00000025378(Ccdc155),ENSRNOG00000011901(Rrad),ENSRNOG00000019589(Tas1r3),ENSRNOG00000045679(Apoa1),ENSRNOG00…
chemorepellent activity	molecular_function	1	ENSRNOG00000045679(Apoa1)
molecular transducer activity	molecular_function	11	ENSRNOG00000059765(Asic1),ENSRNOG00000026653(Hcar2),ENSRNOG00000009872(Kcnh2),ENSRNOG00000019589(Tas1r3),ENSRNOG00000031773(Cngb1),ENSRNOG00000012628(Gpr18),ENSRNOG00000050831(Vom2r35),ENSRNOG00000012721(Ednra),ENSRNOG00000010531(Oprd1),ENSRNOG00000013953(Ntrk1),ENSRNOG00000011726(Grin1)
molecular function regulator	molecular_function	3	ENSRNOG00000026679(Scn4b),ENSRNOG00000000528(Fgd2),ENSRNOG00000045679(Apoa1)
signal transducer activity	molecular_function	9	ENSRNOG00000026653(Hcar2),ENSRNOG00000009872(Kcnh2),ENSRNOG00000019589(Tas1r3),ENSRNOG00000012628(Gpr18),ENSRNOG00000050831(Vom2r35),ENSRNOG00000012721(Ednra),ENSRNOG00000011726(Grin1),ENSRNOG00000013953(Ntrk1),ENSRNOG00000010531(Oprd1)
catalytic activity	molecular_function	29	ENSRNOG00000020148(Il4i1),ENSRNOG00000030771(Dgkb),ENSRNOG00000050205(Afmid),ENSRNOG00000039865(Vnn3),ENSRNOG00000011497(Aldh1b1),ENSRNOG00000029370(Abhd3),ENSRNOG00000009872(Kcnh2),ENSRNOG00000059227(Akap3),ENSRNOG00000025883(Ip6k3),ENSRNOG00000042084(Acsm1),ENSRNOG00000000257(Smpd3),ENSRNOG00000014550(Plcxd3),ENSRNOG00000000920(Phkg1),ENSRNOG00000039210(LOC502618),ENSRNOG00000027916(Txndc2),ENS…
transporter activity	molecular_function	11	ENSRNOG00000011892(Slc36a2),ENSRNOG00000009872(Kcnh2),ENSRNOG00000059765(Asic1),ENSRNOG00000026679(Scn4b),ENSRNOG00000047321(Hba2),ENSRNOG00000045679(Apoa1),ENSRNOG00000025489(Pkd2l2),ENSRNOG00000018111(Slc12a5),ENSRNOG00000011726(Grin1),ENSRNOG00000000245(Slc16a6),ENSRNOG00000031773(Cngb1)
