# Supplementary material for: Effect of high glucose on the gene expression profiling in cardiac fibroblasts from rats at different ages
Source: PeerJ journal article supplement (doi:10.7717/peerj.19040), 2025-03-03
Supplement: H_vs_N_heatmaps.xlsx [file H_vs_N_heatmaps.xlsx]

## Sheet: S1-H VS S1-N
group	1-H	1-H	1-H	1-N	1-N	1-N
gene name	1-H1	1-H2	1-H3	1-N1	1-N2	1-N3
Ctxn3	0.0428977	0	0	0.133932	0.144383	0.239106
Sprn	0.10309	0	0	0.536508	0.231275	0.45971
AABR07027309.1	0	0	0.0326207	0.0942026	0.0338631	0.23547
Cd6	0.00950215	0	0	0.0197849	0.0319818	0.0529636
Nanos3	0.0620215	0	0	0.258208	0.139141	0.207449
Gdap1	0.0116557	0	0	0.0606594	0.0392301	0.0129907
Cngb1	0	0	0.00873995	0.0168322	0.0453448	0.0180199
Opn4	0	0.0185472	0	0.091233	0.0196746	0.0586354
Phex	0	0.0114755	0.0117264	0.011292	0.0121731	0.181382
Tmem100	0.0327879	0	0.0354481	0.238906	0.294269	0
LOC102553099	0	0.282197	0	0.925085	0	0.99078
Baiap2l2	0.0877167	0	0	0.152113	0.22952	0.195492
Gimap8	0	0.0282866	0	0.0556534	0.104973	0.014899
AC117058.1	0.575822	0.823979	0.549027	0.140945	0.417792	11.5115
Pdzd3	0.0662316	0	0	0.0229759	0.123791	0.246023
Cdh16	0.0313995	0	0.0169646	0.032672	0.123219	0.122457
Ppp1r42	0	0	0.139396	0.357902	0.241073	0.143753
AABR07002337.1	0.0494472	0	0	0.0685951	0.0739477	0.110202
Rn60_20_0051.7	0	0	1.12297	1.65778	2.56364	1.15799
Adad1	0	0.0210734	0.0430684	0.0829231	0.156409	0.0443989
Tmem179	0.0382272	0.040423	0.0206534	0.178951	0.214309	0.0425829
Slc12a8	0.0568897	0.045134	0.0307364	0.177554	0.127577	0.269398
Cldn5	0.192826	0.101987	0.173634	1.00302	0.39639	0.608744
Rdh5	0	0.0629141	0.0856893	0.329991	0.200073	0.0883599
Crhr2	0.0128754	0.0817473	0.01392	0.187631	0.23111	0.0287
Crispld1	0.0103253	0.032784	0.011163	0.107471	0.0579162	0.0575515
Srsf12	0.0173313	0.036673	0.0562123	0.144326	0.174998	0.0966019
AABR07008066.3	0.16993	0.0898455	0	0.486151	0.285819	0.189343
Plcxd3	0.0729885	0.051463	0.0525883	0.354424	0.163716	0.135561
Cmbl	0.0404703	0	0.175015	0.294884	0.227005	0.270681
Samd14	0.110068	0.155255	0.158608	0.648984	0.246885	0.613326
Gper1	0.1074	0.0757259	0.0386908	0.223504	0.120451	0.398946
Cyyr1	0.00862481	0.0273849	0.0186492	0.0179582	0.0483781	0.115382
Nr0b2	0.206082	0.130811	0.0445415	0.557493	0.369756	0.32152
Marveld2	0.13865	0.0733227	0.164802	0.31733	0.466397	0.417126
Hs3st3a1	0	0.202158	0.165227	0.159063	0.257189	0.681507
Krt19	0.198682	0.245147	0	0.689001	0.408428	0.221359
LOC688553	0.134761	0	0.0728086	0.163567	0.201471	0.250246
Gnaz	0.0372025	0.0983692	0.0200998	0.232219	0.104282	0.124346
Mmp24	0.019467	0.0308888	0.0105177	0.0708849	0.0436614	0.065067
Eps8l1	0.0358841	0.0253013	0.0517091	0.0497799	0.214628	0.0666473
Vps25	1.41361	1.04349	12.4115	14.7985	14.4969	14.2746
LOC100302465	0.00988593	0.0209187	0.0855043	0.174931	0.0332735	0.132254
Map2k6	0.604001	0.114077	0.0932371	0.852766	0.67726	0.745114
Slc16a6	0.0460336	0.178551	0.0497509	0.255456	0.258119	0.239398
Ptpn20	0.0738332	0.046866	0.0638318	0.138267	0.182153	0.181013
Bfsp1	0.0859216	0.113595	0.0928435	0.312864	0.144518	0.335067
AC108546.1	0.188428	0.265786	0.135763	0.522861	0.352184	0.699933
Esyt3	0.077769	0.0514084	0.0945384	0.151693	0.141698	0.292457
Pigc	3.90895	2.86911	4.26046	10.377	9.33293	8.805
Fam217a	0.119494	0.063179	0.0968407	0.186472	0.234461	0.299568
Wdr66	0.0824458	0.0249109	0.0763667	0.19606	0.118871	0.157493
Ddx3y	0.115574	0.106952	0.0936636	0.300596	0.291572	0.209258
Prom1	0.117918	0.0623536	0.0318543	0.19168	0.181801	0.156026
Gp1bb	0.145052	0.204602	0.418041	0.654039	0.542223	0.646604
Pkdrej	0.0646497	0.0379898	0.0155249	0.112099	0.0805467	0.0880502
Arhgef4	0.157359	0.16645	0.102032	0.294685	0.352911	0.350688
Gpr150	0.407161	0.24932	0.301035	0.73571	0.456553	0.979003
Ret	0.147571	0.0693636	0.062012	0.170585	0.257398	0.182699
Ikzf2	0.239457	0.0633253	0.150936	0.311385	0.313251	0.35575
Slc39a5	0.194326	0.0685142	0.104991	0.269547	0.290523	0.234565
AC127756.1	0.271116	0.338886	0.159803	0.666711	0.52511	0.466878
Slc45a3	0.267395	0.148854	0.0608305	0.483163	0.268275	0.266583
Cnih2	0.41351	0.255108	0.0744704	0.60943	0.618207	0.345551
Syn1	0.188037	0.0917914	0.156303	0.270873	0.259507	0.386819
Gramd2	0.55489	0.448788	0.28217	1.08668	0.841786	0.763772
Mybphl	0.241138	0.127517	0.0868549	0.250866	0.225312	0.470194
Camk2n2	1.76533	0.768795	1.12212	1.72853	2.91104	2.8927
Rad51ap2	0.109702	0.11603	0.15242	0.179353	0.175731	0.41912
Spata1	0.171325	0.103559	0.238039	0.229164	0.3019	0.518195
Cyb561	0.273308	0.216793	0.313784	0.764148	0.632065	0.247426
Tmem229a	0.138464	0.019523	0.0698245	0.124849	0.18631	0.15429
Adhfe1	0.185974	0.122937	0.150718	0.338592	0.260652	0.336725
AABR07035802.1	0.234841	0.135483	0.161491	0.355375	0.335157	0.380627
AABR07001634.1	0.187178	0.46194	0.269676	0.584185	0.734564	0.521411
Bdkrb1	0.767924	2.25198	1.35788	0.435764	1.05675	0.661174
Ccl7	138.141	596.964	345.186	135.868	228.115	158.306
Hist1h2ah	1.39836	1.60216	1.00734	0.363627	0.653289	0.908928
Tgm1	0.406836	1.29087	0.278436	0.36682	0.410558	0.166219
Cd8b	0.46761	0.428625	0.303179	0.291877	0.104872	0.173673
Ptges	5.69702	15.566	3.59114	3.49535	6.79752	1.42423
RGD1560289	0.202863	0.339724	0.182671	0.0879326	0.132679	0.113009
Ptgs2	2.838	14.8865	8.35157	1.78676	5.4955	4.58584
RGD1560997	0.886326	0.833258	0.957786	0.614756	0.441778	0.109708
RT1-CE6	6.61547	1.43736	2.96479	1.62725	1.0638	2.08568
Ccl2	400.586	1967.39	1427.06	338.239	758.874	524.516
Rn60_5_0825.2	0.836461	1.03216	1.05449	0.217512	0.78156	0.233024
Maob	0.128066	0.367684	0.355869	0.171301	0.102574	0.0815467
Slamf7	0.858478	2.31693	0.447833	0.615959	0.564297	0.329833
Cdc42ep2	13.0748	2.76578	1.15929	2.92977	2.06755	1.9425
Ntn3	0.207469	0.119692	0.122287	0.0981093	0.0846074	0
Slco4a1	7.53987	9.31469	8.08087	3.56843	4.10593	2.46186
Ccl20	1.92027	12.8015	7.86005	1.81615	4.89358	2.46383
Cxcl3	4.69773	14.0622	4.82099	2.79711	4.40618	2.33741
Kcnj12	0.0433266	0.16039	0.093634	0.0112706	0.0485872	0.0603419
Gpr68	0.160993	0.264894	0.251294	0.0930505	0.120357	0.0598036
AABR07071659.2	0.988373	1.0454	0.712023	0.411311	0.664992	0
Cnnm1	0.77508	0.610477	0.409874	0.291657	0.27736	0.128631
Pkhd1l1	0.0441015	0.0789387	0.0916507	0.0141164	0.0342373	0.0340201
Ccno	0.291078	0.384828	0.157264	0.100931	0.135986	0.0810896
Tfpi2	12.3217	55.9828	27.6416	9.23912	17.8165	9.16245
Ascl2	0.145647	0.677858	0.251835	0.242472	0.0980003	0.0649037
Zc2hc1c	0.139339	0.171926	0.225847	0.0724672	0.052072	0.0776354
Ak7	0.140472	0.0675362	0.0551987	0.0265767	0.0429605	0.0284519
Pspn	0.680571	0.719827	1.15571	0.40458	0.109067	0.433358
Galnt13	0.251628	0.0887172	0.158608	0.10907	0.0705386	0
Myl6b	1.17426	0.698627	0.475823	0.229015	0.493771	0.0817537
Plekhs1	0.14481	0.287176	0.254274	0.131823	0.0608919	0.0403275
Rassf10	0.150234	0.254242	0.194825	0.0937699	0.0673793	0.033474
Soat2	0.104403	0.176683	0.135391	0.0868934	0	0.0465247
Tifab	0.101751	0.179396	0.403216	0.141154	0	0.0755768
Aldh3a1	1.64768	2.29597	3.58928	1.00675	0.615843	0.728545
Il6	3.11144	14.9249	2.74667	1.50451	3.78367	1.17193
AABR07005593.1	0.389518	0.706225	0.571251	0.231571	0.187189	0.0930116
Angptl4	0.436616	6.56764	2.01827	0.378511	1.79506	0.59459
Fmo1	0.0744817	0.126046	0.0643924	0.0310033	0.0501159	0
Lrrtm4	0.135173	0.0476653	0.0811505	0.0468696	0.0336786	0
Nwd1	0.058864	0.0622561	0.116611	0.0612385	0.0110048	0
Cxcl6	0.648577	8.67916	1.37125	0.469384	2.30823	0.439879
AABR07032657.1	1.71521	1.81412	0.926697	0.356944	0	0.955527
Scml4	0.0396531	0.0503311	0.0342817	0.00825286	0.0266811	0
AABR07016578.1	0.330862	0.349978	0.357555	0.137723	0	0.14744
Il2rb	0.0415197	0.0548923	0.0336484	0.0108006	0.0232743	0
Klrb1b	0.0398671	0.0590351	0.0517001	0.0248834	0	0.00888287
Cxcl1	9.00083	270.637	96.195	8.59224	50.1855	18.2399
RGD1307391	0.0774239	0.122836	0.0139435	0.0134269	0	0.0287486
AABR07001929.1	0.219646	0.116131	0.296676	0	0	0.122337
Spint1	0.11097	0.0260779	0.0799444	0	0.0276484	0.0137357
Gsta5	0.309709	0.0935782	0.382497	0	0.0992136	0.0492892
AABR07012775.1	0.663663	0.601681	0.409819	0.0986585	0.106357	0.10562
Paqr5	0.222732	0.31409	0.120338	0.0514881	0.0416256	0.0275679
Cxcl9	0.122205	0.129258	0.0990372	0.0635784	0	0
Inhbe	0.0336489	0.0711823	0.109079	0.0175063	0	0.0187415
Agmat	0.092439	0.0978005	0.233108	0	0	0.0686599
Camk1g	0	0.203945	0.0833442	0	0.0216296	0.0214797
Plk5	0	0.185036	0.141793	0	0	0.0487243
AABR07044454.1	0.32776	0.198117	0.303593	0	0.104996	0
Kng1l1	0.0618311	0.0762913	0.0556769	0	0.0115595	0.0114794
Fat2	0.00701535	0.0222589	0.00379026	0	0	0.00390735
AABR07072539.1	0.103494	0	0.0745546	0	0.0193485	0
Siah3	0	0.240097	0.306602	0.0590484	0	0
Guca2a	0.201745	0.106667	0.217998	0	0.0565753	0
Ppapdc1a	0.221238	0.156005	0	0.0383672	0	0
Angptl6	0.145832	0.0616901	0.0945585	0.0303516	0	0
LOC56764	0.0704071	0.198598	0	0	0	0.0261478
Rn60_10_0890.5	23.2259	22.0195	0.0337786	3.44724	0.701041	0.243828
Csf3	0.0354271	2.43681	0.0383015	0	0.158999	0.0789696
AABR07027371.1	0.119697	0.090435	0	0	0.0191824	0
Csf2	0	0.878606	0.448849	0	0.116486	0
Cyp1a1	3.05534	2.57054	2.32615	0.180598	0.291974	0.193424
Elf5	0.1202	0.635656	0.259767	0	0.0674152	0
Clca2	0.0661476	0.0583016	0.0714765	0	0.0123665	0
Plekhd1	0.0817546	0.0288168	0.0736174	0	0	0
Rorb	0.0715007	0.0189019	0.135207	0	0	0
Wfdc18	0.104027	0.660481	0.449869	0	0	0
Vwc2	0.0680609	0.0575976	0.0147103	0	0	0
Tnfsf4	0.102567	0	0.166245	0	0	0
Dnajb13	0.0813071	0.0214943	0.0658929	0	0	0
Krt17	0.0715286	0	0.077291	0	0	0
Gkn2	0.254423	0.201849	0	0	0	0
Slc14a1	0.0461191	0.012192	0.0124586	0	0	0
Bglap	0.0939874	0.397861	0.101613	0	0	0
Ankrd35	0.0270503	0.0715254	0	0	0	0
AABR07067457.1	0.222853	0.235653	0.240806	0	0	0
Pik3c2g	0.0153833	0.0162669	0.0166226	0	0	0
LOC100911068	0.01586	0.0671373	0.0342936	0	0	0
ENSRNOG00000056537	0.027933	0.0147687	0.045275	0	0	0
Lipn	0.0307785	0.0108507	0.0332639	0	0	0
AABR07044001.4	0	0.0534897	0.0728533	0	0	0
Fam170b	0	0	0	0.111568	0.0601206	0.209138
AABR07055191.1	0	0	0	0.171349	0.18472	0.305906
Rxrg	0	0	0	0.0149708	0.0483998	0.144278
Slc28a3	0	0	0	0.134103	0	0.102584
AABR07005837.2	0	0	0	0.379314	0.163513	0.243785
Mybph	0	0	0	0.031278	0.05056	0.0669877
Galntl5	0	0	0	0.0620874	0.100362	0.132972
Ints1	0	0	0	0.0758286	0.122608	0
Cracr2a	0	0	0	0	0.330239	0.218769
Clvs2	0	0	0	0.087297	0.0627282	0.093523
AABR07062694.1	0	0	0	0.0650124	0.0100137	0.00994431
Oprd1	0	0	0	0.134479	0	0.144045
RGD1309036	0	0	0	0.198013	0.12806	0
AABR07062775.1	0	0	0	0.177925	0	0.19058
Ckmt2	0	0	0	0.11396	0	0.20345
Rho	0	0	0	0.0957169	0.0344075	0.068338
Nell1	0	0	0	0.0824539	0.0355438	0
Pdzd9	0	0	0	0.0500544	0.0539602	0.0178684
Apcdd1l	0	0	0	0.0410793	0.0442612	0.0439779
Fn3k	0	0	0	0.350824	0	0.150263
RGD1308112	0	0	0	0.0807104	0.0217579	0.0216071
LOC685081	0	0	0	0.0613282	0.0330569	0.131346
RGD1304770	0	0	0	0.021057	0.0907763	0.0450856
AC117065.1	0	0	0	0.060319	0	0.387519
Nkapl	0	0	0	0.122309	0.032972	0.0654869
AABR07071917.1	0	0	0	0.0704912	0.0759512	0.075465
AABR07072264.3	0	0	0	0.0606484	0	0.048726
AABR07049503.1	0	0	0	0.287851	0.232714	0

## Sheet: S2-H VS S2-N
group	2-H	2-H	2-H	2-N	2-N	2-N
gene name	2-H1	2-H2	2-H3	2-N1	2-N2	2-N3
LOC100910255	0.00441357	0.0048639	0.00490295	3.05159	0.0099944	0.0141304
Slc16a6	0.109649	0.0345298	0.069614	0.335194	0.230631	0.200646
Smpd3	0.0743275	0.122893	0.237405	0.209275	0.389335	0.436351
RGD1310495	0.254229	0.4804	0.242107	0.695368	1.23402	0.736575
Gstt3	0.0523793	0	0	0.147452	0.0593057	0.195655
Thegl	0.10543	0.0387357	0.0390467	0.296864	0.0796148	0.225085
Serpinb2	1.21375	0.550913	0.978299	0.214421	0.21563	0.711293
Cxcl1	10.0954	1.33537	3.25254	2.50138	1.31492	2.20903
Faslg	0	0	0.0639951	0.194604	0.163097	0.0922176
Slc6a4	0	0	0.0316081	0.192235	0.0322157	0.0455475
Lct	0	0	0	0.0344223	0.025959	0
Lvrn	0.168587	0.309731	0.31217	0.0474665	0.159126	0.134959
Map3k19	0.0106367	0	0.0118162	0.0598866	0.0240866	0.0567651
Dlx4	0.0573953	0.0632516	0.127519	0	0	0
Bfsp1	0.0438541	0.120822	0	0.0493812	0.273143	0.304213
Frmd3	0.0230857	0.254438	0.179518	0.259952	0.444433	0.394199
Dnase1	0.0724783	0.0399368	0.281802	0.0408065	0	0
Myo5c	0.00774238	0	0	0.0348727	0.00876621	0.0495757
Capn3	0	0	0.0105553	0.0213985	0.0215164	0.0608411
Ccm2l	0	0	0	0.145919	0.14676	0.172891
Adra1a	0	0.202158	0.0764081	0.0258168	0	0
LOC361108	0	0.827659	0	0	0	0
Clcnkb	0.0310106	0	0	0.122216	0.0877963	0.0330887
Ddit4l2	1.77765	4.14949	3.89176	0.883287	1.77649	1.11614
Syn1	0.147629	0.0650897	0.147611	0.349179	0.3177	0.220622
Cel	0.20402	0.299842	0.226642	0.178702	0.0256694	0.0967875
Tmod2	1.30818	1.87073	1.25697	3.02634	2.80312	3.39662
Oprd1	0.0329912	0	0.109948	0.185746	0.224161	0.211248
Pard6b	0.567596	0.656948	0.283766	0.31963	0.289286	0.136311
Atp1b2	0.0932019	0.119868	0.224348	0.0349886	0.0175907	0.0331547
Irx3	0.686073	0.427437	0.4308	0.201558	0.168925	0.254723
Rem2	0	0.0284632	0.114767	0.116332	0.146246	0.24807
Grin1	0.0146409	0.0242022	0.00813217	0	0	0
Perp	0	0	0.0276381	0.0560302	0.225384	0.0530934
Spint1	0.0377613	0.0416143	0.0978795	0.0141735	0	0
Slc6a12	4.49265	1.45944	2.24772	1.85974	0.741347	1.11154
Snai3	0	0	0.0260572	0.158476	0.0531163	0.0500564
Paqr5	0.0757754	0.0139201	0.0561276	0.0142233	0	0
Tmem25	0.110455	0.121766	0.0613612	0.311012	0.271053	0.29476
Amhr2	0	0	0	0.0400459	0	0.0948963
Adgrg1	0.394888	0.4797	0.34918	0.807785	1.11354	0.533327
Hp	0.514947	1.1789	1.62829	0.446105	0.269183	0.803366
Ankdd1a	0.0712268	0	0	0.187142	0.215082	0.228038
Gas2	0.08572	0.107991	0.0272109	0.289625	0.235781	0.182994
Fbp1	0.128929	0.248746	0.214891	0	0.0365037	0
Msx2	0.283851	0.156459	0.157688	0.0532797	0.0535732	0.0252564
Cacnb2	0.0338022	0.0558769	0.0187751	0.133219	0.0956998	0.162331
Dlk2	0	0	0.108117	0.292243	0.183696	0.138498
Ccdc24	0	0	0	0.045914	0.115441	0.0435074
Bglap	0	0	0	0.108091	0.760917	0
Disc1	0.0920788	0.243607	0.143233	0.248891	0.667471	0.412819
Tssk4	0.101923	0.0748815	0	0.57388	0.0769337	0.290081
Tgm1	0.193777	0.183084	0.230657	0	0.0627111	0.0590985
Phlda2	0.407344	0.449021	0.50908	0.286712	0	0.163038
Slc17a7	0	0	0	0.0960883	0.0161029	0.0455336
Ovol1	0.0243231	0	0.0472969	0	0	0
Fgf21	0.074559	0.657418	0.414131	0.0839559	0	0
Lsr	0.0195274	0.0645595	0.130156	0.0219885	0	0
Hist1h2af	0.594647	1.04886	0.52857	2.00931	2.82875	1.39649
Zfp711	0.119823	0.187111	0.0554711	0.0449821	0.056549	0.0106615
Esyt3	0.248042	0.382786	0.297614	0.290533	0.831563	0.762526
Cep70	0.338266	0.271167	0.136663	0.709987	0.452765	0.459533
Rimbp2	0	0	0	0.0287904	0	0.0218306
Sp6	0.0468657	0.0258238	0.0520622	0.316634	0.106153	0.0750221
Fer1l5	0.0290427	0.016007	0.00806774	0.106311	0.0328997	0.0465028
Shisa3	0	0	0	0	0.0965248	0.0682175
Tmem116	0.175844	0.0775297	0	0.316872	0.199177	0.488023
LOC691215	0.125219	0.0919973	0.139104	0	0	0
Tppp	0.190301	0.0524361	0.052857	0	0.0269366	0.0253978
Slc51b	0	0	0	0.276327	0.27785	0.392832
Nfasc	0.00445733	0.0147364	0	0.0451719	0.0201922	0.0142705
Ccl24	0	0	0	0	0.152282	0.071764
-	0	0	0	0.0191211	0.0192264	0.108732
Ttc21a	0.00791811	0.0785432	0.105544	0.187246	0.206235	0.177462
LOC682512	0.193576	0.31999	0.21504	0	0	0
AC097183.1	0.11091	0.366742	0.246415	0.437109	0.690797	0.710234
P2rx2	0	0.0597765	0.020082	0	0	0
Calr4	0.0634308	0.0349515	0.0352321	0.357126	0	0.372334
Cd86	0.6955	0.47352	0.249978	0.207336	0.23169	0.240184
Ecscr	0.424916	0.234215	0.393385	0.757742	0.761999	1.09613
Abca17	0	0	0	0.0791287	0.0198912	0
Slc44a5	0.0398015	0.0219368	0.0663386	0	0.011269	0
Klhdc4	2.18422	1.12362	0	0	0	0
Chrm2	0.127998	0.376243	0.687323	0.120129	0.120815	0.227711
Lmo3	0	0	0.065296	0	0.133125	0.439118
Nat8l	0.399138	0.235691	0.300902	0.160538	0.145296	0.10651
AABR07020847.1	0.177526	0.19564	0	0.466434	0.536072	0.315801
Chrm3	0.0392735	0.0288538	0.0290854	0	0	0
LOC102553099	0	0	0.100839	0.817714	0.102777	0.193713
LOC100910772	0	0	0.0347837	0.246807	0	0.133674
Afmid	0.279225	0.225709	0.310206	0.712794	1.07522	0.337777
Myl4	2.11662	2.722	4.18043	0.860786	1.06547	2.57303
Rn60_10_0890.5	0	0.351698	0	0	0	0
G6pc	0.0569019	0.0627203	0.0252895	0	0	0
Nwd1	0.0600781	0.022073	0.0667507	0	0	0.0320628
AABR07030890.1	0.206994	0.182528	0.27599	0	0.140648	0
B4galnt4	0	0.0126862	0.038364	0.0907369	0.143399	0.024566
Slco4a1	4.44706	1.30373	2.13741	1.65174	0.76801	0.84164
AABR07065049.2	0.101849	0.112241	0	1.37622	0.115317	0.434806
Xkrx	0.0219202	0.0322091	0.105512	0.00822763	0.0248189	0.00780035
AABR07005593.1	0.141978	0.125197	0.0631009	0	0	0.060609
AABR07012065.1	0	0	0	0.0422136	0.169828	0.080002
Fam73a	0.395705	0.327129	0.412131	0.306372	0.0840165	0.105596
AABR07044049.1	0.0306522	0.0168941	0.0425742	0.0949408	0.0954815	0.0736198
Ccdc64	0.0123445	0	0	0.111202	0.0698985	0.092222
AABR07068590.1	0	0	0	0	0.29543	0.111342
Tmem52b	0.221258	0.182927	0.430185	0.145358	0.1253	0.118082
Akap3	0	0.0292885	0	0.0448894	0.135426	0.070916
Otx1	0	0	0	0.21596	0	0.153507
AABR07010121.1	0.370193	0.30605	0.205671	0	0	0.0988251
Zdhhc23	0.0335716	0.0369971	0.0372941	0	0	0
RT1-CE6	0.471072	0.634665	0.494284	1.03162	0.978148	2.29069

## Sheet: S3-H VS S3-N
group	3-H	3-H	3-H	3-N	3-N	3-N
gene name	3-H1	3-H2	3-H3	3-N1	3-N2	3-N3
LOC100910255	0.00992894	0.0200057	0.0161651	4.23496	0.00993304	0.00952168
RGD1559575	0	0.0192637	0	0.0559163	0.114794	0.146714
Smpd3	0.0209039	0.0105297	0.0255228	0.285309	0.209166	0.421014
LOC684238	0.0152549	0	0	0.148729	0.0763136	0
Cer1	0	0.0311252	0	0.0903466	0.154555	0.148154
Syt8	0	0	0.0333971	0.119945	0.287297	0
Pdzd7	0	0.013559	0.0109586	0.0656089	0.0942706	0.116167
-	0	0	0.137228	0.164284	0.674594	0.646498
AABR07049148.1	0.0362896	0	0	0.0707476	0.0363224	0.278443
C2	0.013959	0	0.0340869	0.0272135	0.0419013	0.428406
AABR07012023.1	0	0.123774	0	0.359276	0.12297	0.589156
AABR07062833.1	0	0	0.0601336	0.107985	0.184728	0.177078
Prtg	0	0.0199605	0	0.00965649	0.0991253	0.0380006
Mfsd4	0.0136192	0.0274411	0	0.106217	0.0817622	0.078376
Cyp2d4	0	0.0602332	0.0486812	0.320594	0.179468	0.200689
RGD1307391	0.029633	0	0.012064	0.101112	0.0889501	0.0710506
Fam198a	0.121609	0.122538	0.118802	1.32786	0.365037	0.396545
Svip	0	0	0.145102	0.217232	0.356734	0.256449
Bfsp1	0.024664	0	0.0401643	0.120232	0.197442	0.0473047
Asgr1	0.0314872	0	0.0512756	0.122801	0.252064	0.0906017
Ccer2	0.191213	0	0	0.497096	0.382647	0.1834
Ccdc27	0.0536842	0.0270419	0	0.0784941	0.134279	0.231682
Ntf3	0.028286	0	0.0921035	0.193032	0.169814	0.298423
Fgd2	0.0189833	0	0.0618124	0.0555126	0.0949649	0.291309
LOC100362109	0.0230176	0	0	0.0336551	0.0575734	0.0331155
LOC103691893	0.174407	0	0	0.425098	0.349044	0.167253
Hsd11b2	0.0282253	0	0.0459637	0.0825389	0.112975	0.189486
Slc27a6	0	0.017524	0.0283263	0.10175	0.0348034	0.100102
Kcnk15	0.0440953	0.0222118	0	0.0644738	0.15443	0.105727
Btbd16	0.027734	0	0.0451637	0.108163	0.1665	0.0798022
Car4	0	0.0406875	0.0657683	0.236245	0.161654	0.11621
Batf	0.0524264	0	0.170708	0.357774	0.209844	0.502809
Shbg	0.104957	0.0352462	0.0569729	0.238754	0.280071	0.402642
Megf10	0.0207213	0.027834	0	0.0538689	0.158959	0.0132476
Adra1d	0.0535294	0.0179759	0	0.226141	0.035701	0.068445
LOC680693	0.114188	0.0575191	0	0.111307	0.171381	0.492797
Rgs22	0.0205485	0.0103507	0.0083656	0.0400698	0.0822482	0.049269
Megf6	0.0102883	0.0155474	0.00418853	0.0752251	0.0205902	0.0345346
Spta1	0.052788	0.0199404	0.0429662	0.218693	0.138638	0.126554
Rn60_2_1764.2	0.14341	0.144478	0.272423	0.65245	0.76531	0.91694
Slc8a3	0.0597814	0.0240905	0	0.104902	0.0837461	0.149073
Mpv17l	0	0.203359	0	0.344383	0.15148	0.290412
Epb42	0.0263577	0	0.0429124	0.0770904	0.1055	0.0758421
LOC681458	0.0146066	0.0441459	0.0237862	0.142408	0.146155	0.0140142
Tsga10	0.0737241	0.0928591	0.0300141	0.143745	0.239747	0.335851
Gyltl1b	0.0438929	0.0221098	0.0535915	0.106984	0.175687	0.147334
RGD1562963	0.0665195	0.134029	0.0541621	0.356689	0.29951	0.255195
Sprn	0.355295	0.119313	0.0964305	0.577329	0.829539	0.567925
Tc2n	0.0691284	0.0928573	0.0375242	0.314502	0.1614	0.19889
AC099449.1	0	0.210219	0.297288	0.508599	0.417606	0.700421
Slc23a3	0.148892	0.1	0.101008	0.290317	0.297956	0.52359
Aqp11	0.325887	0.123103	0.232119	0.913327	0.652085	0.546882
Hist3h3	0.639704	0	0.208346	0.873108	0.896144	0.858911
Tnfrsf4	0.310228	0.104179	0.252557	0.856947	0.517362	0.595055
Prrt1	0.0299026	0.0602503	0.0243475	0.116606	0.0598445	0.157739
MGC109340	0.10392	0.104694	0.281997	0.337726	0.623882	0.465102
Map2k6	0.24771	0.249554	0.100817	0.410511	0.867416	0.451334
Trim29	0.0762978	0.0658864	0.0266125	0.0743725	0.305328	0.104522
Clcn4	0.157811	0.146757	0.0889326	0.355021	0.473684	0.291042
Arhgef37	0.0422806	0	0.0344167	0.0883141	0.0604292	0.0695039
Slc16a6	0.158614	0.0532592	0.0143482	0.30924	0.24686	0.0845035
Adamts15	0.919241	0.838758	0.578852	2.71372	1.77004	2.11241
Drp2	0.110834	0.133997	0.0721795	0.295332	0.310502	0.283444
Zbtb8b	0.0195043	0.0982667	0.031762	0.114091	0.136615	0.168348
Magee2	0.098981	0.149601	0.120871	0.289497	0.420928	0.308528
Ptges	0.209664	0.633756	0.0682857	1.14465	0.881137	0.482592
Fam65b	0.106972	0.0134694	0.0653065	0.143383	0.107029	0.256454
Dhrs3	3.46536	2.52292	1.68839	8.45783	3.97336	8.51445
Ccdc37	0.566573	0.674587	0.31445	1.45609	1.15949	1.60532
Apol3	0.168754	0.136008	0.0274808	0.329055	0.439024	0.129466
AC127756.1	0.254738	0.285147	0.0921531	0.386273	0.45309	0.841444
Edar	0.0576575	0.0871442	0.199478	0.281054	0.115391	0.511503
Klhdc9	0.14454	0.145644	0.141204	0.281841	0.520644	0.332694
Prkcg	0.101742	0.0512497	0.124236	0.380234	0.135745	0.211423
Sh2d2a	0.162212	0.136209	0.220088	0.368995	0.432823	0.544517
Tnfsf13b	0.0875422	0.0587959	0.0356285	0.14225	0.131389	0.1959
Smtnl2	0.0215419	0.130234	0.175367	0.462044	0.150887	0.227271
Ablim2	0.069262	0.195404	0.022558	0.202569	0.249487	0.279
LOC691083	0.366834	0.32611	0.245914	0.967649	0.734077	0.682912
Strip2	0.20819	0.146824	0.220299	0.608849	0.333271	0.519099
AABR07042904.1	0.0589503	0.103945	0.107975	0.258624	0.206455	0.212017
Synpo2	0.152171	0.19164	0.144512	0.420299	0.406	0.38915
Ednra	0.154594	0.0819747	0.125844	0.38074	0.138399	0.382351
Arhgap20	0.772419	0.985728	1.35533	1.79044	1.89486	4.01105
Camk2a	0.189371	0.19078	0.154149	0.580169	0.270657	0.466965
Ribc1	0.362678	0.116262	0.161035	0.466049	0.494819	0.616557
Rab25	0.0971972	0.146881	0.356059	0.663304	0.486282	0.326259
Clmn	0.190126	0.180286	0.227601	0.337986	0.537117	0.579178
Adcy10	0.0960244	0.0537486	0.0694747	0.166415	0.160116	0.204633
Spns2	0.135923	0.123243	0.121707	0.159003	0.421569	0.33891
Kcnn1	0.273052	0.145641	0.339949	0.391454	0.739253	0.677757
RGD1565367	0.34371	0.106536	0.129136	0.695894	0.264534	0.405695
Adamts3	0.401139	0.340997	0.265314	1.08762	0.489153	0.709285
Slc6a7	0.222011	0.134204	0.102406	0.404001	0.303576	0.326468
-	0.767645	0.38668	1.04154	2.3699	1.53618	0.981663
Htr2b	0.373149	0.590779	0.694274	0.961379	1.30672	1.40585
Zfp964	0.61385	0.721551	0.471917	1.52929	1.22838	1.24281
Slc12a8	0.0816517	0.148083	0.159535	0.270657	0.179748	0.407219
Tekt1	0.146882	0.406968	0.4185	1.0382	0.808328	0.281748
Rad9b	0.304509	0.276102	0.347013	0.801466	0.639806	0.584038
Cdhr2	0.0802192	0.107768	0.130613	0.247655	0.240796	0.205168
Mycbpap	0.252415	0.113027	0.308205	0.355434	0.392856	0.712771
Cgn	0.0929505	0.187285	0.0420337	0.241627	0.278993	0.178276
Soga3	0.0742707	0.130959	0.105814	0.199126	0.29726	0.178078
Dixdc1	1.52149	1.87646	1.08903	3.47789	3.64825	2.59957
Fam13c	0.438412	0.302229	0.338092	0.809804	0.507909	1.01794
Gpr88	0.227812	0.0765107	0.144234	0.567548	0.253265	0.145649
Osm	0.0951224	0.0958491	0.154874	0.296765	0.171319	0.273689
Nudt6	0.443613	0.65008	0.262608	0.589686	1.00872	1.27627
Pik3ip1	3.18076	2.36027	1.62793	6.36864	4.80226	3.92713
Ano4	0.327875	0.0639385	0.215241	0.443361	0.285726	0.547726
AABR07012047.1	0.516016	0.708947	0.598249	1.2195	1.18905	1.39464
Cgnl1	0.173455	0.0714884	0.0962678	0.399663	0.181433	0.128535
Acacb	0.0408338	0.0457081	0.0738627	0.0751889	0.136181	0.121827
Mx1	0.237951	0.15982	0.245347	0.37115	0.47616	0.486819
LOC497899	0.910794	0.821039	0.74141	1.21502	1.72667	2.16069
Cdnf	0.17255	0.251104	0.249698	0.635428	0.421992	0.330944
Daw1	0.345356	0.3163	0.51113	0.918181	0.785294	0.692501
Dtna	0.1367	0.0423716	0.0684745	0.174268	0.15781	0.171432
Mfrp	0.601083	0.251096	0.548953	0.986135	0.616069	1.23725
Mettl15	0.219742	0.261635	0.211395	0.408952	0.519658	0.469351
Oas1k	0.0292497	0.0589421	0.0892931	0.0926767	0.139019	0.126238
RGD1560207	0.148875	0.168729	0.151476	0.326529	0.297891	0.321225
Abcb9	0.0871005	0.0780001	0.0472673	0.169814	0.106512	0.148496
Gpr135	0.727177	0.848331	0.591941	0.373121	0.268061	0.440445
Grem2	0.565609	0.413144	0.471928	0.330831	0.297108	0.0949213
Rgs2	39.0771	34.0595	50.8948	26.6955	21.3977	12.8404
Oscar	0.36285	0.496121	0.25318	0.227383	0.103733	0.198848
Olr1	121.33	96.3515	172.848	74.7928	57.1439	54.0779
Cxcr4	0.964128	0.903181	0.674667	0.577127	0.338474	0.291985
Esrp2	1.44202	1.38618	1.37844	0.799602	0.595643	0.583617
Nptx2	0.607001	0.555931	0.561478	0.349653	0.38648	0.0529138
Csrnp1	9.04195	9.6757	19.3196	7.6985	7.42405	2.13478
Rgs16	14.3537	15.0423	23.8724	9.99476	10.1512	3.89197
Gnpnat1	21.6292	8.33603	18.8043	8.33661	6.36161	7.13607
Chrnb1	0.300369	0.488854	0.470201	0.112625	0.18495	0.265892
Slc6a12	0.502105	0.404697	1.04905	0.326316	0.066987	0.465468
Rn60_1_0435.2	2.51356	2.18478	1.88558	0.768752	1.47936	0.614454
AABR07030603.1	3.00494	2.1866	1.6308	0.813759	0.835088	1.28084
Il6	3.67355	1.77448	5.81683	2.20756	1.25872	1.35129
Tnfsf15	2.00143	1.41147	7.94229	1.51209	0.851068	2.44723
Plcd4	0.268575	0.126278	0.145751	0.139634	0.0179201	0.068678
Serpinb2	1.0978	1.29486	2.04881	0.495941	0.723335	0.616264
Foxn1	0.259288	0.593694	0.441303	0.252768	0.188681	0.0904112
Il11	2.00805	1.73749	4.61528	1.40483	1.22911	0.792951
Tgm1	0.124584	0.172573	0.190141	0.0303563	0.0623255	0.104534
Lef1	0.265182	0.780959	0.448319	0.139196	0.285737	0.176053
Tfpi2	12.929	6.73244	22.9643	5.89119	4.36039	6.68708
Plag1	0.142005	0.206654	0.0899087	0.0769079	0.0631483	0.0302591
Ch25h	4.95504	2.89869	25.1116	6.07698	2.79867	3.90883
LOC500227	0.164324	0.220756	0.245253	0.0800885	0.109621	0.0525279
Crct1	0.867717	2.62287	1.41278	0.845987	0.868161	0.166506
Cldn3	1.5719	1.43972	0.66885	0.522385	0.714888	0.171303
Socs1	0.879525	0.746219	0.678267	0.225646	0.463167	0.177559
Slco4a1	0.869367	1.001	1.03984	0.484274	0.426042	0.170147
Plekhs1	0.540426	0.586347	0.642946	0.222895	0.291158	0.139531
Ccdc94	0.333865	0.560638	0.770049	0.379733	0.0556944	0.160111
Trpm3	0.120245	0.0969135	0.0522013	0.0547023	0.0320843	0.00769074
Adrb1	0.600564	1.28577	0.763867	0.256136	0.450655	0.215996
LOC100362344	0.361444	0.728269	0.367759	0.0880698	0.316422	0.086644
Npas4	0.42753	0.258436	1.18328	0.166709	0.19249	0.266513
Lag3	0.197287	0.170366	0.229406	0.109902	0.0845884	0
LOC498675	0.411261	0.776862	0.376594	0.150313	0.257139	0.0985862
Fgf11	0.233723	0.108684	0.10245	0.0525709	0.0359695	0.0517282
Resp18	0.296884	0.0854437	0.552356	0.082672	0.0424445	0.162667
Arid4b	0.157151	0.129537	0.0348832	0.0278493	0	0.0685027
Trim9	0.0427625	0.215432	0.0812323	0.0277889	0.0427872	0.027339
Taf9	7.81113	2.08091	7.82567	1.61079	1.81604	1.57262
Nr4a3	4.06912	4.50957	16.055	1.96006	3.00557	1.79048
Syt1	0.0408179	0.0514122	0.0664546	0	0	0.0391437
Ptch2	0.0860017	0.0649841	0.0700002	0.0104776	0.0322653	0.010313
Gp1bb	0.666373	1.06297	0.316437	0.108251	0.166676	0.212996
Rims1	0.0228757	0.0460995	0.0248289	0.00743281	0	0.014625
Krt23	0.207185	0.459242	0.371069	0	0.0829084	0.15895
Sncg	0.286488	0.0412258	0.233203	0	0.122834	0
Hcar2	0.485584	0.244623	0.395264	0.0946568	0.0485976	0.0931243
Xkr4	0.135246	0.0817517	0.0660521	0.0263666	0	0.0259523
C1qc	0.33774	0.291653	0.392726	0.0940489	0	0.0925263
Nup210l	0.0186269	0.0375311	0.0454925	0	0.00932186	0.00893575
Sncaip	0.153572	0.0110503	0.0267846	0.0106918	0	0.0210375
Nkx6-1	0.0981955	0.214373	0.173195	0.0478587	0.0163807	0.0157022
LOC501233	0.0202635	0.0408352	0.0219936	0	0	0.0129549
Ccdc103	0.0550038	0.332534	0.313458	0.107231	0	0
Slc38a5	0.194473	0.167936	0	0.0541539	0	0
Cd101	0.1494	0.060199	0.121611	0	0.0448415	0
Chrdl2	0.292524	0.163737	0.0529235	0.063358	0	0
Perm1	0.0136192	0.0548823	0.0443461	0	0.0136315	0
LOC100364027	0.0577208	0.038767	0.0626492	0	0	0.01846
Impg2	0.0240658	0.0484898	0.0293833	0.0117292	0	0
Tmie	0.0404645	0.0203829	0.1153	0	0.0202506	0
Klhdc8a	0.0657501	0.0828156	0.0267678	0.0160227	0	0
Vgll2	0	0.265738	0.214696	0.0321358	0	0
Trim72	0.0439847	0.155114	0.107424	0	0	0
LOC100911963	0.257007	0	0.209223	0	0	0
Casz1	0.0678218	0.0292788	0	0	0	0
Lhx4	0.180235	0.0907885	0.0733764	0	0	0
Prss56	0.0288288	0.0871301	0.0938708	0	0	0
C4bpb	0	0.285883	0.115472	0	0	0
Muc13	0	0.0453263	0.0366247	0	0	0
Adrb3	0.0242657	0.0488926	0.0790126	0	0	0
Rn60_X_0713.5	0.0622292	0.125385	0.202628	0	0	0
Tmem63c	0.0314449	0.00791974	0.0128017	0	0	0
Siglec5	0.116637	0	0.0316563	0	0	0
Cdh1	0.0119617	0.0120508	0.0486887	0	0	0
Esrrb	0.201934	0.0406875	0.0328841	0	0	0
Ankrd24	0.0303426	0.0305684	0.0247058	0	0	0
AABR07066798.1	0.132787	0.267551	0.324256	0	0	0
Lad1	0.0237935	0.0719119	0.0387467	0	0	0
Hs3st6	0.0854325	0.129103	0.0347808	0	0	0
Ppp1r42	0	0	0	0.0962566	0.197627	0.378839
Wnt10b	0	0	0	0.0917982	0.0706544	0.0902898
RT1-M2	0	0	0	0.181806	0.139931	0.0894093
AABR07000385.2	0	0	0	0.140549	0.0240372	0
Bcl11a	0	0	0	0.0119815	0.0368962	0.0471499
AABR07068590.1	0	0	0	0.114412	0.0587402	0.281427
Slc44a4	0	0	0	0	0.0937938	0.0898874
AABR07002885.1	0	0	0	0.0604235	0.0620133	0
Wnt3	0	0	0	0.0347385	0.0356526	0.0512724
Emid1	0	0	0	0.0960462	0.0657157	0.0629942
Plac8l1	0	0	0	0.368814	0.126152	0
Yipf7	0	0	0	0.157389	0	0.11612
Fgf14	0	0	0	0.20668	0.282894	0
Chd5	0	0	0	0.013623	0.0349572	0
Ppp2r2c	0	0	0	0	0.147369	0.0565007
Ddx43	0	0	0	0.0264073	0.0542044	0.077952
Best2	0	0	0	0.0255517	0.0262369	0.100552
Rab19	0	0	0	0.0242807	0.0249319	0.0955506
Myo16	0	0	0	0.0424438	0.00726248	0

## Sheet: S4-H VS S4-N
group	4-H	4-H	4-H	4-N	4-N	4-N
gene name	4-H1	4-H2	4-H3	4-N1	4-N2	4-N3
Rn60_10_0890.5	0.105087	0	0.174094	30.775	34.7373	1.0244
Rps20	23.2892	20.1409	13.2872	10.0714	6.72039	10.1119
Drp2	0.122594	0.109219	0.100336	0.272541	0.252826	0.27356
Tmie	0	0	0	0.0910118	0.0710049	0.109241
Fam198a	0.0712086	0.112357	0.0471784	0.218816	0.341449	0.393983
Abhd3	0.375783	0.635241	0.533521	0.915502	1.37545	1.16676
Slc16a6	0.0515928	0.0976812	0.119654	0.269516	0.108238	0.434966
Smpd3	0.112213	0.125536	0.162213	0.263301	0.265948	0.386986
Fgd2	0.0185262	0.0876954	0.0184115	0.187866	0.133243	0.058566
Phkg1	0.32878	0.0933635	0.0653425	0.454593	0.620692	0.233845
Srrm4	0	0	0	0.0785846	0.102183	0
Hoxd13	0.289366	0.117391	0.164336	0.0571582	0.111492	0.0490092
Nmu	2.46462	1.441	3.31389	0.868649	0.847136	1.66137
Rhoh	0.137581	0.130262	0.102547	0.0634155	0	0
Tnn	0.0160393	0.0303722	0.00796997	0.0739302	0.0504738	0.0316931
Rassf6	0.0482082	0	0.0359322	0	0	0
Car4	0.0788289	0.0746358	0.0783407	0	0	0
Slc25a47	0	0.120554	0.0759303	0	0	0
Magea11	0	0	0	0.0852908	0.138635	0
Erbb3	0.112433	0.0818727	0.0945477	0.0159447	0.0388757	0.0615153
Wnt16	0	0	0	0.0853934	0.0832703	0.024414
Slurp1	0	0	0.102822	0.286137	0	0.981294
Lrrc69	0.0909887	0.0861487	0.0904252	0	0	0
Unc79	0.00677192	0.0128234	0.0269199	0.0499424	0.0487046	0.0802866
Clip4	0	0	0	0.016693	0.0325664	0.143122
Plag1	0.16938	0.204076	0.137728	0.070969	0.0830588	0.0608472
Arpp21	0.0755122	0.0238255	0.0333496	0.10054	0.0754254	0.13925
1700109H08Rik	0.0363697	0.206577	0.108433	0	0	0
Dnase1l3	0.0366032	0	0	0.269946	0	0.115712
Prr15	0.0362669	0	0	0.0334332	0.195643	0.114649
Kcnh2	0.0337172	0.0425649	0.0335084	0.0621655	0.141463	0.142135
Oprd1	0.108647	0	0.0719828	0.133544	0.195367	0.229001
Scg3	0	0	0.0475745	0	0.172147	0.189183
Clmn	0.0982366	0.0723292	0.0542423	0.291786	0.127557	0.181155
Aldh1b1	0	0	0	0.0430856	0.126063	0
Col9a2	0	0	0.0863396	0.160149	0.0624718	0.096113
Grin1	0.00803596	0.00760485	0.0239586	0.0444484	0.065022	0.0317576
Slc36a2	0	0	0	0.0645402	0.0472016	0
Rrad	0.0385992	0.0182642	0.0191801	0.0889582	0.208225	0.0305054
Il22ra2	0.0409722	0	0.101815	0	0	0
Ppm1j	0.167571	0.0453245	0.261682	0.507501	0.279744	0.35944
Gpr18	0	0	0	0.180427	0	0.0618718
Ednra	0.127059	0.0676571	0.118381	0.139076	0.192749	0.345171
Mlf1	0.184596	0.21845	0.0458631	0.425431	0.414907	0.328266
Slc6a12	0.506364	0.123697	0.259737	0.195736	0.0293741	0.0387301
Dok3	0.873875	0.318161	0.668037	0.216867	0.302146	0.398436
Ctrc	0.241723	0.343224	0.480413	0.0371334	0.10863	0.127337
Dusp2	0.600822	0.598684	1.69703	0.233188	0.483277	0.649781
Ntrk1	0	0.0370476	0.05833	0.180358	0.0351861	0.123711
Ddb2	0.418605	0.634049	0.221885	0.926119	1.17917	0.617569
Rnf151	0.175445	0.166112	0.217989	0.646946	0.512626	0.416001
Tmem25	0.161714	0.248749	0.0803463	0.503096	0.472465	0.255608
Trim66	0.0595056	0.0225361	0.0354823	0.120684	0.1177	0.0658436
Plcxd3	0	0.0258048	0.0270987	0.150822	0.122576	0.0861997
Dnaaf1	0	0	0.0182272	0.0338155	0.0329854	0.144963
Sigirr	0.0965222	0	0	0.177961	0.144632	0.203444
Gucy2g	0.0149049	0	0	0.0549613	0.0535991	0.0706883
Cml3	0.0746982	0.141449	0.296942	0	0	0
Wnk2	0.0141664	0.0134128	0	0.0130595	0.0509432	0.0391881
Adamts16	0	0	0	0.0516603	0.012598	0.110731
Hist1h1a	0.137951	0	0	0.445102	0.24804	0.163562
Il34	0.381027	0.166465	0.0582522	0.378247	0.474303	0.463287
Slc12a5	0.0443413	0.0559768	0	0.109005	0.119594	0.140185
Tmem221	0	0	0	0.204796	0.199704	0.234095
C1qtnf3	0.0267279	0.101225	0.132837	0.246396	0.28837	0.338014
AABR07071746.1	0.0652896	0.123633	0.129771	0.601882	0.352207	0.206397
Prkcq	0.335041	0.273917	0.211897	0.126342	0.0410668	0.192578
Zfp385b	0	0.0197431	0	0.0384461	0.0374933	0.0494474
Ocstamp	0.406928	0.264815	0.252748	0.210987	0.182896	0.0201071
Htr4	0.0332584	0	0.297503	0	0	0
Pcdh12	0.0288788	0.0364569	0	0.0532447	0.103859	0.0836961
Lrrc4b	0.133163	0.0540179	0.15124	0.0175345	0.034208	0.0601289
Tas1r3	0	0	0	0	0.107425	0.0786977
Artn	0.154223	0.328526	0.229938	0.355432	0.693279	0.426623
Rhbdl1	0.135761	0.224929	0.13492	0.469325	0.396675	0.321906
Il4i1	0.235668	0.297453	0.078061	0.337914	0.353095	0.64153
Tmem145	0.0229609	0.0652082	0.0456374	0	0	0
Tulp2	0	0.0413866	0.0434411	0.141037	0.176844	0.034546
Mzb1	0	0	0	0.256551	0.100101	0
Zmynd12	0.301351	0.196109	0.262053	0.451395	0.524872	0.580511
Rad21l1	0	0.0292206	0	0.0853934	0.0832703	0.170829
Skint10	0	0.0967089	0.0676839	0.219745	0.153078	0.242224
Raet1d	0.456212	0.593774	0.396719	1.15642	1.23033	0.676013
Ccdc155	0.111439	0.0527556	0.304585	0.43661	0.300581	0.396363
Pkd2l2	0.0415023	0.0196379	0.0206227	0.0573893	0.149245	0.0984149
Sez6l	0.0214315	0.0101409	0.085205	0.00987846	0	0.00847276
Wdr86	0	0	0	0.0679387	0.0662495	0.0194237
Ms4a14	0.0134586	0	0	0.037221	0.133103	0
Ip6k3	0	0	0	0.0438646	0.064161	0.0188113
Gpr137c	0	0	0	0.0371918	0.0725576	0.0956682
Xrra1	0	0.030928	0	0.0602265	0.0440468	0.0774602
Hcar2	0.0947694	0	0.0470912	0.262094	0.213009	0.112364
Scn4b	0.0120126	0.0227471	0	0.0775177	0.118802	0.0379747
Lhfpl1	0	0	0	0.0667563	0.0868024	0.0572389
Txndc2	0	0	0	0.0138125	0.0269469	0.0355299
Bcl2l14	0.101753	0.0963254	0.0337077	0.406479	0.182971	0.321693
Xkr5	0.259084	0.557403	0.327716	0.629636	1.10105	0.651504
Olig1	0	0.134945	0.0944441	0	0	0
Gbp4	0.117272	0.277513	0.0776844	0.108091	0.017573	0.0463404
Thsd7a	0.291371	0.265968	0.227522	0.124697	0.140321	0.12336
AABR07004397.1	0.152731	0.289214	0.455356	0	0	0
Dgkb	0.00781447	0.00739525	0	0.0720389	0.00702705	0.0247035
Grid2ip	0	0	0	0.0137124	0.0401145	0.0235113
Havcr2	0.111457	0.0879175	0.166141	0.017122	0.0500887	0.0146855
Klra2	0.0110981	0.0315182	0.0330881	0	0	0
Cngb1	0	0.0171628	0	0.0501321	0.0733363	0.014326
Cyp2d4	0	0	0.0289936	0.107579	0.104913	0.0691813
Tmprss9	0.0738857	0.0582812	0.0856638	0	0	0.0486574
Oas1k	0.0285455	0.00675353	0	0.0263151	0.0320802	0.0507623
RGD1560470	0.526386	0.481686	0.313878	0.291126	0.173512	0.166401
LOC680693	0.222878	0	0	0.359561	0.150266	0.440399
Npb	0.997981	0.674767	0.424999	0.131411	0	0.225316
Fscn2	0	0.0852283	0.0596489	0.553309	0.269811	0.047435
Clca4l	0.0355755	0.117883	0.229842	0.245969	0.30385	0.295248
Plekhd1	0.0458057	0.0433622	0.273161	0.0422267	0.01373	0.0120726
LOC502618	0	0	0	0.0450123	0.0219537	0.115785
Btnl3	0	0	0	0.0248989	0.0364198	0.0213458
Prss22	0.161503	0.0382098	0.120377	0	0	0
Vnn3	0.114869	0.299047	0.256881	0.397101	0.671286	0.453954
Icam4	0.0607309	0.115001	0.362186	0.447886	0.655231	0.335997
Acsm1	0.0188149	0.00890277	0.0186984	0.0693792	0.0676597	0.0297393
Efcab2	0.0310264	0.0440569	0.0154171	0.100108	0.167373	0.049041
Rnf180	0.0287978	0	0	0.132738	0.051792	0.0682884
Apoa1	0.0577251	0.218618	0	0.425718	0.518984	0.182483
Syt14	0.123836	0.164137	0.0738414	0.319648	0.178129	0.313218
LOC498675	0.501687	0.522382	0.299166	0.138733	0.225502	0.198244
Rn60_9_0428.1	0.410541	0.194352	0	0.946159	0.55367	0.811215
MGC109340	0.236675	0.128031	0.0671934	0.249317	0.334337	0.427528
Hba2	0	0	0	0.339734	0.331314	0
Foxg1	0.054768	0	0.254036	0.0168296	0	0.0144347
Afmid	0.265702	0.212822	0.264076	0.75363	0.40424	0.371527
Emr4	0.0509609	0.0321668	0.0337635	0	0	0
Vom2r35	0	0	0	0.036003	0	0.0123461
G6pc	0.0249903	0	0	0.0230377	0.0561696	0.0592598
Vps25	13.7795	14.7936	13.76	3.57479	1.36485	14.7376
SCARNA2	0.246719	0	0.245191	0.227442	0.665469	0.975019
AABR07002885.1	0.0604804	0.0572633	0.0601059	0	0	0.0477984
AABR07025386.1	0.311329	0.252583	0.0883879	0.573927	0.559722	0.597509
SNORA75	0.374581	0	0	2.07188	0.673673	0.888248
Dhh	0.0828038	0.15678	0.144029	0.0572504	0.018615	0.0654408
AABR07070518.1	0.059637	0.141148	0	0.19242	0.241273	0.141418
Tnip3	0.225643	0.1602	0.43729	0.114396	0.172424	0.0980839
AABR07062800.1	0	0.0156357	0	0.0609246	0.0891291	0
AABR07049148.1	0.0354159	0.268224	0	0	0	0
AABR07068030.1	0.17455	0.165186	0.173469	0.482734	1.41235	1.2416
Nup210l	0.0818116	0.0516261	0.054206	0.00837902	0.0408587	0.0215533
Ttc23l	0.0823058	0.0779276	0.163592	0	0	0
AABR07027371.1	0	0.0181347	0.019044	0.0706616	0.0344635	0.12117
AC105485.2	0.397811	0.188235	0.593021	0	0	0
Nkapl	0	0	0	0.0303645	0.0888287	0.0781065
AABR07006097.1	0	0	0	0.0416443	0.0270814	0.0119061
U6	0	0.505881	1.0625	3.44954	1.44162	2.53521
SNORA27	1.98906	2.25954	1.58139	0.366728	0.715452	0.62879
Spef2	0	0	0	0.00772123	0.0150634	0.0198613
AABR07044418.1	0	0	0	0.143793	0	0.369878
AC106292.2	0.0894815	0.169443	0.0444637	0	0	0
Akap3	0	0.0138046	0.0579873	0.0941318	0.222956	0.115295
Rn60_9_0975.2	0.250636	0.533904	0.311413	0.75092	0.957703	0.891455
Asic1	0.0106979	0	0	0.00986199	0.0480902	0.0507359
AC097038.1	0	0	0	0.140797	0.274682	0.362173
Asz1	0	0	0	0.0274249	0	0.188112
AABR07070161.7	0	0	0	0.374469	0.121759	0.214021
AABR07068214.1	0	0	0	0.119465	0.233064	0.512131
Rsph6a	0	0	0	0.08139	0.039696	0.10468
AABR07027870.2	0.160512	0.246901	0.279161	0.110965	0.108223	0.110992
AABR07041724.2	0.208608	0	0	0.769235	0.375176	0.494675
