# Supplementary material for: Effect of high glucose on the gene expression profiling in cardiac fibroblasts from rats at different ages
Source: PeerJ journal article supplement (doi:10.7717/peerj.19040), 2025-03-03
Supplement: H_vs_N_Top_20_KEGG.xlsx [file H_vs_N_Top_20_KEGG.xlsx]

## Sheet: S1-H vs S1-N
S1-H vs S1-N KEGG
Up
Term	Count	Pvalue	Genes
IL-17 signaling pathway	10	3.97e-09	ENSRNOG00000008525(Csf3),ENSRNOG00000002843(Cxcl6),ENSRNOG00000002802(Cxcl1),ENSRNOG00000007159(Ccl2),ENSRNOG00000015992(Ccl20),ENSRNOG00000000239(Ccl7),ENSRNOG00000028043(Cxcl3),ENSRNOG00000002525(Ptgs2),ENSRNOG00000026805(Csf2),ENSRNOG00000010278(Il6)
Phenylalanine metabolism	2	0.00192155	ENSRNOG00000002331(Aldh3a1),ENSRNOG00000029778(Maob)
Histidine metabolism	2	0.00218141	ENSRNOG00000002331(Aldh3a1),ENSRNOG00000029778(Maob)
Mucin type O-glycan biosynthesis	1	0.00309027	ENSRNOG00000005335(Galnt13)
Malaria	4	0.000250685	ENSRNOG00000008525(Csf3),ENSRNOG00000007159(Ccl2),ENSRNOG00000007310(Klrb1b),ENSRNOG00000010278(Il6)
TNF signaling pathway	7	1.68e-06	ENSRNOG00000002802(Cxcl1),ENSRNOG00000007159(Ccl2),ENSRNOG00000015992(Ccl20),ENSRNOG00000028043(Cxcl3),ENSRNOG00000002525(Ptgs2),ENSRNOG00000026805(Csf2),ENSRNOG00000010278(Il6)
Rheumatoid arthritis	5	0.000306644	ENSRNOG00000002843(Cxcl6),ENSRNOG00000007159(Ccl2),ENSRNOG00000015992(Ccl20),ENSRNOG00000026805(Csf2),ENSRNOG00000010278(Il6)
Drug metabolism - cytochrome P450	4	0.0011098	ENSRNOG00000002331(Aldh3a1),ENSRNOG00000034191(Fmo1),ENSRNOG00000000201(Gsta5),ENSRNOG00000029778(Maob)
Legionellosis	3	0.00323671	ENSRNOG00000002802(Cxcl1),ENSRNOG00000028043(Cxcl3),ENSRNOG00000010278(Il6)
Hematopoietic cell lineage	4	0.00048346	ENSRNOG00000008525(Csf3),ENSRNOG00000007129(Cd8b),ENSRNOG00000026805(Csf2),ENSRNOG00000010278(Il6)
Tyrosine metabolism	2	0.0102772	ENSRNOG00000002331(Aldh3a1),ENSRNOG00000029778(Maob)
Cytokine-cytokine receptor interaction	13	6.45e-07	ENSRNOG00000008525(Csf3),ENSRNOG00000002843(Cxcl6),ENSRNOG00000007601(Inhbe),ENSRNOG00000002802(Cxcl1),ENSRNOG00000007159(Ccl2),ENSRNOG00000022242(Cxcl9),ENSRNOG00000015992(Ccl20),ENSRNOG00000002968(Tnfsf4),ENSRNOG00000000239(Ccl7),ENSRNOG00000048636(Il2rb),ENSRNOG00000028043(Cxcl3),ENSRNOG00000026805(Csf2),ENSRNOG00000010278(Il6)
African trypanosomiasis	2	0.0117448	ENSRNOG00000010278(Il6),ENSRNOG00000030387(Kng1l1)
Salmonella infection	4	0.00183092	ENSRNOG00000002802(Cxcl1),ENSRNOG00000028043(Cxcl3),ENSRNOG00000026805(Csf2),ENSRNOG00000010278(Il6)
Tryptophan metabolism	2	0.0168678	ENSRNOG00000019500(Cyp1a1),ENSRNOG00000029778(Maob)
Chemical carcinogenesis	4	0.0034189	ENSRNOG00000002331(Aldh3a1),ENSRNOG00000019500(Cyp1a1),ENSRNOG00000000201(Gsta5),ENSRNOG00000002525(Ptgs2)
Metabolism of xenobiotics by cytochrome P450	3	0.00896625	ENSRNOG00000002331(Aldh3a1),ENSRNOG00000019500(Cyp1a1),ENSRNOG00000000201(Gsta5)
Cholesterol metabolism	2	0.0198465	ENSRNOG00000007545(Angptl4),ENSRNOG00000053769(Soat2)
Transcriptional misregulation in cancer	5	0.000222924	ENSRNOG00000032108(AABR07067457.1),ENSRNOG00000012811(Spint1),ENSRNOG00000048636(Il2rb),ENSRNOG00000026805(Csf2),ENSRNOG00000010278(Il6)
Chemokine signaling pathway	7	0.000470642	ENSRNOG00000002843(Cxcl6),ENSRNOG00000002802(Cxcl1),ENSRNOG00000007159(Ccl2),ENSRNOG00000022242(Cxcl9),ENSRNOG00000015992(Ccl20),ENSRNOG00000000239(Ccl7),ENSRNOG00000028043(Cxcl3)
Down
Term	Count	Pvalue	Genes
Phototransduction	2	0.00276516	ENSRNOG00000031773(Cngb1),ENSRNOG00000011144(Rho)
Mucin type O-glycan biosynthesis	1	0.00309027	ENSRNOG00000040301(Galntl5)
TNF signaling pathway	1	1.68e-06	ENSRNOG00000004437(Map2k6)
Thyroid cancer	2	0.00892594	ENSRNOG00000014751(Ret),ENSRNOG00000004537(Rxrg)
Hematopoietic cell lineage	1	0.00048346	ENSRNOG00000046981(Gp1bb)
Transcriptional misregulation in cancer	3	0.000222924	ENSRNOG00000003098(Prom1),ENSRNOG00000007591(Slc45a3),ENSRNOG00000004537(Rxrg)
Toll-like receptor signaling pathway	1	0.0178839	ENSRNOG00000004437(Map2k6)
Kaposi sarcoma-associated herpesvirus infection	1	0.0042246	ENSRNOG00000004437(Map2k6)
Fc epsilon RI signaling pathway	1	0.0422084	ENSRNOG00000004437(Map2k6)
Parathyroid hormone synthesis, secretion and action	2	0.0276149	ENSRNOG00000047028(Mmp24),ENSRNOG00000004537(Rxrg)
Th17 cell differentiation	1	0.028477	ENSRNOG00000004537(Rxrg)
Inflammatory mediator regulation of TRP channels	1	0.0349857	ENSRNOG00000004437(Map2k6)
PPAR signaling pathway	1	0.0637052	ENSRNOG00000004537(Rxrg)
Retinol metabolism	1	0.0740447	ENSRNOG00000053850(Rdh5)
Estrogen signaling pathway	2	0.0583366	ENSRNOG00000001287(Gper1),ENSRNOG00000014233(Krt19)
Small cell lung cancer	1	0.0922366	ENSRNOG00000004537(Rxrg)
Fluid shear stress and atherosclerosis	1	0.0907283	ENSRNOG00000004437(Map2k6)
Hepatitis B	2	0.0978213	ENSRNOG00000002501(Ddx3y),ENSRNOG00000004437(Map2k6)
Cell adhesion molecules (CAMs)	2	0.0996404	ENSRNOG00000020884(Cd6),ENSRNOG00000045811(Cldn5)
cGMP-PKG signaling pathway	2	0.116831	ENSRNOG00000031773(Cngb1),ENSRNOG00000010531(Oprd1)

## Sheet: S2-H vs S2-N
S2-H vs S2-N KEGG
Up
Term	Count	Pvalue	genes
Carbohydrate digestion and absorption	2	0.000101157	ENSRNOG00000051171(G6pc),ENSRNOG00000011227(Atp1b2)
Galactose metabolism	1	0.000847647	ENSRNOG00000051171(G6pc)
Nicotine addiction	1	0.00235755	ENSRNOG00000011726(Grin1)
Cardiac muscle contraction	2	0.000149159	ENSRNOG00000050675(Myl4),ENSRNOG00000011227(Atp1b2)
Salivary secretion	3	0.00131081	ENSRNOG00000049410(Chrm3),ENSRNOG00000009522(Adra1a),ENSRNOG00000011227(Atp1b2)
Synaptic vesicle cycle	1	0.00131081	ENSRNOG00000013547(Slc6a12)
Graft-versus-host disease	1	0.00669954	ENSRNOG00000038835(Cd86)
Allograft rejection	1	0.0073593	ENSRNOG00000038835(Cd86)
Type I diabetes mellitus	1	0.00997246	ENSRNOG00000038835(Cd86)
Glycolysis / Gluconeogenesis	2	0.00997246	ENSRNOG00000017597(Fbp1),ENSRNOG00000051171(G6pc)
Pancreatic secretion	3	0.00386223	ENSRNOG00000049410(Chrm3),ENSRNOG00000010406(Cel),ENSRNOG00000011227(Atp1b2)
Autoimmune thyroid disease	1	0.0103853	ENSRNOG00000038835(Cd86)
Adrenergic signaling in cardiomyocytes	3	0.00199559	ENSRNOG00000050675(Myl4),ENSRNOG00000009522(Adra1a),ENSRNOG00000011227(Atp1b2)
Gastric acid secretion	2	0.0130767	ENSRNOG00000049410(Chrm3),ENSRNOG00000011227(Atp1b2)
Bile secretion	1	0.0130767	ENSRNOG00000011227(Atp1b2)
Calcium signaling pathway	5	0.00109024	ENSRNOG00000049410(Chrm3),ENSRNOG00000009522(Adra1a),ENSRNOG00000011726(Grin1),ENSRNOG00000037456(P2rx2),ENSRNOG00000046972(Chrm2)
AMPK signaling pathway	3	0.00819306	ENSRNOG00000017597(Fbp1),ENSRNOG00000009522(Adra1a),ENSRNOG00000051171(G6pc)
Insulin secretion	2	0.0195969	ENSRNOG00000049410(Chrm3),ENSRNOG00000011227(Atp1b2)
Taste transduction	2	0.0221176	ENSRNOG00000049410(Chrm3),ENSRNOG00000037456(P2rx2)
Glucagon signaling pathway	2	0.0241242	ENSRNOG00000017597(Fbp1),ENSRNOG00000051171(G6pc)
Down
Term	Count	Pvalue	Genes
Carbohydrate digestion and absorption	1	0.000101157	ENSRNOG00000003681(Lct)
Galactose metabolism	1	0.000847647	ENSRNOG00000003681(Lct)
Nicotine addiction	1	0.00235755	ENSRNOG00000020650(Slc17a7)
Cardiac muscle contraction	2	0.000149159	ENSRNOG00000018378(Cacnb2),ENSRNOG00000050015(LOC100910772)
Synaptic vesicle cycle	2	0.00131081	ENSRNOG00000020650(Slc17a7),ENSRNOG00000003476(Slc6a4)
Graft-versus-host disease	1	0.00669954	ENSRNOG00000002978(Faslg)
Allograft rejection	1	0.0073593	ENSRNOG00000002978(Faslg)
Type I diabetes mellitus	1	0.00997246	ENSRNOG00000002978(Faslg)
Autoimmune thyroid disease	1	0.0103853	ENSRNOG00000002978(Faslg)
Adrenergic signaling in cardiomyocytes	1	0.00199559	ENSRNOG00000018378(Cacnb2)
Bile secretion	1	0.0130767	ENSRNOG00000028889(Slc51b)
cGMP-PKG signaling pathway	1	0.0228015	ENSRNOG00000010531(Oprd1)
Glutamatergic synapse	1	0.043825	ENSRNOG00000020650(Slc17a7)
Neuroactive ligand-receptor interaction	1	0.00579359	ENSRNOG00000010531(Oprd1)
FoxO signaling pathway	1	0.0539615	ENSRNOG00000002978(Faslg)
Cytokine-cytokine receptor interaction	3	0.0265999	ENSRNOG00000031162(Ccl24),ENSRNOG00000002978(Faslg),ENSRNOG00000014850(Amhr2)
Ras signaling pathway	1	0.0659492	ENSRNOG00000002978(Faslg)
Cell adhesion molecules (CAMs)	1	0.0952944	ENSRNOG00000030515(Nfasc)
Non-alcoholic fatty liver disease (NAFLD)	2	0.0967299	ENSRNOG00000002978(Faslg),ENSRNOG00000050015(LOC100910772)
PI3K-Akt signaling pathway	1	0.0650717	ENSRNOG00000002978(Faslg)

## Sheet: S3-H vs S3-N
S3-H vs S3-N KEGG
Up
Term	Count	Pvalue	Genes
Salivary secretion	2	0.000358375	ENSRNOG00000017002(Adrb1),ENSRNOG00000012674(Adrb3)
Intestinal immune network for IgA production	2	0.00310185	ENSRNOG00000010278(Il6),ENSRNOG00000003866(Cxcr4)
Prion diseases	2	0.0115037	ENSRNOG00000010278(Il6),ENSRNOG00000012804(C1qc)
Synaptic vesicle cycle	3	0.00269155	ENSRNOG00000013547(Slc6a12),ENSRNOG00000006426(Syt1),ENSRNOG00000011000(Rims1)
Thyroid cancer	2	0.0155635	ENSRNOG00000020151(Cdh1),ENSRNOG00000010121(Lef1)
Calcium signaling pathway	4	2.16e-05	ENSRNOG00000003866(Cxcr4),ENSRNOG00000017002(Adrb1),ENSRNOG00000016361(Plcd4),ENSRNOG00000012674(Adrb3)
Melanogenesis	1	0.00144217	ENSRNOG00000010121(Lef1)
Complement and coagulation cascades	3	0.00416194	ENSRNOG00000004125(C4bpb),ENSRNOG00000012804(C1qc),ENSRNOG00000002460(Serpinb2)
Basal cell carcinoma	1	0.00945318	ENSRNOG00000010121(Lef1)
African trypanosomiasis	1	0.0203657	ENSRNOG00000010278(Il6)
Pertussis	3	0.0142587	ENSRNOG00000004125(C4bpb),ENSRNOG00000010278(Il6),ENSRNOG00000012804(C1qc)
Renin secretion	2	0.0149534	ENSRNOG00000017002(Adrb1),ENSRNOG00000012674(Adrb3)
Wnt signaling pathway	1	0.00336096	ENSRNOG00000010121(Lef1)
PPAR signaling pathway	1	0.0213175	ENSRNOG00000056219(Olr1)
cGMP-PKG signaling pathway	3	0.00503022	ENSRNOG00000017002(Adrb1),ENSRNOG00000003687(Rgs2),ENSRNOG00000012674(Adrb3)
Endometrial cancer	2	0.0473565	ENSRNOG00000020151(Cdh1),ENSRNOG00000010121(Lef1)
Regulation of lipolysis in adipocytes	2	0.0473565	ENSRNOG00000017002(Adrb1),ENSRNOG00000012674(Adrb3)
Graft-versus-host disease	1	0.0473565	ENSRNOG00000010278(Il6)
Gap junction	1	0.0302983	ENSRNOG00000017002(Adrb1)
Rheumatoid arthritis	2	0.0302983	ENSRNOG00000010278(Il6),ENSRNOG00000017386(Il11)
Down
Term	Count	Pvalue	Genes
Salivary secretion	3	0.000358375	ENSRNOG00000054371(Prkcg),ENSRNOG00000021256(Adra1d),ENSRNOG00000003737(Best2)
Intestinal immune network for IgA production	1	0.00310185	ENSRNOG00000014464(Tnfsf13b)
Synaptic vesicle cycle	1	0.00269155	ENSRNOG00000018644(Slc6a7)
Calcium signaling pathway	6	2.16e-05	ENSRNOG00000054371(Prkcg),ENSRNOG00000021256(Adra1d),ENSRNOG00000018712(Camk2a),ENSRNOG00000029871(Slc8a3),ENSRNOG00000012721(Ednra),ENSRNOG00000017625(Htr2b)
Aldosterone-regulated sodium reabsorption	2	0.0166934	ENSRNOG00000054371(Prkcg),ENSRNOG00000017084(Hsd11b2)
Melanogenesis	4	0.00144217	ENSRNOG00000054371(Prkcg),ENSRNOG00000003845(Wnt3),ENSRNOG00000061238(Wnt10b),ENSRNOG00000018712(Camk2a)
Complement and coagulation cascades	1	0.00416194	ENSRNOG00000051158(C2)
Basal cell carcinoma	2	0.00945318	ENSRNOG00000003845(Wnt3),ENSRNOG00000061238(Wnt10b)
African trypanosomiasis	1	0.0203657	ENSRNOG00000054371(Prkcg)
Renin secretion	1	0.0149534	ENSRNOG00000012721(Ednra)
Wnt signaling pathway	5	0.00336096	ENSRNOG00000054371(Prkcg),ENSRNOG00000003845(Wnt3),ENSRNOG00000010518(Cer1),ENSRNOG00000061238(Wnt10b),ENSRNOG00000018712(Camk2a)
PPAR signaling pathway	2	0.0213175	ENSRNOG00000013279(LOC681458),ENSRNOG00000058193(Slc27a6)
cGMP-PKG signaling pathway	3	0.00503022	ENSRNOG00000021256(Adra1d),ENSRNOG00000029871(Slc8a3),ENSRNOG00000012721(Ednra)
Inflammatory mediator regulation of TRP channels	4	0.0154903	ENSRNOG00000054371(Prkcg),ENSRNOG00000018712(Camk2a),ENSRNOG00000004437(Map2k6),ENSRNOG00000017625(Htr2b)
Insulin secretion	3	0.0270816	ENSRNOG00000029264(Kcnn1),ENSRNOG00000054371(Prkcg),ENSRNOG00000018712(Camk2a)
VEGF signaling pathway	2	0.0473565	ENSRNOG00000054371(Prkcg),ENSRNOG00000013294(Sh2d2a)
Graft-versus-host disease	1	0.0473565	ENSRNOG00000049590(RT1-M2)
Gap junction	2	0.0302983	ENSRNOG00000054371(Prkcg),ENSRNOG00000017625(Htr2b)
Rheumatoid arthritis	1	0.0302983	ENSRNOG00000014464(Tnfsf13b)
GABAergic synapse	1	0.0349451	ENSRNOG00000054371(Prkcg)

## Sheet: S4-H vs S4-N
S4-H vs S4-N KEGG
Up
Term	Count	Pvalue	Genes
Adipocytokine signaling pathway	1	0.0241978	ENSRNOG00000019057(Prkcq)
Inflammatory mediator regulation of TRP channels	1	0.0150368	ENSRNOG00000019057(Prkcq)
Calcium signaling pathway	2	0.00409842	ENSRNOG00000019134(Htr4),ENSRNOG00000004964(Erbb3)
cAMP signaling pathway	1	0.0487593	ENSRNOG00000019134(Htr4)
GABAergic synapse	1	0.0693201	ENSRNOG00000013547(Slc6a12)
Insulin resistance	1	0.0224637	ENSRNOG00000019057(Prkcq)
Neuroactive ligand-receptor interaction	3	0.101226	ENSRNOG00000036685(Npb),ENSRNOG00000019134(Htr4),ENSRNOG00000002164(Nmu)
Serotonergic synapse	1	0.105137	ENSRNOG00000019134(Htr4)
FoxO signaling pathway	1	0.111136	ENSRNOG00000047891(Foxg1)
Measles	1	0.119379	ENSRNOG00000019057(Prkcq)
Vascular smooth muscle contraction	1	0.0591512	ENSRNOG00000019057(Prkcq)
PI3K-Akt signaling pathway	1	0.167004	ENSRNOG00000004964(Erbb3)
Hippo signaling pathway	1	0.205124	ENSRNOG00000002866(Rassf6)
MAPK signaling pathway	2	0.272577	ENSRNOG00000013862(Dusp2),ENSRNOG00000004964(Erbb3)
Proteoglycans in cancer	1	0.305056	ENSRNOG00000004964(Erbb3)
MicroRNAs in cancer	1	0.439615	ENSRNOG00000004964(Erbb3)
NF-kappa B signaling pathway	1	1	ENSRNOG00000019057(Prkcq)
Leukocyte transendothelial migration	1	1	ENSRNOG00000002540(Rhoh)
Nitrogen metabolism	1	1	ENSRNOG00000002916(Car4)
RNA transport	1	1	ENSRNOG00000055790(Nup210l)
Down
Term	Count	Pvalue	Genes
Tryptophan metabolism	3	0.000676551	ENSRNOG00000050205(Afmid),ENSRNOG00000020148(Il4i1),ENSRNOG00000011497(Aldh1b1)
Thyroid cancer	2	0.00437884	ENSRNOG00000014071(Ddb2),ENSRNOG00000013953(Ntrk1),
Carbohydrate digestion and absorption	2	0.00437884	ENSRNOG00000019589(Tas1r3),ENSRNOG00000051171(G6pc)
African trypanosomiasis	2	0.00579388	ENSRNOG00000045679(Apoa1),ENSRNOG00000047321(Hba2)
Valine, leucine and isoleucine degradation	2	0.0110146	ENSRNOG00000020148(Il4i1),ENSRNOG00000011497(Aldh1b1)
Basal cell carcinoma	2	0.0175945	ENSRNOG00000005781(Wnt16),ENSRNOG00000014071(Ddb2)
Glycerolipid metabolism	2	0.0175945	ENSRNOG00000030771(Dgkb),ENSRNOG00000011497(Aldh1b1)
Glycolysis / Gluconeogenesis	2	0.0207441	ENSRNOG00000011497(Aldh1b1),ENSRNOG00000051171(G6pc)
Adipocytokine signaling pathway	1	0.0241978	ENSRNOG00000051171(G6pc),
Renin secretion	2	0.0251092	ENSRNOG00000012721(Ednra),ENSRNOG00000036877(Clca4l)
Inflammatory mediator regulation of TRP channels	2	0.0150368	ENSRNOG00000013953(Ntrk1),ENSRNOG00000059765(Asic1)
Calcium signaling pathway	3	0.00409842	ENSRNOG00000011726(Grin1),ENSRNOG00000012721(Ednra),ENSRNOG00000000920(Phkg1)
cAMP signaling pathway	4	0.00649091	ENSRNOG00000011726(Grin1),ENSRNOG00000012721(Ednra),ENSRNOG00000031773(Cngb1),ENSRNOG00000026653(Hcar2)
ECM-receptor interaction	2	0.0375642	ENSRNOG00000002548(Tnn),ENSRNOG00000011502(Col9a2)
GABAergic synapse	1	0.0487593	ENSRNOG00000018111(Slc12a5)
Glucagon signaling pathway	2	0.0487593	ENSRNOG00000000920(Phkg1),ENSRNOG00000051171(G6pc)
Phosphatidylinositol signaling system	2	0.0542451	ENSRNOG00000030771(Dgkb),ENSRNOG00000025883(Ip6k3)
Transcriptional misregulation in cancer	4	0.0258671	ENSRNOG00000012827(Mlf1),ENSRNOG00000005781(Wnt16),ENSRNOG00000014071(Ddb2),ENSRNOG00000013953(Ntrk1)
Insulin resistance	1	0.0693201	ENSRNOG00000051171(G6pc)
cGMP-PKG signaling pathway	3	0.0542084	ENSRNOG00000012721(Ednra),ENSRNOG00000031773(Cngb1),ENSRNOG00000010531(Oprd1)
