# Supplementary material for: Effect of high glucose on the gene expression profiling in cardiac fibroblasts from rats at different ages
Source: PeerJ journal article supplement (doi:10.7717/peerj.19040), 2025-03-03
Supplement: H_vs_N_volcano_plots.xlsx [file H_vs_N_volcano_plots.xlsx]

## Sheet: S1-H vs S1-N
gene name	log2FC	Pvalue-up	Pvalue-down
Bdkrb1	1.02339	0.0183025
Ccl7	1.0485	0.00273378
Hist1h2ah	1.05734	0.0381204
Tgm1	1.06645	0.0430815
Cd8b	1.07223	0.0307467
Ptges	1.08487	0.0309712
RGD1560289	1.12029	0.0178831
Ptgs2	1.13563	0.0115384
RGD1560997	1.19895	0.0361786
RT1-CE6	1.20572	0.00542239
Ccl2	1.22667	0.00211923
Rn60_5_0825.2	1.24639	0.00942698
Maob	1.26068	0.0144806
Slamf7	1.26265	0.0148799
Cdc42ep2	1.29256	0.0285853
Ntn3	1.29855	0.0428936
Slco4a1	1.29868	8.817e-13
Ccl20	1.29961	0.0129997
Cxcl3	1.30545	0.000545444
Kcnj12	1.30673	0.0431712
Gpr68	1.30953	0.00830649
AABR07071659.2	1.35114	0.0125618
Cnnm1	1.36376	0.000150144
Pkhd1l1	1.382	0.0020886
Ccno	1.38955	0.0120903
Tfpi2	1.40552	0.000331011
Ascl2	1.40746	0.0397811
Zc2hc1c	1.40962	0.0269054
Ak7	1.42551	0.0371796
Pspn	1.43251	0.0194371
Galnt13	1.47404	0.0432934
Myl6b	1.54564	0.0111769
Plekhs1	1.55816	0.00414161
Rassf10	1.6226	0.0244702
Soat2	1.64228	0.0273654
Tifab	1.65886	0.048374
Aldh3a1	1.67985	2.34119e-07
Il6	1.68577	0.00354692
AABR07005593.1	1.70368	0.000177932
Angptl4	1.7046	0.0170197
Fmo1	1.70744	0.0301861
Lrrtm4	1.71255	0.0337826
Nwd1	1.7184	0.0214363
Cxcl6	1.73347	0.0253032
AABR07032657.1	1.76347	0.00766207
Scml4	1.83073	0.030675
AABR07016578.1	1.8645	0.0286432
Il2rb	1.9324	0.0487847
Klrb1b	2.15709	0.00839384
Cxcl1	2.28683	0.00276703
RGD1307391	2.3445	0.0188369
AABR07001929.1	2.3701	0.0352721
Spint1	2.3905	0.00828807
Gsta5	2.40364	0.00801838
AABR07012775.1	2.43101	0.00473439
Paqr5	2.44504	1.13577e-05
Cxcl9	2.46281	0.0318724
Inhbe	2.56104	0.0224059
Agmat	2.6243	0.0158522
Camk1g	2.73643	0.0331092
Plk5	2.74582	0.0326061
AABR07044454.1	2.98185	0.00171666
Kng1l1	3.07242	0.000883944
Fat2	3.08102	0.0413144
AABR07072539.1	3.20198	0.0329349
Siah3	3.21078	0.0466612
Guca2a	3.21794	0.0174766
Ppapdc1a	3.29755	0.032379
Angptl6	3.31509	0.0180339
LOC56764	3.36287	0.0325129
Rn60_10_0890.5	3.36587	0.00453214
Csf3	3.39915	0.0130138
AABR07027371.1	3.45345	0.0162484
Csf2	3.51043	0.0198815
Elf5	3.91315	0.00203461
Clca2	3.9858	0.000332053
Plekhd1	Inf	0.000608659
Rorb	Inf	0.00192341
Wfdc18	Inf	0.00279176
Vwc2	Inf	0.00405944
Tnfsf4	Inf	0.0081519
Dnajb13	Inf	0.0124627
Krt17	Inf	0.0178165
Gkn2	Inf	0.0291069
Slc14a1	Inf	0.0455651
Bglap	Inf	0.0464303
Ankrd35	Inf	0.0348187
AABR07067457.1	Inf	0.0386648
Pik3c2g	Inf	0.0386606
LOC100911068	Inf	0.0236234
-	Inf	0.0408993
Lipn	Inf	0.0221153
AABR07044001.4	Inf	0.0291581
Ctxn3	-3.59236		0.0100727
Sprn	-3.57374		0.0103503
AABR07027309.1	-3.47824		0.0166658
Cd6	-3.46228		0.0186069
Nanos3	-3.28561		0.0294682
Gdap1	-3.27569		0.0338503
Cngb1	-3.19785		0.0327182
Opn4	-3.19238		0.033834
Phex	-3.14223		0.025197
Tmem100	-2.966		0.0183369
LOC102553099	-2.76322		0.0258826
Baiap2l2	-2.71796		0.00341902
Gimap8	-2.63349		0.0319921
AC117058.1	-2.63077		0.0109434
Pdzd3	-2.56817		0.0253592
Cdh16	-2.52488		0.0119006
Ppp1r42	-2.41364		0.0109047
AABR07002337.1	-2.35372		0.0222597
Rn60_20_0051.7	-2.26013		0.0102215
Adad1	-2.14519		0.0380495
Tmem179	-2.13389		0.0101027
Slc12a8	-2.11356		0.000275889
Cldn5	-2.09991		5.17097e-05
Rdh5	-2.05713		0.00417806
Crhr2	-2.04344		0.0141563
Crispld1	-2.03836		0.00914582
Srsf12	-1.91599		0.00794682
AABR07008066.3	-1.88774		0.0165847
Plcxd3	-1.88456		0.00757208
Cmbl	-1.87895		0.0196319
Samd14	-1.83188		0.0015309
Gper1	-1.7438		0.0321055
Cyyr1	-1.73318		0.0408139
Nr0b2	-1.711		0.00714268
Marveld2	-1.67228		1.33528e-05
Hs3st3a1	-1.5792		0.0409551
Krt19	-1.57114		0.0185102
LOC688553	-1.56766		0.0220879
Gnaz	-1.56578		0.0263323
Mmp24	-1.56101		0.0498628
Eps8l1	-1.5521		0.0363654
Vps25	-1.55107		0.0151755
LOC100302465	-1.54952		0.0391254
Map2k6	-1.48762		0.00478279
Slc16a6	-1.45666		0.00317821
Ptpn20	-1.44219		0.00856512
Bfsp1	-1.43857		0.0108951
AC108546.1	-1.4166		0.0352959
Esyt3	-1.38886		0.00343508
Pigc	-1.36917		4.8396e-16
Fam217a	-1.36608		0.045803
Wdr66	-1.36255		0.0108259
Ddx3y	-1.34178		0.00203853
Prom1	-1.31973		0.00130996
Gp1bb	-1.26335		0.0170751
Pkdrej	-1.24821		0.0143383
Arhgef4	-1.22914		0.0337314
Gpr150	-1.18117		0.00179925
Ret	-1.13043		0.00559925
Ikzf2	-1.11155		0.0129437
Slc39a5	-1.11125		0.0118838
AC127756.1	-1.10749		0.00413156
Slc45a3	-1.09347		0.0206338
Cnih2	-1.08209		0.0349924
Syn1	-1.07247		0.00787779
Gramd2	-1.06608		0.00316478
Mybphl	-1.05492		0.0334854
Camk2n2	-1.04272		0.0109535
Rad51ap2	-1.03375		0.0423596
Spata1	-1.03256		0.0474228
Cyb561	-1.03183		0.01421
Tmem229a	-1.03078		0.0401124
Adhfe1	-1.02599		0.0424643
AABR07035802.1	-1.01018		0.0157573
AABR07001634.1	-1.00202		0.0187725
Fam170b	#NAME?		0.000729031
AABR07055191.1	#NAME?		0.00174594
Rxrg	#NAME?		0.00208167
Slc28a3	#NAME?		0.00354641
AABR07005837.2	#NAME?		0.00335437
Mybph	#NAME?		0.00605774
Galntl5	#NAME?		0.00605769
Ints1	#NAME?		0.00783251
Cracr2a	#NAME?		0.00800238
Clvs2	#NAME?		0.0108358
AABR07062694.1	#NAME?		0.0128161
Oprd1	#NAME?		0.0172491
RGD1309036	#NAME?		0.0184276
AABR07062775.1	#NAME?		0.0172346
Ckmt2	#NAME?		0.0188656
Rho	#NAME?		0.0402562
Nell1	#NAME?		0.0331187
Pdzd9	#NAME?		0.0218138
Apcdd1l	#NAME?		0.0384903
Fn3k	#NAME?		0.0331274
RGD1308112	#NAME?		0.0449156
LOC685081	#NAME?		0.0233112
RGD1304770	#NAME?		0.0234894
AC117065.1	#NAME?		0.0458824
Nkapl	#NAME?		0.0228398
AABR07071917.1	#NAME?		0.0384933
AABR07072264.3	#NAME?		0.0288384
AABR07049503.1	#NAME?		0.0288156

## Sheet: S2-H vs S2-N
gene name	log2FC	Pvalue-up	Pvalue-down
Serpinb2	1.265	0.0192723
Cxcl1	1.28506	0.0305864
Lvrn	1.21064	0.0242858
Dlx4	Inf	0.0153373
Dnase1	3.27212	0.0404144
Adra1a	3.43164	0.0416167
LOC361108	Inf	0.0242162
Ddit4l2	1.37874	0.00201341
Cel	1.27837	0.0474343
Pard6b	1.01718	0.0328139
Atp1b2	2.35107	0.00317653
Irx3	1.30456	0.0125289
Grin1	Inf	0.0480203
Spint1	3.64456	0.00732817
Slc6a12	1.14315	0.0103752
Paqr5	3.35789	0.0201158
Hp	1.12932	0.0418309
Fbp1	4.02086	0.000965242
Msx2	2.17841	0.00673875
Tgm1	2.3183	0.000423892
Phlda2	1.60217	0.0270523
Ovol1	Inf	0.00939391
Fgf21	3.77097	0.00844643
Lsr	3.28443	0.0333541
Zfp711	1.69162	0.017377
LOC691215	Inf	0.0142246
Tppp	2.49779	0.0410695
LOC682512	Inf	0.0256496
P2rx2	Inf	0.0300971
Cd86	1.06294	0.0419885
Slc44a5	3.50658	0.0108513
Klhdc4	Inf	0.00110916
Chrm2	1.34626	0.0412797
Nat8l	1.18224	0.0155552
Chrm3	Inf	0.0254445
Myl4	1.00328	0.0356661
Rn60_10_0890.5	Inf	0.0493791
G6pc	Inf	0.00181014
Nwd1	2.21539	0.0445331
AABR07030890.1	2.24238	0.0253511
Slco4a1	1.27421	0.0056576
Xkrx	1.96653	0.0383713
AABR07005593.1	2.44607	0.0478013
Fam73a	1.19428	0.0367422
Tmem52b	1.10188	0.0463267
AABR07010121.1	3.15769	0.0381909
Zdhhc23	Inf	0.0450445
LOC100910255	-7.76088		9.86389e-06
Slc16a6	-1.84202		0.00246397
Smpd3	-1.25173		0.0129145
RGD1310495	-1.44861		0.0050645
Gstt3	-2.94161		0.0165521
Thegl	-1.7152		0.0265578
Faslg	-2.81363		0.0138644
Slc6a4	-3.09459		0.0152435
Lct	#NAME?		0.036578
Map3k19	-2.64804		0.0296865
Bfsp1	-1.92823		0.0393038
Frmd3	-1.26525		0.0392723
Myo5c	-3.58971		0.0198187
Capn3	-3.29716		0.02844
Ccm2l	#NAME?		0.000842966
Clcnkb	-2.97072		0.0176213
Syn1	-1.30043		0.0105996
Tmod2	-1.0565		0.00167457
Oprd1	-2.11955		0.0231202
Rem2	-1.834		0.0438197
Perp	-3.59731		0.0165925
Snai3	-3.32787		0.0294895
Tmem25	-1.57852		0.00470444
Amhr2	#NAME?		0.041411
Adgrg1	-1.00419		0.006074
Ankdd1a	-3.14546		0.000802758
Gas2	-1.68103		0.00303782
Cacnb2	-1.851		0.0226379
Dlk2	-2.50668		0.014296
Ccdc24	#NAME?		0.0095093
Bglap	#NAME?		0.0402084
Disc1	-1.47268		0.00871765
Tssk4	-2.41188		0.0153199
Slc17a7	#NAME?		0.007162
Hist1h2af	-1.52121		0.0079676
Esyt3	-1.02139		0.0225061
Cep70	-1.12059		0.0150304
Rimbp2	#NAME?		0.0159213
Sp6	-1.99653		0.0400803
Fer1l5	-1.80582		0.036417
Shisa3	#NAME?		0.0366422
Tmem116	-1.98653		0.0175653
Slc51b	#NAME?		0.0250991
Nfasc	-2.05276		0.0475784
Ccl24	#NAME?		0.00710932
-	#NAME?		0.0236791
Ttc21a	-1.5722		0.00563832
AC097183.1	-1.34405		0.0412405
Calr4	-2.44875		0.032144
Ecscr	-1.31345		0.00498755
Abca17	#NAME?		0.0179511
Lmo3	-3.13156		0.0253335
AABR07020847.1	-1.8208		0.0348864
LOC102553099	-3.46589		0.030349
LOC100910772	-3.45134		0.0355631
Afmid	-1.38288		0.00524999
B4galnt4	-2.3413		0.0168813
AABR07065049.2	-3.16958		0.0150462
AABR07012065.1	#NAME?		0.028732
AABR07044049.1	-1.55084		0.0145644
Ccdc64	-4.46867		0.000228107
AABR07068590.1	#NAME?		0.041666
Akap3	-3.10061		0.00588127
Otx1	#NAME?		0.0366702
RT1-CE6	-1.4264		0.00162578

## Sheet: S3-H vs S3-N
gene name	log2FC	Pvalue-up	Pvalue-down
Olr1	1.07002	3.34833e-08
Taf9	1.82535	4.28668e-07
Esrp2	1.088	3.87706e-06
Rgs2	1.0254	5.16347e-06
Nr4a3	1.86637	6.95726e-06
Gnpnat1	1.15938	1.49317e-05
Slco4a1	1.42947	2.44328e-05
Tfpi2	1.3314	5.16234e-05
Rgs16	1.14797	6.48821e-05
Plekhs1	1.43708	0.000102466
Serpinb2	1.27483	0.000155584
Nkx6-1	2.60324	0.000215423
Trim72	Inf	0.000361094
Rn60_1_0435.2	1.20164	0.00055664
Il11	1.28674	0.000643403
Adrb1	1.52203	0.000809525
Cd101	2.88484	0.00086045
Cxcr4	1.07383	0.000936279
C1qc	2.45373	0.00161006
Gp1bb	2.06792	0.0016837
Csrnp1	1.1402	0.00178173
Socs1	1.41109	0.00200945
Hcar2	2.25136	0.00205119
Il6	1.22545	0.0026846
Krt23	2.10087	0.00352175
Cldn3	1.38565	0.00373338
Npas4	1.57889	0.00425008
Ptch2	2.05837	0.00542547
Lef1	1.31422	0.00564525
Vgll2	3.90209	0.00726762
Foxn1	1.28304	0.00733063
LOC498675	1.62859	0.0080286
Chrnb1	1.16036	0.00820016
LOC100911963	Inf	0.00886362
Chrdl2	3.00659	0.00959352
Grem2	1.00494	0.009957
LOC100362344	1.56927	0.0113679
Casz1	Inf	0.0119283
Gpr135	1.0028	0.0124916
Lhx4	Inf	0.0136027
Klhdc8a	3.45191	0.013881
AABR07030603.1	1.21952	0.0138937
Trpm3	1.51149	0.0140432
Prss56	Inf	0.014088
Fgf11	1.66515	0.0145288
Nptx2	1.12792	0.0146216
Ch25h	1.36656	0.0146784
C4bpb	Inf	0.0164431
LOC501233	2.68122	0.0171767
Ccdc103	2.70868	0.0177889
Lag3	1.61817	0.0185237
Ccdc94	1.48287	0.0193572
Muc13	Inf	0.0204759
Tgm1	1.30503	0.0214236
Trim9	1.7935	0.0222306
Syt1	2.01931	0.0242617
LOC500227	1.37969	0.0250765
Adrb3	Inf	0.0252821
Rn60_X_0713.5	Inf	0.0252679
Nup210l	2.47705	0.0253613
Tmem63c	Inf	0.0266314
Slc6a12	1.18745	0.0262934
Tnfsf15	1.23913	0.0268895
Plag1	1.36459	0.0272837
Siglec5	Inf	0.0283486
Oscar	1.06939	0.0288333
Cdh1	Inf	0.030067
Tmie	3.12075	0.0307703
Crct1	1.38254	0.0326049
Esrrb	Inf	0.0330348
LOC100364027	3.10779	0.0334258
Resp18	1.69949	0.0341826
Impg2	3.11953	0.0342759
Sncaip	2.59275	0.0346746
Perm1	3.04936	0.0378838
Xkr4	2.43565	0.0380965
Sncg	2.19107	0.0387169
Rims1	2.08837	0.0402804
Ankrd24	Inf	0.0421323
Plcd4	1.25677	0.0444047
AABR07066798.1	Inf	0.0439062
Lad1	Inf	0.0448395
Hs3st6	Inf	0.0450423
Arid4b	1.73875	0.0451767
Slc38a5	2.74248	0.0498034
Smpd3	-4.00661		1.20442e-11
Adamts15	-1.49706		5.56923e-10
Dixdc1	-1.11606		3.44758e-07
Dhrs3	-1.4481		4.66678e-06
Spta1	-2.06434		1.68866e-05
Ccdc37	-1.44007		1.704e-05
Drp2	-1.4881		1.49063e-05
Arhgap20	-1.30565		3.12709e-05
Pik3ip1	-1.07452		4.07834e-05
Fam198a	-2.52528		5.03462e-05
AABR07012047.1	-1.06073		7.85712e-05
Rn60_2_1764.2	-2.05894		8.37657e-05
LOC100910255	-6.52806		0.000102388
Clcn4	-1.50873		0.000144655
LOC691083	-1.34479		0.00015629
Synpo2	-1.31558		0.00023144
Clmn	-1.28206		0.0003556
Pdzd7	-3.49302		0.000415294
Zfp964	-1.14632		0.000647405
Ppp1r42	#NAME?		0.000728281
Slc6a7	-1.17292		0.000735641
RGD1559575	-4.04246		0.000790965
Mettl15	-1.01287		0.00101582
Htr2b	-1.14771		0.00105657
Adamts3	-1.18215		0.00108
Cyp2d4	-2.68571		0.00132371
Aqp11	-1.63285		0.00154554
Map2k6	-1.53174		0.00168451
Ribc1	-1.30148		0.00207992
Mfsd4	-2.69754		0.00196627
Strip2	-1.34475		0.00187704
Tsga10	-1.87144		0.0019948
Wnt10b	#NAME?		0.00204625
Shbg	-2.22444		0.00215911
Slc23a3	-1.66796		0.00229139
Kcnn1	-1.25327		0.00249097
Fam13c	-1.11449		0.00372249
LOC497899	-1.04477		0.00374843
Slc8a3	-2.00957		0.00384753
Ntf3	-2.45753		0.00386809
Sh2d2a	-1.3766		0.00410049
Ednra	-1.31468		0.00413029
Cer1	-3.65858		0.00438263
RGD1307391	-2.64666		0.00456255
Rad9b	-1.12653		0.00512168
Mx1	-1.05274		0.00538555
RGD1562963	-1.83921		0.00552336
AC127756.1	-1.41107		0.00611658
Magee2	-1.46363		0.006479
Tc2n	-1.75798		0.00677302
RT1-M2	#NAME?		0.00709372
Megf6	-2.11819		0.00743187
Tnfrsf4	-1.56205		0.00738438
C2	-3.37227		0.00742532
Spns2	-1.27151		0.00779579
MGC109340	-1.54004		0.00792601
AABR07000385.2	#NAME?		0.00794223
Adcy10	-1.27659		0.00802648
Mfrp	-1.01902		0.00827693
AABR07042904.1	-1.32175		0.00940759
Daw1	-1.03067		0.00975445
Ccdc27	-2.46093		0.0100845
Camk2a	-1.3024		0.0101683
AC099449.1	-1.68039		0.0103805
Cdhr2	-1.1224		0.0110457
Svip	-2.51677		0.0110834
Ccer2	-2.47508		0.0113897
LOC684238	-3.88285		0.0122186
Klhdc9	-1.39586		0.0126674
Batf	-2.2622		0.0126965
Cdnf	-1.04395		0.012959
Mycbpap	-1.11695		0.0130296
Arhgef37	-1.50872		0.0134231
Bcl11a	#NAME?		0.0143893
AABR07062833.1	-2.96577		0.015786
Prkcg	-1.39168		0.0159749
AABR07068590.1	#NAME?		0.0161495
Acacb	-1.05466		0.0166964
Nudt6	-1.08372		0.0170134
Megf10	-2.21911		0.017129
Fgd2	-2.451		0.0173785
Ablim2	-1.3478		0.0182549
Rgs22	-2.12763		0.0180669
Kcnk15	-2.29156		0.0188169
Tnfsf13b	-1.36757		0.0192853
Ptges	-1.46012		0.0195102
Slc44a4	#NAME?		0.0204712
AABR07002885.1	#NAME?		0.0204497
Asgr1	-2.49162		0.0209736
Trim29	-1.52038		0.0212637
Prtg	-2.87846		0.0219316
Slc12a8	-1.13958		0.0227694
Wnt3	#NAME?		0.0229386
Gyltl1b	-1.84621		0.0229592
Cgn	-1.11681		0.0231151
Emid1	#NAME?		0.0229378
Bfsp1	-2.49312		0.023697
AABR07049148.1	-3.40915		0.0255998
Epb42	-1.89948		0.0256502
Fam65b	-1.44826		0.0262722
Plac8l1	#NAME?		0.0264837
Ano4	-1.07265		0.027016
RGD1560207	-1.01147		0.0272366
Hsd11b2	-2.37558		0.0279354
Slc27a6	-2.36779		0.0296366
Adra1d	-2.2076		0.0298365
RGD1565367	-1.2375		0.0301926
Edar	-1.39903		0.0312588
Yipf7	#NAME?		0.032946
Fgf14	#NAME?		0.033
Prrt1	-1.54531		0.034919
Sprn	-1.79004		0.0352646
Hist3h3	-1.63183		0.0368698
Osm	-1.10085		0.0370622
Slc16a6	-1.5017		0.0379638
Chd5	#NAME?		0.0378748
Ppp2r2c	#NAME?		0.0378954
-	-3.43618		0.0382382
Mpv17l	-1.951		0.0389679
Car4	-2.27182		0.0390663
Btbd16	-2.2817		0.0395084
AABR07012023.1	-3.11372		0.0396845
LOC100362109	-2.43353		0.0400503
Cgnl1	-1.0564		0.0403523
LOC680693	-2.17515		0.0417786
Dtna	-1.02432		0.0420806
LOC103691893	-2.43234		0.0419634
Abcb9	-1.0003		0.0426418
Zbtb8b	-1.48668		0.0426229
Oas1k	-1.012		0.0427146
Smtnl2	-1.36081		0.0432898
Rab25	-1.29818		0.0442622
Apol3	-1.43375		0.0441937
Ddx43	#NAME?		0.0441748
LOC681458	-1.87416		0.0450015
Tekt1	-1.13014		0.0473386
Syt8	-3.60809		0.0466786
Gpr88	-1.10742		0.0474045
-	-1.15438		0.0472122
Soga3	-1.11662		0.0489502
Best2	#NAME?		0.0494827
Rab19	#NAME?		0.0495074
Myo16	#NAME?		0.0494956

## Sheet: S4-H vs S4-N
gene name	log2FC	Pvalue-up	Pvalue-down
Rps20	1.07599	0.000146401
Hoxd13	1.39165	0.0257999
Nmu	1.09609	0.0134791
Rhoh	2.54614	0.0250122
Rassf6	Inf	0.0347721
Car4	Inf	0.0422626
Slc25a47	Inf	0.0226361
Erbb3	1.31204	0.0257452
Lrrc69	Inf	0.0422714
Plag1	1.25034	0.020066
1700109H08Rik	Inf	0.00600925
Il22ra2	Inf	0.0397761
Slc6a12	1.75381	0.0126025
Dok3	1.01966	0.0429103
Ctrc	1.96383	0.00405617
Dusp2	1.08411	0.0405669
Cml3	Inf	0.0268973
Prkcq	1.18918	0.0221822
Ocstamp	1.15907	0.0469137
Htr4	Inf	0.0191408
Lrrc4b	1.59698	0.0415888
Tmem145	Inf	0.0445327
Sez6l	2.66981	0.049105
Olig1	Inf	0.0102014
Gbp4	1.45777	0.0481295
Thsd7a	1.01498	0.0067777
AABR07004397.1	Inf	0.0448475
Havcr2	2.15806	0.00985288
Klra2	Inf	0.0251201
Tmprss9	2.16248	0.0137848
RGD1560470	1.06687	0.0103367
Npb	2.55595	0.0129158
Plekhd1	2.41307	0.0167719
Prss22	Inf	0.0150584
LOC498675	1.2342	0.0468179
Foxg1	3.3041	0.0287546
Emr4	Inf	0.0235383
Vps25	1.10526	0.0432331
AABR07002885.1	1.89562	0.0463904
Dhh	1.44082	0.0456623
Tnip3	1.09663	0.0225523
AABR07049148.1	Inf	0.0286061
Nup210l	1.40636	0.0432609
Ttc23l	Inf	0.0137556
AC105485.2	Inf	0.0450316
SNORA27	1.76868	0.0481121
AC106292.2	Inf	0.0262934
AABR07027870.2	1.05616	0.0492718
Drp2	-1.26623		0.000145834
Tmie	#NAME?		0.000230317
Fam198a	-2.04807		0.000463126
Abhd3	-1.16264		0.000769334
Slc16a6	-1.59554		0.00834671
Smpd3	-1.19585		0.00184707
Fgd2	-1.60708		0.0408076
Phkg1	-1.42517		0.0242137
Srrm4	#NAME?		0.034524
Tnn	-1.52126		0.0378163
Magea11	#NAME?		0.0233812
Wnt16	#NAME?		0.0263345
Slurp1	-3.62368		0.0233012
Unc79	-1.94365		0.00593915
Clip4	#NAME?		0.00512052
Arpp21	-1.24831		0.0236753
Dnase1l3	-3.39728		0.0375659
Prr15	-3.24453		0.0279492
Kcnh2	-1.65503		0.00827118
Oprd1	-1.627		0.039767
Scg3	-2.92506		0.0231654
Clmn	-1.41746		0.00526151
Aldh1b1	#NAME?		0.0284258
Col9a2	-1.88426		0.035259
Grin1	-1.83448		0.0199158
Slc36a2	#NAME?		0.0347142
Rrad	-2.10743		0.0292606
Ppm1j	-1.27275		0.0211873
Gpr18	#NAME?		0.0414218
Ednra	-1.11254		0.0148706
Mlf1	-1.38029		0.0322574
Ntrk1	-1.83065		0.036891
Ddb2	-1.09514		0.0109993
Rnf151	-1.49355		0.00636927
Tmem25	-1.3268		0.00789099
Trim66	-1.3722		0.0345869
Plcxd3	-2.76495		0.00974186
Dnaaf1	-3.53829		0.0115679
Sigirr	-2.44623		0.00611921
Gucy2g	-3.5881		0.00432582
Wnk2	-1.90366		0.0362149
Adamts16	#NAME?		0.00161593
Hist1h1a	-2.63464		0.0202799
Il34	-1.1192		0.032064
Slc12a5	-1.87819		0.00531681
Tmem221	#NAME?		0.0068668
C1qtnf3	-1.74273		0.00386242
AABR07071746.1	-1.86449		0.0226106
Zfp385b	-2.66696		0.0158454
Pcdh12	-1.88189		0.00676297
Tas1r3	#NAME?		0.0102588
Artn	-1.0497		0.0429306
Rhbdl1	-1.26114		0.0192768
Il4i1	-1.1245		0.0260405
Tulp2	-2.05472		0.0326945
Mzb1	#NAME?		0.0399782
Zmynd12	-1.03542		0.00539233
Rad21l1	-3.53832		0.00855558
Skint10	-1.90355		0.0138298
Raet1d	-1.08206		0.0207065
Ccdc155	-1.27387		0.0231055
Pkd2l2	-1.89952		0.028465
Wdr86	#NAME?		0.0263293
Ms4a14	-3.66169		0.0234446
Ip6k3	#NAME?		0.0462079
Gpr137c	#NAME?		0.0451318
Xrra1	-2.55484		0.026054
Hcar2	-2.05003		0.0422026
Scn4b	-2.75284		0.00270739
Lhfpl1	#NAME?		0.00401328
Txndc2	#NAME?		0.0451457
Bcl2l14	-1.97488		0.00629997
Xkr5	-1.05794		0.00962753
Dgkb	-2.77032		0.0272831
Grid2ip	#NAME?		0.045633
Cngb1	-3.00516		0.00970164
Cyp2d4	-3.28021		0.0125063
Oas1k	-1.62871		0.0481231
LOC680693	-2.09202		0.0206221
Fscn2	-2.58711		0.00795804
Clca4l	-1.14059		0.0329751
LOC502618	#NAME?		0.0179835
Btnl3	#NAME?		0.0241089
Vnn3	-1.18234		0.014444
Icam4	-1.41972		0.0471076
Acsm1	-1.84524		0.0200784
Efcab2	-1.80631		0.0195166
Rnf180	-3.13407		0.0235146
Apoa1	-2.02819		0.0165132
Syt14	-1.16444		0.0365066
Rn60_9_0428.1	-1.93379		0.00607912
MGC109340	-1.22727		0.0370516
Hba2	#NAME?		0.0219823
Afmid	-1.0423		0.0173524
Vom2r35	#NAME?		0.0414486
G6pc	-2.4701		0.0290478
SCARNA2	-1.92497		0.0291913
AABR07025386.1	-1.40813		0.00649952
SNORA75	-3.27813		0.0161423
AABR07070518.1	-1.51819		0.0413277
AABR07062800.1	-3.26256		0.042086
AABR07068030.1	-2.61164		0.00298637
AABR07027371.1	-2.60566		0.0200361
Nkapl	#NAME?		0.0254175
AABR07006097.1	#NAME?		0.0463924
U6	-2.24338		0.0197584
Spef2	#NAME?		0.0451511
AABR07044418.1	#NAME?		0.040976
Akap3	-2.59042		0.00143445
Rn60_9_0975.2	-1.24637		0.0126495
Asic1	-3.3448		0.0172392
AC097038.1	#NAME?		0.0451385
Asz1	#NAME?		0.039973
AABR07070161.7	#NAME?		0.0460333
AABR07068214.1	#NAME?		0.0279692
Rsph6a	#NAME?		0.00262476
AABR07041724.2	-2.97402		0.0358321
