# Supplementary material for: Effect of high glucose on the gene expression profiling in cardiac fibroblasts from rats at different ages
Source: PeerJ journal article supplement (doi:10.7717/peerj.19040), 2025-03-03
Supplement: MIQE_checklist.xls [file MIQE_checklist.xls]

## Sheet: Sheet1
ITEM TO CHECK	IMPORTANCE	CHECKLIST	Location
EXPERIMENTAL DESIGN
Definition of experimental and control groups	E	No control group	line 139-161
Number within each group	E	3 with each group	line 165
Assay carried out by core lab or investigator's lab?	D	N/A	N/A
Acknowledgement of authors' contributions	D	N/A	N/A
SAMPLE
Description	E	cell resource	line 139-161
Volume/mass of sample processed	D	N/A	N/A
Microdissection or macrodissection	E	Cell resources	line 139-161
Processing procedure	E	Cell resources	line 139-161
If frozen - how and how quickly?	E	Cell resources	line 139-161
If fixed - with what, how quickly?	E	Cell resources	line 139-161
Sample storage conditions and duration (especially for FFPE samples)	E	Cell resources	line 139-161
NUCLEIC ACID EXTRACTION
Procedure and/or instrumentation	E	Lyse cells, remove DNA, remove protein and salt, elute RNA; centrifuge, DNA-Cleaning Column, RNA-only Column	line 215-221
Name of kit and details of any modifications	E	Eastep® Super Total RNA Extraction Kit	line 215-221
Source of additional reagents used	D	N/A	N/A
Details of DNase or RNAse treatment	E	DNase I buffer and Cleaning Column	line 215-221
Contamination assessment (DNA or RNA)	E	DNA	line 215-221
Nucleic acid quantification	E	NanoDrop, RNA measure	line 215-221
Instrument and method	E	Spectrophotometry (Eppendorf)	line 215-221
Purity (A260/A280)	D	N/A	N/A
Yield	D	N/A	N/A
RNA integrity method/instrument	E	N/A	N/A
RIN/RQI or Cq of 3' and 5' transcripts	E	N/A	N/A
Electrophoresis traces	D	N/A	N/A
Inhibition testing (Cq dilutions, spike or other)	E	N/A	N/A
REVERSE TRANSCRIPTION
Complete reaction conditions	E	37℃, 15min; 85℃, 5s; 4℃, forever	line 215-221
Amount of RNA and reaction volume	E	0.5ug, 10ul	line 215-221
Priming oligonucleotide (if using GSP) and concentration	E	0.5ug total RNA and 2ul 5×PrimeScript RT Master Mix add ddH2O to 10ul. Gently mixed for reverse transcription reaction: 37° 15min, 85° 5sec, 4° forever	line 215-221
Reverse transcriptase and concentration	E	N/A	line 215-221
Temperature and time	E	37℃, 15min; 65℃, 5s; 4℃, forever	line 215-221
Manufacturer of reagents and catalogue numbers	D	Takara, RR037A	line 215-221
Cqs with and without RT	D*	N/A	N/A
Storage conditions of cDNA	D	-80℃	line 215-221
qPCR TARGET INFORMATION
If multiplex, efficiency and LOD of each assay.	E	N/A	N/A
Sequence accession number	E	N/A	N/A
Location of amplicon	D	N/A	N/A
Amplicon length	E	75-143bp	line 215-221
In silico specificity screen (BLAST, etc)	E	N/A	N/A
Pseudogenes, retropseudogenes or other homologs?	D	N/A	N/A
Sequence alignment	D	N/A	N/A
Secondary structure analysis of amplicon	D	N/A	N/A
Location of each primer by exon or intron (if applicable)	E	N/A	N/A
What splice variants are targeted?	E	N/A	N/A
qPCR OLIGONUCLEOTIDES
Primer sequences	E	Table 1 in supplymentary file	Table 1 in supplymentary file
RTPrimerDB Identification Number	D	N/A	N/A
Probe sequences	D**	N/A	N/A
Location and identity of any modifications	E	None	N/A
Manufacturer of oligonucleotides	D	N/A	N/A
Purification method	D	N/A	N/A
qPCR PROTOCOL
Complete reaction conditions	E	A total of 10ul of the reaction volume was used for qPCR. 0.5ul of cDNA, 0.4ul of each primer, 3.7ul of ddH2O and 5ul 2×TB Green® Premix Ex Taq™. All qPCR reaction were performed on Bio-Rad T100 Thermal Cycler(Bio-Rad, CA, United States), using the following condition: 95°for 30s, followed by 40 cycle at 95°for 5s and 60°for 30s.	line 215-221
Reaction volume and amount of cDNA/DNA	E	Reaction volum 10ul. Amount of cDNA :0.5ul.	line 215-221
Primer, (probe), Mg++ and dNTP concentrations	E	10μM	line 215-221
Polymerase identity and concentration	E	2×TB Green Premix Ex Taq (Tli RNaseH Plus)	line 215-221
Buffer/kit identity and manufacturer	E	Takara	line 215-221
Exact chemical constitution of the buffer	D	N/A	N/A
Additives (SYBR Green I, DMSO, etc.)	E	N/A	N/A
Manufacturer of plates/tubes and catalog number	D	GenXion	line 215-221
Complete thermocycling parameters	E	95°for 30s, followed by 40 cycle at 95°for 10s and 60°for 30s.
Reaction setup (manual/robotic)	D	manual	line 215-221
Manufacturer of qPCR instrument	E	Bio-Rad	line 215-221
qPCR VALIDATION
Evidence of optimisation (from gradients)	D	N/A	N/A
Specificity (gel, sequence, melt, or digest)	E	Melt	line 215-221
For SYBR Green I, Cq of the NTC	E	We did not set NTC	line 215-221
Standard curves with slope and y-intercept	E	N/A	N/A
PCR efficiency calculated from slope	E	N/A	N/A
Confidence interval for PCR efficiency or standard error	D	N/A	N/A
r2 of standard curve	E	N/A	N/A
Linear dynamic range	E	N/A	N/A
Cq variation at lower limit	E	N/A	N/A
Confidence intervals throughout range	D	N/A	N/A
Evidence for limit of detection	E	N/A	N/A
If multiplex, efficiency and LOD of each assay.	E	N/A	N/A
DATA ANALYSIS
qPCR analysis program (source, version)	E	LightCycler 480	line 215-221
Cq method determination	E	Standard Curve	line 215-221
Outlier identification and disposition	E	Delete	line 215-221
Results of NTCs	E	N/A	N/A
Justification of number and choice of reference genes	E	GAPDH	line 220-221
Description of normalisation method	E	2-ΔΔCt method	line 215-221
Number and concordance of biological replicates	D	N/A	N/A
Number and stage (RT or qPCR) of technical replicates	E	3	line 165
Repeatability (intra-assay variation)	E	mean standard error of mean of triplicates	line 223
Reproducibility (inter-assay variation, %CV)	D	N/A	N/A
Power analysis	D	N/A	N/A
Statistical methods for result significance	E	t test	line 225
Software (source, version)	E	Graphpad Prism 8	line 223
Cq or raw data submission using RDML	D	N/A	N/A
Table 1. MIQE checklist for authors, reviewers and editors. All essential information (E) must be submitted with the manuscript. Desirable
information (D) should be submitted if available. If using primers obtained from RTPrimerDB, information on qPCR target, oligonucleotides,
protocols and validation is available from that source.
*: Assessing the absence of DNA using a no RT assay is essential when first extracting RNA. Once the sample has been validated as
RDNA-free, inclusion of a no-RT control is desirable, but no longer essential.
**: Disclosure of the probe sequence is highly desirable and strongly encouraged. However, since not all commercial pre-designed assay
vendors provide this information, it cannot be an essential requirement. Use of such assays is advised against.
