# Supplementary material for: Effect of high glucose on the gene expression profiling in cardiac fibroblasts from rats at different ages
Source: PeerJ journal article supplement (doi:10.7717/peerj.19040), 2025-03-03
Supplement: Raw_data_of_qPCR.xlsx [file Raw_data_of_qPCR.xlsx]

## Sheet: Ct
S1-N vs S1-H
		Il6	Ccl2	Ccl20	Cxcl1	Cxcl3	Aldh3A1	Gapdh
S1-N	S1-N1	27.09	20.57	28.05	26.24	26.98	30.67	21.76
		27.22	20.54	27.99	26.25	27.15	31.5	21.77
	S1-N2	27.15	20.52	27.98	26.31	27.11	30.42	21.76
		27.28	20.54	27.97	26.24	27.01	31.18	21.75
	S1-N3	24.99	18.57	26.03	24.19	25.11	28.96	20.06
		25.23	18.61	25.67	23.99	25	28.35	19.92
S1-H	S1-H1	25.65	19.26	26.14	23.07	25.59	29.03	20.97
		25.75	19.25	26.15	23.09	25.61	28.97	20.94
	S1-H2	25.6	19.26	26.18	23.07	25.47	29.11	20.97
		25.82	19.27	26.24	23.11	25.54	29.17	20.98
	S1-H3	23.67	17.85	24.04	20.74	23.58	27.15	19.36
		23.28	17.7	24.29	20.82	23.79	27.14	19.49
S2-N vs S2-H
		Atp1b2	Gapdh
S2-N	S2-N1	35	24.03
		34.03	23.92
	S2-N2	35	24.06
		35	24.05
	S2-N3	28.96	20.84
		28.35	21.29
S2-H	S2-H1	30.97	22.6
		31.26	22.54
	S2-H2	30.97	22.68
		30.89	22.7
	S2-H3	27.15	21.3
		27.14	21.37
S3-N vs S3-H
		Lef1	Gapdh
S3-N	S3-N1	32.2	24.61
		33.88	24.62
	S3-N2	34.15	24.7
		33.22	24.7
	S3-N3	29.96	23.02
		31.04	22.98
S3-H	S3-H1	32.39	22.59
		32.46	22.63
	S3-H2	31.93	22.58
		32.27	22.61
	S3-H3	29.51	21.02
		29.09	20.76
S4-N vs S4-H
		Erbb3	Prckq	Dbd2	Gapdh
S4-N	S4-N1	33.34	32.8	35	22.44
		32.68	32.92	34	22.5
	S4-N2	32.01	34.07	35	22.48
		32.9	35	35	22.55
	S4-N3	29.63	30.81	31.73	20.55
		30.21	30.07	31.32	20.75
S4-H	S4-H1	31.24	31.95	31.52	21.69
		31.57	33.77	32.84	21.8
	S4-H2	31.57	33.05	33.33	21.74
		31.64	32.23	32.84	21.88
	S4-H3	29.51	32.69	32.21	20.55
		29.56	33.43	32.47	20.62
Note: Every group has 3 biological replicates, and multiple holes were set.


## Sheet: Calculation of relative express
	Input Ct value				Average		Standard deviation		△				△△Ct±△SD		Final results			Relative expression after normalization
Sample number	Objective gene Ct (parallel hole)		Internal reference Ct (parallel hole)		Objective gene	Internal reference gene	Objective gene	Internal reference gene	△Ct	△SD	reference	△△Ct	minus	add	Reletive expression	Positive deviation	Negative deviation		N group			H group
Il6	2	2	1	1	2	1	0	0	1	0	1	0	0	0	1	0	0
1-N1	27.09	27.15	21.76	21.76	27.12	21.76	0.0424264	0	5.36	0.0424264	5.36	0	-0.0424264	0.0424264	1	0.0298444	0.0289795	1	0.96936		2.81864	2.73228
1-N1	27.22	27.28	21.77	21.75	27.25	21.76	0.0424264	0.0141421	5.49	0.0447214	5.36	0.13	0.0852786	0.174721	0.913831	0.028771	0.0278928	0.913831	0.885832		2.52275	2.44546
1-N1	24.99	25.23	20.06	19.92	25.11	19.99	0.0424264	0.0989949	5.12	0.107703	5.36	-0.24	-0.347703	-0.132297	1.18099	0.0915405	0.0849555	1.18099	1.14481		2.47942	2.40345
1-H2	25.65	25.6	21.76	21.76	25.625	21.76	0.0353553	0	3.865	0.0353553	5.36	-1.495	-1.53036	-1.45964	2.81864	0.0699283	0.0682354	1.03161
1-H2	25.75	25.82	21.77	21.75	25.785	21.76	0.0494975	0.0141421	4.025	0.0514782	5.36	-1.335	-1.38648	-1.28352	2.52275	0.091642	0.0884297
1-H2	23.67	23.28	19.36	19.49	23.475	19.425	0.275772	0.0919239	4.05	0.290689	5.36	-1.31	-1.60069	-1.01931	2.47942	0.553465	0.452464
Ccl2	2	2	1	1	2	1	0	0	1	0	1	0	0	0	1	0	0
1-N1	20.57	20.54	21.76	21.76	20.555	21.76	0.0212132	0	-1.205	0.0212132	-1.205	0	-0.0212132	0.0212132	1	0.0148125	0.0145963	1	0.96936		2.46229	2.38685
1-N1	20.52	20.54	21.77	21.75	20.53	21.76	0.0141421	0.0141421	-1.23	0.02	-1.205	-0.025	-0.045	-0.005	1.01748	0.0142035	0.0140079	1.01748	0.986305		2.44528	2.37036
1-N1	18.57	18.61	20.06	19.92	18.59	19.99	0.0282843	0.0989949	-1.4	0.102956	-1.205	-0.195	-0.297956	-0.0920437	1.14472	0.0846775	0.0788451	1.14472	1.10965		1.36131	1.3196
1-H2	19.26	19.25	21.76	21.76	19.255	21.76	0.00707107	0	-2.505	0.00707107	-1.205	-1.3	-1.30707	-1.29293	2.46229	0.012098	0.0120389	1.05407
1-H2	19.26	19.27	21.77	21.75	19.265	21.76	0.00707107	0.0141421	-2.495	0.0158114	-1.205	-1.29	-1.30581	-1.27419	2.44528	0.0269467	0.026653
1-H2	17.85	17.7	19.36	19.49	17.775	19.425	0.106066	0.0919239	-1.65	0.140357	-1.205	-0.445	-0.585357	-0.304643	1.36131	0.139096	0.126201
Ccl20	2	2	1	1	2	1	0	0	1	0	1	0	0	0	1	0	0
1-N1	28.05	27.99	21.76	21.76	28.02	21.76	0.0424264	0	6.26	0.0424264	6.26	0	-0.0424264	0.0424264	1	0.0298444	0.0289795	1	0.96936		3.66802	3.55563
1-N1	27.98	27.97	21.77	21.75	27.975	21.76	0.00707107	0.0141421	6.215	0.0158114	6.26	-0.045	-0.0608114	-0.0291886	1.03168	0.011369	0.0112451	1.03168	1.00007		3.50642	3.39899
1-N1	26.03	25.67	20.06	19.92	25.85	19.99	0.254558	0.0989949	5.86	0.27313	6.26	-0.4	-0.67313	-0.12687	1.31951	0.275021	0.227586	1.31951	1.27908		2.86791	2.78004
1-H2	26.14	26.15	21.76	21.76	26.145	21.76	0.00707107	0	4.385	0.00707107	6.26	-1.875	-1.88207	-1.86793	3.66802	0.0180221	0.017934	1.11706
1-H2	26.18	26.24	21.77	21.75	26.21	21.76	0.0424264	0.0141421	4.45	0.0447214	6.26	-1.81	-1.85472	-1.76528	3.50642	0.110396	0.107026
1-H2	24.04	24.29	19.36	19.49	24.165	19.425	0.176777	0.0919239	4.74	0.199249	6.26	-1.52	-1.71925	-1.32075	2.86791	0.424738	0.369949
Cxcl1	2	2	1	1	2	1	0	0	1	0	1	0	0	0	1	0	0
1-N1	26.24	26.25	21.76	21.76	26.245	21.76	0.00707107	0	4.485	0.00707107	4.485	0	-0.00707107	0.00707107	1	0.00491332	0.0048893	1	0.96936		9.03172	8.75499
1-N1	26.31	26.24	21.77	21.75	26.275	21.76	0.0494975	0.0141421	4.515	0.0514782	4.485	0.03	-0.0214782	0.0814782	0.97942	0.0355786	0.0343315	0.97942	0.949411		8.84585	8.57481
1-N1	24.19	23.99	20.06	19.92	24.09	19.99	0.141421	0.0989949	4.1	0.172627	4.485	-0.385	-0.557627	-0.212373	1.30586	0.165986	0.147267	1.30586	1.26585		8.75435	8.48612
1-H2	23.07	23.07	21.76	21.76	23.07	21.76	0	0	1.31	0	4.485	-3.175	-3.175	-3.175	9.03172	0	0	1.09509
1-H2	23.09	23.11	21.77	21.75	23.1	21.76	0.0141421	0.0141421	1.34	0.02	4.485	-3.145	-3.165	-3.125	8.84585	0.123483	0.121783
1-H2	20.74	20.82	19.36	19.49	20.78	19.425	0.0565685	0.0919239	1.355	0.107935	4.485	-3.13	-3.23794	-3.02206	8.75435	0.680079	0.631056
Cxcl3	2	2	1	1	2	1	0	0	1	0	1	0	0	0	1	0	0
1-N1	26.98	27.11	21.76	21.76	27.045	21.76	0.0919239	0	5.285	0.0919239	5.285	0	-0.0919239	0.0919239	1	0.0657905	0.0617293	1	0.96936		2.85799	2.77042
1-N1	27.15	27.01	21.77	21.75	27.08	21.76	0.0989949	0.0141421	5.32	0.1	5.285	0.035	-0.065	0.135	0.976032	0.0700532	0.0653619	0.976032	0.946127		2.77022	2.68534
1-N1	25.11	25	20.06	19.92	25.055	19.99	0.0777817	0.0989949	5.065	0.125897	5.285	-0.22	-0.345897	-0.0941032	1.16473	0.106207	0.0973319	1.16473	1.12905		2.03496	1.97261
1-H2	25.59	25.47	21.76	21.76	25.53	21.76	0.0848528	0	3.77	0.0848528	5.285	-1.515	-1.59985	-1.43015	2.85799	0.173136	0.163246	1.04692
1-H2	25.61	25.54	21.77	21.75	25.575	21.76	0.0494975	0.0141421	3.815	0.0514782	5.285	-1.47	-1.52148	-1.41852	2.77022	0.100631	0.097104
1-H2	23.58	23.79	19.36	19.49	23.685	19.425	0.148492	0.0919239	4.26	0.174642	5.285	-1.025	-1.19964	-0.850358	2.03496	0.261868	0.232012
Aldh3A1	2	2	1	1	2	1	0	0	1	0	1	0	0	0	1	0	0
1-N1	30.67	31.5	21.76	21.76	31.085	21.76	0.586899	0	9.325	0.586899	9.325	0	-0.586899	0.586899	1	0.502014	0.334227	1	0.96936		4.04181	3.91797
1-N1	30.42	31.18	21.77	21.75	30.8	21.76	0.537401	0.0141421	9.04	0.537587	9.325	-0.285	-0.822587	0.252587	1.21841	0.550164	0.37902	1.21841	1.18108		4.04181	3.91797
1-N1	28.96	28.35	20.06	19.92	28.655	19.99	0.431335	0.0989949	8.665	0.442549	9.325	-0.66	-1.10255	-0.217451	1.58008	0.567256	0.417405	1.58008	1.53167		3.04196	2.94875
1-H2	29.03	29.11	21.76	21.76	29.07	21.76	0.0565685	0	7.31	0.0565685	9.325	-2.015	-2.07157	-1.95843	4.04181	0.161629	0.155414	1.26616
1-H2	28.97	29.17	21.77	21.75	29.07	21.76	0.141421	0.0141421	7.31	0.142127	9.325	-2.015	-2.15713	-1.87287	4.04181	0.418451	0.379193
1-H2	27.15	27.14	19.36	19.49	27.145	19.425	0.00707107	0.0919239	7.72	0.0921954	9.325	-1.605	-1.6972	-1.5128	3.04196	0.200742	0.188315
Atp1b2	2	2	1	1	2	1	0	0	1	0	1	0	0	0	1	0	0
2-N1	35	35	24.03	24.06	35	24.045	0	0.0212132	10.955	0.0212132	10.955	0	-0.0212132	0.0212132	1	0.0148125	0.0145963	1	1.03027		6.16884	6.35556
2-N1	34.03	35	23.92	24.05	34.515	23.985	0.685894	0.0919239	10.53	0.692026	10.955	-0.425	-1.11703	0.267026	1.34257	0.826421	0.511542	1.34257	1.38321		5.65685	5.82808
2-N1	30.74	30.62	20.84	21.29	30.68	21.065	0.0848528	0.318198	9.615	0.329317	10.955	-1.34	-1.66932	-1.01068	2.53151	0.649128	0.516649	2.53151	2.60814		10.3031	10.6149
2-H1	30.97	30.97	22.6	22.68	30.97	22.64	0	0.0565685	8.33	0.0565685	10.955	-2.625	-2.68157	-2.56843	6.16884	0.246687	0.237202	1.6247
2-H1	31.26	30.89	22.54	22.7	31.075	22.62	0.26163	0.113137	8.455	0.285044	10.955	-2.5	-2.78504	-2.21496	5.65685	1.23572	1.01418
2-H1	29.34	29.24	21.7	21.7	29.29	21.7	0.0707107	0	7.59	0.0707107	10.955	-3.365	-3.43571	-3.29429	10.3031	0.517563	0.492807
Lef1	2	2	1	1	2	1	0	0	1	0	1	0	0	0	1	0	0
3-N1	32.2	33.88	24.61	24.7	33.04	24.655	1.18794	0.0636396	8.385	1.18964	8.385	0	-1.18964	1.18964	1	1.28096	0.561589	1	1.03027		0.438303	0.451569
3-N1	34.15	33.22	24.62	24.7	33.685	24.66	0.657609	0.0565685	9.025	0.660038	8.385	0.64	-0.0200379	1.30004	0.641713	0.372273	0.235597	0.641713	0.661136		0.389582	0.401374
3-N1		31.04	23.02	22.98	31.04	23	#DIV/0!	0.0282843	8.04	#DIV/0!	8.385	-0.345	#DIV/0!	#DIV/0!	1.27015	#DIV/0!	#DIV/0!	1.27015	1.3086		0.982821	1.01257
3-H1	32.39	31.93	22.59	22.58	32.16	22.585	0.325269	0.00707107	9.575	0.325346	8.385	1.19	0.864654	1.51535	0.438303	0.110875	0.0884903	0.970621
3-H1	32.46	32.27	22.63	22.61	32.365	22.62	0.13435	0.0141421	9.745	0.135093	8.385	1.36	1.22491	1.49509	0.389582	0.0382427	0.0348242
3-H1	29.51	29.09	21.02	20.76	29.3	20.89	0.296985	0.183848	8.41	0.349285	8.385	0.025	-0.324285	0.374285	0.982821	0.269223	0.211333
Erbb3	2	2	1	1	2	1	0	0	1	0	1	0	0	0	1	0	0
4-N1	33.34	32.68	22.44	22.5	33.01	22.47	0.46669	0.0424264	10.54	0.468615	10.54	0	-0.468615	0.468615	1	0.38378	0.277342	1	1.03027		1.84038	1.89608
4-N1	32.01	32.9	22.48	22.55	32.455	22.515	0.629325	0.0494975	9.94	0.631269	10.54	-0.6	-1.23127	0.0312686	1.51572	0.832017	0.537157	1.51572	1.56159		1.67597	1.7267
4-N1	29.63	30.21	20.55	20.75	29.92	20.65	0.410122	0.141421	9.27	0.43382	10.54	-1.27	-1.70382	-0.83618	2.41162	0.846009	0.626299	2.41162	2.48461		3.01049	3.10161
4-H1	31.24	31.57	21.69	21.8	31.405	21.745	0.233345	0.0777817	9.66	0.245967	10.54	-0.88	-1.12597	-0.634033	1.84038	0.342103	0.288479	1.64244
4-H1	31.57	31.64	21.74	21.88	31.605	21.81	0.0494975	0.0989949	9.795	0.11068	10.54	-0.745	-0.85568	-0.63432	1.67597	0.133637	0.123768
4-H1	29.51	29.56	20.55	20.62	29.535	20.585	0.0353553	0.0494975	8.95	0.0608276	10.54	-1.59	-1.65083	-1.52917	3.01049	0.129644	0.124291
Prckq	2	2	1	1	2	1	0	0	1	0	1	0	0	0	1	0	0
4-N1	31.43	31.19	22.44	22.48	31.31	22.46	0.169706	0.0282843	8.85	0.172047	8.85	0	-0.172047	0.172047	1	0.126656	0.112417	1	1.03027		0.464902	0.478974
4-N1	31.48	30.85	22.5	22.55	31.165	22.525	0.445477	0.0353553	8.64	0.446878	8.85	-0.21	-0.656878	0.236878	1.15669	0.419979	0.308109	1.15669	1.1917		0.523042	0.538874
4-N1	30.81	30.07	20.55	20.75	30.44	20.65	0.523259	0.141421	9.79	0.542033	8.85	0.94	0.397967	1.48203	0.521233	0.237694	0.163249	0.521233	0.53701		0.0810525	0.0835058
4-H1	31.56	31.78	21.69	21.74	31.67	21.715	0.155563	0.0353553	9.955	0.159531	8.85	1.105	0.945469	1.26453	0.464902	0.0543581	0.0486677	0.89264
4-H1	31.8	31.45	21.8	21.88	31.625	21.84	0.247487	0.0565685	9.785	0.25387	8.85	0.935	0.68113	1.18887	0.523042	0.100634	0.0843962
4-H1	32.69	33.43	20.55	20.62	33.06	20.585	0.523259	0.0494975	12.475	0.525595	8.85	3.625	3.09941	4.15059	0.0810525	0.0356248	0.0247475
Dbd2	2	2	1	1	2	1	0	0	1	0	1	0	0	0	1	0	0
4-N1	35	35	22.44	22.48	35	22.46	0	0.0282843	12.54	0.0282843	12.54	0	-0.0282843	0.0282843	1	0.0197986	0.0194142	1	1.03027		3.55537	3.66298
4-N1	34	35	22.5	22.55	34.5	22.525	0.707107	0.0353553	11.975	0.70799	12.54	-0.565	-1.27299	0.14299	1.47939	0.937232	0.573747	1.47939	1.52417		2.90795	2.99596
4-N1	31.73	31.32	20.55	20.75	31.525	20.65	0.289914	0.141421	10.875	0.322568	12.54	-1.665	-1.98757	-1.34243	3.17114	0.794542	0.635352	3.17114	3.26712		1.72309	1.77525
4-H1	31.52	33.33	21.69	21.74	32.425	21.715	1.27986	0.0353553	10.71	1.28035	12.54	-1.83	-3.11035	-0.549648	3.55537	5.08056	2.09164	1.88351
4-H1	32.84	32.84	21.8	21.88	32.84	21.84	0	0.0565685	11	0.0565685	12.54	-1.54	-1.59657	-1.48343	2.90795	0.116286	0.111815
4-H1	32.21	32.47	20.55	20.62	32.34	20.585	0.183848	0.0494975	11.755	0.190394	12.54	-0.785	-0.975394	-0.594606	1.72309	0.243086	0.213033
